# Supplementary material for: Divergent access to polycyclic spiro- and fused-N,O-ketals through Bi(OTf)3-catalyzed [4+2]-annulation of cyclic N-sulfonyl ketimines and alkynols
Source: Royal Society of Chemistry journal article supplement (doi:10.1039/d3cc05599j), 2024-01-01
Supplement: d3cc05599j1.pdf [file d3cc05599j1.pdf]

## Supplementary Information

### Divergent Access to Polycyclic Spiro- and Fused-*N,O*-Ketals through Bi(OTf)<sub>3</sub>-Catalyzed [4+2]-Annulation of Cyclic *N*-Sulfonyl Ketimines and Alkynols

Ashwini K. Nakate,<sup>†,§</sup> Priyanka Kataria,<sup>†,§</sup> Pooja I. Sambherao,<sup>†,§</sup> Gamidi Rama Krishna,<sup>†,‡</sup>  
and Ravindar Kontham<sup>\*,†,§</sup>

<sup>†</sup>Organic Chemistry Division, CSIR-National Chemical Laboratory, Dr. Homi Bhabha Road,  
Pune 411008, India.

<sup>§</sup>Academy of Scientific and Innovative Research (AcSIR), Ghaziabad 201002, India.

<sup>‡</sup>Center for Materials Characterization, CSIR-National Chemical Laboratory, Dr. Homi  
Bhabha Road, Pune 411008, India.

\*E-mail: [k.ravindar@ncl.res.in](mailto:k.ravindar@ncl.res.in); [konthamravindar@gmail.com](mailto:konthamravindar@gmail.com)

### Table of Contents

| S. No | Contents                                                                                                                                                                                                      | Page No |
|-------|---------------------------------------------------------------------------------------------------------------------------------------------------------------------------------------------------------------|---------|
| 1.    | General Information                                                                                                                                                                                           | S2      |
| 2.    | Synthesis of 5-hexyn-1-ols ( <b>1</b> )                                                                                                                                                                       | S2      |
| 3.    | Synthesis of 4-pentyn-1-ols ( <b>2</b> )                                                                                                                                                                      | S3      |
| 4.    | Synthesis of methylbenzo[d]isothiazole 1,1-dioxide ( <b>S1</b> )                                                                                                                                              | S4      |
| 5.    | General Procedure for the synthesis of cyclic <i>N</i> -sulfonyl ketimines ( <b>5</b> )                                                                                                                       | S4      |
| 6.    | Chemical structures of cyclic <i>N</i> -sulfonyl ketimines ( <b>5</b> )                                                                                                                                       | S4      |
| 7.    | General Procedure for the synthesis of spiro- and fused- <i>N,O</i> -ketals ( <b>6</b> , <b>7</b> and <b>8</b> ) from cyclic <i>N</i> -sulfonyl ketimines ( <b>5</b> ) and alkynols ( <b>1</b> and <b>2</b> ) | S5      |
| 8.    | Synthesis and characterization of fused- <i>N,O</i> -ketals ( <b>6</b> ) from 5-hexyn-1-ols ( <b>1</b> ) and cyclic <i>N</i> -sulfonyl ketimines ( <b>5</b> )                                                 | S6      |
| 9.    | Synthesis and characterization of fused- <i>N,O</i> -ketals ( <b>7</b> ) from 4-pentyn-1-ols ( <b>2</b> ) and cyclic <i>N</i> -sulfonyl ketimines ( <b>5</b> )                                                | S16     |
| 10.   | Synthesis and characterization of spiro- <i>N,O</i> -ketals ( <b>8</b> ) from 4-pentyn-1-ols ( <b>2</b> ) and cyclic <i>N</i> -sulfonyl ketimines ( <b>5</b> ):                                               | S20     |
| 11.   | Synthetic utility                                                                                                                                                                                             | S30     |
| 12.   | Control experiment                                                                                                                                                                                            | S31     |
| 13.   | Single crystal X-ray analyses                                                                                                                                                                                 | S32     |
| 14.   | <sup>1</sup> H, <sup>13</sup> C and 2D NMR Spectra                                                                                                                                                            | S37     |

**1. General Information:** All reactions were performed under argon atmosphere with oven (80 °C) or flame-dried glassware with a septum seal. Tetrahydrofuran (THF) was distilled from sodium-benzophenone under the argon atmosphere immediately before use. Anhydrous dichloromethane, dichloroethane, methanol, and fluorobenzene were purchased from commercial sources and used without any further treatment. Reaction temperatures are reported as the temperature of the bath surrounding the reaction vessel, and 30 °C corresponds to the room temperature (35 °C)(rt) of the laboratory when the experiments were carried out. Analytical thin-layer chromatography (TLC) was performed on TLC Silica gel 60 F<sub>254</sub>. Visualization was accomplished with short-wave UV light, anisaldehyde, or KMnO<sub>4</sub> staining solutions followed by heating. Chromatography was performed on silica gel (100-200 mesh) by standard techniques eluting with solvents as indicated. <sup>1</sup>H and <sup>13</sup>C NMR spectra were recorded on Bruker AV 200, 400, and 500 in solvents as indicated. Chemical shifts (δ) are given in ppm. The residual solvent signals were used as references and the chemical shifts converted to the TMS scale (CDCl<sub>3</sub>: δ H = 7.27 ppm, δ C = 77.00 ppm), the following abbreviations were used: s, singlet; d, doublet; t, triplet; q, quartet; m, multiplet; dd, doublet of doublet; td, triplet doublet; and br, broad. Structural assignments were made with additional information from gCOSY, gHSQC, and gHMBC experiments. HRMS data were recorded on a Thermo Scientific Q-Exactive, Accela 1250 pump, FT-IR instrument (Bruker Alpha Model) at normal temperature with a NaCl pellet (IR grade). Experimental procedures for all new compounds and known compounds without published experimental procedures are described below. Compounds that are not presented in the main text (manuscript) are numbered starting from **S1**.

## **2. Synthesis of 5-hexyn-1-ols (1):**

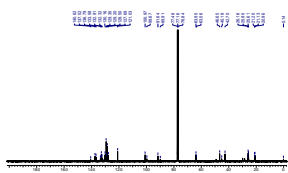

Alkynol **1a** was purchased from commercial sources.

**2-(Prop-2-yn-1-yloxy)ethan-1-ol (1b), 2,2-dimethylhex-5-yn-1-ol (1c), and 5-(But-3-yn-1-yl)-4-hydroxydihydrofuran-2(3H)-one (1f):**

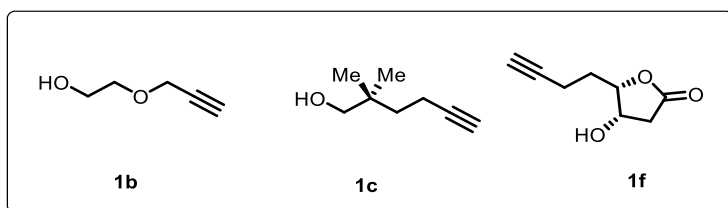

2-(Prop-2-yn-1-yloxy)ethan-1-ol (**1b**), 2,2-dimethylhex-5-yn-1-ol (**1c**), and 5-(but-3-yn-1-yl)-4-hydroxydihydrofuran-2(3*H*)-one (**1f**) were prepared using reported procedures.<sup>1</sup>

### 1-(Prop-2-yn-1-yloxy)propan-2-ol and 2-(prop-2-yn-1-yloxy)propan-1-ol (**1e**):

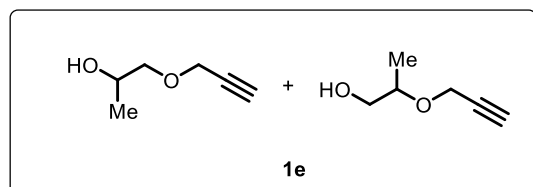

1-(Prop-2-yn-1-yloxy)propan-2-ol and 2-(prop-2-yn-1-yloxy)propan-1-ol (**1e**) was prepared using reported procedure.<sup>2</sup>

### Hept-6-yn-2-ol(**1d**) and 2-methylhept-6-yn-2-ol(**1j**):

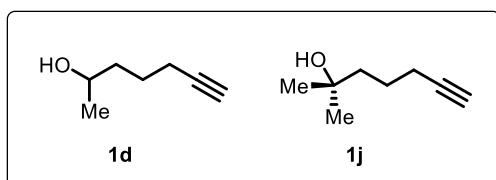

Hept-6-yn-2-ol(**1d**), 2-methylhept-6-yn-2-ol(**1j**) was prepared using reported procedure.<sup>3</sup>

### 3. Synthesis of 4-pentyn-1-ols (**2**):

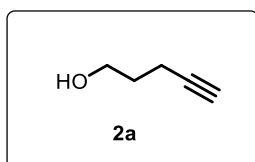

Alkynol **2a** was purchased from commercial sources.

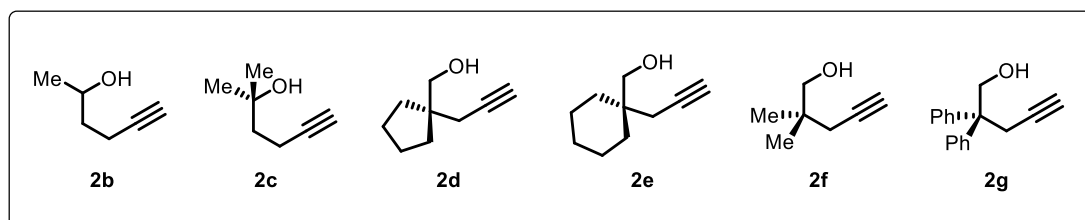

Compound **2b-2g** were prepared using known literature procedures.<sup>4</sup>

1 (a) Nakate, A. K.; Thorat, S. S.; Jain, S.; Gamidi, R. K.; Kumar, V.; Kontham, R. *Org. Chem. Front.* **2022**, 9, 802–809. (b) Ashwini K. N.; Madhukar S. P.; Ravindar K. *Org. Biomol. Chem.*, **2018**, 16, 3229–3240.

2 Harada, T.; Muramatsu, K.; Mizunashi, K.; Kitano, C.; Imaoka, D.; Fujiwara, T.; Kataoka, H. *J. Org. Chem.*, **2008**, 73, 249–258.

3 Thorat, S. S.; Kataria, P.; Kontham, R. *Org. Lett.* **2018**, 20, 872–875.

#### 4. Synthesis of methylbenzo[*d*]isothiazole 1,1-dioxide (**S1**):

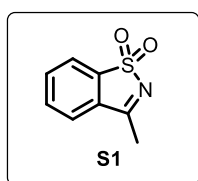

procedure<sup>22</sup> saccharin (10 g, 54.5 mmol, 1.0 eq.) was dissolved in anhydrous THF (100 mL) and cooled to 0 °C under argon atmosphere. Then, methyl magnesium bromide (0.3 M in Et<sub>2</sub>O, 36 mL, 109 mmol, 2.0 eq.) was added over 10 minutes. The reaction mixture was moved to room temperature (35 °C) for 17 h. After completion of the reaction, it was quenched through the slow addition of sat. aq. solution of NH<sub>4</sub>Cl (50 mL) at 0 °C, and the organic layer was separated. The aqueous layer was extracted with CH<sub>2</sub>Cl<sub>2</sub> (3x50 mL). The combined organic layer was dried over MgSO<sub>4</sub>, filtered and concentrated to dryness under reduced pressure to give **S1** as an off-white solid (5.34 g, 29.5 mmol, 54%). <sup>1</sup>H NMR (CDCl<sub>3</sub>, 200 MHz): δ 7.99-7.87 (m, 1H), 7.80-7.70 (m, 3H), 2.67 (s, 3H).

#### 5. General Procedure for the synthesis of cyclic *N*-sulfonyl ketimines (**5**):

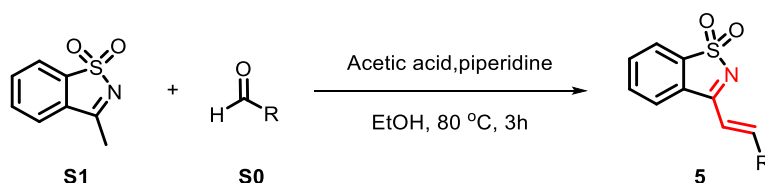

Following the known literature procedure, compound **S1** (1 eq) and aldehyde derivatives **S0** (1 eq) were dissolved in ethanol (10 mL). Then, added acetic acid (0.1 eq) followed by piperidine (0.1 eq), and the resulting mixture was stirred at 80 °C for 3 h, then cooled to 0 °C and filtered. The obtained cake was washed with cold ethanol and subjected to the next step without further purification **5**. (Please see Supporting Information for chemical structures of **5a-5k**).

#### 6. Chemical structures of cyclic *N*-sulfonyl ketimines (**5**):

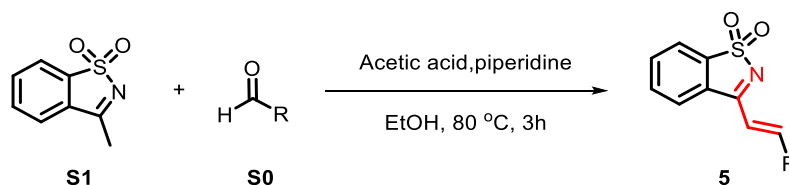

<sup>4</sup> (a) Kambale, D. A.; Thorat, S. S.; Pratapure, M. S.; Gonnade, R. G.; Kontham, R. *Chem. Commun.*, **2017**, 53, 6641–6644.  
(b) Kambale, D. A.; Borade, B. R.; Kontham, R. *Org. Bio. Chem.* **2021**, 19, 6618–6622.

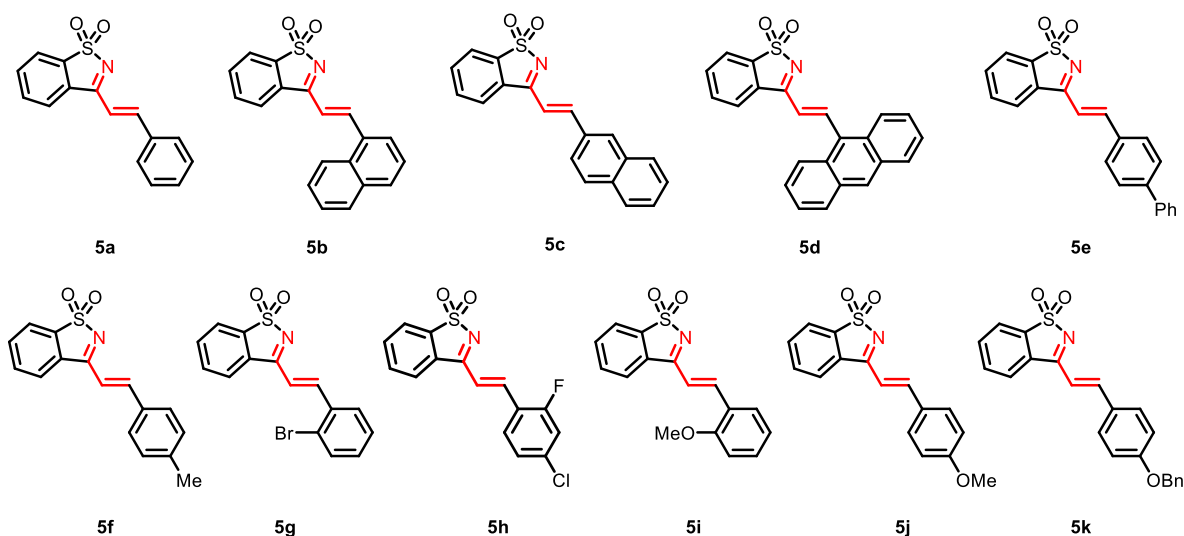

**7. General Procedure for the synthesis of spiro- and fused-*N,O*-ketals (6, 7 and 8) from cyclic *N*-sulfonyl ketimines (5) and alkynols (1 and 2):**

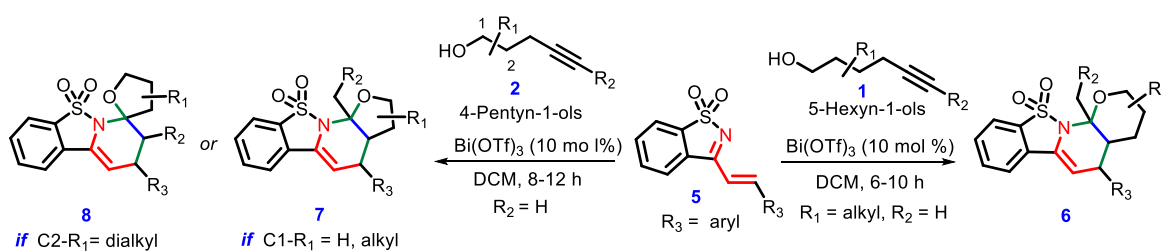

To a single neck 10 mL round bottom flask equipped with positive argon flow, alkynol **1** or **2** (1.01 mmol) and  $\alpha,\beta$ -unsaturated ketimines **5** (1.01 mmol) in 2 mL of anhydrous CH<sub>2</sub>Cl<sub>2</sub> were taken under argon atmosphere, then Bi(OTf)<sub>3</sub> (0.101 mmol) was added to the reaction mixture at room temperature (35 °C). The resulting reaction mixture was stirred at rt for 8 h. After completion of the reaction (monitored by TLC, visualized using UV, anisaldehyde, and KMnO<sub>4</sub> staining solutions), the reaction mixture was quenched with saturated aqueous NaHCO<sub>3</sub> solution, the aqueous layer was extracted with CH<sub>2</sub>Cl<sub>2</sub> (2x5 mL) and washed with brine solution (10 mL). The combined organic layers were dried over anhydrous Na<sub>2</sub>SO<sub>4</sub>, and filtered through sintered glass funnel. The filtrate was concentrated under reduced pressure and purified using silica-gel column chromatography (100-200 mesh) to afford the corresponding spiro- and fused-*N,O*-ketals **6**, **7** and **8**.

## 8. Synthesis and characterization of fused-*N,O*-ketals (**6**) from 5-hexyn-1-ols (**1**) and cyclic *N*-sulfonyl ketimines (**5**):

*12a-Methyl-5-phenyl-3,4,4a,12a-tetrahydro-2H,5H-benzo[4,5]isothiazolo[2,3-*a*]pyrano[3,2-*e*]pyridine 11,11-dioxide (6aa)*: Following the General Procedure, to the mixture of 5-hexyn-1-ol (**1a**) (0.1 g, 1.01 mmol) and (*E*)-3-styrylbenzo[*d*]isothiazole 1,1-dioxide (**5a**) (0.272 g, 1.01 mmol) in anhydrous CH<sub>2</sub>Cl<sub>2</sub> (2 mL), Bi(OTf)<sub>3</sub> (0.066 g, 0.101 mmol) was added under argon

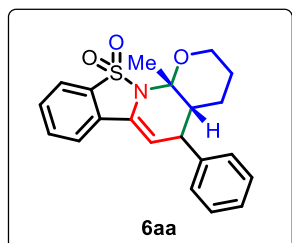

atmosphere at room temperature (35 °C) and reaction mixture was stirred for 8 h at rt. Purification of the crude product by column chromatography (SiO<sub>2</sub>, 30% EtOAc/hexanes) afforded 12a-methyl-5-phenyl-3,4,4a,12a-tetrahydro-2H,5H-benzo[4,5]isothiazolo[2,3-*a*]pyrano[3,2-*e*]pyridine 11,11-dioxide (**6aa**) (0.308 g, 82%) with dr (1:0.2) as an off-white solid. TLC: *R<sub>f</sub>* = 0.60 (SiO<sub>2</sub>, 15% EtOAc/hexanes); <sup>1</sup>H NMR (CDCl<sub>3</sub>, 400 MHz): δ 7.80 (d, *J* = 7.8 Hz, 1H), 7.74-7.01 (m, 1H), 7.66-7.01 (m, 1H), 7.59-7.51 (m, 1H), 7.41-7.35 (m, 2H), 7.32-7.27 (m, 1H), 7.25-7.22 (m, 2H), 5.79 (dd, *J* = 4.25, 0.63 Hz, 0.1H), 5.67 (dd, *J* = 2.3, 1.0 Hz, 1H), 4.39-4.29 (m, 1H), 4.21 (dd, *J* = 5.88, 2.38 Hz, 1H), 3.92-3.83 (m, 1H), 1.95-1.87 (m, 4H), 1.60-1.51 (m, 2H), 1.37-1.25 (m, 1H), 1.04-0.92 (m, 1H); <sup>13</sup>C NMR (CDCl<sub>3</sub>, 101 MHz): δ 143.7, 140.6, 133.5, 132.9, 132.4, 130.2, 129.1, 128.7, 128.6, 127.8, 127.1, 126.8, 121.0, 121.0, 100.6, 99.4, 91.6, 89.8, 63.8, 63.5, 49.2, 46.6, 45.5, 43.1, 26.1, 25.9, 25.5, 25.5, 20.9; IR (KBr, cm<sup>-1</sup>): ν 3153, 3072, 2934, 1717, 1461, 1305, 1177, 1071, 1010, 758, 699; MP: 200-204.5 °C; HRMS (ESI) *m/z* calcd for C<sub>21</sub>H<sub>21</sub>O<sub>3</sub>NS [M+H]<sup>+</sup> 368.1315, found 368.1306.

atmosphere at room temperature (35 °C) and reaction mixture was stirred for 8 h at rt. Purification of the crude product by column chromatography (SiO<sub>2</sub>, 30% EtOAc/hexanes) afforded 12a-methyl-5-phenyl-3,4,4a,12a-tetrahydro-2H,5H-benzo[4,5]isothiazolo[2,3-*a*]pyrano[3,2-*e*]pyridine 11,11-dioxide (**6aa**) (0.308 g, 82%) with dr (1:0.2) as an off-white solid. TLC: *R<sub>f</sub>* = 0.60 (SiO<sub>2</sub>, 15% EtOAc/hexanes); <sup>1</sup>H NMR (CDCl<sub>3</sub>, 400 MHz): δ 7.80 (d, *J* = 7.8 Hz, 1H), 7.74-7.01 (m, 1H), 7.66-7.01 (m, 1H), 7.59-7.51 (m, 1H), 7.41-7.35 (m, 2H), 7.32-7.27 (m, 1H), 7.25-7.22 (m, 2H), 5.79 (dd, *J* = 4.25, 0.63 Hz, 0.1H), 5.67 (dd, *J* = 2.3, 1.0 Hz, 1H), 4.39-4.29 (m, 1H), 4.21 (dd, *J* = 5.88, 2.38 Hz, 1H), 3.92-3.83 (m, 1H), 1.95-1.87 (m, 4H), 1.60-1.51 (m, 2H), 1.37-1.25 (m, 1H), 1.04-0.92 (m, 1H); <sup>13</sup>C NMR (CDCl<sub>3</sub>, 101 MHz): δ 143.7, 140.6, 133.5, 132.9, 132.4, 130.2, 129.1, 128.7, 128.6, 127.8, 127.1, 126.8, 121.0, 121.0, 100.6, 99.4, 91.6, 89.8, 63.8, 63.5, 49.2, 46.6, 45.5, 43.1, 26.1, 25.9, 25.5, 25.5, 20.9; IR (KBr, cm<sup>-1</sup>): ν 3153, 3072, 2934, 1717, 1461, 1305, 1177, 1071, 1010, 758, 699; MP: 200-204.5 °C; HRMS (ESI) *m/z* calcd for C<sub>21</sub>H<sub>21</sub>O<sub>3</sub>NS [M+H]<sup>+</sup> 368.1315, found 368.1306.

*12a-Methyl-5-(naphthalen-1-yl)-3,4,4a,12a-tetrahydro-2H,5H-benzo[4,5]isothiazolo[2,3-*a*]pyrano[3,2-*e*]pyridine 11,11-dioxide (6ab)*: Following the General Procedure, to the

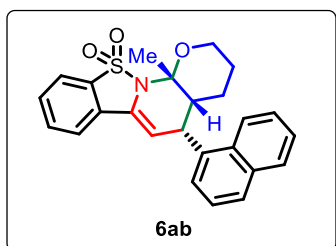

mixture of 5-hexyn-1-ol (**1a**) (0.1 g, 1.01 mmol) and (*E*)-3-(2-(naphthalen-1-yl)vinyl)benzo[*d*]isothiazole 1,1-dioxide (**5b**) (0.322 g, 1.01 mmol) in anhydrous CH<sub>2</sub>Cl<sub>2</sub> (2 mL), Bi(OTf)<sub>3</sub> (0.066 g, 0.101 mmol) was added under argon atmosphere at room temperature (35 °C) and reaction mixture was stirred for 8

h at rt. Purification of the crude product by column chromatography (SiO<sub>2</sub>, 30% EtOAc/hexanes) afforded 12a-methyl-5-(naphthalen-1-yl)-3,4,4a,12a-tetrahydro-2H,5H-benzo[4,5]isothiazolo[2,3-*a*]pyrano[3,2-*e*]pyridine 11,11-dioxide (**6ab**) (0.330 g, 79%) as a white crystal. TLC: *R<sub>f</sub>* = 0.50 (SiO<sub>2</sub>, 15% EtOAc/hexanes); **6ab** was confirmed by <sup>1</sup>H NMR,

$^{13}\text{C}$  NMR, DEPT, HRMS and XRD analysis; $^{20}$   $^1\text{H}$  NMR ( $\text{CDCl}_3$ , 400 MHz):  $\delta$  8.05 (d,  $J$  = 8.38 Hz, 1H), 7.92 (dd,  $J$  = 7.88, 1.13 Hz, 1H), 7.86-7.74 (m, 3H), 7.68-7.63 (m, 1H), 7.61-7.52 (m, 3H), 7.50-7.45 (m, 1H), 7.40 (dd,  $J$  = 7.07, 1.06 Hz, 1H), 5.76 (d,  $J$  = 1.25 Hz, 1H), 5.02 (dd,  $J$  = 5.63, 2.25 Hz, 1H), 4.35 (td,  $J$  = 11.76, 3.63 Hz, 1H), 3.86 (td,  $J$  = 11.76, 2.63 Hz, 1H), 2.33-2.20 (m, 1H), 2.08 (s, 3H) 1.51-1.29 (m, 3H), 0.80-0.71 (m, 1H);  $^{13}\text{C}\{^1\text{H}\}$  NMR ( $\text{CDCl}_3$ , 101 MHz):  $\delta$  136.2, 134.1, 133.6, 133, 132.5, 131.4, 130.2, 129.4, 129.2, 127.9, 126.7, 126.4, 126.1, 125.3, 122.5, 121.1, 101.6, 91.6, 63.8, 44.5, 25.8, 25.5, 21.5; IR (KBr,  $\text{cm}^{-1}$ ):  $\nu$  3142, 3064, 2930, 1705, 1459, 1311, 1177, 1069, 1027, 794, 698; HRMS (ESI)  $m/z$  calcd for  $\text{C}_{25}\text{H}_{23}\text{O}_3\text{NS}$   $[\text{M}+\text{H}]^+$  418.1471, found 418.1466.

*12a-Methyl-5-(naphthalen-2-yl)-3,4,4a,12a-tetrahydro-2H,5H-benzo[4,5]isothiazolo[2,3-a]pyrano[3,2-e]pyridine 11,11-dioxide (6ac)*: Following the *General Procedure*, to the

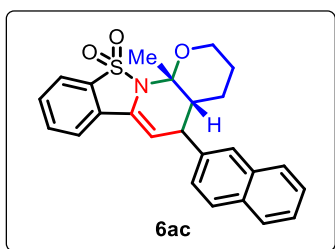

mixture of 5-hexyn-1-ol (**1a**) (0.1 g, 1.01 mmol) and (*E*)-3-(2-(naphthalen-2-yl)vinyl)benzo[*d*]isothiazole 1,1-dioxide (**5c**) (0.322 g, 1.01 mmol) in anhydrous  $\text{CH}_2\text{Cl}_2$  (2 mL),  $\text{Bi}(\text{OTf})_3$  (0.066 g, 0.101 mmol) was added under argon atmosphere at room temperature (35  $^\circ\text{C}$ ) and reaction mixture was stirred for 8

h at rt. Purification of the crude product by column chromatography ( $\text{SiO}_2$ , 30% EtOAc/hexanes) afforded 12a-methyl-5-(naphthalen-2-yl)-3,4,4a,12a-tetrahydro-2H,5H-benzo[4,5]isothiazolo[2,3-*a*]pyrano[3,2-*e*]pyridine 11,11-dioxide (**6ac**) (0.299 g, 71%) as an off-white solid. TLC:  $R_f$  = 0.60 ( $\text{SiO}_2$ , 15% EtOAc/hexanes);  $^1\text{H}$  NMR ( $\text{CDCl}_3$ , 400 MHz):  $\delta$  7.87-7.82 (m, 4H), 7.79 (d,  $J$  = 7.93 Hz, 1H), 7.69 (s, 1H), 7.66 (t,  $J$  = 7.63 Hz, 1H), 7.61-7.56 (m, 1H), 7.54-7.46 (m, 2H), 7.36 (dd,  $J$  = 1.53, 8.24 Hz, 1H), 5.85-5.74 (m, 1H), 4.38 (dd,  $J$  = 2.44, 5.49 Hz, 1H), 4.35 (dd,  $J$  = 3.97, 6.41 Hz, 1H), 3.88 (d,  $J$  = 12.21 Hz, 1H), 2.34-2.28 (m, 1H), 2.02 (td,  $J$  = 5.49, 10.38 Hz, 1H), 1.96 (s, 3H), 1.55-1.49 (m, 2H), 1.40-1.34 (m, 1H), 1.00-0.95 (m, 1H);  $^{13}\text{C}\{^1\text{H}\}$  NMR ( $\text{CDCl}_3$ , 101 MHz):  $\delta$  138.2, 133.7, 133.5, 133, 132.6, 132.6, 130.3, 129.2, 128.4, 127.8, 127.8, 127, 126.9, 126.5, 126, 121.1, 121.1, 100.5, 91.6, 63.9, 46.6, 43.2, 25.9, 25.5, 21.1; IR (KBr,  $\text{cm}^{-1}$ ):  $\nu$  3143, 3004, 2929, 1702, 1599, 1464, 1308, 1178, 1069, 1011, 746; MP: 176-179.2  $^\circ\text{C}$ ; HRMS (ESI)  $m/z$  calcd for  $\text{C}_{25}\text{H}_{23}\text{O}_3\text{NS}$   $[\text{M}+\text{H}]^+$  418.1471, found 418.1464.

*5-(Anthracen-9-yl)-12a-methyl-3,4,4a,12a-tetrahydro-2H,5H-benzo[4,5]isothiazolo[2,3-a]pyrano[3,2-e]pyridine 11,11-dioxide (6ad)*: Following the *General Procedure*, to the mixture of 5-hexyn-1-ol (**1a**) (0.1 g, 1.01 mmol) and (*E*)-3-(2-(anthracen-9-

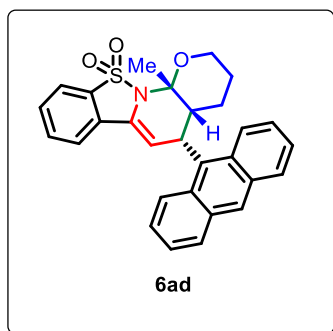

yl)vinyl)benzo[*d*]isothiazole 1,1-dioxide (**5d**) (0.376 g, 1.01 mmol) in anhydrous CH<sub>2</sub>Cl<sub>2</sub> (2 mL), Bi(OTf)<sub>3</sub> (0.066 g, 0.101 mmol) was added under argon atmosphere at room temperature (35 °C) and reaction mixture was stirred for 8 h at rt. Purification of the crude product by column chromatography (SiO<sub>2</sub>, 30% EtOAc/hexanes) afforded 5-(anthracen-9-yl)-12a-methyl-3,4,4a,12a-tetrahydro-2*H*,5*H*-benzo[4,5]isothiazolo [2,3-*a*]pyrano[3,2-*e*]pyridine 11,11-dioxide (**6ad**) (0.325 g, 68%) as an off-white solid. TLC: *R<sub>f</sub>* = 0.50 (SiO<sub>2</sub>, 15% EtOAc/hexanes); <sup>1</sup>H NMR (400 MHz, CDCl<sub>3</sub>) δ 8.67 (d, *J* = 9.01 Hz, 1H), 8.46 (s, 1H), 8.28 (d, *J* = 9.01 Hz, 1H), 8.08 (d, *J* = 8.25 Hz, 1H), 8.03 (d, *J* = 8.26 Hz, 1H), 7.89 (d, *J* = 7.50 Hz, 1H), 7.73-7.58 (m, 4H), 7.58-7.50 (m, 1H), 7.50-7.34 (m, 2H), 6.09 (m, 1H), 5.69-5.66 (m, 1H), 4.46 (dt, *J* = 3.63, 11.88 Hz, 1H), 3.96-3.90 (m, 1H), 2.53-2.45 (m, 1H), 2.18 (s, 3H), 2.12-1.82 (m, 2H), 1.60 (br. s., 2H); <sup>13</sup>C{<sup>1</sup>H} NMR (101 MHz, CDCl<sub>3</sub>) δ 133.6, 133.1, 132.1, 131.7, 131.6, 131.3, 130.7, 130.1, 130.0, 129.7, 129.6, 129.5, 128.4, 127.0, 126.7, 125.2, 125.1, 124.8, 122.9, 121.2, 120.9, 105.3, 91.4, 64.3, 46.9, 39.5, 26.0, 26.0, 22.8; HRMS (ESI): *m/z* calcd for C<sub>29</sub>H<sub>26</sub>O<sub>3</sub>NS [M+H]<sup>+</sup> 468.1628, found 468.1622.

5-([1,1'-Biphenyl]-4-yl)-12a-methyl-3,4,4a,12a-tetrahydro-2*H*,5*H*-benzo[4,5]isothiazolo[2,3-*a*]pyrano[3,2-*e*]pyridine 11,11-dioxide (**6ae**):

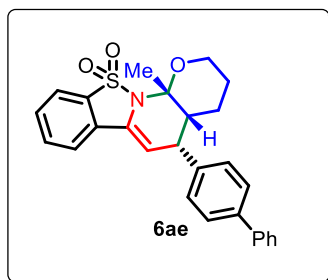

Following the *General Procedure*, to the mixture of 5-hexyn-1-ol (**1a**) (0.1 g, 1.01 mmol) and (*E*)-3-(2-([1,1'-biphenyl]-4-yl)vinyl)benzo[*d*]isothiazole 1,1-dioxide (**5e**) (0.348 g, 1.01 mmol) in anhydrous CH<sub>2</sub>Cl<sub>2</sub> (2 mL), Bi(OTf)<sub>3</sub> (0.066 g, 0.101 mmol) was added under argon atmosphere at room temperature (35 °C) and reaction mixture was stirred for 8 h at rt. Purification of the crude product by column chromatography (SiO<sub>2</sub>, 30% EtOAc/hexanes) afforded 5-([1,1'-biphenyl]-4-yl)-12a-methyl-3,4,4a,12a-tetrahydro-2*H*,5*H*-benzo[4,5]isothiazolo[2,3-*a*]pyrano[3,2-*e*]pyridine 11,11-dioxide (**6ae**) (0.294 g, 65%) as an off-white solid. TLC: *R<sub>f</sub>* = 0.60 (SiO<sub>2</sub>, 15% EtOAc/hexanes); <sup>1</sup>H NMR (400 MHz, CDCl<sub>3</sub>) δ 7.85-7.80 (m, 1H), 7.74 (d, *J* = 7.75 Hz, 1H), 7.67-7.53 (m, 6H), 7.48-7.43 (m, 2H), 7.37 (td, *J* = 1.13, 7.25 Hz, 1H), 7.31 (d, *J* = 8.13 Hz, 2H), 5.70 (dd, *J* = 1.13, 2.50 Hz, 1H), 4.40-4.29 (m, 1H), 4.25 (dd, *J* = 2.38, 5.88 Hz, 1H), 3.95-3.84 (m, 1H), 1.99-1.94 (m, 1H), 1.93 (s, 3H), 1.65-1.55 (m, 4H); <sup>13</sup>C{<sup>1</sup>H} NMR (101 MHz, CDCl<sub>3</sub>) δ 140.7, 140.1, 139.7, 133.6, 133.0, 132.5, 130.2, 129.1, 129.0, 129.0,



127.5, 127.3, 127.1, 121.0, 121.0, 100.5, 91.6, 63.9, 46.6, 42.8, 25.9, 25.6, 21.0; HRMS (ESI):  $m/z$  calcd for  $C_{27}H_{26}O_3NS$   $[M+H]^+$  444.1628, found 444.1621.

*12a-Methyl-5-(p-tolyl)-3,4,4a,12a-tetrahydro-2H,5H-benzo[4,5]isothiazolo[2,3-*

*a]pyrano[3,2-e]pyridine 11,11-dioxide (6af)*: Following the *General Procedure*, to the

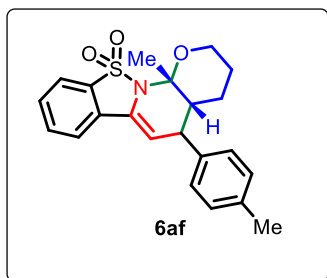

mixture of 5-hexyn-1-ol (**1a**) (0.1 g, 1.01 mmol) and (*E*)-3-(4-methylstyryl)benzo[d]isothiazole 1,1-dioxide (**5f**) (0.286 g, 1.01 mmol) in anhydrous  $CH_2Cl_2$  (2 mL),  $Bi(OTf)_3$  (0.066 g, 0.101 mmol) was added under argon atmosphere at room temperature (35 °C) and the reaction mixture was stirred for 8 h at rt. Purification of the crude product by column chromatography

( $SiO_2$ , 30% EtOAc/hexanes) afforded 12a-methyl-5-(p-tolyl)-3,4,4a,12a-tetrahydro-2H,5H-benzo[4,5]isothiazolo[2,3-a]pyrano[3,2-e]pyridine 11,11-dioxide (**6af**) (0.246 g, 64%) with dr (1:0.1) as an off-white solid. TLC:  $R_f$  = 0.70 ( $SiO_2$ , 15% EtOAc/hexanes);  $^1H$  NMR ( $CDCl_3$ , 400 MHz):  $\delta$  7.79 (d,  $J$  = 7.88 Hz, 1H), 7.72 (d,  $J$  = 7.75 Hz, 1H), 7.66-7.60 (m, 1H), 7.55 (t,  $J$  = 7.38 Hz, 1H), 7.18 (d,  $J$  = 7.88 Hz, 2H), 7.12 (d,  $J$  = 8.13 Hz, 2H), 5.68-5.63 (m, 1H), 4.39-4.29 (m, 1H), 4.17 (dd,  $J$  = 2.25, 5.75 Hz, 1H), 3.91-3.83 (m, 1H), 2.37 (s, 3H), 1.90 (s, 3H), 1.89-1.84 (m, 1H), 1.59-1.50 (m, 2H), 1.39-1.20 (m, 2H), 1.07-0.96 (m, 1H);  $^{13}C\{^1H\}$  NMR ( $CDCl_3$ , 101 MHz):  $\delta$  137.5, 136.8, 133.6, 132.9, 132.3, 130.1, 129.3, 129.2, 128.5, 121, 101, 91.6, 63.9, 46.6, 42.7, 25.6, 25.6, 21.2, 20.9; IR (KBr,  $cm^{-1}$ ):  $\nu$  3133, 3071, 2940, 1667, 1511, 1463, 1308, 1176, 1069, 1008, 932, 748; MP: 216-219 °C; HRMS (ESI)  $m/z$  calcd for  $C_{22}H_{23}O_3NS$   $[M+H]^+$  382.1471, found 382.1469.

*5-(2-Bromophenyl)-12a-methyl-3,4,4a,12a-tetrahydro-2H,5H-benzo[4,5]isothiazolo[2,3-*

*a]pyrano[3,2-e]pyridine 11,11-dioxide (6ag)*: Following the *General Procedure*, to the

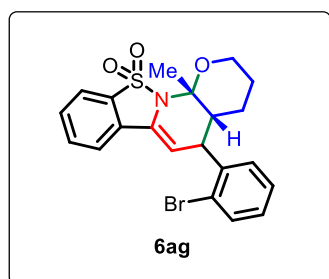

mixture of 5-hexyn-1-ol (**1a**) (0.1 g, 1.01 mmol) and (*E*)-3-(2-bromostyryl)benzo[d]isothiazole 1,1-dioxide (**5g**) (0.351 g, 1.01 mmol) in anhydrous  $CH_2Cl_2$  (2 mL),  $Bi(OTf)_3$  (0.066 g, 0.101 mmol) was added under argon atmosphere at room temperature (35 °C) and reaction mixture was stirred for 8 h at rt. Purification of the crude product by column chromatography

( $SiO_2$ , 30% EtOAc/hexanes) afforded 5-(2-bromophenyl)-12a-methyl-3,4,4a,12a-tetrahydro-2H,5H-benzo[4,5]isothiazolo[2,3-a]pyrano[3,2-e]pyridine 11,11-dioxide (**6ag**) (0.380 g, 83%) in dr (1:0.3) as a white solid. TLC:  $R_f$  = 0.70 ( $SiO_2$ , 15% EtOAc/hexanes);  $^1H$  NMR

(CDCl<sub>3</sub>, 400 MHz):  $\delta$  7.86 - 7.80 (m, 1H), 7.78 - 7.69 (m, 1H), 7.68-7.55 (m, 4H), 7.36-7.29 (m, 1H), 7.25-7.09 (m, 2H), 5.65 (dd,  $J$  = 4.88, 1.0 Hz, 0.34H), ), 5.61-5.55 (m, 1H), 4.62 (dd,  $J$  = 2.4, 5.6 Hz, 1H), 4.40-4.23 (m, 1H), 3.95-3.82 (m, 1H), 2.34-2.20 (m, 1H), 1.95 (s, 3H), 1.60-1.56 (m, 2H), 139-1.25 (m, 1H), 0.96-0.86 (m 1H); <sup>13</sup>C NMR (CDCl<sub>3</sub>, 101 MHz):  $\delta$  140.6, 137.5, 136.8, 133.6, 133.0, 132.9, 132.3, 130.2, 129.4, 129.2, 128.5, 127.7, 121.0, 101.0, 99.7, 91.6, 89.9, 63.9, 63.6, 46.6, 45.2, 42.7, 26.2, 25.9, 25.6, 21.2, 21; IR (KBr, cm<sup>-1</sup>):  $\nu$  3191, 3144, 3069, 2928, 2859, 1699, 1666, 1462, 1391, 1311, 1184, 1012, 933, 750, 693; MP: 197-199.4 °C; HRMS (ESI)  $m/z$  calcd for C<sub>21</sub>H<sub>20</sub>O<sub>3</sub>NBrS [M+H]<sup>+</sup> 446.0420, found 446.0411.

*5-(4-Chloro-2-fluorophenyl)-12a-methyl-3,4,4a,12a-tetrahydro-2H,5H-*

*benzo[4,5]isothiazolo[2,3-a]pyrano[3,2-e]pyridine 11,11-dioxide (6ah):* Following the

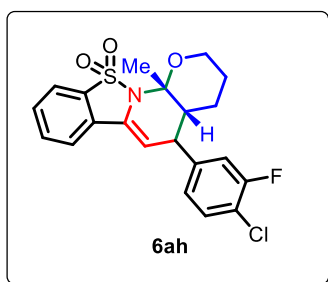

*General Procedure*, to the mixture of 5-hexyn-1-ol (**1a**) (0.1 g, 1.01 mmol) and (*E*)-3-(4-chloro-2-fluorostyryl)benzo[d]isothiazole 1,1-dioxide (**5h**) (0.321 g, 1.01 mmol) in anhydrous CH<sub>2</sub>Cl<sub>2</sub> (2 mL), Bi(OTf)<sub>3</sub> (0.066 g, 0.101 mmol) was added under argon atmosphere at room temperature (35 °C) and the reaction mixture was stirred for 8 h at rt.

Purification of the crude product by column chromatography (SiO<sub>2</sub>, 30% EtOAc/hexanes) afforded

*5-(4-chloro-2-fluorophenyl)-12a-methyl-3,4,4a,12a-tetrahydro-2H,5H-benzo[4,5]isothiazolo[2,3-a]pyrano[3,2-e]pyridine 11,11-dioxide (6ah)* (0.169 g, 39%) with dr (1:0.5) as an off-white solid. TLC:  $R_f$  = 0.70 (SiO<sub>2</sub>, 15% EtOAc/hexanes); <sup>1</sup>H NMR (400 MHz, CDCl<sub>3</sub>)  $\delta$  7.83-7.79 (m, 2H), 7.76-7.69 (m, 2H), 7.65 (d,  $J$  = 7.63 Hz, 1H), 7.58 (d,  $J$  = 7.38 Hz, 1H), 7.19 (d,  $J$  = 8.00 Hz, 1H), 7.16-7.13 (m, 2H), 7.12-7.09 (m, 1H), 5.60 (d,  $J$  = 4.38 Hz, 1H), 5.54-5.51 (m, 1H), 4.47 (dd,  $J$  = 2.25, 5.63 Hz, 1H), 4.37-4.29 (m, 1H), 4.25 (dt,  $J$  = 2.75, 11.76 Hz, 1H), 3.91-3.86 (m, 2H), 3.72 (d,  $J$  = 4.63 Hz, 1H), 2.13-2.00 (m, 2H), 1.89 (s, 3H), 1.76-1.70 (m, 1H), 1.61-1.55 (m, 3H), 1.36-1.28 (m, 1H), 1.00-0.93 (m, 1H); <sup>13</sup>C{<sup>1</sup>H} NMR (101 MHz, CDCl<sub>3</sub>)  $\delta$  161.8, 159.3, 133.8, 133.7, 133.6, 133.5, 133.1, 133.0, 133.0, 132.9, 131.0, 130.9, 130.5, 130.4, 130.3, 130.2, 128.8, 128.8, 126.5, 126.4, 124.5, 124.5, 124.4, 124.3, 121.1, 121.0, 116.6, 116.3, 98.7, 97.0, 91.4, 89.9, 63.8, 43.9, 36.3, 36.3, 25.7, 25.6, 25.4, 21.3; <sup>19</sup>F NMR (376 MHz, CDCl<sub>3</sub>)  $\delta$  -114.37, -115.91; HRMS (ESI):  $m/z$  calcd for C<sub>21</sub>H<sub>20</sub>O<sub>3</sub>NCIFS [M+H]<sup>+</sup> 420.0831, found 420.0825.

5-(2-Methoxyphenyl)-12a-methyl-3,4,4a,12a-tetrahydro-2H,5H-benzo[4,5]isothiazolo[2,3-a]pyrano[3,2-e]pyridine 11,11-dioxide (**6ai**):

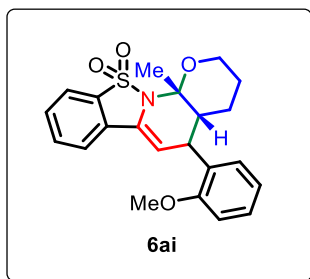

Following the *General Procedure*, to the mixture of 5-hexyn-1-ol (**1a**) (0.1 g, 1.01 mmol) and (*E*)-3-(2-methoxystyryl)benzo[*d*]isothiazole 1,1-dioxide (**5i**) (0.302 g, 1.01 mmol) in anhydrous CH<sub>2</sub>Cl<sub>2</sub> (2 mL), Bi(OTf)<sub>3</sub> (0.066 g, 0.101 mmol) was added under argon atmosphere at room temperature (35 °C) and reaction mixture was stirred for 8 h at rt. Purification

of the crude product by column chromatography (SiO<sub>2</sub>, 30% EtOAc/hexanes) afforded 5-(2-methoxyphenyl)-12a-methyl-3,4,4a,12a-tetrahydro-2H,5H-benzo[4,5]isothiazolo[2,3-a]pyrano[3,2-e]pyridine 11,11-dioxide (**6ai**) (0.325 g, 80%) with dr. 1:0.2 as a white solid. TLC: *R<sub>f</sub>* = 0.60 (SiO<sub>2</sub>, 15% EtOAc/hexanes); <sup>1</sup>H NMR (CDCl<sub>3</sub>, 400 MHz): δ 7.83-7.79 (m, 1H), 7.76-7.70 (m, 1H), 7.62 (td, *J* = 7.25, 1.06 Hz, 1H), 7.58-7.52 (m, 1H), 7.30-7.27(m, 1H), 7.23-7.16 (m, 1H), 6.98-6.85 (m, 2.46H), 5.68 (dd, *J* = 4.88, 1.08 hz, 0.23H), 5.63 (dd, *J* = 2.56, 1.08 hz, 1H), 4.59 (dd, *J* = 5.63, 2.50 Hz, 1H), 4.40-4.23 (m, 1H), 3.90-3.88 (m, 1H), 3.86 (m, 3H), 2.22-2.12 (m, 1H), 1.92 (s, 3H), 1.60-1.53(m, 2H), 1.35-1.22 (m, 1H), 0.99-0.88(m, 1H); <sup>13</sup>C{<sup>1</sup>H} NMR (CDCl<sub>3</sub>, 101 MHz): δ 157.1, 133.5, 132.9, 132.9, 132.2, 130.1, 130, 129.5, 129.3, 128.8, 128.2, 128, 121.1, 120.9, 120.3, 120.3, 110.4, 101.7, 99.9, 91.8, 90.6, 63.8,, 63.6, 55.5, 55.5, 47.2, 43, 41.1, 36.8, 26.6, 25.7, 25.7, 21.4; HRMS (ESI) *m/z* calcd for C<sub>22</sub>H<sub>23</sub>O<sub>4</sub>NS [M+H]<sup>+</sup> 398.1421, found 398.1413.

5-(4-Methoxyphenyl)-12a-methyl-3,4,4a,12a-tetrahydro-2H,5H-benzo[4,5]isothiazolo[2,3-a]pyrano[3,2-e]pyridine 11,11-dioxide (**6aj**):

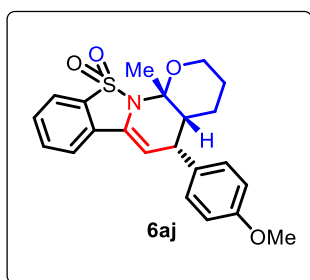

Following the *General Procedure*, to the mixture of 5-hexyn-1-ol (**1a**) (0.1 g, 1.01 mmol) and (*E*)-3-(4-methoxystyryl)benzo[*d*]isothiazole 1,1-dioxide (**5j**) (0.302 g, 1.01 mmol) in anhydrous CH<sub>2</sub>Cl<sub>2</sub> (2 mL), Bi(OTf)<sub>3</sub> (0.066 g, 0.101 mmol) was added under argon atmosphere at room temperature (35 °C) and the reaction mixture was stirred for 8 h at rt. Purification of the crude product by column chromatography

(SiO<sub>2</sub>, 30% EtOAc/hexanes) afforded 5-(4-methoxyphenyl)-12a-methyl-3,4,4a,12a-tetrahydro-2H,5H-benzo[4,5]isothiazolo[2,3-a]pyrano[3,2-e]pyridine 11,11-dioxide (**6aj**) (0.332 g, 82%) as an white solid, **6aj** was confirmed by <sup>1</sup>H NMR, <sup>13</sup>C NMR, DEPT, HRMS and 2D analysis;<sup>20</sup> TLC: *R<sub>f</sub>* = 0.60 (SiO<sub>2</sub>, 15% EtOAc/hexanes); <sup>1</sup>H NMR (CDCl<sub>3</sub>, 500 MHz): δ 7.81 (d, *J* = 7.78 Hz, 1H), 7.70 (d, *J* = 7.78 Hz, 1H), 7.65-7.60 (m, 1H), 7.58-7.53 (m, 1H), 7.16-7.12 (m, 2H), 6.93-6.88 (m, 2H), 5.63 (dd, *J* = 2.40 Hz, 1.03 1H), 4.39-4.28 (m, 1H),

4.16 (dd,  $J = 5.72, 2.29$  Hz, 1H), 3.87 (dt,  $J = 11.27, 1.92$  Hz, 1H), 3.82 (s, 3H), 1.92-1.83 (m, 4H), 1.57-1.54 (m, 2H), 1.34-1.27 (m, 1H), 1.07-0.97 (m, 1H);  $^{13}\text{C}\{^1\text{H}\}$  NMR ( $\text{CDCl}_3$ , 126 MHz):  $\delta$  158.8, 133.6, 132.9, 132.5, 132.3, 130.2, 129.6, 129.2, 121.1, 114.1, 101.1, 91.7, 63.9, 55.5, 46.7, 42.3, 25.9, 25.6, 20.6; HRMS (ESI)  $m/z$  calcd for  $\text{C}_{22}\text{H}_{23}\text{O}_4\text{NS}$   $[\text{M}+\text{H}]^+$  398.1421, found 398.1416.

*5-(4-(Benzyloxy)phenyl)-12a-methyl-3,4,4a,12a-tetrahydro-2H,5H-*

*benzo[4,5]isothiazolo[2,3-a]pyrano[3,2-e]pyridine 11,11-dioxide (6ak):* Following the

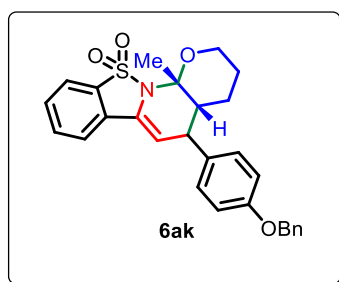

*General Procedure*, to the mixture of 5-hexyn-1-ol (**1a**) (0.1 g, 1.01 mmol) and (*E*)-3-(4-(benzyloxy)styryl)benzo[*d*]isothiazole 1,1-dioxide (**5k**) (0.380 g, 1.01 mmol) in anhydrous  $\text{CH}_2\text{Cl}_2$  (2 mL),  $\text{Bi}(\text{OTf})_3$  (0.066 g, 0.101 mmol) was added under argon atmosphere at room temperature (35 °C) and reaction mixture was stirred for 8 h at rt. Purification of the crude product by

column chromatography ( $\text{SiO}_2$ , 30% EtOAc/hexanes) afforded 5-(4-(benzyloxy)phenyl)-12a-methyl-3,4,4a,12a-tetrahydro-2H,5H-benzo[4,5] isothiazolo[2,3-*a*]pyrano[3,2-*e*]pyridine 11,11-dioxide (**6ak**) (0.313 g, 65%) as a white solid. TLC:  $R_f = 0.70$  ( $\text{SiO}_2$ , 15% EtOAc/hexanes);  $^1\text{H}$  NMR ( $\text{CDCl}_3$ , 400 MHz):  $\delta$  7.81 (d,  $J = 7.75$  Hz, 1H), 7.72-7.67 (m, 1H), 7.65-7.59 (m, 1H), 7.59-7.52 (m, 1H), 7.48-7.32 (m, 5H), 7.14 (d,  $J = 8.63$  Hz, 2H), 6.98 (d,  $J = 8.63$  Hz, 2H), 5.68-5.59 (m, 1H), 5.08 (s, 2H), 4.39-4.28 (m, 1H), 4.22 (t,  $J = 5.75$  Hz, 1H), 4.16 (dd,  $J = 2.38, 5.75$  Hz, 1H), 3.92-3.82 (m, 1H), 1.90 (s, 3H), 1.86 (dd,  $J = 3.13, 8.13$  Hz, 1H), 1.48-1.38 (m, 1H), 1.36-1.29 (m, 2H), 1.07-0.98 (m, 1H);  $^{13}\text{C}\{^1\text{H}\}$  NMR ( $\text{CDCl}_3$ , 101 MHz):  $\delta$  158. 137.1, 133.6, 132.9, 132.8, 132.3, 130.2, 129.6, 129.2, 128.8, 128.2, 127.6, 121, 121, 115, 101.1, 91.6, 70.3, 63.9, 46.7, 42.3, 25.9, 25.6, 21; IR (KBr,  $\text{cm}^{-1}$ ):  $\nu$  3747, 3401, 3363, 3293, 2934, 1510, 1452, 1307, 1244, 1179, 1057, 934, 815, 697; HRMS (ESI)  $m/z$  calcd for  $\text{C}_{28}\text{H}_{27}\text{O}_4\text{NS}$   $[\text{M}+\text{H}]^+$  474.1734, found 474.1731.

*5-(4-Methoxyphenyl)-12a-methyl-2,3,4a,12a-tetrahydro-5H-benzo[4,5]isothiazolo[2,3-*

*a][1,4]dioxino[2,3-e]pyridine 11,11-dioxide (6bj):* Following the *General Procedure*, to the mixture of 2-(prop-2-yn-1-yloxy)ethan-1-ol (**1b**) (0.1 g, 1.01 mmol) and (*E*)-3-(4-methoxystyryl)benzo[*d*]isothiazole 1,1-dioxide (**5j**) (0.299 g, 1.01 mmol) in anhydrous  $\text{CH}_2\text{Cl}_2$  (2 mL),  $\text{Bi}(\text{OTf})_3$  (0.066 g, 0.101 mmol) was added under argon atmosphere at room temperature (35 °C) and the reaction mixture was stirred for 8 h at rt. Purification of the crude product by column chromatography ( $\text{SiO}_2$ , 30% EtOAc/hexanes) afforded 5-(4-

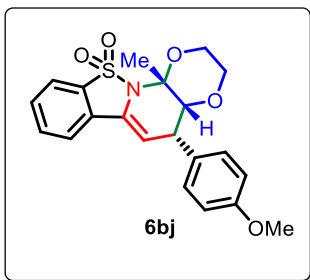

methoxyphenyl)-12a-methyl-2,3,4a,12a-tetrahydro-5H-benzo[4,5]isothiazolo[2,3-*a*][1,4] dioxino[2,3-*e*]pyridine 11,11-dioxide (**6bj**) (0.230 g, 58%) as a white solid. TLC:  $R_f = 0.60$  (SiO<sub>2</sub>, 15% EtOAc/hexanes); <sup>1</sup>H NMR (CDCl<sub>3</sub>, 500 MHz):  $\delta$  7.82 (d,  $J = 7.93$  Hz, 1H), 7.69 (d,  $J = 7.63$  Hz, 1H), 7.62 (td,  $J = 7.32$ , 1.22 Hz, 1H), 7.59-7.55 (m, 1H), 7.25-7.23 (m, 2H), 6.95-6.88 (m, 2H), 5.57 (dd,  $J = 2.44$ , 1.22 Hz, 1H), 4.61 (d,  $J = 3.36$  Hz, 1H), 4.03-3.97 (m, 1H), 3.82 (s, 3H), 3.81-3.78 (m, 1H), 3.69-3.62 (m, 2H), 3.54 (dd,  $J = 4.27$ , 1.22 Hz, 1H), 1.80 (s, 3H); <sup>13</sup>C{<sup>1</sup>H} NMR (CDCl<sub>3</sub>, 126 MHz):  $\delta$  133.5, 133, 131.6, 131.1, 130.4, 130.2, 129, 121.2, 121, 113.8, 100.2, 88.2, 79.4, 67.5, 61.9, 55.4, 42.9, 23.5; HRMS (ESI)  $m/z$  calcd for C<sub>21</sub>H<sub>21</sub>NO<sub>5</sub>S [M+H]<sup>+</sup> 400.1213, found 400.1205.

*3,3,12a-Trimethyl-5-(p-tolyl)-3,4,4a,12a-tetrahydro-2H,5H-benzo[4,5]isothiazolo[2,3-*a*]pyrano[3,2-*e*]pyridine 11,11-dioxide (6cf)*: Following the *General Procedure*, to the

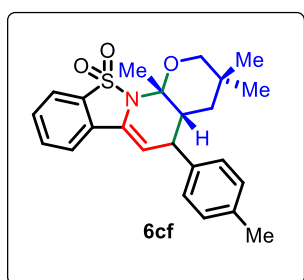

mixture of 3,3-dimethylhex-5-yn-1-ol (**1c**) (0.1 g, 0.792 mmol) and (*E*)-3-(4-methylstyryl)benzo[*d*]isothiazole 1,1-dioxide (**5f**) (0.223 g, 0.792 mmol) in anhydrous CH<sub>2</sub>Cl<sub>2</sub> (2 mL), Bi(OTf)<sub>3</sub> (0.051 g, 0.079 mmol) was added under argon atmosphere at room temperature (35 °C) and the reaction mixture was stirred for 8 h at rt. Purification of the crude product by column chromatography (SiO<sub>2</sub>, 30% EtOAc/hexanes) afforded 3,3,12a-trimethyl-5-(*p*-tolyl)-3,4,4a,12a-tetrahydro-2H,5H-benzo[4,5]isothiazolo[2,3-*a*]pyrano[3,2-*e*]pyridine 11,11-dioxide (**6cf**) dr. 1:0.1 (0.195 g, 60%) as an off-white solid. TLC:  $R_f = 0.70$  (SiO<sub>2</sub>, 15% EtOAc/hexanes); <sup>1</sup>H NMR (CDCl<sub>3</sub>, 400 MHz):  $\delta$  7.81 (d,  $J = 7.75$  Hz, 1H), 7.71 (d,  $J = 7.88$  Hz, 1H), 7.63 (td,  $J = 7.25$ , 1.13 Hz, 1H), 7.58-7.53 (m, 1H), 7.19-7.16 (m, 2H), 7.13-7.08 (m, 2H), 5.65 (dd,  $J = 2.38$ , 1.00 Hz, 1H), 4.18 (dd,  $J = 5.88$ , 2.38 Hz, 1H), 4.06 (d,  $J = 11.88$  Hz, 1H), 3.36 (dd,  $J = 11.63$ , 2.63 Hz, 1H), 2.37 (s, 3H), 2.18-2.08 (m, 1H), 1.94 (s, 3H), 1.14 (d,  $J = 13.3$  Hz, 1H), 0.91 (s, 3H), 0.73 (s, 3H), 0.68-0.64 (m, 1H); <sup>13</sup>C{<sup>1</sup>H} NMR (CDCl<sub>3</sub>, 101 MHz):  $\delta$  137.4, 136.7, 133.6, 132.9, 132.3, 130.1, 129.4, 129.2, 128.4, 121, 101, 91.1, 73.1, 42.7, 42.2, 34.2, 30.5, 27.4, 25.7, 23.7, 21.2; HRMS (ESI)  $m/z$  calcd for C<sub>24</sub>H<sub>27</sub>O<sub>3</sub>NS [M+H]<sup>+</sup> 410.1784, found 410.1779.

5-(2-Methoxyphenyl)-2,12a-dimethyl-3,4,4a,12a-tetrahydro-2H,5H-

benzo[4,5]isothiazolo[2,3-a]pyrano[3,2-e]pyridine 11,11-dioxide (**6di**): Following the

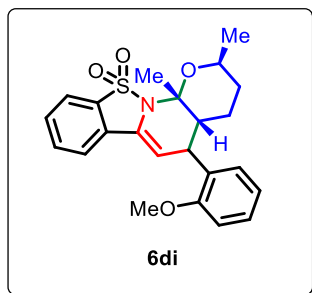

*General Procedure*, to the mixture of hept-6-yn-2-ol (**1d**) (0.1 g, 0.892 mmol) and (*E*)-3-(2-methoxystyryl)benzo[*d*]isothiazole 1,1-dioxide (**5i**) (0.266 g, 0.892 mmol) in anhydrous CH<sub>2</sub>Cl<sub>2</sub> (2 mL), Bi(OTf)<sub>3</sub> (0.058 g, 0.089 mmol) was added under argon atmosphere at room temperature (35 °C) and the reaction mixture was stirred for 8 h at rt. Purification of the crude product by

column chromatography (SiO<sub>2</sub>, 30% EtOAc/hexanes) afforded 5-(2-methoxyphenyl)-2,12a-dimethyl-3,4,4a,12a-tetrahydro-2H,5H-benzo[4,5]isothiazolo[2,3-a]pyrano[3,2-e]pyridine

11,11-dioxide (**6di**) (0.290 g, 79%) with dr. 2:1 as a white solid. TLC: *R<sub>f</sub>* = 0.60 (SiO<sub>2</sub>, 15% EtOAc/hexanes); <sup>1</sup>H NMR (CDCl<sub>3</sub>, 400 MHz): δ 7.79-7.69 (m, 3H), 7.66-7.58 (m, 1.43H), 7.53 (q, *J* = 7.84 Hz, 1.46H), 7.31-7.26 (m, 1H), 7.24-7.16 (m, 2H), 6.99-6.83 (m, 3H), 5.66 (d, *J* = 4.48 Hz, 0.5H); 5.61 (s, 1H), 4.63-4.55 (m, 1H), 4.47-4.31 (m, 1H), 3.89 (s, 1H), 3.86 (s, 3H), 2.17-2.05 (m, 2H), 1.92 (s, 3H), 1.72 (d, *J* = 11.13, Hz, 1H), 1.60-1.54 (m, 1H), 1.32 (dd, *J* = 12.88, 2.63 Hz, 1H), 1.25-1.21 (m, 4H), 0.91 (dd, *J* = 13.13, 3.25 Hz, 1H); <sup>13</sup>C{<sup>1</sup>H} NMR (CDCl<sub>3</sub>, 101 MHz): δ 157.1, 156.9, 133.6, 133.4, 132.8, 132.7, 132.1, 131.5, 130, 129.9, 129.4, 129.1, 128.9, 128.7, 128, 127.9, 121, 120.9, 120.7, 120.2, 120.1, 110.2, 101.4, 99.5, 91.8, 90.7, 69.1, 68.9, 55.4, 55.4, 46.8, 42.5, 40.9, 36.5, 33.3, 32.8, 28.9, 27, 25.9, 22, 21.4, 21.3; IR (KBr, cm<sup>-1</sup>): ν 3175, 3145, 3077, 2933, 1705, 1661, 1593, 1532, 1458, 1307, 1241, 1169, 1075, 1023, 916, 833, 752, 647; M. P: 197.4 °C ; HRMS (ESI) *m/z* calcd for C<sub>23</sub>H<sub>25</sub>O<sub>4</sub>NS [M+H]<sup>+</sup> 412.1577, found 412.1571.

5-(4-Methoxyphenyl)-2,12a-dimethyl-3,4,4a,12a-tetrahydro-2H,5H-

benzo[4,5]isothiazolo[2,3-a]pyrano[3,2-e]pyridine 11,11-dioxide (**6dj**): Following the

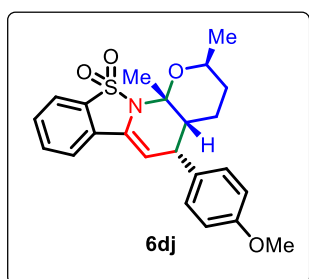

*General Procedure*, to the mixture of hept-6-yn-2-ol (**1d**) (0.1 g, 0.892 mmol) and (*E*)-3-(4-methoxystyryl)benzo[*d*]isothiazole 1,1-dioxide (**5j**) (0.266 g, 0.892 mmol) in anhydrous CH<sub>2</sub>Cl<sub>2</sub> (2 mL), Bi(OTf)<sub>3</sub> (0.058 g, 0.089 mmol) was added under argon atmosphere at room temperature (35 °C) and reaction mixture was stirred for 8 h at rt. Purification of the crude product by column

chromatography (SiO<sub>2</sub>, 30% EtOAc/hexanes) afforded 5-(4-methoxyphenyl)-2,12a-dimethyl-3,4,4a,12a-tetrahydro-2H,5H-benzo[4,5]isothiazolo[2,3-a]pyrano[3,2-e]pyridine 11,11-dioxide (**6dj**) (0.299 g, 81%) as a white crystal. **6dj** was confirmed by <sup>1</sup>H NMR, <sup>13</sup>C NMR,



DEPT, and XRD analysis;<sup>20</sup> TLC:  $R_f = 0.60$  (SiO<sub>2</sub>, 15% EtOAc/hexanes); <sup>1</sup>H NMR (CDCl<sub>3</sub>, 500 MHz):  $\delta$  7.82 - 7.52 (m, 6H), 7.23 - 7.11 (m, 3H), 6.95-6.81 (m, 3H), 5.62 (dd,  $J = 2.38$ , 1.13 Hz, 1 H), 4.49-4.36 (m, 1H), 4.16 (dd,  $J = 5.82$ , 2.31 Hz, 1 H), 3.85-3.81 (m, 3H), 3.79 (s, 3H), 1.90 (s, 4H), 1.86-1.80 (m, 2H), 1.65-1.53 (m, 3H), 1.26-1.21 (m, 4H), 1.04-0.94 (m, 2H); <sup>13</sup>C{<sup>1</sup>H} NMR (CDCl<sub>3</sub>, 101 MHz):  $\delta$  158.7, 133.6, 132.8, 132.8, 132.2, 130.1, 129.5, 129.1, 121.0, 120.9, 114.0, 113.9, 100.9, 99.1, 91.8, 90.3, 69.3, 55.4, 49.4, 46.4, 45.0, 42.1, 32.8, 27.1, 26.1, 21.6, 21.4; IR (KBr, cm<sup>-1</sup>):  $\nu$  3146, 3074, 2952, 1722, 1603, 1458, 1373, 1260, 1174, 1127, 1038, 978, 831, 698; HRMS (ESI)  $m/z$  calcd for C<sub>23</sub>H<sub>25</sub>O<sub>4</sub>NS [M+H]<sup>+</sup> 412.1577, found 412.1574.

5-(4-Methoxyphenyl)-2,12a-dimethyl-2,3,4a,12a-tetrahydro-5H-benzo[4,5]isothiazolo [2,3-a][1,4]dioxino[2,3-e]pyridine 11,11-dioxide and 5-(4-methoxyphenyl)-3,12a-dimethyl - 2,3,4a,12a-tetrahydro-5H-benzo[4,5]isothiazolo[2,3-a][1,4]dioxino[2,3-e]pyridine 11,11-dioxide (**6ej** & **6ej'**): Following the *General Procedure*, to the mixture of 1-(prop-2-yn-1-

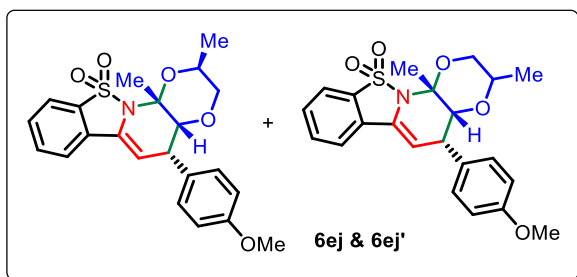

oxy)propan-2-ol (**1e**) (0.1 g, 0.876 mmol) and (E)-3-(2-methoxystyryl)benzo[d]isothiazole 1,1-dioxide (**5j**) (0.262 g, 0.876 mmol) in anhydrous CH<sub>2</sub>Cl<sub>2</sub> (2 mL), Bi(OTf)<sub>3</sub> (0.057 g, 0.087 mmol) was added under argon

atmosphere at room temperature (35 °C) and reaction mixture was stirred for 8 h at rt. Purification of the crude product by column chromatography (SiO<sub>2</sub>, 30% EtOAc/hexanes) afforded 5-(2-methoxyphenyl)-2,12a-dimethyl-3,4,4a,12a-tetrahydro-2H,5H-benzo[4,5]isothiazolo[2,3-a]pyrano[3,2-e]pyridine 11,11-dioxide and 5-(4-methoxyphenyl)-3,12a-dimethyl - 2,3,4a,12a-tetrahydro-5H-benzo[4,5]isothiazolo[2,3-a][1,4]dioxino[2,3-e]pyridine 11,11-dioxide (**6ej** and **6ej'**) (0.219 g, 60%) as a 1:0.6 mixture as an off-white solid. TLC:  $R_f = 0.80$  (SiO<sub>2</sub>, 15% EtOAc/hexanes); <sup>1</sup>H NMR (CDCl<sub>3</sub>, 500 MHz):  $\delta$  7.83-7.77 (m, 1.56H), 7.73-7.67 (m, 1.65H), 7.61(t,  $J = 7.44$  Hz, 1.58H), 7.57-7.52 (m, 1.55H), 7.32-7.27 (m, 3H), 7.00-6.94 (m, 1H), 6.94-6.90 (m, 1.6H), 5.58 (dd,  $J = 2.29$ , 1.14 Hz, 1H), 5.56-5.54 (m, 0.5H), 4.65 (ddd,  $J = 10.68$ , 6.48, 3.05, Hz, 1H), 4.60-4.54 (m, 1.54H), 4.18-4.12 (m, 1H), 3.91-3.86 (m, 5H), 3.72-3.69 (m, 2H), 3.66-3.61 (m, 1H), 3.20 (t,  $J = 11.44$  Hz, 1H), 1.86-1.77 (m, 5H), 1.13 (d,  $J = 6.10$  Hz, 3H); 0.94 (d,  $J = 6.10$  Hz, 1.69H); <sup>13</sup>C{<sup>1</sup>H} NMR (CDCl<sub>3</sub>, 126 MHz):  $\delta$  156.8, 133.4, 132.9, 131.9, 131.4, 130.8, 130, 129.9, 129.1, 128.4, 128.1, 127.3, 121.1, 120.9, 120.5, 120.3, 110.1, 110, 100.9, 100.1, 88.6, 87.4, 76.4, 73,

72.2, 67.3, 66.7, 55.6, 36.5, 36.3, 23.5, 23.1, 16.7, 16.3; HRMS (ESI)  $m/z$  calcd for  $C_{22}H_{23}O_5NS$   $[M+H]^+$  414.1370, found 414.1367.

*5-(4-Methoxyphenyl)-12a-methyl-1,3a,4,4a,12a,13a-hexahydro-2H,5H-benzo[4,5]isothiazolo[2,3-a]furo[2',3':5,6]pyrano[3,2-e]pyridin-2-one 11,11-dioxide (6fj):*

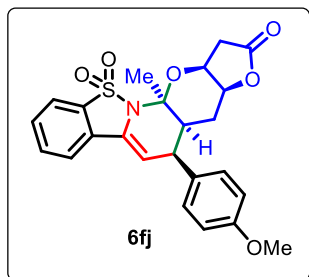

Following the *General Procedure*, to the mixture of (4*R*,5*S*)-5-(but-3-yn-1-yl)-4-hydroxydihydrofuran-2(3*H*)-one (**1f**) (0.1 g, 0.648 mmol) and (*E*)-3-(4-methoxystyryl)benzo[*d*]isothiazole 1,1-dioxide (**5j**) (0.073 g, 0.648 mmol) in anhydrous  $CH_2Cl_2$  (2 mL),  $Bi(OTf)_3$  (0.042 g, 0.064 mmol) was added under argon atmosphere at room temperature (35 °C) and reaction mixture was stirred for 8 h at rt. Purification of the crude product by column chromatography ( $SiO_2$ , 30% EtOAc/hexanes) afforded 5-(4-methoxyphenyl)-12a-methyl-1,3a,4,4a,12a,13a-hexahydro-2*H*,5*H*-benzo[4,5]isothiazolo[2,3-*a*]furo[2',3':5,6]pyrano[3,2-*e*]pyridin-2-one 11,11-dioxide (**6fj**) (0.173 g, 59%) as a white solid. TLC:  $R_f$  = 0.40 ( $SiO_2$ , 15% EtOAc/hexanes);  $^1H$  NMR ( $CDCl_3$ , 400 MHz):  $\delta$  7.82 (d,  $J$  = 7.63 Hz, 1H), 7.76-7.72 (m, 1H), 7.67 (td,  $J$  = 7.57, 1.25 Hz, 1H), 7.62-7.57 (m, 1H), 7.18-7.09 (m, 2H), 6.95-6.87 (m, 2H), 5.72 (d,  $J$  = 2.44, 1.19 Hz, 1H), 5.17 (q,  $J$  = 2.50, Hz, 1H), 4.42 (q,  $J$  = 3.00, Hz, 1H), 4.22 (dd,  $J$  = 5.75, 2.38 Hz, 1H), 3.83 (s, 3H), 2.74 (d,  $J$  = 2.50 Hz, 2H), 2.27-2.16 (m, 1H), 1.87 (s, 3H), 1.59-1.57 (m, 1H), 1.55-1.51 (m, 1H);  $^{13}C\{^1H\}$  NMR ( $CDCl_3$ , 101 MHz):  $\delta$  176.1, 159, 133.3, 132.4, 131.1, 130.5, 129.4, 129, 121.2, 121.1, 114.3, 101.4, 90.3, 77.5, 69.9, 55.5, 41.3, 39, 38.7, 25.1, 22.6; IR (KBr,  $cm^{-1}$ ):  $\nu$  3144, 3037, 2924, 1781, 1702, 1653, 1510, 1464, 1307, 1248, 1180, 1105, 1047, 935, 832, 698; HRMS (ESI)  $m/z$  calcd for  $C_{24}H_{23}O_6NS$   $[M+H]^+$  454.1319, found 454.1314.

## **9. Synthesis and characterization of fused-*N,O*-ketals (7) from 4-pentyn-1-ols (2) and cyclic *N*-sulfonyl ketimines (5):**

*11a-Methyl-4-phenyl-2,3,3a,11a-tetrahydro-4H-benzo[4,5]isothiazolo[2,3-a]furo[3,2-*e*]pyridine 10,10-dioxide (7aa):* Following the *General Procedure*, to the mixture of 4-pentyn-1-ol (**2a**) (0.1 g, 1.18 mmol) and (*E*)-3-styrylbenzo[*d*]isothiazole 1,1-dioxide (**5a**) (0.317 g, 1.18 mmol) in anhydrous  $CH_2Cl_2$  (2 mL),  $Bi(OTf)_3$  (0.077 g, 0.118 mmol) was added under argon atmosphere at room temperature (35 °C) and reaction mixture was stirred for 8 h at rt. Purification of the crude product by column chromatography ( $SiO_2$ , 30%



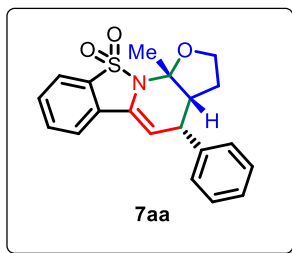

EtOAc/hexanes) afforded 4-([1,1'-biphenyl]-4-yl)-11a-methyl-2,3,3a,11a-tetrahydro-4H-benzo[4,5]isothiazolo[2,3-a]furo[3,2-e]pyridine 10,10-dioxide (**7aa**) (0.299 g, 71%) as an off-white solid. TLC:  $R_f$  = 0.60 (SiO<sub>2</sub>, 15% EtOAc/hexanes); <sup>1</sup>H NMR (CDCl<sub>3</sub>, 500 MHz): δ 7.81 (d,  $J$  = 7.63 Hz, 1H), 7.70 (d,  $J$  = 7.63 Hz, 1H), 7.63 - 7.59 (m, 1H), 7.58-7.54 (m, 1H), 7.38-7.34 (m, 2H), 7.31-7.27 (m, 3H), 5.61 (d,  $J$  = 1.53 Hz, 1H), 4.39-4.31 (m, 1H), 4.15 (dd,  $J$  = 6.10, 2.29 Hz, 1H), 3.95 (q,  $J$  = 8.52 Hz, 1H), 2.49-2.40 (m, 1H), 2.01-1.93 (m, 1H), 1.92 (s, 3H), 1.45-1.38 (m, 1H); <sup>13</sup>C{<sup>1</sup>H} NMR (CDCl<sub>3</sub>, 126 MHz): δ 141.7, 134.1, 132.7, 130.7, 130.2, 128.9, 128.7, 127.9, 127.3, 121.1, 120.9, 98.5, 95.2, 67.3, 52, 40.3, 26.6, 22.9; HRMS (ESI)  $m/z$  calcd for C<sub>20</sub>H<sub>19</sub>O<sub>3</sub>NS [M+H]<sup>+</sup> 354.1158 found 354.1155.

*11a-Methyl-4-(naphthalen-2-yl)-2,3,3a,11a-tetrahydro-4H-benzo[4,5]isothiazolo[2,3-a]furo[3,2-e]pyridine 10,10-dioxide (7ac)*: Following the *General Procedure*, to the mixture

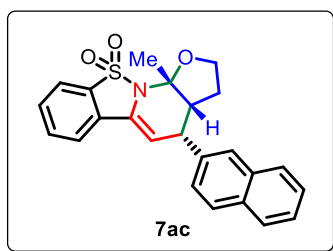

of 4-pentyn-1-ol (**2a**) (0.1 g, 1.18 mmol) and (*E*)-3-(2-(naphthalen-2-yl)vinyl)benzo[*d*]isothiazole 1,1-dioxide (**5c**) (0.379 g, 1.18 mmol) in anhydrous CH<sub>2</sub>Cl<sub>2</sub> (2 mL), Bi(OTf)<sub>3</sub> (0.077 g, 0.118 mmol) was added under argon atmosphere at room temperature (35 °C) and reaction mixture was stirred for 8 h at rt. Purification of the crude product by column chromatography (SiO<sub>2</sub>, 30% EtOAc/hexanes) afforded 11a-methyl-4-(naphthalen-2-yl)-2,3,3a,11a-tetrahydro-4H-benzo[4,5]isothiazolo[2,3-a]furo[3,2-e]pyridine 10,10-dioxide (**7ac**) (0.360 g, 75%) as an off-white solid. TLC:  $R_f$  = 0.60 (SiO<sub>2</sub>, 15% EtOAc/hexanes); <sup>1</sup>H NMR (400 MHz, CDCl<sub>3</sub>) δ 7.87-7.80 (m, 4H), 7.76 (d,  $J$  = 7.75 Hz, 1H), 7.73 (s, 1H), 7.64 (dt,  $J$  = 1.13, 7.50 Hz, 1H), 7.60-7.54 (m, 1H), 7.51-7.47 (m, 2H), 7.41 (dd,  $J$  = 1.75, 8.50 Hz, 1H), 5.73 (dd,  $J$  = 1.00, 2.50 Hz, 1H), 4.42-4.28 (m, 2H), 3.94 (q,  $J$  = 8.38 Hz, 1H), 2.60-2.51 (m, 1H), 2.08-1.98 (m, 1H), 1.96 (s, 3H), 1.62 (s, 2H), 1.44-1.34 (m, 1H); <sup>13</sup>C{<sup>1</sup>H} NMR (101 MHz, CDCl<sub>3</sub>) δ 139.2, 134.1, 133.6, 132.8, 132.7, 130.9, 130.3, 128.7, 128.6, 127.8, 127.8, 126.5, 126.3, 126.2, 126.0, 121.2, 120.9, 98.5, 95.3, 67.3, 51.9, 40.4, 26.7, 22.9; HRMS (ESI):  $m/z$  calcd for C<sub>24</sub>H<sub>22</sub>O<sub>3</sub>NS [M+H]<sup>+</sup> 404.1315, found 404.1313.

*4-([1,1'-Biphenyl]-4-yl)-11a-methyl-2,3,3a,11a-tetrahydro-4H-benzo[4,5]isothiazolo[2,3-a]furo[3,2-e]pyridine 10,10-dioxide (7ae)*: Following the *General Procedure*, to the mixture of 4-pentyn-1-ol (**2a**) (0.1 g, 1.18 mmol) and (*E*)-3-(2-([1,1'-biphenyl]-4-

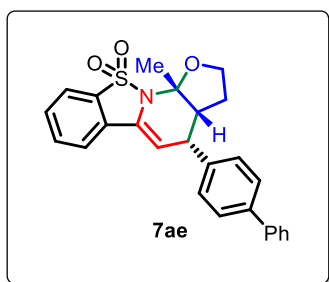

yl)vinyl)benzo[*d*]isothiazole 1,1-dioxide (**5e**) (0.450 g, 1.18 mmol) in anhydrous CH<sub>2</sub>Cl<sub>2</sub> (2 mL), Bi(OTf)<sub>3</sub> (0.077 g, 0.118 mmol) was added under argon atmosphere at room temperature (35 °C) and reaction mixture was stirred for 8 h at rt. Purification of the crude product by column chromatography (SiO<sub>2</sub>, 30% EtOAc/hexanes) afforded 4-([1,1'-biphenyl]-4-yl)-11a-methyl-2,3,3a,11a-tetrahydro-4*H*-benzo[4,5]isothiazolo[2,3-*a*]furo[3,2-*e*]pyridine 10,10-dioxide (**7ae**) (0.331 g, 65%) as an off-white solid. TLC: *R*<sub>f</sub> = 0.60 (SiO<sub>2</sub>, 15% EtOAc/hexanes); <sup>1</sup>H NMR (CDCl<sub>3</sub>, 400 MHz): δ 7.82 (d, *J* = 7.63 Hz, 1H), 7.72 (d, *J* = 7.63 Hz, 1H), 7.65 - 7.55 (m, 6H), 7.49-7.42 (m, 2H), 7.39-7.33 (m, 3H), 5.64 (d, *J* = 1.75 Hz, 1H), 4.44-4.34 (m, 1H), 4.20 (dd, *J* = 6.19, 2.31 Hz, 1H), 3.98 (q, *J* = 8.46 Hz, 1H), 2.55-2.47 (m, 1H), 2.06-1.94 (m, 1H), 1.94 (s, 3H), 0.88-0.84 (m, 1H); <sup>13</sup>C{<sup>1</sup>H} NMR (CDCl<sub>3</sub>, 126 MHz): δ 140.8, 140.7, 140.3, 134.1, 132.7, 130.8, 130.3, 129, 128.7, 128.3, 127.6, 127.2, 121.2, 120.9, 98.5, 95.3, 67.4, 51.9, 40.1, 26.6, 22.9; HRMS (ESI) *m/z* calcd for C<sub>26</sub>H<sub>23</sub>O<sub>3</sub>NS [M+H]<sup>+</sup> 430.1471, found 430.1470.

4-(2-Methoxyphenyl)-11a-methyl-2,3,3a,11a-tetrahydro-4*H*-benzo[4,5]isothiazolo[2,3-*a*]furo[3,2-*e*]pyridine 10,10-dioxide (**7ai**): Following the *General Procedure*, to the mixture of 4-pentyn-1-ol (**2a**) (0.1 g, 1.18 mmol) and (*E*)-3-(2-methoxystyryl)benzo[*d*]isothiazole 1,1-dioxide (**5i**) (0.355 g, 1.18 mmol) in anhydrous CH<sub>2</sub>Cl<sub>2</sub> (2 mL), Bi(OTf)<sub>3</sub> (0.077 g, 0.118 mmol) was added under argon atmosphere at room temperature (35 °C) and reaction mixture was stirred for 8 h at rt. Purification of the crude product by column chromatography (SiO<sub>2</sub>, 30% EtOAc/hexanes)

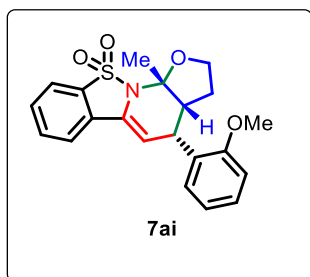

4-(2-methoxyphenyl)-11a-methyl-2,3,3a,11a-tetrahydro-4*H*-benzo[4,5]isothiazolo[2,3-*a*]furo[3,2-*e*]pyridine 10,10-dioxide (**7ai**) (0.354 g, 78%) as an off-white solid. TLC: *R*<sub>f</sub> = 0.60 (SiO<sub>2</sub>, 15% EtOAc/hexanes) **7ai** was confirmed by <sup>1</sup>H NMR, <sup>13</sup>C NMR, DEPT, and 2D analysis;<sup>20</sup> <sup>1</sup>H NMR (CDCl<sub>3</sub>, 400 MHz): δ 7.81 (d, *J* = 7.75 Hz, 1H), 7.70 (d, *J* = 7.75 Hz, 1H), 7.65 - 7.52 (m, 2H), 7.29 (s, 1H), 7.21 (d, *J* = 7.50 Hz, 1H), 6.97-6.88 (m, 2H), 5.57 (d, *J* = 2.25 Hz, 1H), 4.55 (dd, *J* = 6.13, 2.50 Hz, 1H), 4.37-4.30 (m, 1H), 3.95 (q, *J* = 8.59 Hz, 1H), 3.88 (s, 3H), 2.78-2.66 (m, 1H), 1.92 (s, 3H), 0.87-0.84 (m, 2H); <sup>13</sup>C{<sup>1</sup>H} NMR (CDCl<sub>3</sub>, 101 MHz): δ 156.9, 134 132.6, 130.5, 130.3, 128.3, 128.3, 121.1, 120.9, 120.7, 110.3, 99.5, 95.3, 67.4, 55.6, 48.5, 26.9, 22.8; IR (KBr, cm<sup>-1</sup>): ν 3200, 3143,

2927, 1705, 1651, 1605, 1465, 1304, 1242, 1174, 1025, 962, 896, 752, 695; HRMS (ESI)  $m/z$  calcd for  $C_{21}H_{21}O_4NS$   $[M+H]^+$  384.1264, found 384.1257.

4-(4-Methoxyphenyl)-2,11a-dimethyl-2,3,3a,11a-tetrahydro-4H-benzo[4,5]isothiazolo[2,3-a]furo[3,2-e]pyridine 10,10-dioxide (**7bj**): Following the *General Procedure*, to the mixture

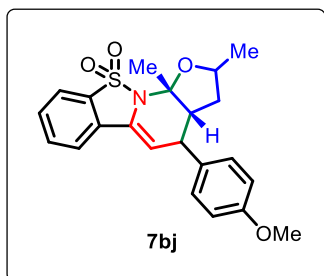

of hex-5-yn-2-ol (**2b**) (0.1 g, 1.01 mmol) and (*E*)-3-(4-methoxystyryl)benzo[*d*]isothiazole 1,1-dioxide (**5j**) (0.304 g, 1.01 mmol) in anhydrous  $CH_2Cl_2$  (2 mL),  $Bi(OTf)_3$  (0.066 g, 0.101 mmol) was added under argon atmosphere at room temperature (35 °C) and reaction mixture was stirred for 8 h at rt.

Purification of the crude product by column chromatography ( $SiO_2$ , 30% EtOAc/hexanes) afforded 4-(4-methoxyphenyl)-2,11a-dimethyl-2,3,3a,11a-tetrahydro-4H-benzo[4,5]isothiazolo[2,3-a]furo[3,2-e]pyridine 10,10-dioxide (**7bj**) (0.285 g, 70%) with dr (1:0.3) as an off-white solid. TLC:  $R_f$  = 0.60 ( $SiO_2$ , 15% EtOAc/hexanes);  $^1H$  NMR ( $CDCl_3$ , 400 MHz):  $\delta$  7.83-7.51 (m, 6H), 7.23-7.12 (m, 3H), 6.93-6.86 (m, 3H), 5.70-5.63 (m, 0.3H), 5.56 (d,  $J$  = 1.63 Hz, 1H), 4.71-4.63 (m, 1H), 4.08 (dd,  $J$  = 6.13, 2.38 Hz, 1H), 3.82 (s, 3H), 2.54-2.44 (m, 1H), 2.14-1.97 (m, 1H), 1.91-1.87 (m, 3H), 1.19 (d,  $J$  = 6.38 Hz, 4H), 1.10-1.00 (m, 1H);  $^{13}C\{^1H\}$  NMR ( $CDCl_3$ , 101 MHz):  $\delta$  158.8, 134.1, 133.8, 132.7, 132.7, 130.8, 130.2, 130.2, 129.2, 129.1, 128.9, 128.9, 128.8, 121.1, 120.9, 114.3, 114.2, 114.1, 98.9, 95.8, 74.6, 55.5, 50.9, 39.4, 33.3, 23.3, 22.6; IR (KBr,  $cm^{-1}$ ):  $\nu$  3267, 3194, 3143, 3076, 2931, 1728, 1655, 1607, 1513, 1460, 1305, 1246, 1175, 1115, 1031, 957, 896, 753; HRMS (ESI)  $m/z$  calcd for  $C_{22}H_{23}O_4NS$   $[M+H]^+$  398.1421, found 398.1417.

4-(4-Methoxyphenyl)-2,2,11a-trimethyl-2,3,3a,11a-tetrahydro-4H-benzo[4,5]isothiazolo[2,3-a]furo[3,2-e]pyridine 10,10-dioxide (**7cf**): Following the *General Procedure*, to the mixture

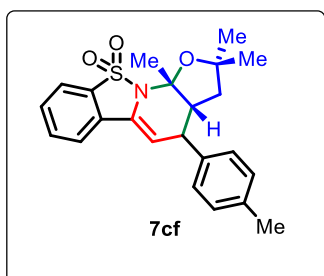

of 2-methylhex-5-yn-2-ol (**2c**) (0.1 g, 0.892 mmol) and (*E*)-3-(4-methylstyryl)benzo[*d*]isothiazole 1,1-dioxide (**5f**) (0.252 g, 0.892 mmol) in anhydrous  $CH_2Cl_2$  (2 mL),  $Bi(OTf)_3$  (0.058 g, 0.089 mmol) was added under argon atmosphere at room temperature (35 °C) and reaction mixture was stirred for 8 h at rt. Purification

of the crude product by column chromatography ( $SiO_2$ , 30% EtOAc/hexanes) afforded 4-(4-methoxyphenyl)-2,2,11a-trimethyl-2,3,3a,11a-tetrahydro-4H-benzo[4,5]isothiazolo[2,3-a]furo[3,2-e]pyridine 10,10-dioxide (**7cf**) (0.253 g, 71%) with dr. 1:0.3 as an off-white solid. TLC:  $R_f$  = 0.60 ( $SiO_2$ , 15% EtOAc/hexanes);  $^1H$  NMR ( $CDCl_3$ ,

400 MHz):  $\delta$  7.83 - 7.78 (m, 1H), 7.70 - 7.66 (m, 1H), 7.64-7.51 (m, 3H), 7.20-7.12 (m 5H), 5.61 (d,  $J$  = 2.25 Hz, 1H), 5.70 (d,  $J$  = 4.63 Hz, 0.3H), 4.10 (dd,  $J$  = 6.63, 2.63 Hz, 1H), 2.70-2.59 (m, 1H), 2.39-2.32 (m, 4H), 2.17-2.10 (m, 1H), 1.94-1.90 (m, 3H), 1.25 (s, 6H), 1.19 (s, 4H), 0.92-0.79 (m, 2H);  $^{13}\text{C}\{^1\text{H}\}$  NMR ( $\text{CDCl}_3$ , 101 MHz):  $\delta$  138.8, 136.9, 134.1, 132.8, 132.7, 130.9, 130.2, 129.5, 128.8, 127.9, 121.1, 120.9, 99.6, 95.6, 83.5, 51.7, 39.9, 39.8, 29.7, 29.4, 24.7, 21.2; HRMS (ESI)  $m/z$  calcd for  $\text{C}_{23}\text{H}_{25}\text{NO}_3\text{S}$   $[\text{M}+\text{H}]^+$  398.1628, found 398.1619.

## **10. Synthesis and characterization of spiro-*N,O*-ketals (8) from 4-pentyn-1-ols (2) and cyclic *N*-sulfonyl ketimines (5):**

*9-(Naphthalen-2-yl)-8,9-dihydro-3'H,5'H-dispiro[benzo[4,5]isothiazolo[2,3-a]pyridine-7,2'-furan-4',1''-cyclopentane] 5,5-dioxide (8dc)*: Following the *General Procedure*, to the

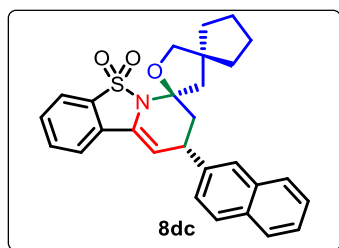

mixture of (1-(prop-2-yn-1-yl)cyclopentyl)methanol (**2d**) (0.1 g, 0.724 mmol) and (*E*)-3-(2-(naphthalen-2-yl)vinyl)benzo[*d*]isothiazole 1,1-dioxide (**5c**) (0.230 g, 0.724 mmol) in anhydrous  $\text{CH}_2\text{Cl}_2$  (2 mL),  $\text{Bi}(\text{OTf})_3$  (0.047 g, 0.072 mmol) was added under argon atmosphere at room temperature

(35 °C) and reaction mixture was stirred for 8 h at rt. Purification of the crude product by column chromatography ( $\text{SiO}_2$ , 30% EtOAc/hexanes) afforded 9-(naphthalen-2-yl)-8,9-dihydro-3'H,5'H-dispiro[benzo[4,5]isothiazolo[2,3-a]pyridine-7,2'-furan-4',1''-cyclopentane] 5,5-dioxide (**8dc**) (0.264 g, 80%) as a yellow semi-solid. TLC:  $R_f$  = 0.60 ( $\text{SiO}_2$ , 15% EtOAc/hexanes);  $^1\text{H}$  NMR ( $\text{CDCl}_3$ , 400 MHz):  $\delta$  7.87-7.79 (m, 4H), 7.77 (s, 1H), 7.70 - 7.66 (m, 1H), 7.64-7.53 (m, 2H), 7.51-7.41 (m, 3H), 5.87 (m, 1H), 4.27-4.16 (m, 2H), 3.92 (d,  $J$  = 8.50, Hz, 1H), 3.45 (d,  $J$  = 6.38 Hz, 1H), 3.25 (d,  $J$  = 14.76 Hz, 1H), 2.31 (d,  $J$  = 12.51 Hz, 1H), 2.14 (d,  $J$  = 14.88 Hz, 1H), 1.80-1.67 (m, 4H), 1.57-1.50 (m, 4H);  $^{13}\text{C}\{^1\text{H}\}$  NMR ( $\text{CDCl}_3$ , 101 MHz):  $\delta$  140.9, 133.6, 132.9, 132.6, 132.4, 131.5, 130, 129.2, 128.6, 127.7, 127.6, 126.3, 126.2, 126.1, 125.8, 120.9, 104.9, 94.1, 68.8, 46.7, 44.1, 37.4, 36.8, 35.25.9, 25.8, 24.4, 23.1; IR (KBr,  $\text{cm}^{-1}$ ):  $\nu$  3065, 2924, 1699, 1632, 1536, 1455, 1455, 1301, 1238, 1170, 1020, 748; HRMS (ESI)  $m/z$  calcd for  $\text{C}_{28}\text{H}_{27}\text{O}_3\text{NS}$   $[\text{M}+\text{H}]^+$  458.1784, found 458.1770.

*9-(p-Tolyl)-8,9-dihydro-3'H,5'H-dispiro[benzo[4,5]isothiazolo[2,3-a]pyridine-7,2'-furan-4',1''-cyclopentane] 5,5-dioxide (8df)*: Following the *General Procedure*, to the mixture of (1-(prop-2-yn-1-yl)cyclopentyl)methanol (**2d**) (0.1 g, 0.724 mmol) and (*E*)-3-(4-

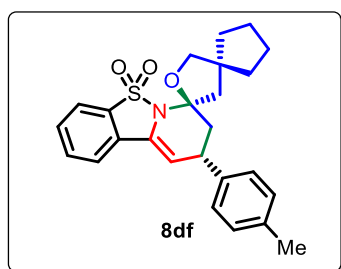

methylstyryl)benzo[*d*]isothiazole 1,1-dioxide (**5f**) (0.194 g, 0.724 mmol) in anhydrous CH<sub>2</sub>Cl<sub>2</sub> (2 mL), Bi(OTf)<sub>3</sub> (0.047 g, 0.072 mmol) was added under argon atmosphere at room temperature (35 °C) and reaction mixture was stirred for 8 h at rt. Purification of the crude product by column chromatography (SiO<sub>2</sub>, 30% EtOAc/hexanes) afforded 9-(*p*-tolyl)-8,9-dihydro-

3'*H*,5'*H*-dispiro[benzo[4,5]isothiazolo[2,3-*a*]pyridine-7,2'-furan-4',1''-cyclopentane] 5,5-dioxide (**8df**) (0.240 g, 78%) as a yellow semi-solid. TLC: *R*<sub>f</sub> = 0.60 (SiO<sub>2</sub>, 15% EtOAc/hexanes); <sup>1</sup>H NMR (CDCl<sub>3</sub>, 400 MHz): δ 7.77 (d, *J* = 7.63, Hz, 1H), 7.67-7.49 (m, 3H), 7.22-7.13 (m, 4H), 5.76 (m, 1H), 4.16 (d, *J* = 8.50, Hz, 1H), 4.00 (ddd, *J* = 12.35, 5.66, 2.25 Hz, 1H), 3.87 (d, *J* = 8.50, Hz, 1H), 3.21 (d, *J* = 14.76, Hz, 1H), 2.35 (s, 3H), 2.31-2.23 (m, 1H) 2.20-2.07 (m, 2H), 1.69-1.60 (m, 2H), 1.54-1.42 (m, 6H); <sup>13</sup>C{<sup>1</sup>H} NMR (CDCl<sub>3</sub>, 101 MHz): δ 140.6, 136.8, 133, 132.5, 131.4, 130, 129.6, 129.4, 127.7, 121, 120.9, 105.5, 94.3, 78.3, 46.9, 44.2, 37, 36.8, 35.1, 26.1, 24.5, 23.2, 21.2; IR (KBr, cm<sup>-1</sup>): ν 3065, 2924, 1699, 1632, 1536, 1455, 1455, 1301, 1238, 1170, 1020, 748; HRMS (ESI) *m/z* calcd for C<sub>25</sub>H<sub>27</sub>O<sub>3</sub>NS [M+H]<sup>+</sup> 422.1784, found 422.1778.

9-(4-Methoxyphenyl)-8,9-dihydro-3'*H*,5'*H*-dispiro[benzo[4,5]isothiazolo[2,3-*a*]pyridine-7,2'-furan-4',1''-cyclopentane] 5,5-dioxide (**8dj**): Following the *General Procedure*, to the mixture

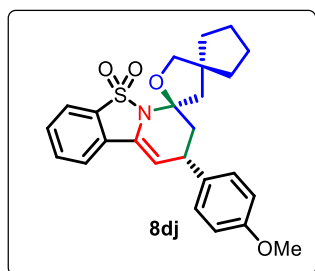

of (1-(prop-2-yn-1-yl)cyclopentyl)methanol (**2d**) (0.1 g, 0.724 mmol) and (*E*)-3-(4-methoxystyryl)benzo[*d*]isothiazole 1,1-dioxide (**5j**) (0.215 g, 0.724 mmol) in anhydrous CH<sub>2</sub>Cl<sub>2</sub> (2 mL) Bi(OTf)<sub>3</sub> (0.047 g, 0.072 mmol) was added under argon atmosphere at room temperature (35 °C) and reaction mixture was stirred for 8 h at rt. Purification of the crude product by column

chromatography (SiO<sub>2</sub>, 30% EtOAc/hexanes) afforded 9-(4-methoxyphenyl)-8,9-dihydro-3'*H*,5'*H*-dispiro[benzo[4,5]isothiazolo[2,3-*a*]pyridine-7,2'-furan-4',1''-cyclopentane] 5,5-dioxide (**8dj**) (0.260 g, 82%) with dr 1:3 as a yellow solid. TLC: *R*<sub>f</sub> = 0.60 (SiO<sub>2</sub>, 15% EtOAc/hexanes); <sup>1</sup>H NMR (CDCl<sub>3</sub>, 400 MHz): δ 7.77 (td, *J* = 1.0, 7.7 Hz, 2H), 7.65-7.45 (m, 5H), 7.24-7.18 (m, 3H), 6.92-6.83 (m, 3H), 5.80-5.73 (m, 2H), 4.26-4.13 (m, 2H), 3.99 (ddd, *J* = 2.5, 5.7, 12.3 Hz, 2H), 3.87 (d, *J* = 8.5 Hz, 1H), 3.83-3.80 (m, 5H), 3.80-3.73 (m, 2H), 3.49 (d, *J* = 14.4 Hz, 1H), 3.21 (d, *J* = 14.8 Hz, 0.5H), 2.37-2.23 (m, 2H), 2.17-2.07 (m, 3H), 1.90-1.61 (m, 11H), 1.59-1.42 (m, 7H); <sup>13</sup>C{<sup>1</sup>H} NMR (CDCl<sub>3</sub>, 101 MHz): δ 158.6, 135.5, 135.5, 132.8, 132.8, 132.3, 131.2, 129.8, 129.2, 129.2, 128.6, 120.8, 120.8, 120.7,

114.1, 105.5, 105.4, 94.2, 94.1, 78.8, 55.3, 50.8, 46.8, 46.1, 45.9, 44.0, 39.5, 36.6, 36.4, 36.2, 34.9, 34.8, 29.5, 25.8, 25.8, 24.8, 24.3, 24.2, 23.0; IR (KBr,  $\text{cm}^{-1}$ ):  $\nu$  3068, 2935, 1725, 1653, 1603, 1511, 1456, 1456, 1303, 1245, 1171, 1029, 832, 746; HRMS (ESI)  $m/z$  calcd for  $\text{C}_{25}\text{H}_{27}\text{O}_4\text{NS}$   $[\text{M}+\text{H}]^+$  438.1734, found 438.1719.

*9-(Naphthalen-2-yl)-8,9-dihydro-3'H,5'H-dispiro[benzo[4,5]isothiazolo[2,3-a]pyridine-7,2'-furan-4',1''-cyclohexane] 5,5-dioxide (8ec)*: Following the *General Procedure*, to the mixture

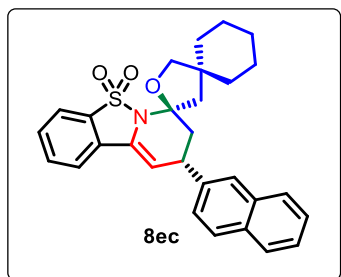

of (1-(prop-2-yn-1-yl)cyclohexyl)methanol (**2e**) (0.1 g, 0.657 mmol) and (*E*)-3-(2-(naphthalen-2-yl)vinyl)benzo[*d*]isothiazole 1,1-dioxide (**5c**) (0.207 g, 0.657 mmol) in anhydrous  $\text{CH}_2\text{Cl}_2$  (2 mL),  $\text{Bi}(\text{OTf})_3$  (0.042 g, 0.065 mmol) was added under argon atmosphere at room temperature (35  $^\circ\text{C}$ ) and reaction mixture was stirred for 8 h at rt. Purification of the crude product by column chromatography ( $\text{SiO}_2$ , 30% EtOAc/hexanes) afforded 9-(naphthalen-2-yl)-8,9-dihydro-3'*H*,5'*H*-dispiro[benzo[4,5]isothiazolo[2,3-*a*]pyridine-7,2'-furan-4',1''-cyclopentane] 5,5-dioxide (**8ec**) (0.242 g, 78%) as a yellow solid. TLC:  $R_f$  = 0.60 ( $\text{SiO}_2$ , 15% EtOAc/hexanes);  $^1\text{H}$  NMR ( $\text{CDCl}_3$ , 400 MHz):  $\delta$  7.87-7.79 (m, 4H), 7.76 (s, 1H), 7.71 - 7.65 (m, 1H), 7.64-7.58 (m, 1H), 7.58-7.51 (m, 1H), 7.50-7.46 (m, 2H), 7.42 (dd,  $J$  = 8.50, 1.63 Hz, 1H), 5.87 (s, 1H), 4.29-4.18 (m, 2H), 3.80 (d,  $J$  = 8.13, Hz, 1H), 3.52 (d,  $J$  = 14.51 Hz, 1H), 2.46-2.37 (m, 1H), 2.31-2.21 (m, 1H), 2.13 (d,  $J$  = 14.51 Hz, 1H), 1.76-1.60 (m, 8H), 1.57-1.48 (m, 2H);  $^{13}\text{C}\{^1\text{H}\}$  NMR ( $\text{CDCl}_3$ , 101 MHz):  $\delta$  141.1, 133.7, 133.1, 132.7, 132.5, 131.7, 130.1, 129.4, 128.7, 127.8, 127.7, 126.4, 126.3, 126.2, 125.9, 121.1, 121, 105.2, 94.3, 79.1, 51, 46.3, 45.9, 39.7, 37.4, 35, 25, 24.4; IR (KBr,  $\text{cm}^{-1}$ ):  $\nu$  3066, 2942, 2867, 1697, 1665, 1599, 1464, 1305, 1243, 1172, 1005, 815, 746 ; HRMS (ESI)  $m/z$  calcd for  $\text{C}_{29}\text{H}_{29}\text{O}_3\text{NS}$   $[\text{M}+\text{H}]^+$  472.1941, found 472.1928.

*9-(p-Tolyl)-8,9-dihydro-3'H,5'H-dispiro[benzo[4,5]isothiazolo[2,3-a]pyridine-7,2'-furan-4',1''-cyclohexane] 5,5-dioxide (8ef)*: Following the *General Procedure*, to the mixture of (1-

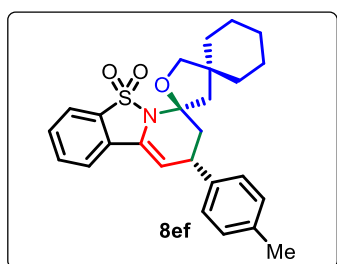

(prop-2-yn-1-yl)cyclohexyl)methanol (**2e**) (0.1 g, 0.657 mmol) and (*E*)-3-(4-methylstyryl)benzo[*d*]isothiazole 1,1-dioxide (**5f**) (0.186 g, 0.657 mmol) in anhydrous  $\text{CH}_2\text{Cl}_2$  (2 mL),  $\text{Bi}(\text{OTf})_3$  (0.042 g, 0.065 mmol) was added under argon atmosphere at room temperature (35  $^\circ\text{C}$ ) and reaction mixture was stirred for 8



h at rt. Purification of the crude product by column chromatography (SiO<sub>2</sub>, 30% EtOAc/hexanes) afforded 9-(*p*-tolyl)-8,9-dihydro-3'*H*,5'*H*-dispiro[benzo[4,5]isothiazolo[2,3-*a*]pyridine-7,2'-furan-4',1''-cyclohexane] 5,5-dioxide (**8ef**) (0.220 g, 79%) as a yellow semi-solid. TLC: *R<sub>f</sub>* = 0.60 (SiO<sub>2</sub>, 15% EtOAc/hexanes); <sup>1</sup>H NMR (CDCl<sub>3</sub>, 400 MHz): δ 7.77 (d, *J* = 7.6 Hz, 1 H), 7.65-7.50 (m, 3 H), 7.22-7.14 (m, 4 H), 5.76 (s, 1 H), 4.16 (d, *J* = 8.5 Hz, 1 H), 4.00 (ddd, *J* = 2.1, 5.6, 12.3 Hz, 1 H), 3.87 (d, *J* = 8.4 Hz, 1 H), 3.21 (d, *J* = 14.8 Hz, 1 H), 2.35 (s, 3 H), 2.32-2.24 (m, 1 H), 1.79-1.59 (m, 3 H), 1.55-1.40 (m, 7 H); <sup>13</sup>C{<sup>1</sup>H} NMR (CDCl<sub>3</sub>, 126 MHz): δ 140.7, 136.9, 133.0, 132.5, 131.4, 130.0, 129.7, 129.4, 127.8, 121.0, 121.0, 105.5, 94.3, 77.5, 76.9, 46.9, 44.2, 37.0, 36.9, 35.1, 26.1, 24.5, 23.3, 21.2; HRMS (ESI) *m/z* calcd for C<sub>26</sub>H<sub>29</sub>NO<sub>3</sub>S [M+H]<sup>+</sup> 436.1941, found 436.1934.

9-(2-Methoxyphenyl)-8,9-dihydro-3'*H*,5'*H*-dispiro[benzo[4,5]isothiazolo[2,3-*a*]pyridine-7,2'-furan-4',1''-cyclohexane] 5,5-dioxide (**8ei**): Following the *General Procedure*, to the mixture

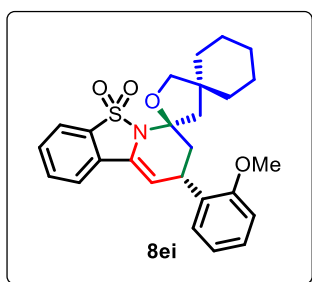

of (1-(prop-2-yn-1-yl)cyclohexyl)methanol (**2e**) (0.1 g, 0.657 mmol) and (*E*)-3-(2-methoxystyryl)benzo[*d*]isothiazole 1,1-dioxide (**5i**) (0.194 g, 0.657 mmol) in anhydrous CH<sub>2</sub>Cl<sub>2</sub> (2 mL), Bi(OTf)<sub>3</sub> (0.042 g, 0.065 mmol) was added under argon atmosphere at room temperature (35 °C) and reaction mixture was stirred for 8 h at rt. Purification of the crude product by column

chromatography (SiO<sub>2</sub>, 30% EtOAc/hexanes) afforded 9-(2-methoxyphenyl)-8,9-dihydro-3'*H*,5'*H*-dispiro[benzo[4,5]isothiazolo[2,3-*a*]pyridine-7,2'-furan-4',1''-cyclohexane] 5,5-dioxide (**8ei**) (0.220 g, 75%) as a yellow solid. TLC: *R<sub>f</sub>* = 0.60 (SiO<sub>2</sub>, 15% EtOAc/hexanes; <sup>1</sup>H NMR (CDCl<sub>3</sub>, 400 MHz): δ 7.78 (d, *J* = 7.75 Hz, 1H), 7.62-7.57 (m, 1H), 7.57-7.50 (m, 1H), 7.44 (d, *J* = 7.75 Hz, 1H), 7.22-7.16 (m, 1H), 7.11 (dd, *J* = 1.38, 7.63 Hz, 1H), 6.92-6.83 (m, 2H), 4.71 (s, 1H), 4.33 (d, *J* = 8.63 Hz, 1H), 4.03 (d, *J* = 9.01 Hz, 1H), 3.85 (s, 3H), 3.73 (s, 1H), 3.65-3.54 (m, 1H), 2.53 (dd, *J* = 4.75, 17.13 Hz, 1H), 2.39 (dd, *J* = 11.76, 16.88 Hz, 1H), 2.23-2.13 (m, 2H), 1.71 (dd, *J* = 3.75, 12.88 Hz, 1H), 1.61 (d, *J* = 11.01 Hz, 2H), 1.46 (d, *J* = 12.13 Hz, 1H), 1.36 (d, *J* = 13.01 Hz, 1H), 1.19 (d, *J* = 12.63 Hz, 1H), 1.01-0.82 (m, 3H), 0.73-0.59 (m, 1H); <sup>13</sup>C{<sup>1</sup>H} NMR (CDCl<sub>3</sub>, 101 MHz): δ 159.7, 157.2, 143.6, 135.8, 132.6, 131.3, 129.6, 127.9, 126.4, 125.8, 121.5, 120.7, 112.6, 110.7, 79.3, 65.3, 55.5, 49.1, 47.4, 36.8, 35.6, 31.9, 29.8, 24.9, 23.7, 23.2; IR (KBr, cm<sup>-1</sup>): ν 3011, 2944, 2355, 1673, 1600, 1454, 1345, 1289, 1241, 1163, 1036, 938, 750; HRMS (ESI) *m/z* calcd for C<sub>26</sub>H<sub>29</sub>O<sub>4</sub>NS [M+H]<sup>+</sup> 452.1890, found 452.1874.

9-(4-Methoxyphenyl)-8,9-dihydro-3'H,5'H-dispiro[benzo[4,5]isothiazolo[2,3-a]pyridine-7,2'-furan-4',1''-cyclohexane] 5,5-dioxide (**8ej**): Following the *General Procedure*, to the mixture

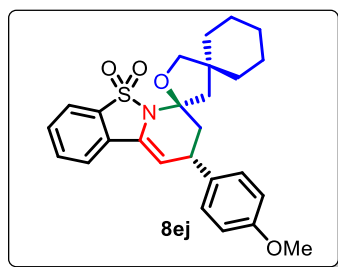

of (1-(prop-2-yn-1-yl)cyclohexyl)methanol (**2e**) (0.1 g, 0.657 mmol) and (*E*)-3-(4-methoxystyryl)benzo[*d*]isothiazole 1,1-dioxide (**5j**) (0.194 g, 0.657 mmol) in anhydrous CH<sub>2</sub>Cl<sub>2</sub> (2 mL), Bi(OTf)<sub>3</sub> (0.042 g, 0.065 mmol) was added under argon atmosphere at room temperature (35 °C) and reaction mixture was stirred for 8 h at rt. Purification of the crude product by

column chromatography (SiO<sub>2</sub>, 30% EtOAc/hexanes) afforded 9-(4-methoxyphenyl)-8,9-dihydro-3'H,5'H-dispiro[benzo[4,5]isothiazolo[2,3-a]pyridine-7,2'-furan-4',1''-cyclohexane] 5,5-dioxide (**8ej**) (0.246 g, 82%) with dr 1:3 as an yellow solid. TLC: *R<sub>f</sub>* = 0.60 (SiO<sub>2</sub>, 15% EtOAc/hexanes); <sup>1</sup>H NMR (CDCl<sub>3</sub>, 400 MHz): δ 7.77 (d, *J* = 7.5 Hz, 2 H), 7.67 - 7.48 (m, 5 H), 7.24 - 7.14 (m, 4 H), 6.93 - 6.86 (m, 3 H), 5.75 (br. s., 1.5 H), 4.22 (d, *J* = 8.1 Hz, 1 H), 4.16 (d, *J* = 8.4 Hz, 1 H), 4.03-3.94 (m, 2 H), 3.87 (d, *J* = 8.5 Hz, 1 H), 3.81 (s, 5 H), 3.79 - 3.74 (m, 1 H), 3.52 - 3.42 (m, 1 H), 3.21 (d, *J* = 14.9 Hz, 1 H), 2.35 - 2.23 (m, 2 H), 2.20 - 2.07 (m, 4 H), 1.87 - 1.57 (m, 9 H), 1.57 - 1.42 (m, 10 H); <sup>13</sup>C{<sup>1</sup>H} NMR (CDCl<sub>3</sub>, 101 MHz): δ 158.6, 135.5, 135.5, 132.8, 132.8, 132.3, 131.2, 131.2, 129.9, 129.2, 129.2, 128.6, 120.8, 120.8, 120.8, 114.2, 105.5, 105.4, 94.2, 94.1, 78.9, 68.8, 55.3, 50.8, 46.8, 46.1, 45.9, 44.0, 40.5, 39.5, 36.7, 36.4, 36.2, 34.9, 34.8, 26.6, 25.9, 25.8, 24.8, 24.3, 24.2, 23.1; IR (KBr, cm<sup>-1</sup>): ν 3019, 2938, 1706, 1664, 1607, 1514, 1449, 1305, 1242, 1172, 1023, 833, 743; HRMS (ESI) *m/z* calcd for C<sub>26</sub>H<sub>29</sub>O<sub>4</sub>NS [M+H]<sup>+</sup> 452.1890, found 452.1876.

9-(4-(Benzyloxy)phenyl)-8,9-dihydro-3'H,5'H-dispiro[benzo[4,5]isothiazolo[2,3-a]pyridine-7,2'-furan-4',1''-cyclohexane] 5,5-dioxide (**8ek**): Following the *General Procedure*, to the

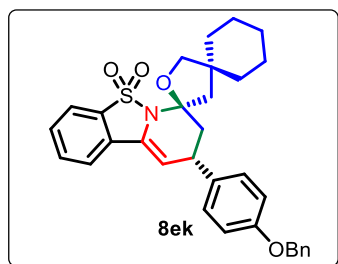

mixture of (1-(prop-2-yn-1-yl)cyclohexyl)methanol (**2e**) (0.1 g, 0.657 mmol) and (*E*)-3-(4-(benzyloxy)styryl)benzo[*d*]isothiazole 1,1-dioxide (**5k**) (0.244 g, 0.657 mmol) in anhydrous CH<sub>2</sub>Cl<sub>2</sub> (2 mL), Bi(OTf)<sub>3</sub> (0.042 g, 0.065 mmol) was added under argon atmosphere at room temperature (35 °C) and reaction mixture was stirred for 8 h at rt. Purification of the crude product by

column chromatography (SiO<sub>2</sub>, 30% EtOAc/hexanes) afforded 9-(4-(benzyloxy)phenyl)-8,9-dihydro-3'H,5'H-dispiro[benzo[4,5]isothiazolo[2,3-a]pyridine-7,2'-furan-4',1''-cyclohexane] 5,5-dioxide (**8ek**) (0.208 g, 60%) as an off-white solid. TLC: *R<sub>f</sub>* = 0.60 (SiO<sub>2</sub>, 15% EtOAc/hexanes); <sup>1</sup>H NMR (CDCl<sub>3</sub>, 400 MHz): δ 7.78 (d, *J* = 7.75, Hz, 1H), 7.65-7.50 (m,



3H), 7.46-7.33 (m, 5H), 7.21(d,  $J = 8.50$ , Hz, 2H), 6.96 (d,  $J = 8.63$ , Hz, 2H), 5.76 (s, 2H), 4.21 (d,  $J = 8.38$ , Hz, 1H), 3.99 (d,  $J = 12.88$ , Hz, 1H), 3.76 (d,  $J = 8.25$ , Hz, 1H), 3.48 (d,  $J = 14.38$ , Hz, 1H), 2.37-2.31 (m, 1H), 2.16-2.08 (m, 2H), 1.70-1.64 (m, 4H), 1.49 (d,  $J = 6.38$ , Hz, 2H);  $^{13}\text{C}\{^1\text{H}\}$  NMR ( $\text{CDCl}_3$ , 101 MHz):  $\delta$  158, 136.0, 133.0, 130.1, 128.9, 128.8, 128.1, 127.6, 121.1, 120.9, 115.3, 105.7, 94.4, 79.1, 70.3, 51.0, 46.1, 39.7, 36.4, 35, 25, 24.4.

*4',4'*-Dimethyl-9-(naphthalen-1-yl)-4',5',8,9-tetrahydro-3'H-spiro[benzo[4,5]isothiazolo[2,3-a]pyridine-7,2'-furan] 5,5-dioxidedioxide (**8fb**): Following the *General Procedure*, to the

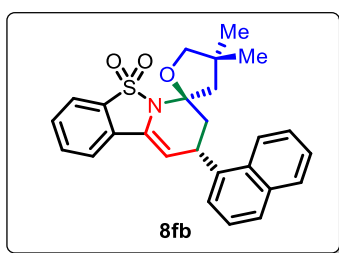

mixture of 2,2-dimethylpent-4-yn-1-ol (**2f**) (0.1 g, 0.891 mmol) and (*E*)-3-(2-(naphthalen-1-yl)vinyl)benzo[*d*]isothiazole 1,1-dioxide (**5b**) (0.284 g, 0.891 mmol) in anhydrous  $\text{CH}_2\text{Cl}_2$  (2 mL),  $\text{Bi}(\text{OTf})_3$  (0.038 g, 0.89 mmol) was added under argon atmosphere at (35 °C) and the reaction mixture was stirred for 8

h at rt. Purification of the crude product by column chromatography ( $\text{SiO}_2$ , 30% EtOAc/hexanes) afforded *4',4'*-dimethyl-9-(naphthalen-1-yl)-4',5',8,9-tetrahydro-3'H-spiro[benzo[4,5]isothiazolo[2,3-a]pyridine-7,2'-furan] 5,5-dioxidedioxide (**8fb**) (0.284 g, 74%) as a yellow semi-solid. TLC:  $R_f = 0.60$  ( $\text{SiO}_2$ , 15% EtOAc/hexanes) **8fb** was confirmed by  $^1\text{H}$  NMR,  $^{13}\text{C}$  NMR, DEPT, HRMS and 2D NMR analysis; $^{20}$   $^1\text{H}$  NMR ( $\text{CDCl}_3$ , 400 MHz):  $\delta$  8.22 (d,  $J = 8.38$  Hz, 1 H), 7.95-7.89 (m, 1 H), 7.83 - 7.76 (m, 2 H), 7.70-7.63 (m, 1 H), 7.62-7.50 (m, 4 H), 7.48-7.43 (m, 2 H), 5.96 (s, 1 H), 4.94 (s, 1 H), 4.31 (d,  $J = 8.25$ , Hz, 1 H), 3.77 (d,  $J = 8.13$ , Hz, 1 H), 3.37 (d,  $J = 14.76$  Hz, 1 H), 2.57 (dd,  $J = 12.69, 4.57$  Hz, 1 H), 2.36-2.20 (m, 1 H), 2.01 (d,  $J = 14.63$  Hz, 1 H), 1.31 (s, 3 H), 1.24 (s, 3 H);  $^{13}\text{C}\{^1\text{H}\}$  NMR ( $\text{CDCl}_3$ , 126 MHz):  $\delta$  139.4, 134.2, 133.1, 132.5, 131.5, 131.1, 130.1, 129.4, 129.3, 129, 127.7, 126.6, 125.9, 125.9, 123, 121.1, 121, 105.5, 95, 80.4, 61.8, 47.8, 45.3, 40.1, 28.9, 25; HRMS (ESI)  $m/z$  calcd for  $\text{C}_{26}\text{H}_{25}\text{NO}_3\text{S}$  [ $\text{M}+\text{H}$ ] $^+$  432.1628, found 432.1628.

*4',4'*-Dimethyl-9-(*p*-tolyl)-4',5',8,9-tetrahydro-3'H-spiro[benzo[4,5]isothiazolo[2,3-a]pyridine-7,2'-furan] 5,5-dioxide (**8ff**): Following the *General Procedure*, to the mixture of

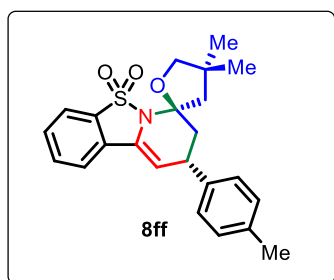

2,2-dimethylpent-4-yn-1-ol (**2f**) (0.1 g, 0.891 mmol) and (*E*)-3-(4-methylstyryl)benzo[*d*]isothiazole 1,1-dioxide (**5f**) (0.252 g, 0.891 mmol) in anhydrous  $\text{CH}_2\text{Cl}_2$  (2 mL),  $\text{Bi}(\text{OTf})_3$  (0.058 g, 0.089 mmol) was added under argon atmosphere at room temperature (35 °C) and the reaction mixture was stirred for 8 h

at rt. Purification of the crude product by column chromatography (SiO<sub>2</sub>, 30% EtOAc/hexanes) afforded 4',4'-dimethyl-9-(*p*-tolyl)-4',5',8,9-tetrahydro-3'*H*-spiro[benzo[4,5]isothiazolo[2,3-*a*]pyridine-7,2'-furan] 5,5-dioxide (**8ff**) (0.234 g, 66%) as an off-white solid. TLC: *R<sub>f</sub>* = 0.60 (SiO<sub>2</sub>, 15% EtOAc/hexanes); <sup>1</sup>H NMR (CDCl<sub>3</sub>, 400 MHz): δ 7.80-7.76 (m, 1H), 7.65-7.56 (m, 2H), 7.55-7.50 (m, 1H), 7.22-7.14 (m, 4H), 5.80-5.74 (m, 1H), 4.22 (d, *J* = 8.25 Hz, 1H), 4.02 (ddd, *J* = 12.48, 5.72, 2.44 Hz, 1H), 3.67 (d, *J* = 8.25 Hz, 1H), 3.32 (d, *J* = 14.76 Hz, 1H), 2.40-2.29 (m, 4H), 2.22-2.12 (m, 1H), 2.07-1.95 (m, 1H), 1.28 (s, 3H), 1.22 (s, 3H); <sup>13</sup>C{<sup>1</sup>H} NMR (CDCl<sub>3</sub>, 101 MHz): δ 140.6, 136.9, 133, 132.5, 131.4, 130, 129.6, 127.7, 121, 120.9, 105.5, 94.9, 80.4, 47.8, 46.6, 40.1, 37, 29, 25, 21.2; HRMS (ESI) *m/z* calcd for C<sub>23</sub>H<sub>25</sub>NO<sub>3</sub>S [M+H]<sup>+</sup> 398.1628, found 398.1619.

9-(2-Bromophenyl)-4',4'-dimethyl-4',5',8,9-tetrahydro-3'*H*-spiro[benzo[4,5]isothiazolo[2,3-*a*]pyridine-7,2'-furan] 5,5-dioxide (**8fg**): Following the *General Procedure*, to the mixture of

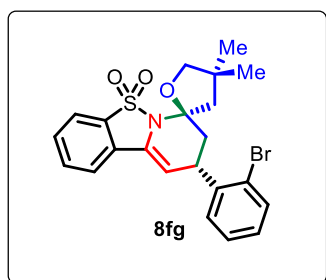

2,2-dimethylpent-4-yn-1-ol (**2f**) (0.1 g, 0.891 mmol) and (*E*)-3-(2-bromostyryl)benzo[*d*]isothiazole 1,1-dioxide (**5g**) (0.310 g, 0.891 mmol) in anhydrous CH<sub>2</sub>Cl<sub>2</sub> (2 mL), Bi(OTf)<sub>3</sub> (0.058 g, 0.089 mmol) was added under argon atmosphere at room temperature (35 °C) and reaction mixture was stirred for 8 h at rt.

Purification of the crude product by column chromatography (SiO<sub>2</sub>, 30% EtOAc/hexanes) afforded 9-(2-bromophenyl)-4',4'-dimethyl-4',5',8,9-tetrahydro-3'*H*-spiro[benzo[4,5]isothiazolo[2,3-*a*]pyridine-7,2'-furan] 5,5-dioxide (**8fg**) (0.340 g, 83%) as an off-white solid. TLC: *R<sub>f</sub>* = 0.60 (SiO<sub>2</sub>, 15% EtOAc/hexanes, **8fg** was confirmed by <sup>1</sup>H NMR, <sup>13</sup>C NMR, DEPT, and 2D NMR analysis;<sup>20</sup> <sup>1</sup>H NMR (CDCl<sub>3</sub>, 400 MHz): δ 7.79 (d, *J* = 7.75 Hz, 1H), 7.71-7.66 (m, 1H), 7.64-7.51 (m, 3H), 7.31 (d, *J* = 7.75 Hz, 2H), 7.17-7.10 (m, 1H), 5.78 (s, 1H), 4.58 (ddd, *J* = 12.29, 5.41, 2.31 Hz, 1H), 4.20 (d, *J* = 8.25 Hz, 1H), 3.70 (d, *J* = 8.13 Hz, 1H), 3.30 (d, *J* = 14.63 Hz, 1H), 2.54 (dd, *J* = 12.95, 4.57 Hz, 1H), 2.04-1.94 (m, 2H), 1.25 (s, 3H), 1.28 (s, 3H); <sup>13</sup>C{<sup>1</sup>H} NMR (CDCl<sub>3</sub>, 126 MHz): δ 142.6, 133.2, 133.1, 132.5, 132.3, 130.2, 129.3, 128.9, 128.6, 128.2, 124.5, 121.1, 120.9, 104.1, 94.7, 80.4, 47.8, 44.2, 40.1, 36.8, 28.8, 25.1; HRMS (ESI) *m/z* calcd for C<sub>22</sub>H<sub>22</sub>BrNO<sub>3</sub>S [M+H]<sup>+</sup> 460.0577, found 460.0571.

9-(Naphthalen-1-yl)-4',4'-diphenyl-4',5',8,9-tetrahydro-3'*H*-spiro[benzo[4,5]isothiazolo[2,3-*a*]pyridine-7,2'-furan] 5,5-dioxide (**8gb**): Following the *General Procedure*, to the mixture of 2,2-diphenylpent-4-yn-1-ol (**2g**) (0.1 g, 0.423 mmol) and (*E*)-3-(2-(naphthalen-1-

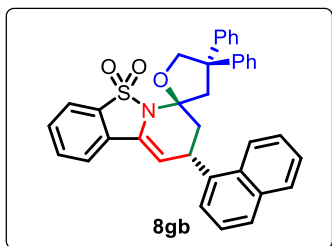

yl)vinyl)benzo[*d*]isothiazole 1,1-dioxide (**5b**) (0.135 g, 0.423 mmol) in anhydrous CH<sub>2</sub>Cl<sub>2</sub> (2 mL), Bi(OTf)<sub>3</sub> (0.027 g, 0.042 mmol) was added under argon atmosphere at room temperature (35 °C) and reaction mixture was stirred for 8 h at rt. Purification of the crude product by column chromatography (SiO<sub>2</sub>, 30% EtOAc/hexanes) afforded 9-(naphthalen-1-yl)-4',4'-diphenyl-4',5',8,9-tetrahydro-3'*H*-spiro[benzo[4,5]isothiazolo[2,3-*a*]pyridine-7,2'-furan] 5,5-dioxide (**8gb**) (0.203 g, 86%) as an off-white crystal, **8gb** was confirmed by <sup>1</sup>H NMR, <sup>13</sup>C NMR, DEPT, and XRD analysis;<sup>20</sup> TLC: *R<sub>f</sub>* = 0.60 (SiO<sub>2</sub>, 15% EtOAc/hexanes); <sup>1</sup>H NMR (CDCl<sub>3</sub>, 400 MHz): δ 7.91-7.80 (m, 3H), 7.73 (t, *J* = 7.00 Hz, 2H), 7.64 (td, *J* = 7.60, 1.19 Hz, 1H), 7.59-7.43 (m, 5H), 7.42-7.28 (m 8H), 7.24-7.20 (m 1H), 7.11-7.06 (m, 1H), 6.01-5.94 (m, 1H), 5.11-5.03 (m, 1H), 4.83-4.71(m, 2H), 4.44 (d, *J* = 14.13 Hz, 1H), 2.86 (dd, *J* = 14.20, 1.31 Hz, 1H), 2.09-1.96 (m, 1H), 1.88(d, *J* = 12.26 Hz, 1H): <sup>13</sup>C{<sup>1</sup>H} NMR (CDCl<sub>3</sub>, 101 MHz): δ 145.9, 143.9, 139.5, 133.9, 133.2, 132.3, 131.3, 130.2, 129.4, 129, 128.8, 128.7, 127.6, 128.5, 127.6, 127.4, 127.3, 126.8, 126.7, 126.4, 125.9, 123.1, 121.1, 121.1, 105.6, 94.9, 76.2, 56.1, 46.1, 43.8; IR (KBr, cm<sup>-1</sup>): ν 3067, 3031, 2926, 1595, 1539, 1492, 1451, 1306, 1249, 1174, 1039, 813, 751, 696; HRMS (ESI) *m/z* calcd for C<sub>36</sub>H<sub>29</sub>O<sub>3</sub>NS [M+H]<sup>+</sup> 556.1941, found 556.1931.

4',4'-Diphenyl-9-(*p*-tolyl)-4',5',8,9-tetrahydro-3'*H*-spiro[benzo[4,5]isothiazolo[2,3-*a*]pyridine-7,2'-furan] 5,5-dioxide (**8gf**):

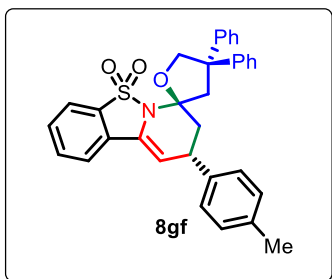

Following the *General Procedure*, to the mixture of 2,2-diphenylpent-4-yn-1-ol (**2g**) (0.1 g, 0.423 mmol) and (*E*)-3-(4-methylstyryl)benzo[*d*]isothiazole 1,1-dioxide (**5f**) (0.119 g, 0.423 mmol) in anhydrous CH<sub>2</sub>Cl<sub>2</sub> (2 mL), Bi(OTf)<sub>3</sub> (0.027 g, 0.042 mmol) was added under argon atmosphere at room temperature (35 °C) and the reaction mixture was stirred for 8 h at rt. Purification of the crude product by column chromatography (SiO<sub>2</sub>, 30% EtOAc/hexanes) afforded 4',4'-diphenyl-9-(*p*-tolyl)-4',5',8,9-tetrahydro-3'*H*-spiro[benzo[4,5]isothiazolo[2,3-*a*]pyridine-7,2'-furan] 5,5-dioxide (**8gf**) (0.152 g, 69%) as an off-white solid. TLC: *R<sub>f</sub>* = 0.60 (SiO<sub>2</sub>, 15% EtOAc/hexanes); <sup>1</sup>H NMR (CDCl<sub>3</sub>, 400 MHz): δ 7.78 (d, *J* = 7.88 Hz, 1H), 7.67-7.58 (m, 2H), 7.56-7.51 (m, 1H), 7.42 (d, *J* = 7.75 Hz, 2H), 7.33-7.29 (m, 5H), 7.25-7.16 (m, 3H), 7.10 (d, *J* = 8.00 Hz, 2H), 7.03 (m, *J* = 7.88 Hz, 2H) 5.79 (s, 1H), 4.97 (d, *J* = 9.38 Hz, 1H), 4.67 (d, *J* = 9.26 Hz, 1H), 4.42 (d, *J* = 14.01 Hz, 1H), 3.95-3.83 (m, 1H), 2.85 (d, *J* = 14.13 Hz, 1H), 2.31 (s, 3H), 1.87-1.76 (m, 1H), 1.74-1.65 (m, 1H): <sup>13</sup>C{<sup>1</sup>H} NMR (CDCl<sub>3</sub>, 101 MHz): δ 146.1, 144.1, 140.5, 136.6,

133.1, 130.1, 129.5, 129.4, 128.7, 128.6, 127.5, 127.5, 127.3, 126.8, 126.7, 121.1, 120.9, 105.7, 94.8, 76.3, 56, 46.1, 44.9, 36.2, 21.1; IR (KBr,  $\text{cm}^{-1}$ ):  $\nu$  3062, 3014, 2927, 1659, 1596, 1491, 1449, 1304, 1174, 1037, 751, 695; HRMS (ESI)  $m/z$  calcd for  $\text{C}_{33}\text{H}_{29}\text{O}_3\text{NS}$   $[\text{M}+\text{H}]^+$  520.1941, found 520.1927.

9-(2-Bromophenyl)-4',4'-diphenyl-4',5',8,9-tetrahydro-3'H-spiro[benzo[4,5]isothiazolo[2,3-a]pyridine-7,2'-furan] 5,5-dioxide (**8gg**): Following the *General Procedure*, to the mixture of

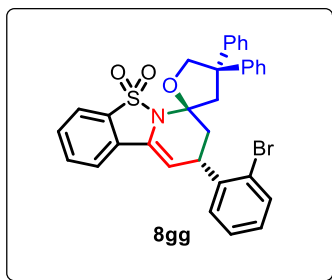

2,2-diphenylpent-4-yn-1-ol (**2g**) (0.1 g, 0.423 mmol) and (*E*)-3-(2-bromostyryl)benzo[*d*]isothiazole 1,1-dioxide (**5g**) (0.147 g, 0.423 mmol) in anhydrous  $\text{CH}_2\text{Cl}_2$  (2 mL),  $\text{Bi}(\text{OTf})_3$  (0.027 g, 0.042 mmol) was added under argon atmosphere at room temperature ( $35\text{ }^\circ\text{C}$ ) and reaction mixture was stirred for 8 h at rt. Purification of the crude product by column chromatography

( $\text{SiO}_2$ , 30% EtOAc/hexanes) afforded 9-(2-bromophenyl)-4',4'-diphenyl-4',5',8,9-tetrahydro-3'H-spiro[benzo[4,5]isothiazolo[2,3-a]pyridine-7,2'-furan] 5,5-dioxide (**8gg**) (0.205 g, 83%) as an off-white solid. TLC:  $R_f$  = 0. ( $\text{SiO}_2$ , 15% EtOAc/hexanes);  $^1\text{H}$  NMR ( $\text{CDCl}_3$ , 400 MHz):  $\delta$  7.79 (d,  $J$  = 7.63 Hz, 1H), 7.71-7.67 (m, 1H), 7.66-7.60 (m, 1H), 7.56 (d,  $J$  = 7.75 Hz, 1H), 7.49 (d,  $J$  = 7.75 Hz, 1H), 7.42 (d,  $J$  = 7.38 Hz, 2H), 7.35-7.29 (m, 6H), 7.25-7.20 (m, 4H), 7.09-7.04 (m, 1H), 5.77 (s, 1H), 4.99 (d,  $J$  = 9.51 Hz, 1H), 4.67 (d,  $J$  = 9.26 Hz, 1H), 4.52-4.40 (m, 2H), 2.82 (d,  $J$  = 14.01 Hz, 1H), 2.00-1.90 (m, 1H), 1.65 (t,  $J$  = 12.44 Hz, 1H);  $^{13}\text{C}\{^1\text{H}\}$  NMR ( $\text{CDCl}_3$ , 101 MHz):  $\delta$  146.2, 144.2, 142.6, 133.2, 133.1, 132.4, 130.3, 129.2, 129, 128.9, 128.7, 128.5, 128.5, 128.1, 128, 127.6, 127.4, 126.8, 126.6, 124.5, 121.2, 121, 104.5, 94.9, 76.5, 56.1, 46.1, 43, 36.4; IR (KBr,  $\text{cm}^{-1}$ ):  $\nu$  3745, 3073, 3040, 2997, 2924, 2336, 1699, 1656, 1590, 1468, 1306, 1245, 1174, 1024, 868, 755, 697; HRMS (ESI)  $m/z$  calcd for  $\text{C}_{32}\text{H}_{26}\text{BrNO}_3\text{S}$   $[\text{M}+\text{H}]^+$  584.0890 found, 584.0884.

9-(2-Methoxyphenyl)-4',4'-diphenyl-4',5',8,9-tetrahydro-3'H-spiro[benzo[4,5]isothiazolo[2,3-a]pyridine-7,2'-furan] 5,5-dioxide (**8gi**): Following the *General Procedure*, to the mixture of

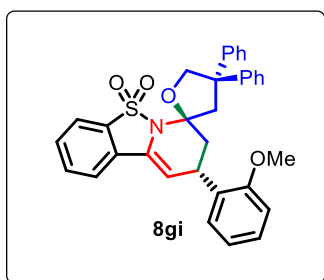

2,2-diphenylpent-4-yn-1-ol (**2g**) (0.1 g, 0.423 mmol) and (*E*)-3-(2-methoxystyryl)benzo[*d*]isothiazole 1,1-dioxide (**5i**) (0.126 g, 0.423 mmol) in anhydrous  $\text{CH}_2\text{Cl}_2$  (2 mL),  $\text{Bi}(\text{OTf})_3$  (0.027 g, 0.042 mmol) was added under argon atmosphere at room temperature ( $35\text{ }^\circ\text{C}$ ) and reaction mixture was stirred for 8 h at rt.

Purification of the crude product by column chromatography (SiO<sub>2</sub>, 30% EtOAc/hexanes) afforded 9-(2-methoxyphenyl)-4',4'-diphenyl-4',5',8,9-tetrahydro-3'H-spiro[benzo[4,5]isothiazolo[2,3-a]pyridine-7,2'-furan] 5,5-dioxide (**8gi**) (0.181 g, 80%) as an off-white solid. TLC: *R<sub>f</sub>* = 0.60 (SiO<sub>2</sub>, 15% EtOAc/hexanes); <sup>1</sup>H NMR (CDCl<sub>3</sub>, 400 MHz): δ 7.78 (d, *J* = 7.50 Hz, 1H), 7.71-7.66 (m, 1H), 7.60 (td, *J* = 7.25, 1.13 Hz, 1H), 7.56-7.5 (m, 1H), 7.44-7.37 (m, 2H), 7.31-7.27 (m, 5H), 7.23-7.16 (m, 4H), 7.12 (dd, *J* = 7.63, 1.75 Hz, 1H), 6.88 (td, *J* = 7.50, 1.13 Hz, 1H), 6.81 (dd, *J* = 8.25, 0.88 Hz, 1H), 5.80 (dd, *J* = 2.25, 1.25 Hz, 1H), 4.97 (dd, *J* = 8.00, 1.25 Hz, 1H), 4.68 (d, *J* = 9.26 Hz, 1H), 4.43-4.32 (m, 2H), 3.76 (s, 3H), 2.84 (dd, *J* = 14.13, 1.38 Hz, 1H), 1.86 (qd, *J* = 12.88, 5.75, 1.38 Hz, 1H), 1.72 (t, *J* = 11.66 Hz, 1H); <sup>13</sup>C{<sup>1</sup>H} NMR (CDCl<sub>3</sub>, 101 MHz): δ 157.1, 146.3, 133.1, 132.3, 131.9, 131.6, 129.9, 129.6, 128.7, 128.5, 128, 127.9, 127.6, 127.4, 126.8, 126.4, 121.1, 120.9, 120.8, 110.5, 105.7, 95.1, 76.4, 56.1, 55.4, 46.2, 42.6, 30.1; IR (KBr, cm<sup>-1</sup>): ν 3062, 3008, 2886, 1702, 1665, 1598, 1491, 1443, 1378, 1292, 1221, 1044, 747, 696.

9-(4-Methoxyphenyl)-4',4'-diphenyl-4',5',8,9-tetrahydro-3'H-spiro[benzo[4,5]isothiazolo[2,3-a]pyridine-7,2'-furan] 5,5-dioxide (**8gj**): Following the *General Procedure*, to the mixture of

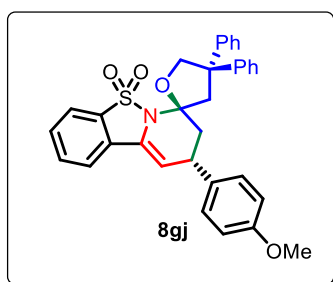

2,2-diphenylpent-4-yn-1-ol (**2g**) (0.1 g, 0.423 mmol) and (*E*)-3-(4-methoxystyryl)benzo[*d*]isothiazole 1,1-dioxide (**5j**) (0.126 g, 0.423 mmol) in anhydrous CH<sub>2</sub>Cl<sub>2</sub> (2 mL), Bi(OTf)<sub>3</sub> (0.027 g, 0.042 mmol) was added under argon atmosphere at room temperature (35 °C) and reaction mixture was stirred for 8 h at rt. Purification of the crude product by column chromatography

(SiO<sub>2</sub>, 30% EtOAc/hexanes) afforded 9-(4-methoxyphenyl)-4',4'-diphenyl-4',5',8,9-tetrahydro-3'H-spiro[benzo[4,5]isothiazolo[2,3-a]pyridine-7,2'-furan] 5,5-dioxide (**8gj**) (0.189 g, 83%) as an off-white solid. TLC: *R<sub>f</sub>* = 0.60 (SiO<sub>2</sub>, 15% EtOAc/hexanes); <sup>1</sup>H NMR (CDCl<sub>3</sub>, 400 MHz): δ 7.83-7.76 (m, 1H), 7.69-7.49 (m, 3H), 7.47-7.38 (m, 2H), 7.34-7.27 (m, 6H), 7.25-7.15 (m, 2H), 7.08-7.01 (m, 2H), 6.85-6.80 (m, 2H), 5.78 (dd, *J* = 2.38, 1.50 Hz, 1H), 5.01-4.94 (m, 1H), 4.68 (d, *J* = 9.26 Hz, 1H), 4.42 (d, *J* = 14.13 Hz, 1H), 3.89 (ddd, *J* = 12.10, 5.63, 2.38 Hz, 1H), 3.81-3.73 (m, 3H), 2.85 (dd, *J* = 14.07, 1.3 Hz, 1H), 1.81 (t, *J* = 12.57 Hz, 1H), 1.64-1.72 (m, 1H); <sup>13</sup>C{<sup>1</sup>H} NMR (CDCl<sub>3</sub>, 101 MHz): δ 158.6, 146.1, 144.1, 135.5, 133.1, 132.3, 131.5, 130.1, 129.4, 128.7, 128.6, 128.6, 127.5, 127.3, 126.8, 126.7, 121.1, 120.9, 114.3, 105.8, 94.8, 76.3, 56, 55.4, 46.1, 45, 35.8; IR (KBr, cm<sup>-1</sup>): ν 3064, 3011, 2886, 1745, 1703, 1664, 1604, 1508, 1459, 1305, 1243, 1170, 1028, 831, 746; HRMS (ESI) *m/z* calcd for C<sub>33</sub>H<sub>29</sub>O<sub>4</sub>NS [M+H]<sup>+</sup> 536.1890, found 536.1882.

## 11. Synthetic utility:

8-(3-Hydroxypropyl)-7-methyl-9-phenyl-8,9,10,10a-tetrahydro-7H-

benzo[4,5]isothiazolo[2,3-a]pyridine 5,5-dioxide (**9aa**): To a solution of 12a-methyl-5-phenyl-3,4,4a,12a-tetrahydro-2H,5H-benzo [4,5]isothiazolo[2,3-a]pyrano[3,2-e] pyridine 11,11-dioxide (**6aa**) (0.1 g, 0.27 mmol), in anhydrous CH<sub>2</sub>Cl<sub>2</sub> (2 mL) was added Et<sub>3</sub>SiH (0.062 g, 0.54 mmol) and BF<sub>3</sub>·Et<sub>2</sub>O (0.042 g, 0.54 mmol) dropwise under argon atmosphere at room temperature (35 °C) and the reaction mixture was stirred for 2 h at rt. Purification of the crude product by

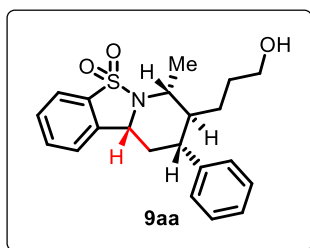

column chromatography (SiO<sub>2</sub>, 30% EtOAc/hexanes) afforded 8-(3-hydroxypropyl)-7-methyl-9-phenyl-8,9,10,10a-tetrahydro-7H-benzo[4,5]isothiazolo[2,3-a]pyridine 5,5-dioxide (**9aa**) (0.088 g, 88%) as an off-white solid. The **9aa** was confirmed by <sup>1</sup>H NMR, <sup>13</sup>C NMR, DEPT, and 2D NMR analysis;<sup>20</sup> TLC: *R*<sub>f</sub> = 0.80 (SiO<sub>2</sub>, 15% EtOAc/hexanes); <sup>1</sup>H NMR (CDCl<sub>3</sub>, 500 MHz): δ 7.79 (d, *J* = 7.6 Hz, 1H), 7.58-7.49 (m, 2H), 7.35-7.32 (m, 2H), 7.28 (d, *J* = 8.2 Hz, 1H), 7.24-7.21 (m, 2H), 4.30 (dd, *J* = 2.4, 11.9 Hz, 1H), 3.52-3.33 (m, 3H), 2.78 (dt, *J* = 3.5, 11.8 Hz, 1H), 2.44 (td, *J* = 3.2, 12.9 Hz, 1H), 1.93-1.86 (m, 1H), 1.80 (d, *J* = 6.4 Hz, 3H), 1.54-1.46 (m, 2H), 1.38-1.32 (m, 1H), 0.90-0.84 (m, 1H); <sup>13</sup>C{<sup>1</sup>H} NMR (CDCl<sub>3</sub>, 126 MHz): δ 143.5, 137.4, 136.2, 132.8, 129.3, 129.0, 127.7, 127.2, 122.6, 121.3, 63.0, 60.7, 56.5, 47.0, 46.3, 38.4, 28.2, 24.3, 16.3.

12a-Methyl-5-phenyl-3,4,4a,6,6a,12a-hexahydro-2H,5H-benzo[4,5]isothiazolo[2,3-

a]pyrano[3,2-e]pyridine 11,11-dioxide (**10aa**): Synthesis of **10**: The 10 mL round bottom

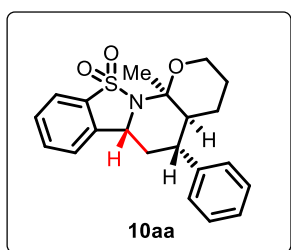

flask charged with 12a-methyl-5-phenyl-3,4,4a,12a-tetrahydro-2H,5H-benzo [4,5] isothiazolo [2,3-a]pyrano[3,2-e]pyridine 11,11-dioxide (**6aa**) (0.1 g, 0.27 mmol), in anhydrous MeOH (2 mL), then 10% Pd/C (5.7 mg, 0.054 mmol) was added under an argon atmosphere. The resulting suspension was hydrogenated for 12 h at room temperature (35 °C) under the H<sub>2</sub> balloon pressure (1 atm). Then the mixture was filtered through a celite pad, and the filtrate was concentrated to give the crude product, which was purified by silica-gel chromatography (SiO<sub>2</sub>, 20% EtOAc/hexanes) to afford 12a-methyl-5-phenyl-3,4,4a,6,6a,12a-hexahydro-2H,5H-benzo[4,5]isothiazolo[2,3-a]pyrano[3,2-e]pyridine 11,11-dioxide (**10aa**) as a white solid (0.067 g, 67%). TLC: *R*<sub>f</sub> = 0.40 (SiO<sub>2</sub>, 30% EtOAc/hexanes); <sup>1</sup>H NMR (CDCl<sub>3</sub>, 400 MHz): δ 7.79 (d, *J* = 7.5 Hz, 1H), 7.64-7.59 (m, 1H),



7.57-7.52 (m, 1H), 7.40 (d,  $J = 7.5$  Hz, 1H), 7.38-7.34 (m, 2H), 7.29 (s, 1H), 7.18 (d,  $J = 7.4$  Hz, 2H), 4.63 (dd,  $J = 2.6, 11.8$  Hz, 1H), 4.35-4.24 (m, 1H), 3.91-3.77 (m, 1H), 3.56-3.42 (m, 1H), 2.46-2.34 (m, 1H), 2.24-2.09 (m, 1H), 2.00 (s, 3H), 1.91-1.83 (m, 1H), 1.53 (br. s., 3H), 1.11-1.02 (m, 1H);  $^{13}\text{C}\{^1\text{H}\}$  NMR ( $\text{CDCl}_3$ , 101 MHz):  $\delta$  141.4, 137.2, 136.8, 132.6, 129.4, 128.7, 127.6, 126.9, 122.4, 121.0, 90.8, 63.9, 58.3, 48.1, 42.6, 28.0, 25.3, 23.9, 19.2.

## **12. Control experiment:**

5-(2-Methoxyphenyl)-3,4,4a,12a-tetrahydro-2H,5H-benzo[4,5]isothiazolo[2,3-a]pyrano[3,2-*e*]pyridine 11,11-dioxide (**6Ti**): Following the *General Procedure*, to the mixture of 3,4-

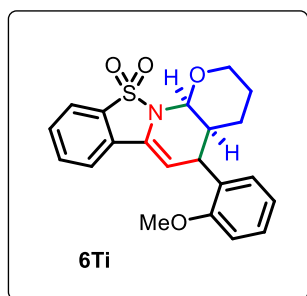

dihydro-2H-pyran (**T**) (0.1 g, 1.18 mmol) and (*E*)-3-(2-methoxystyryl)benzo[*d*]isothiazole 1,1-dioxide (**5i**) (0.355 g, 1.18 mmol) in anhydrous  $\text{CH}_2\text{Cl}_2$  (2 mL) was add  $\text{Bi}(\text{OTf})_3$  (0.077 g, 0.118 mmol) under argon atmosphere at room temperature ( $35^\circ\text{C}$ ) and reaction mixture was stirred for 8 h at rt. Purification of the crude product by column chromatography ( $\text{SiO}_2$ , 30% EtOAc/hexanes) afforded 5-(2-methoxyphenyl)-3,4,4a,12a-tetrahydro-2H,5H-benzo[4,5]isothiazolo[2,3-*a*]pyrano[3,2-*e*]pyridine 11,11-dioxide (**6Ti**) (0.310 g, 68%) as an off-white solid. TLC:  $R_f = 0.60$  ( $\text{SiO}_2$ , 15% EtOAc/hexanes);  $^1\text{H}$  NMR ( $\text{CDCl}_3$ , 400 MHz):  $\delta$  7.86 (d,  $J = 7.63$  Hz, 1H), 7.67-7.60 (m, 2H), 7.58-7.53 (m, 1H), 7.26-7.22 (m, 1H), 7.25-7.21 (m, 1H), 6.96-6.90 (m, 2H), 5.61(d,  $J = 3.50$  Hz, 1H), 5.40 (d,  $J = 3.00$  Hz, 1H), 4.33-4.17 (m, 2H), 3.87 (s, 3H), 3.84-3.76 (m, 1H), 2.16-2.09 (m, 1H), 2.0-1.90 (m, 1H), 1.78-1.68 (m, 2H), 0.93-0.82 (m, 1H);  $^{13}\text{C}\{^1\text{H}\}$  NMR ( $\text{CDCl}_3$ , 101 MHz):  $\delta$  157.2, 133.1, 132.8, 131.4, 130, 129.6, 129.1, 128.2, 121.4, 121.2, 120.9 110.7, 103.8, 79.3, 55.6, 39.6, 28.8, 25.5; IR (KBr,  $\text{cm}^{-1}$ ):  $\nu$  3200, 3144, 3065, 3030, 2929, 2853, 1737, 1661, 1594, 1527, 1457, 1311, 1244, 1166, 1094, 1025, 847, 753, 696; HRMS (ESI)  $m/z$  calcd for  $\text{C}_{21}\text{H}_{21}\text{O}_4\text{NS}$  [ $\text{M}+\text{H}$ ] $^+$  384.1264, found 384.1261.

### **13. Single crystal X-ray analyses:**

SC-XRD: The single crystal X-ray diffraction measurements were performed to determine the crystal structure of compounds **6ab**, **6dj**, **8gb** and **10aa** at 100 K using APEX3 (Bruker, 2016; Bruker D8 VENTURE Kappa Duo PHOTON II CPAD) diffractometer having graphite-monochromatized (**6ab**, **6dj** and **8gb** collected with  $\text{MoK}\alpha = 0.71073 \text{ \AA}$ , while **10aa** using with  $\text{CuK}\alpha$  source ( $1.5417 \text{ \AA}$ )). The X-ray generator was operated at 50 kV and 30 mA. A preliminary set of unit cell parameters and an orientation matrix were calculated from 36 frames, and the cell refinement was performed by SAINT-Plus (Bruker, 2016). An optimized strategy used for data collection consisted of different sets of  $\varphi$  and  $\omega$  scans with  $0.5\theta$  steps  $\varphi/\omega$ . The data were collected with a time frame of 10 sec for both the components by setting the sample to a detector distance fixed at 40 cm. All the data points were corrected for Lorentzian, polarization, and absorption effects using SAINT-Plus and SADABS programs (Bruker, 2016). The structure was refined by full-matrix least-squares refinement on  $F^2$  with anisotropic displacement parameters for non-H atoms using SHELXL-2013,<sup>1, 2</sup> constrained and fixed isotropic thermal parameters for aliphatic C–H hydrogen atoms following the riding model, localization of N–H hydrogen atoms from the difference Fourier map and free refinement of their positions with fixed isotropic thermal parameters.<sup>1, 2</sup> The molecular graphics of ORTEP diagrams were performed by Mercury software. The crystal symmetry of the components was cross-checked by running the cif files through PLATON (Spek, 2020) software and notified that no additional symmetry was observed. The Encifer software was used to correct the cif files. The compound **6ab** was crystallized by a slow evaporation method using a solvent system of 30% EtOAc/hexanes. The compound **6dj** was crystallized by a slow evaporation method using a solvent system of 30% EtOAc/hexanes. The compound **8gb** was crystallized by a slow evaporation method using a solvent system of 40% EtOAc/hexanes. The compound **10aa** was crystallized by a slow evaporation method using a solvent system of 50% EtOAc/hexanes.



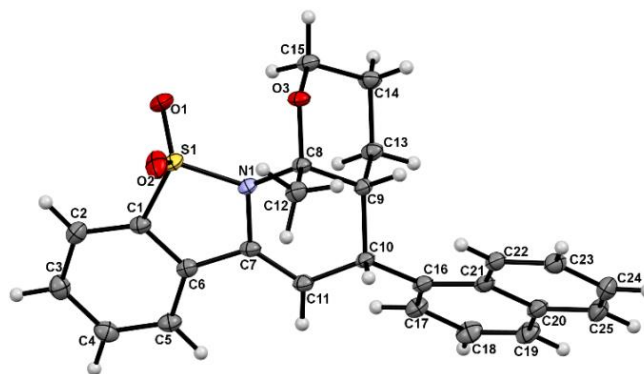

**Figure 1.** ORTEP diagram of compound **6ab**, the asymmetric unit contains a single molecule. Herein, the ellipsoids are drawn with a 50% probability.

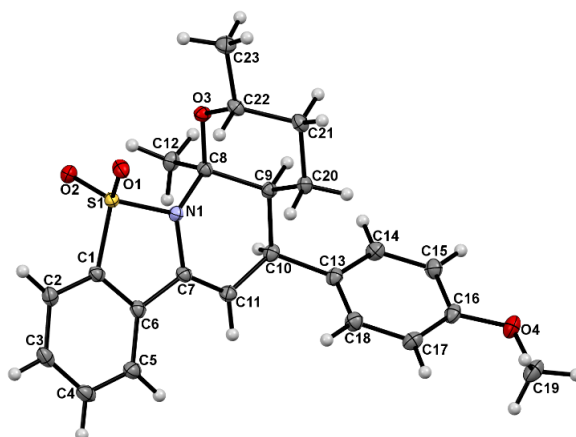

**Figure 2.** ORTEP diagram of compound **6dj**, the asymmetric unit contains a single molecule. Herein, the ellipsoids are drawn with a 50% probability.

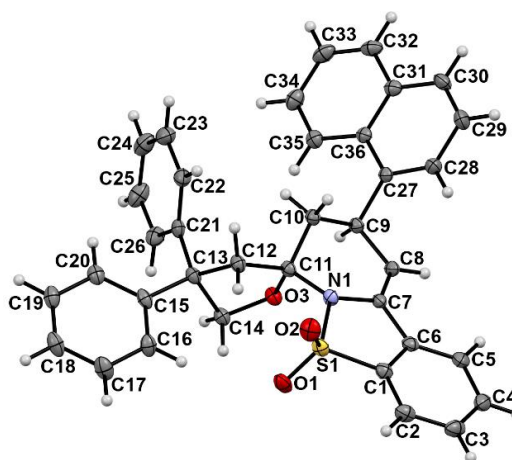

**Figure 3.** ORTEP diagram of compound **8gb**, the asymmetric unit contains a single molecule. Herein, the ellipsoids are drawn with a 50% probability.

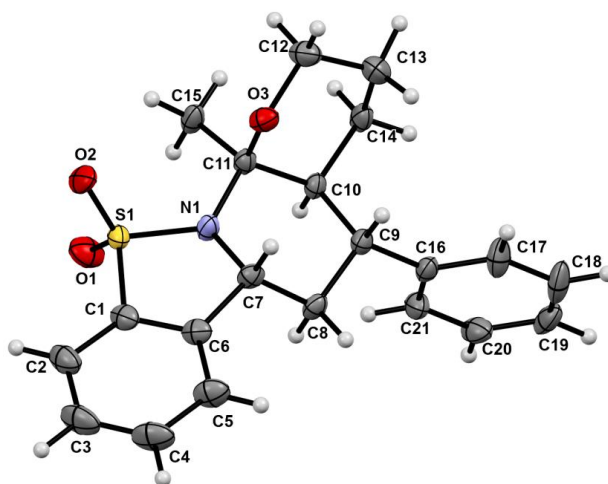

**Figure 4.** ORTEP diagram of compound **10aa**, the asymmetric unit contains a single molecule. Herein, the ellipsoids are drawn with a 50% probability.

**Table 1.** Crystallographic information details of compounds **6ab**, **6dj**, **8gb** and **10aa**.

| Crystal data                                                      | <b>6ab</b>                                        | <b>6dj</b>                                        | <b>8gb</b>                                        | <b>10aa</b>                                       |
|-------------------------------------------------------------------|---------------------------------------------------|---------------------------------------------------|---------------------------------------------------|---------------------------------------------------|
| Chemical formula                                                  | C <sub>25</sub> H <sub>23</sub> NO <sub>3</sub> S | C <sub>23</sub> H <sub>25</sub> NO <sub>4</sub> S | C <sub>36</sub> H <sub>29</sub> NO <sub>3</sub> S | C <sub>21</sub> H <sub>23</sub> NO <sub>3</sub> S |
| Formula weight (M <sub>r</sub> )                                  | 417.50                                            | 411.50                                            | 555.66                                            | 369.46                                            |
| Crystal system                                                    | Monoclinic                                        | Monoclinic                                        | Monoclinic                                        | Orthorhombic                                      |
| Space group                                                       | <i>P2<sub>1</sub>/n</i>                           | <i>P2<sub>1</sub>/n</i>                           | <i>P2<sub>1</sub>/c</i>                           | <i>P2<sub>1</sub>2<sub>1</sub>2<sub>1</sub></i>   |
| Temperature T (K)                                                 | 100                                               | 100                                               | 100                                               | 100                                               |
| a (Å)                                                             | 10.9271 (10)                                      | 10.2361 (15)                                      | 18.5043 (18)                                      | 10.2093 (5)                                       |
| b (Å)                                                             | 16.5749 (17)                                      | 18.336 (3)                                        | 8.0564 (8)                                        | 12.4520 (6)                                       |
| c (Å)                                                             | 10.9904 (10)                                      | 10.7234 (18)                                      | 18.6190 (19)                                      | 14.4031 (6)                                       |
| α (°)                                                             | 90                                                | 90                                                | 90                                                | 90                                                |
| β (°)                                                             | 93.352 (3)                                        | 98.878 (7)                                        | 103.185 (4)                                       | 90                                                |
| γ (°)                                                             | 90                                                | 90                                                | 90                                                | 90                                                |
| Z                                                                 | 4                                                 | 4                                                 | 4                                                 | 4                                                 |
| Volume (Å <sup>3</sup> )                                          | 1987.1 (3)                                        | 1988.6 (6)                                        | 2702.5 (5)                                        | 1831.01 (15)                                      |
| Source of radiation                                               | MoKα                                              | MoKα                                              | MoKα                                              | CuKα                                              |
| D <sub>calc</sub> (Mg m <sup>-3</sup> )                           | 1.396                                             | 1.375                                             | 1.366                                             | 1.340                                             |
| Crystal size (mm)                                                 | 0.16×0.12×0.1                                     | 0.16×0.09×0.08                                    | 0.23×0.12×0.09                                    | 0.23×0.12×0.09                                    |
| μ (mm <sup>-1</sup> )                                             | 0.19                                              | 0.19                                              | 0.16                                              | 1.74                                              |
| <b>Data collection</b>                                            |                                                   |                                                   |                                                   |                                                   |
| Diffractometer                                                    | Bruker D8 VENTURE Kappa Duo PHOTON II CPAD        | Bruker D8 VENTURE Kappa Duo PHOTON II CPAD        | Bruker D8 VENTURE Kappa Duo PHOTON II CPAD        | Bruker D8 VENTURE Kappa Duo PHOTON II CPAD        |
| Absorption correction                                             | Multi-scan (SADABS; Bruker, 2016)                 |
| T <sub>min</sub> , T <sub>max</sub>                               | 0.711, 0.746                                      | 0.705, 0.746                                      | 0.694, 0.739                                      | 0.5105, 0.7543                                    |
| No. of measured, independent and observed [I > 2σ(I)] reflections | 95965, 4321, 4113                                 | 107127, 4308, 4173                                | 132550, 5900, 5062                                | 71574, 3884, 3878                                 |

|                                                               |              |              |              |              |
|---------------------------------------------------------------|--------------|--------------|--------------|--------------|
| Theta range (°)                                               | 2.46–27.49   | 2.30–27.49   | 2.26–28.49   | 7.11–79.76   |
| R <sub>int</sub>                                              | 0.055        | 0.043        | 0.097        | 0.053        |
| <b>Refinement</b>                                             |              |              |              |              |
| R[F <sup>2</sup> > 2σ (F <sup>2</sup> )], wR(F <sup>2</sup> ) | 0.046, 0.130 | 0.034, 0.109 | 0.043, 0.105 | 0.034, 0.087 |
| GOF on F <sup>2</sup>                                         | 1.18         | 1.19         | 1.06         | 1.07         |
| No. of independent reflections                                | 4321         | 4308         | 5900         | 3884         |
| No. of parameters                                             | 273          | 266          | 371          | 237          |
| F <sub>000</sub>                                              | 880          | 872          | 1168         | 784          |
| No. of restraints                                             | 0            | 0            | 0            | 0            |
| H-atom treatment                                              | Constr       | Constr       | Constr       | Constr       |
| Δρ <sub>max</sub> , Δρ <sub>min</sub> (e Å <sup>-3</sup> )    | 0.63, -0.57  | 0.51, -0.39  | 0.49, -0.40  | 0.47, -0.38  |
| CCDC number                                                   | 2184885      | 2184884      | 2184883      | 2269306      |

**Table 2.** Hydrogen-bond geometry (Å°, °) of **6ab**, **6dj**, **8gb** and **10aa** components are given below.

| Name of the compound | D–H⋯A       | D–H    | H⋯A    | D⋯A        | D–H⋯A |
|----------------------|-------------|--------|--------|------------|-------|
| <b>6ab</b>           | C5–H5⋯O3    | 0.9500 | 2.5400 | 3.252(2)   | 132   |
|                      | C11–H11⋯O1  | 0.9500 | 2.4500 | 3.382(2)   | 168   |
|                      | C12–H12C⋯O2 | 0.9800 | 2.4900 | 3.061(2)   | 117   |
|                      | C15–H15B⋯O1 | 0.9900 | 2.4700 | 3.202(2)   | 131   |
| <b>6dj</b>           | C10–H10⋯O2  | 1.0000 | 2.4800 | 3.3882(17) | 151   |
|                      | C12–H12A⋯O2 | 0.9800 | 2.4400 | 3.1143(17) | 125   |
|                      | C12–H12C⋯O1 | 0.9800 | 2.4900 | 3.3736(17) | 150   |
|                      | C22–H22⋯O1  | 1.0000 | 2.3800 | 3.1239(16) | 130   |
|                      | C23–H23B⋯O2 | 0.9800 | 2.5700 | 3.4433(18) | 149   |
| <b>8gb</b>           | C2–H2⋯O1    | 0.9500 | 2.3500 | 3.210(2)   | 150   |
|                      | C12–H12B⋯O2 | 0.9900 | 2.5800 | 3.341(2)   | 134   |
|                      | C14–H14A⋯O1 | 0.9900 | 2.4500 | 3.184(2)   | 130   |
| <b>10aa</b>          | C4–H4⋯O2    | 0.950  | 2.590  | 3.2266(2)  | 124   |
|                      | C7–H7⋯O3    | 1.000  | 2.520  | 2.8634(1)  | 100   |
|                      | C9–H9⋯O1    | 1.000  | 2.530  | 3.3424(2)  | 138   |

|  |               |       |       |           |     |
|--|---------------|-------|-------|-----------|-----|
|  | C15–H15A···O2 | 0.980 | 2.570 | 3.1892(2) | 121 |
|  | C15–H15B···O1 | 0.980 | 2.570 | 3.0999(2) | 114 |
|  | C18–H18···O2  | 0.950 | 2.570 | 3.3661(2) | 142 |
|  | C20–H20···O2  | 0.950 | 2.590 | 3.1930(2) | 121 |

## References

1. G. M. Sheldrick, Crystal structure refinement with SHELXL, *Acta Cryst.* (2015). C71, 3–8.
2. G. M. Sheldrick, SHELXT - Integrated space-group and crystal-structure determination, *Acta Cryst.* (2015). A71, 3–8

# 14. $^1\text{H}$ , $^{13}\text{C}$ and 2D NMR Spectra

**12a-Methyl-5-phenyl-3,4,4a,12a-tetrahydro-2H,5H-benzo[4,5]isothiazolo[2,3-a]pyrano[3,2-e]pyridine 11,11-dioxide (6aa):**

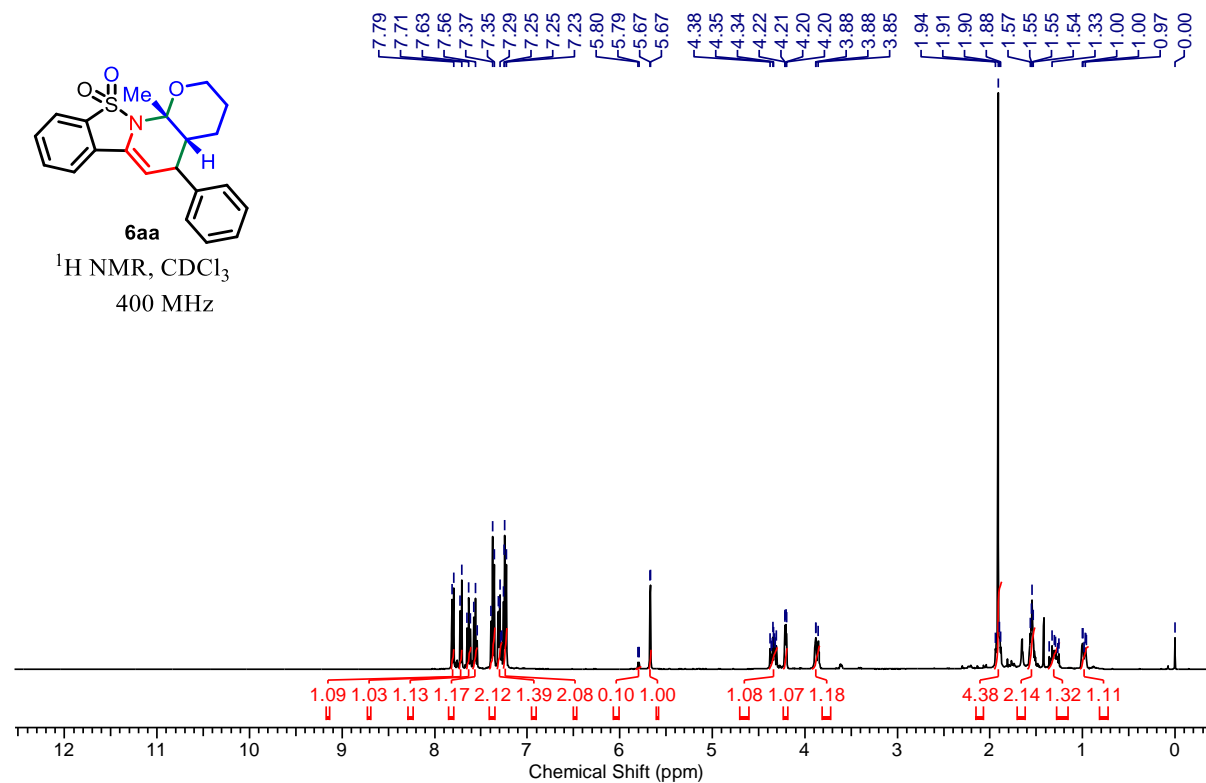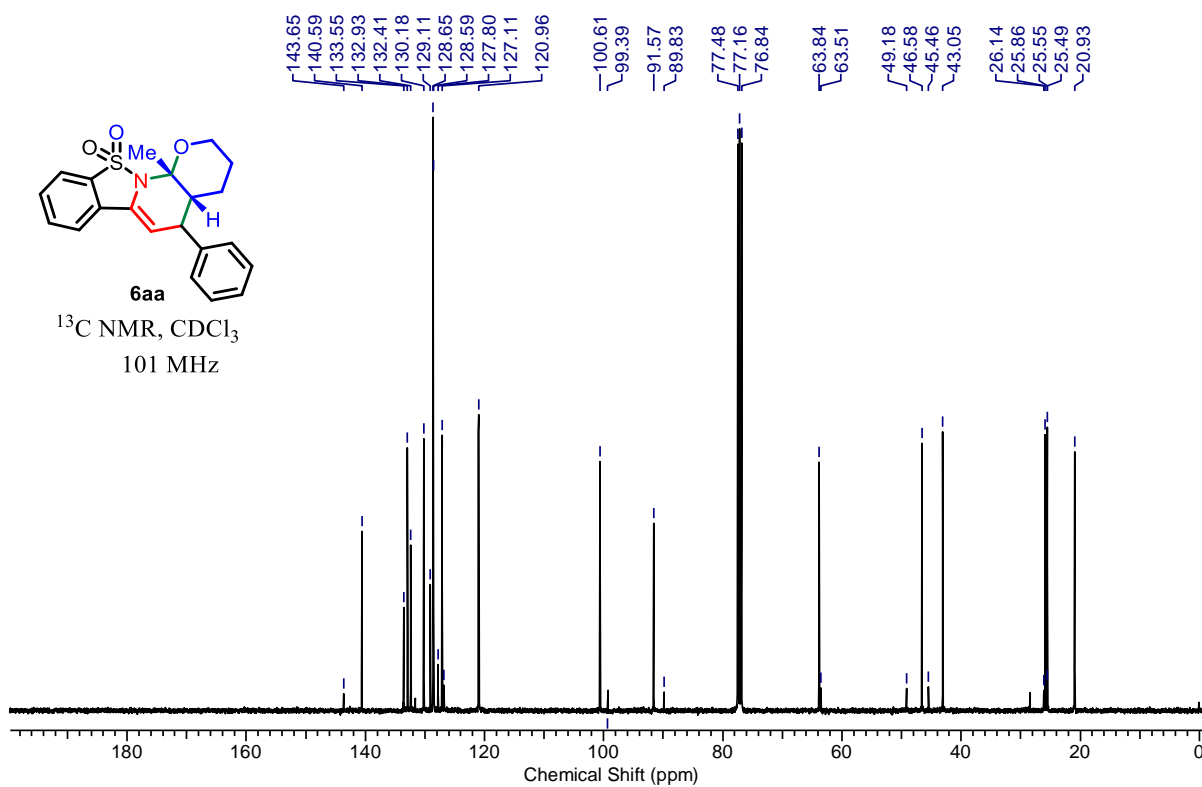

**12a-Methyl-5-(naphthalen-1-yl)-3,4,4a,12a-tetrahydro-2H,5H-benzo[4,5]isothiazolo[2,3-a]pyrano[3,2-e]pyridine 11,11-dioxide (6ab):**

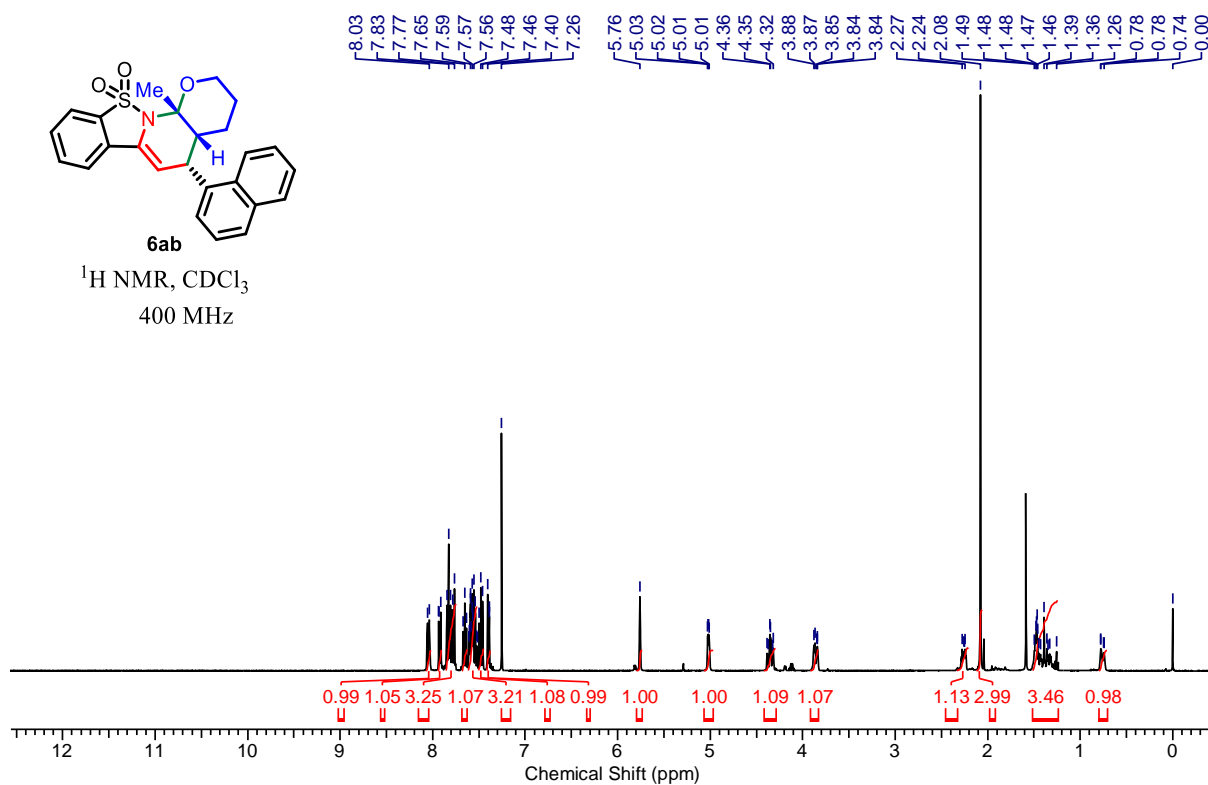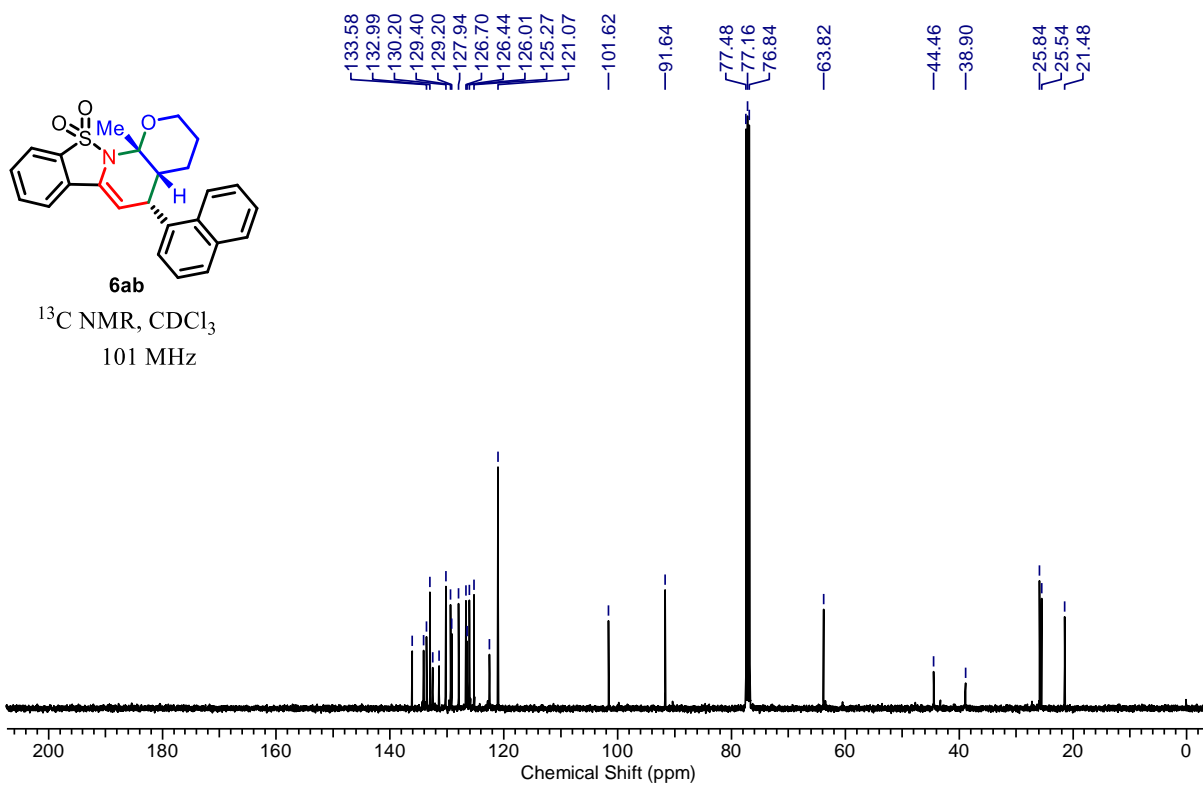

**12a-Methyl-5-(naphthalen-2-yl)-3,4,4a,12a-tetrahydro-2H,5H-benzo[4,5]isothiazolo[2,3-a]pyrano[3,2-e]pyridine 11,11-dioxide (6ac):**

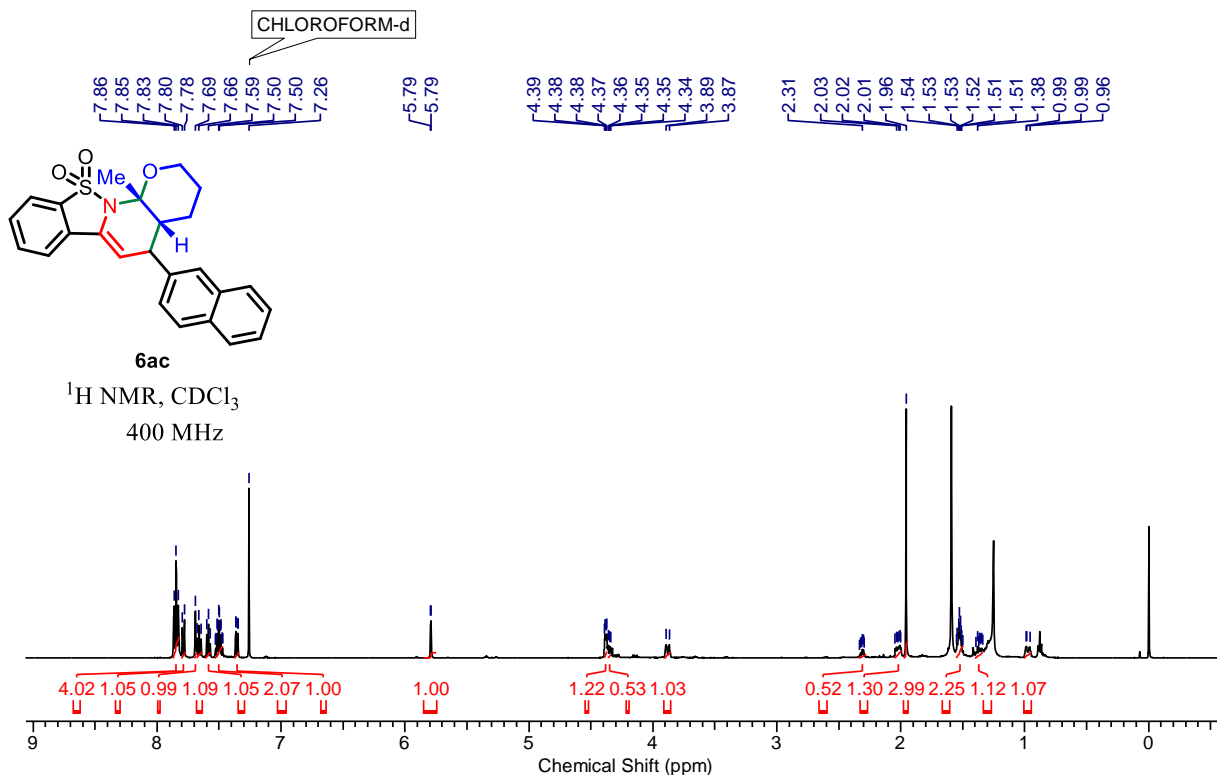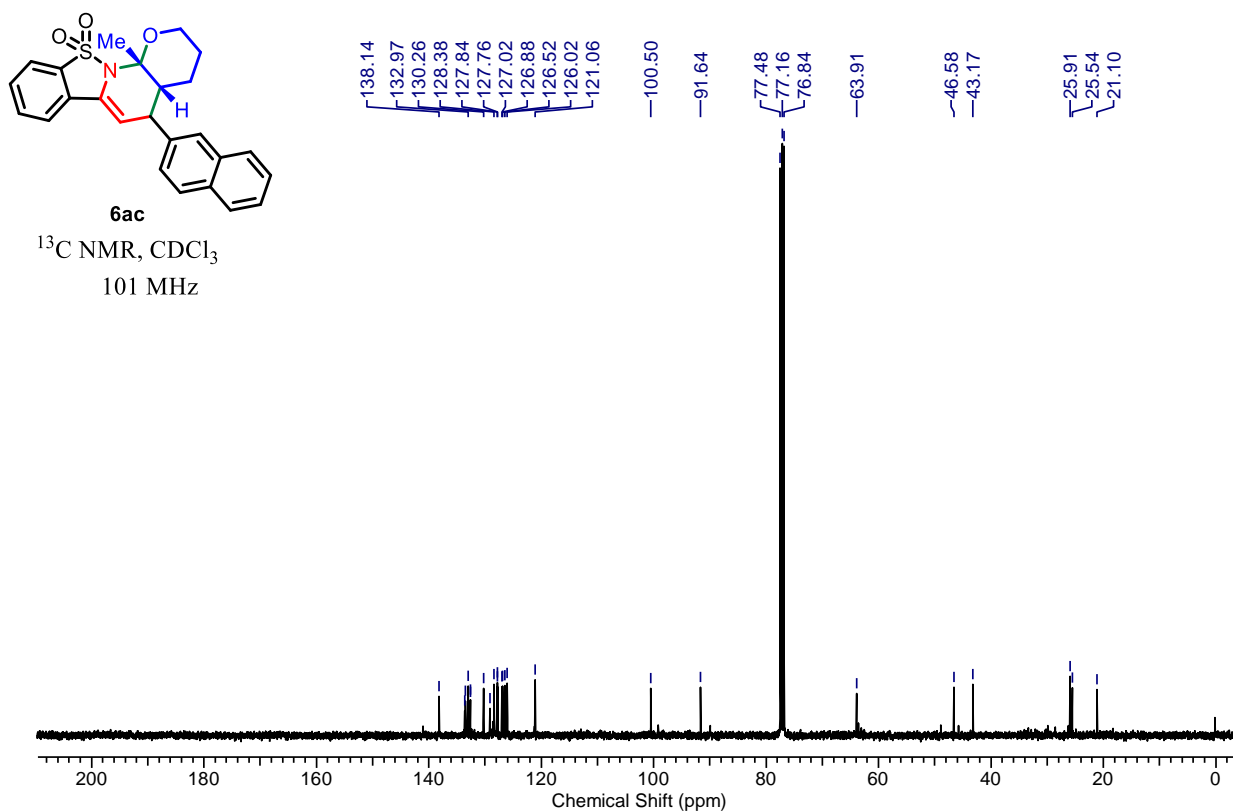



**5-(Anthracen-9-yl)-12a-methyl-3,4,4a,12a-tetrahydro-2H,5H-benzo[4,5]isothiazolo[2,3-a]pyrano[3,2-e]pyridine 11,11-dioxide (6ad):**

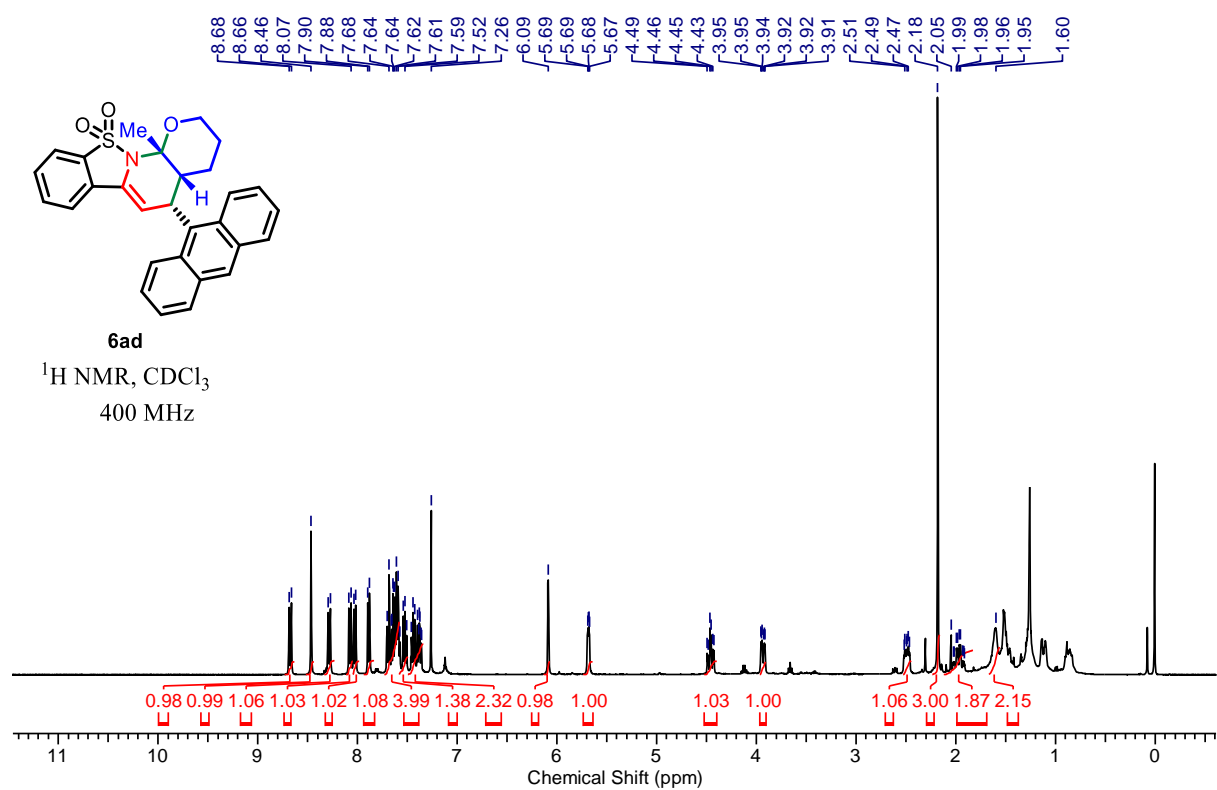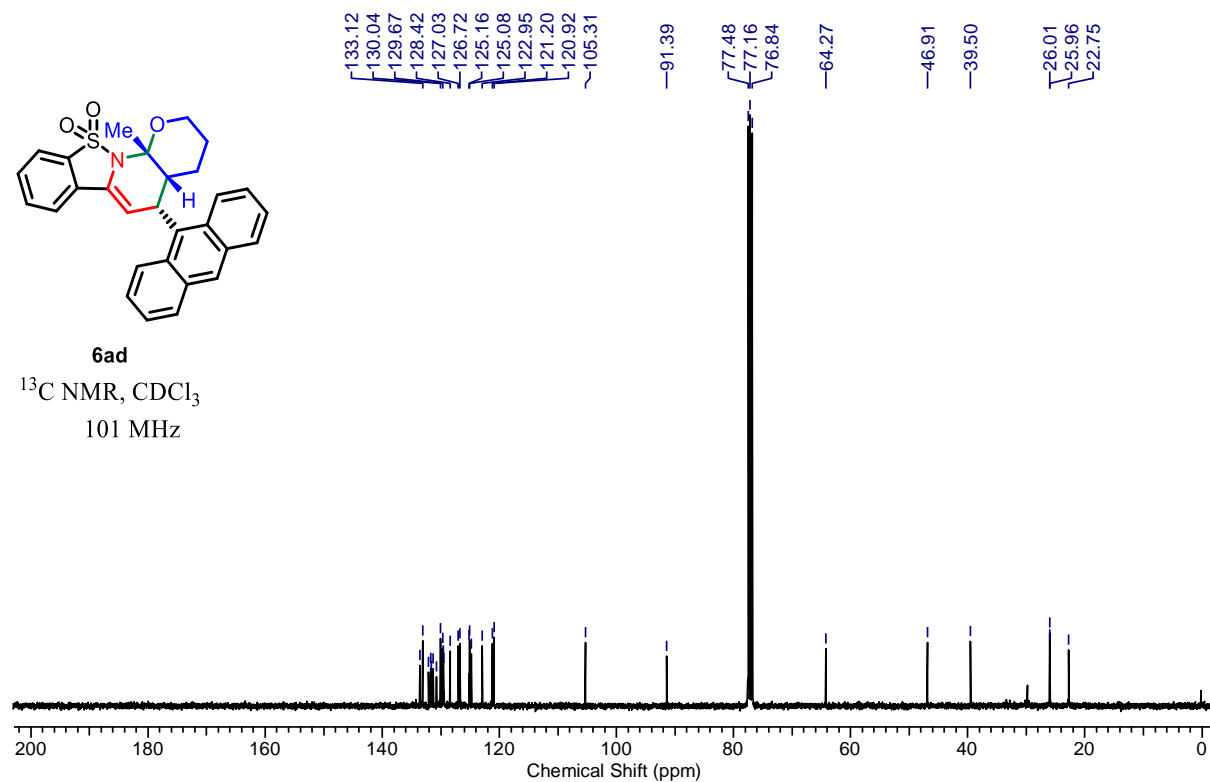

**5-([1,1'-Biphenyl]-4-yl)-12a-methyl-3,4,4a,12a-tetrahydro-2H,5H-benzo[4,5]isothiazolo[2,3-a]pyrano[3,2-e]pyridine 11,11-dioxide (6ae):**

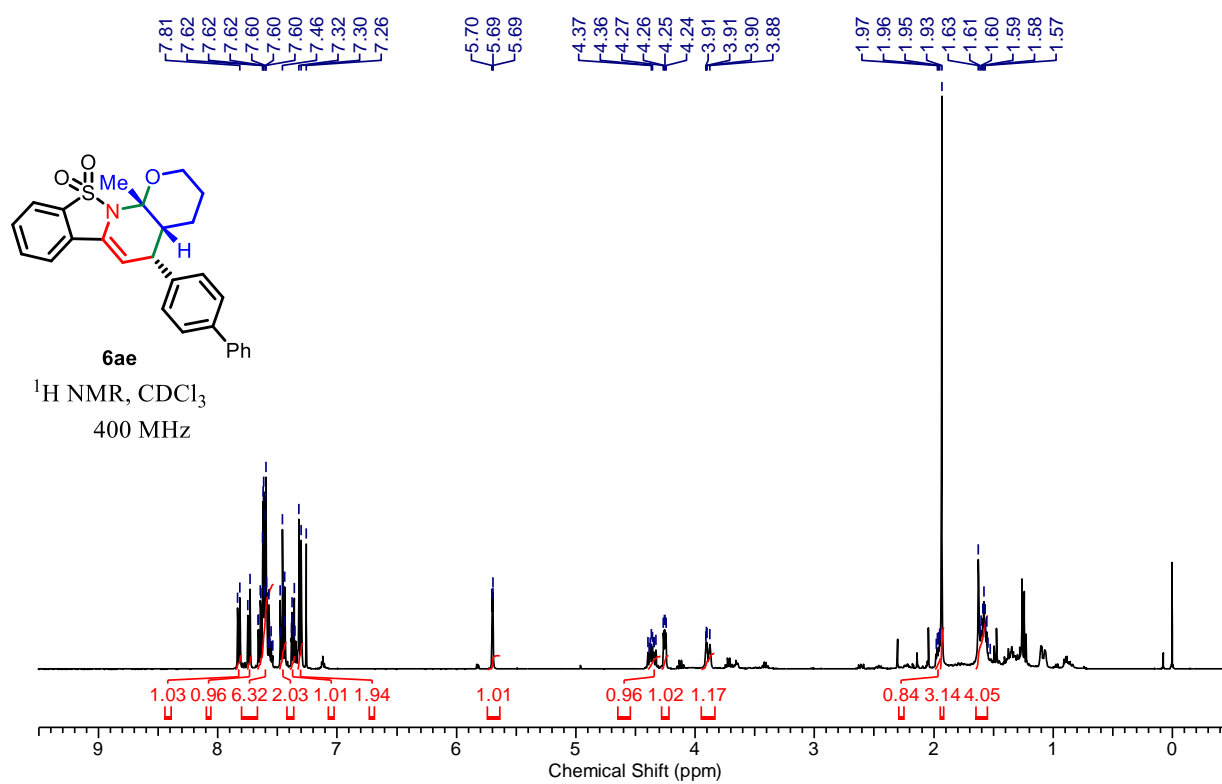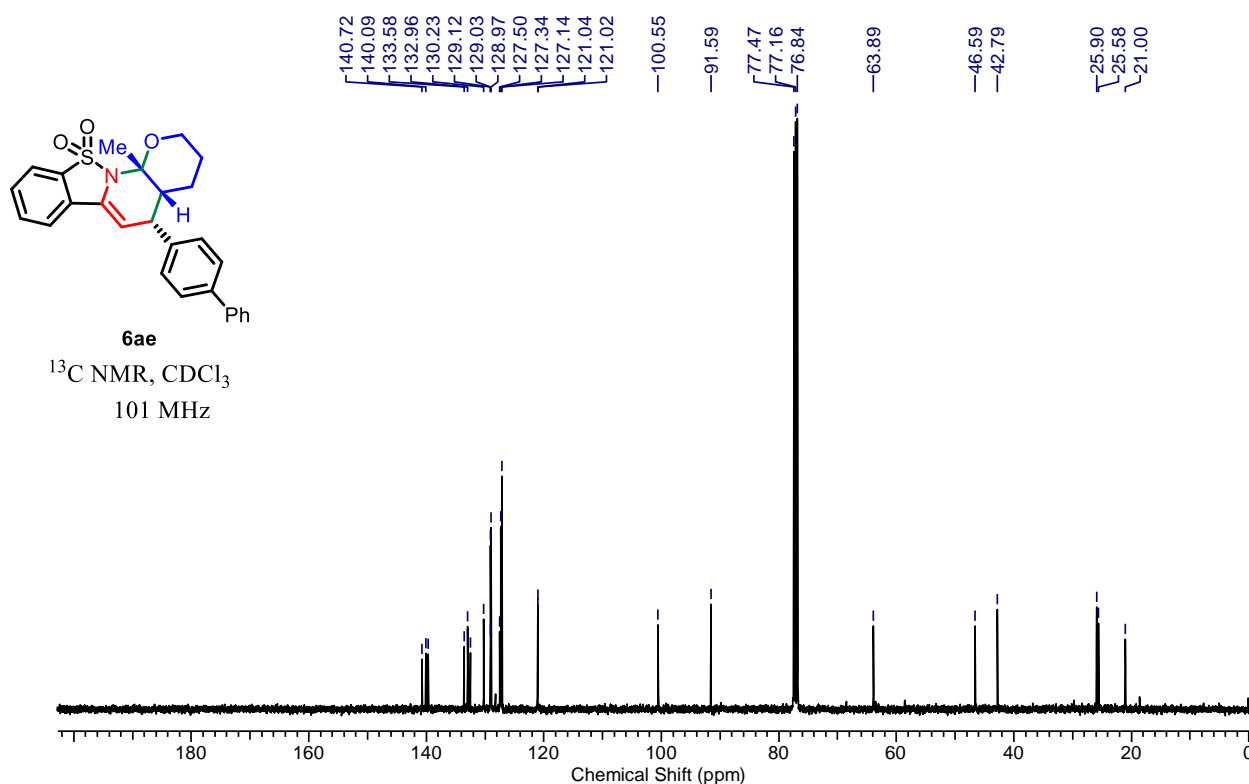

**12a-Methyl-5-(p-tolyl)-3,4,4a,12a-tetrahydro-2H,5H-benzo[4,5]isothiazolo[2,3-a]pyrano[3,2-e]pyridine 11,11-dioxide (6af):**

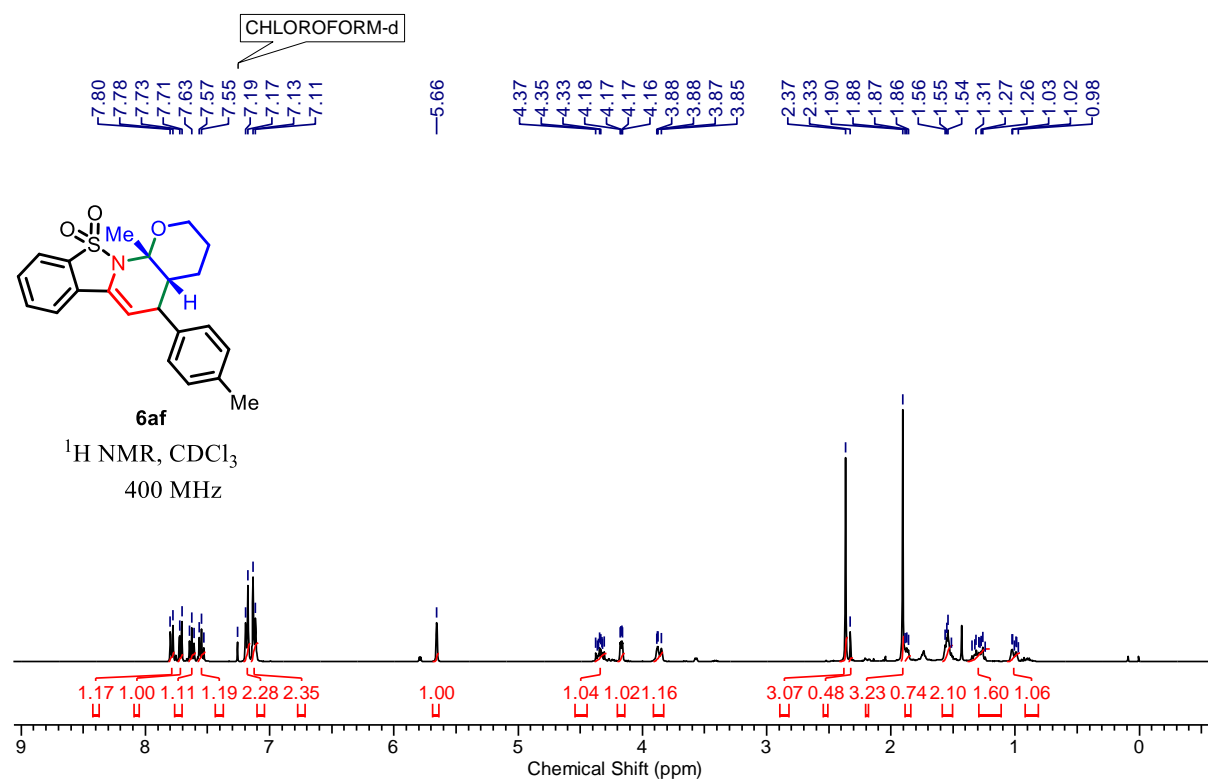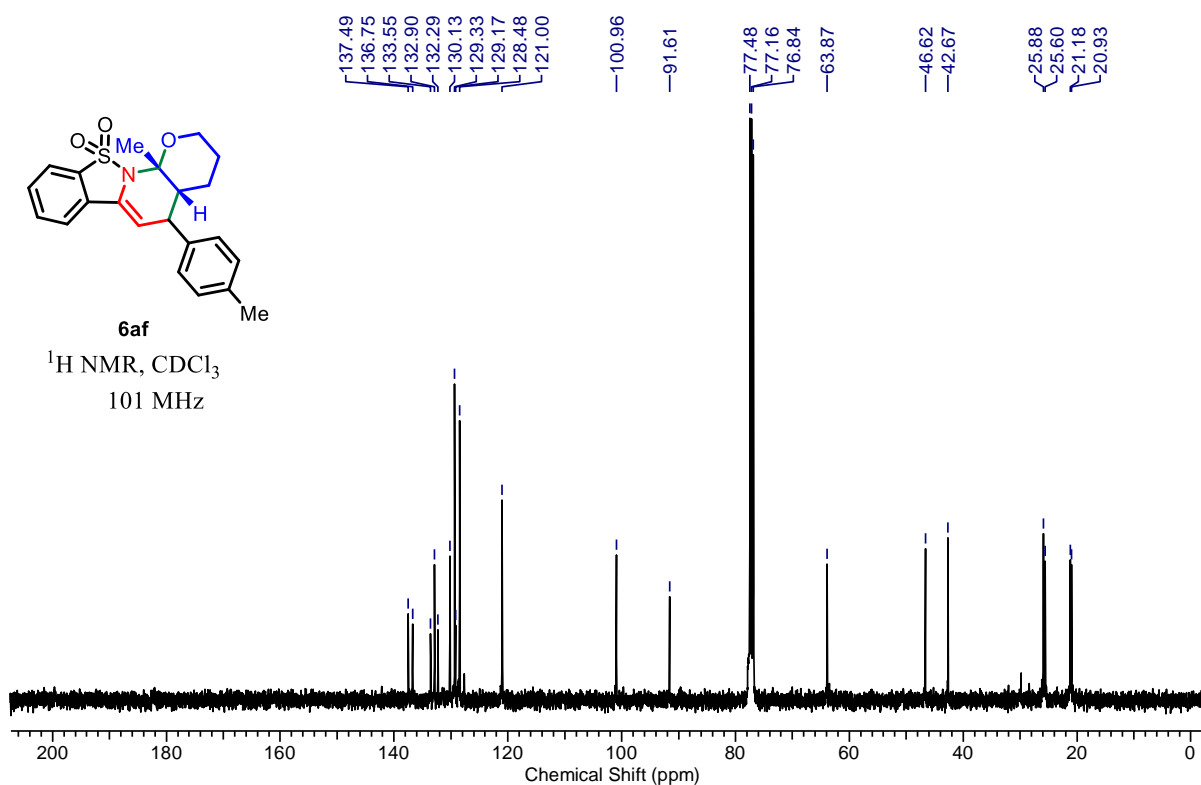

**5-(2-Bromophenyl)-12a-methyl-3,4,4a,12a-tetrahydro-2H,5H-benzo[4,5]isothiazolo[2,3-a]pyrano[3,2-e]pyridine 11,11-dioxide (6ag):**

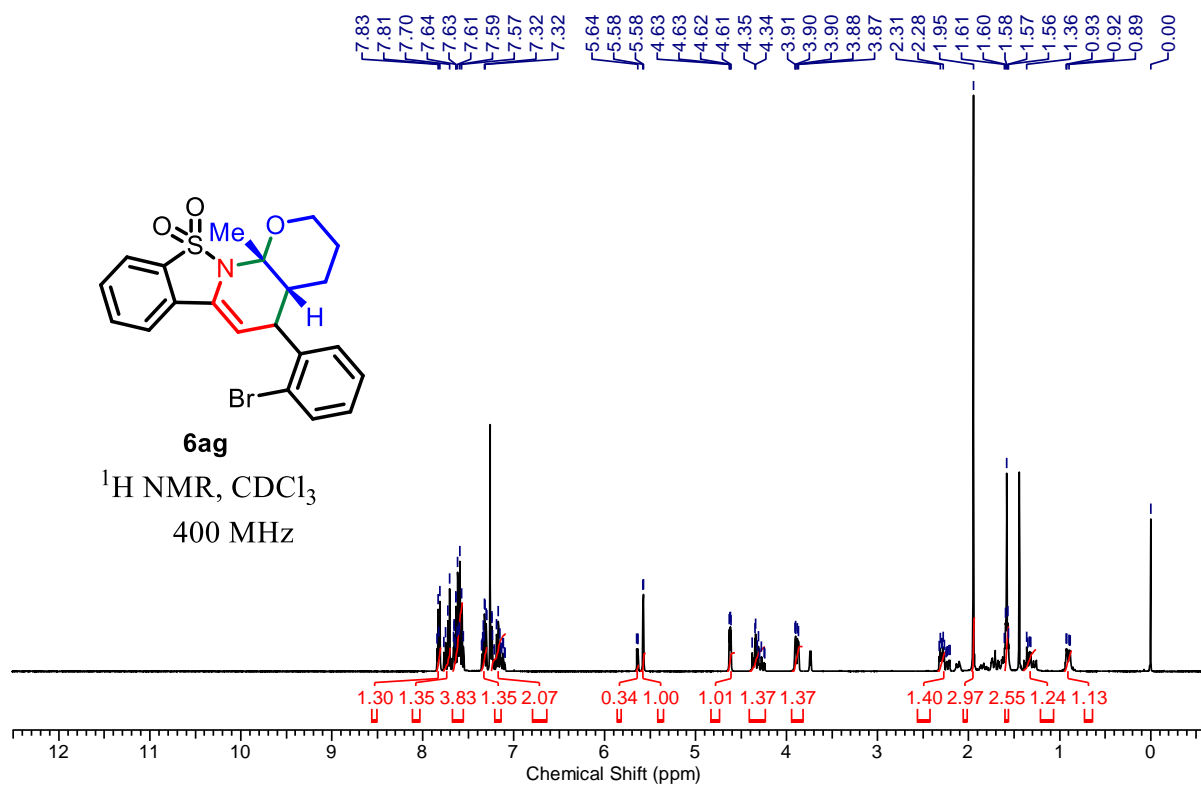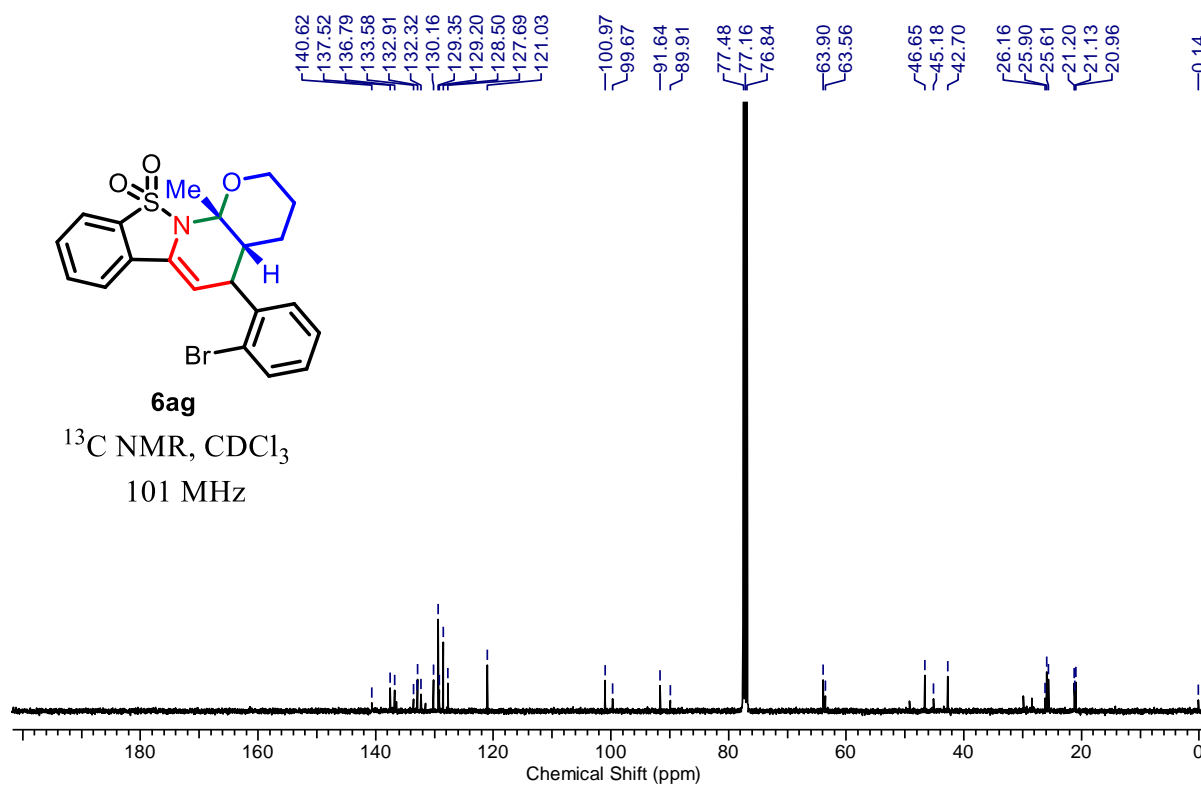

**5-(4-Chloro-2-fluorophenyl)-12a-methyl-3,4,4a,12a-tetrahydro-2H,5H-benzo[4,5]isothiazolo[2,3-a]pyrano[3,2-e]pyridine 11,11-dioxide (6ah):**

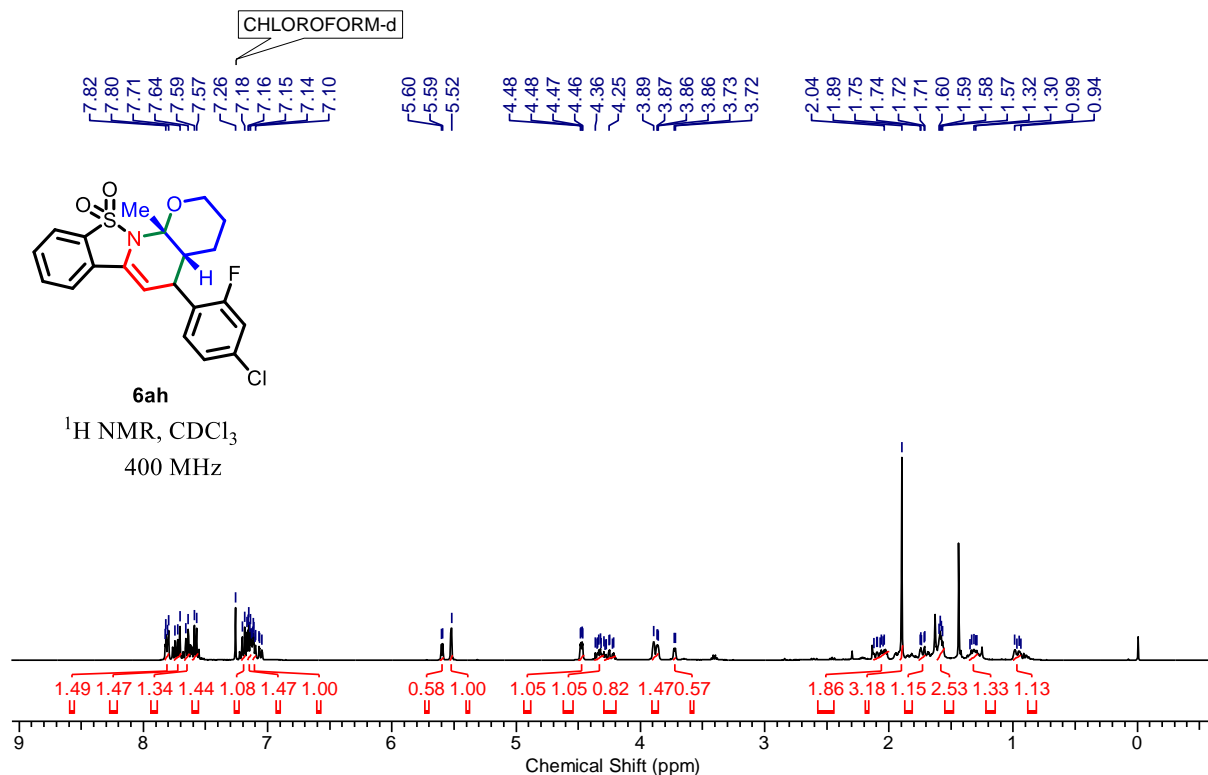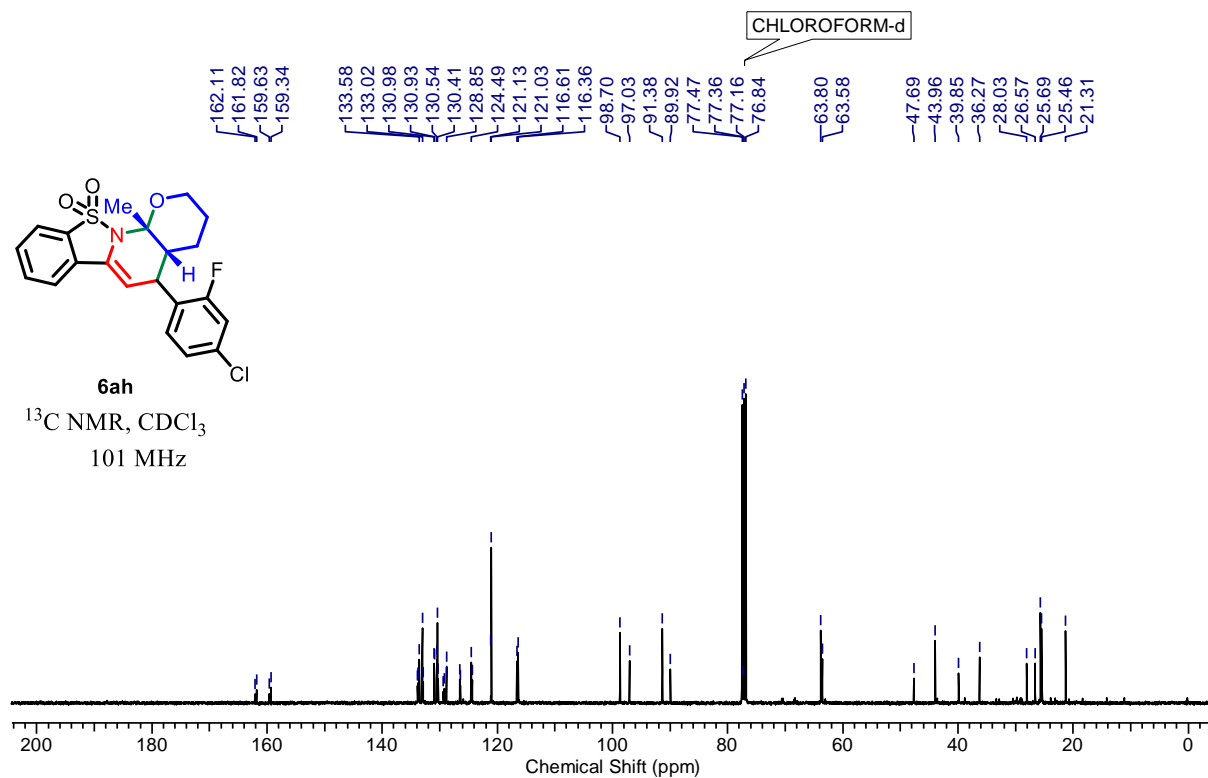

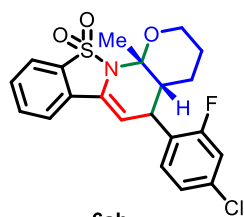

**6ah**

$^{19}\text{F}$  NMR,  $\text{CDCl}_3$

376 MHz

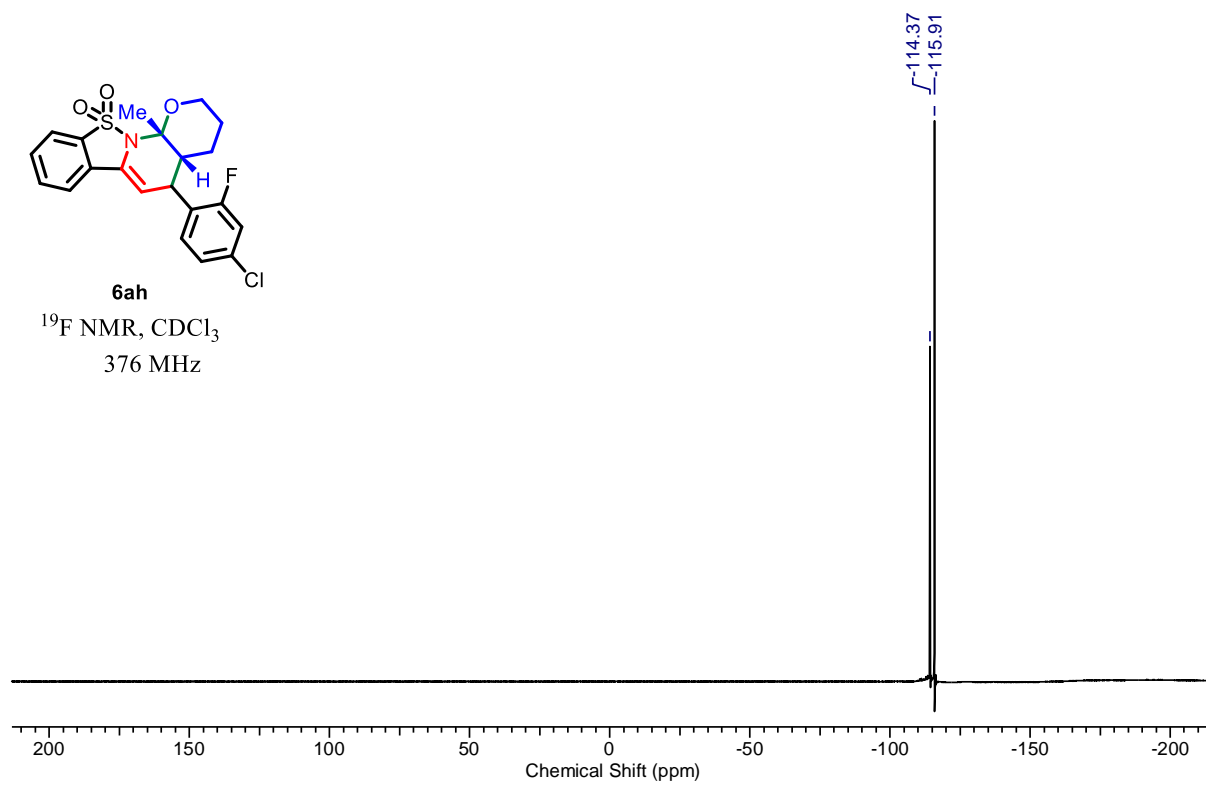

**5-(2-Methoxyphenyl)-12a-methyl-3,4,4a,12a-tetrahydro-2H,5H-benzo[4,5]isothiazolo[2,3-a]pyrano[3,2-e]pyridine 11,11-dioxide (6ai):**

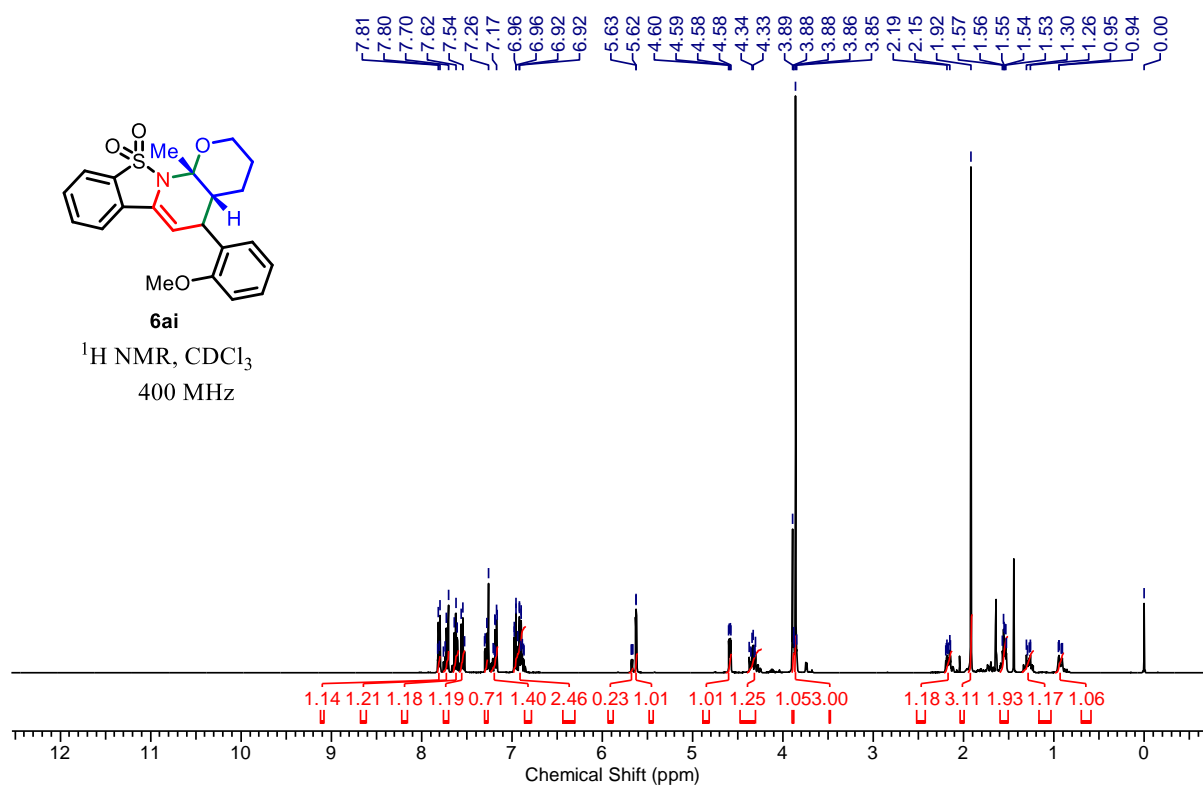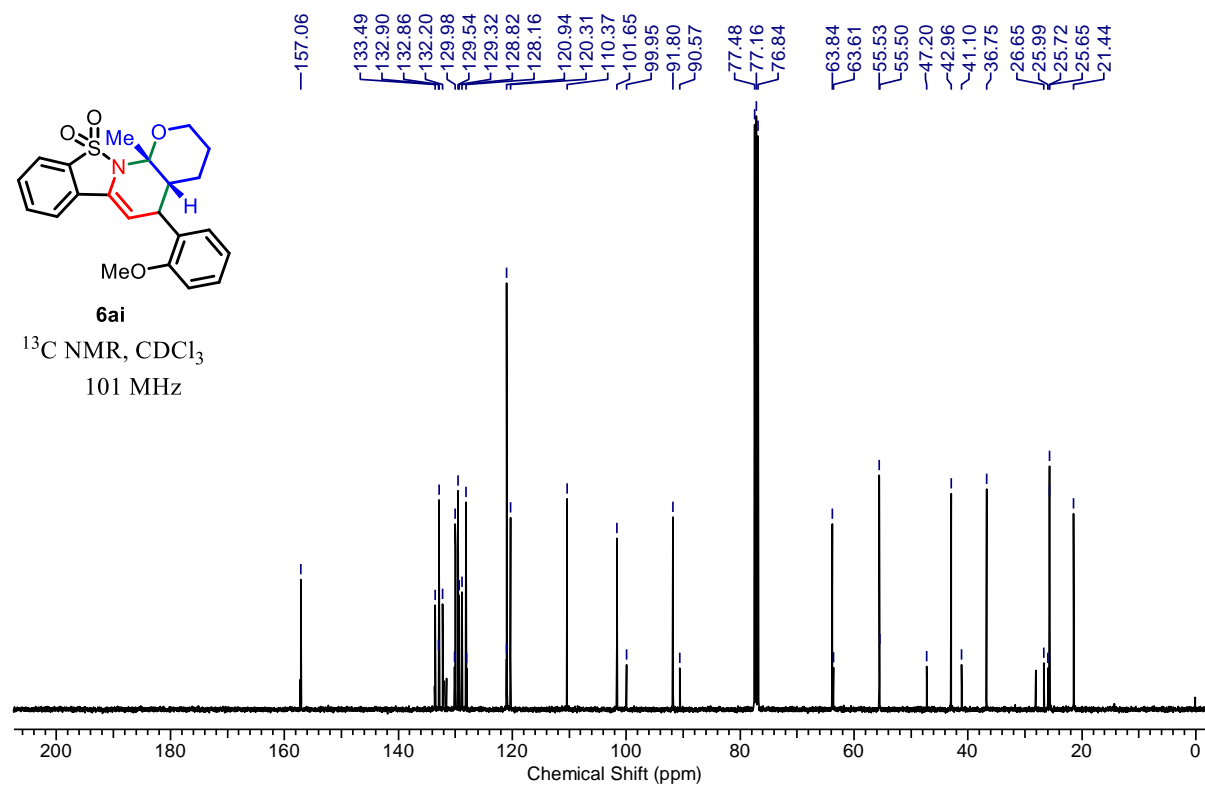



**5-(4-Methoxyphenyl)-12a-methyl-3,4,4a,12a-tetrahydro-2H,5H-benzo[4,5]isothiazolo[2,3-a]pyrano[3,2-e]pyridine 11,11-dioxide (6aj):**

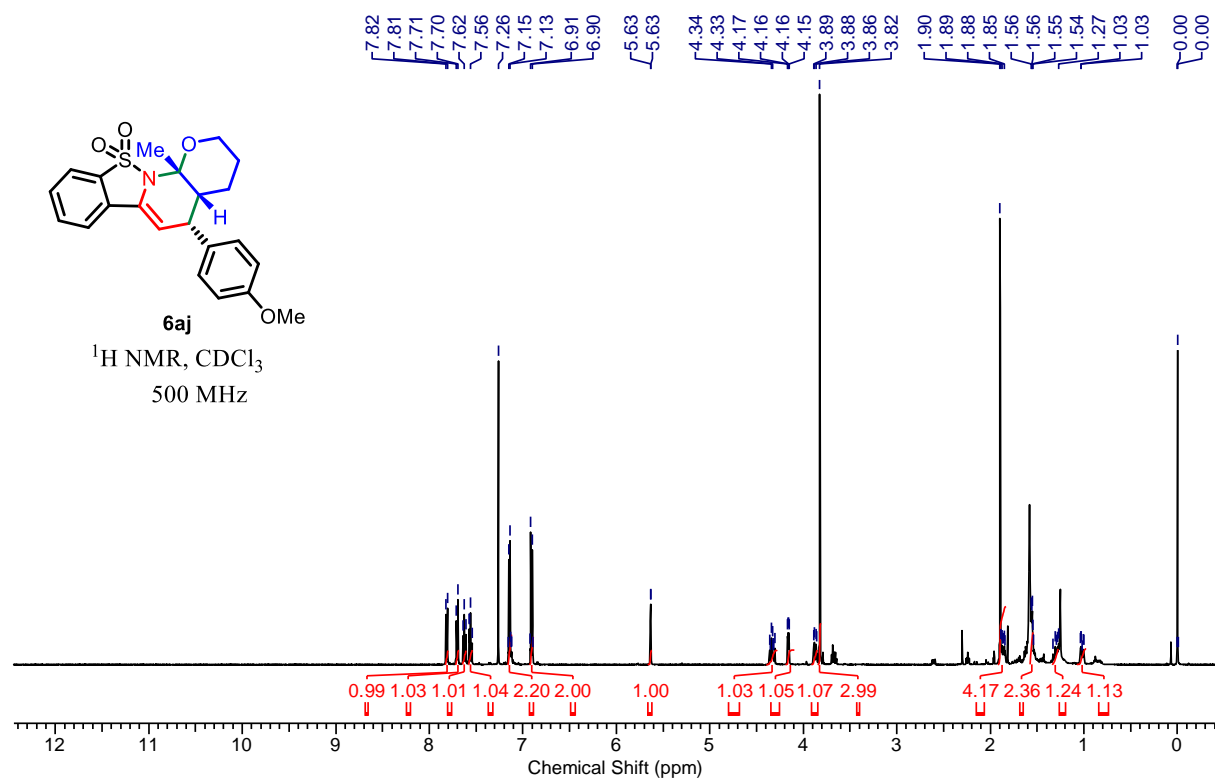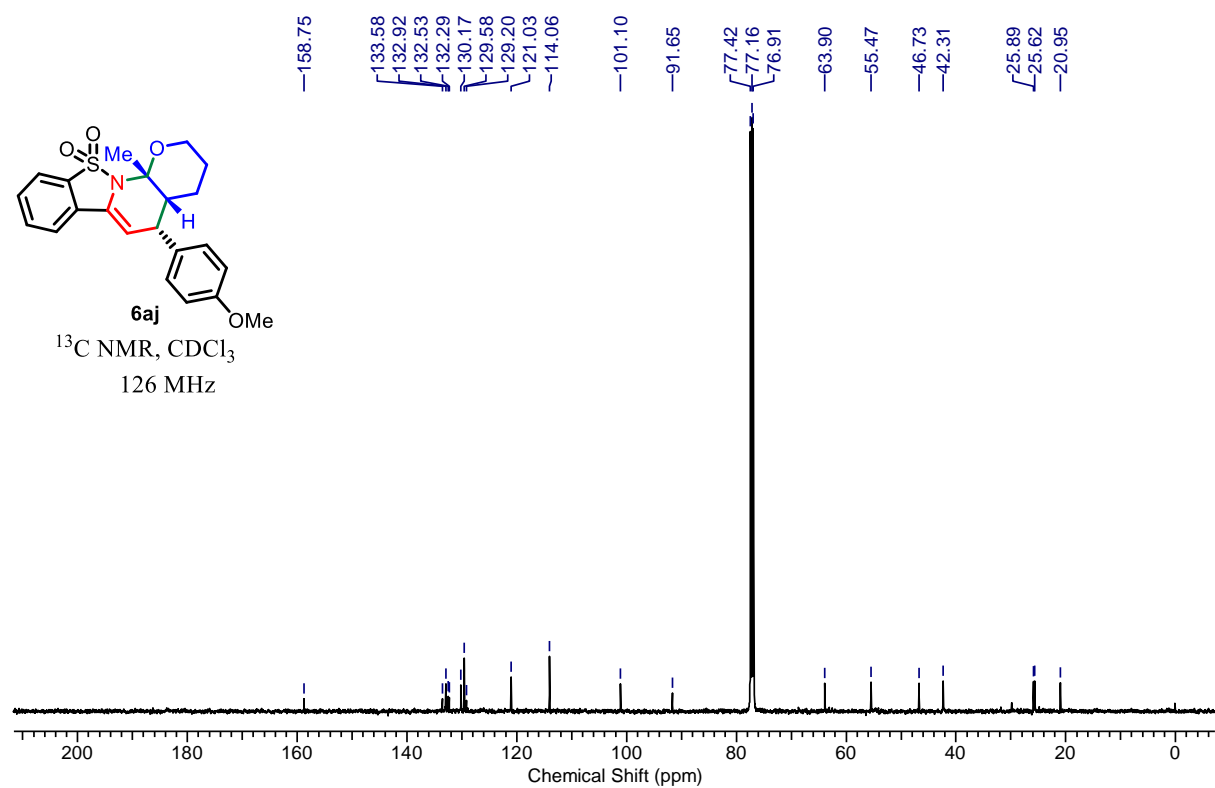

**5-(4-Methoxyphenyl)-12a-methyl-3,4,4a,12a-tetrahydro-2H,5H-benzo[4,5]isothiazolo[2,3-a]pyrano[3,2-e]pyridine 11,11-dioxide (6aj):**

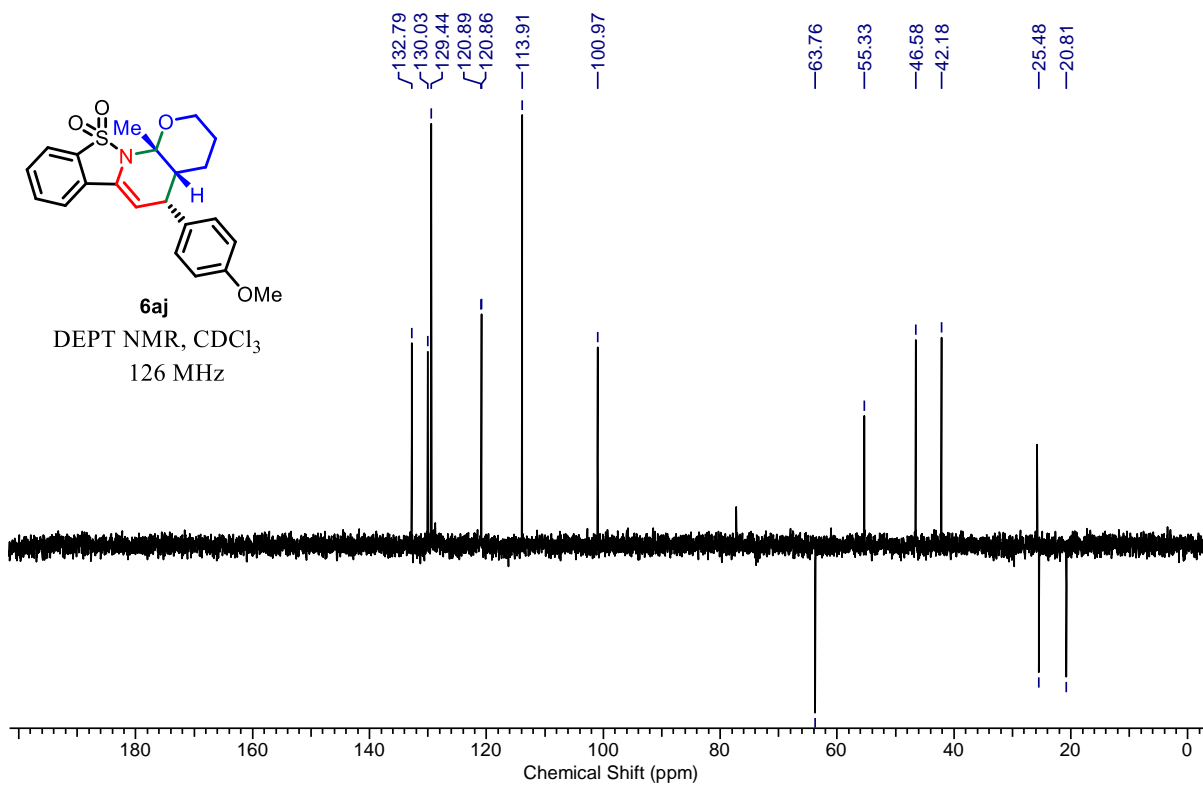

**NOESY:**

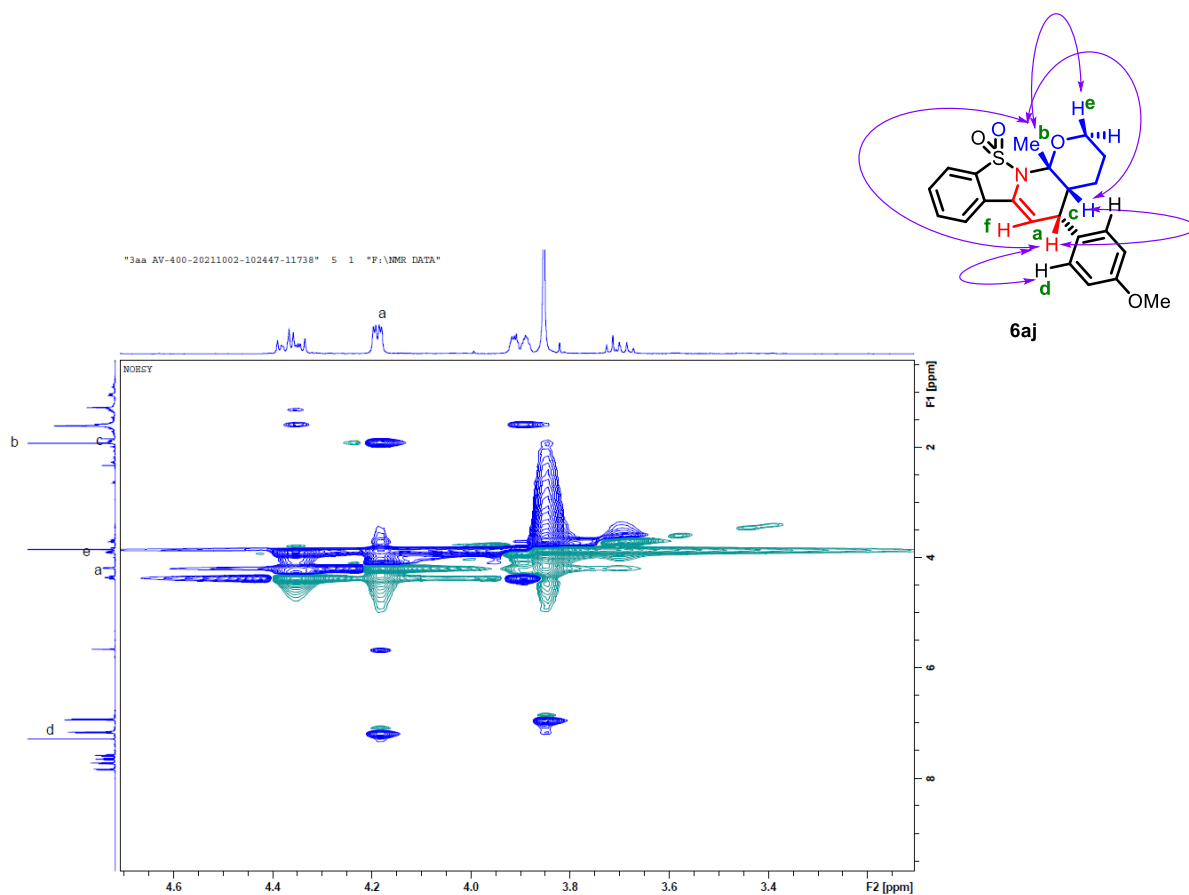

**5-(4-Methoxyphenyl)-12a-methyl-3,4,4a,12a-tetrahydro-2H,5H-benzo[4,5]isothiazolo[2,3-a]pyrano[3,2-e]pyridine 11,11-dioxide (6aj): NOESY**

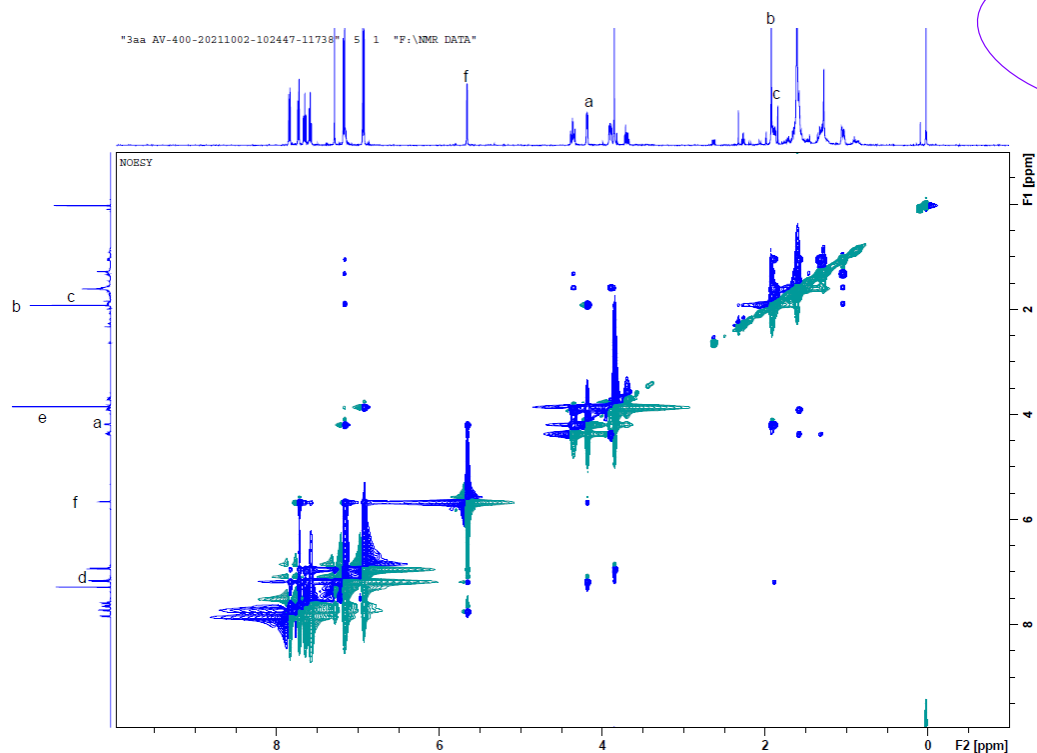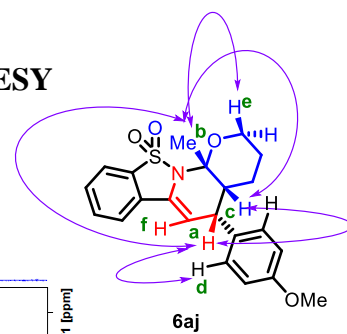

**COSY:**

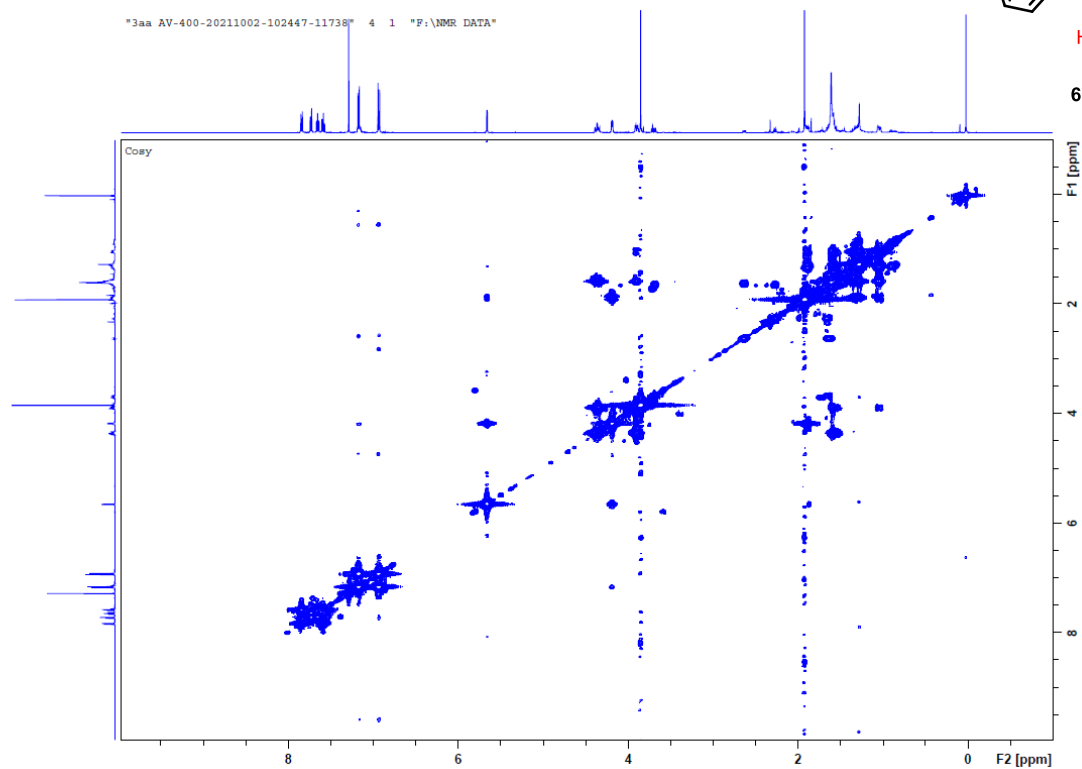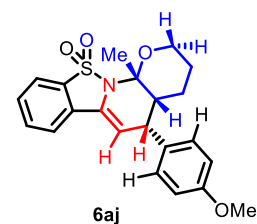

**5-(4-Methoxyphenyl)-12a-methyl-3,4,4a,12a-tetrahydro-2H,5H-benzo[4,5]isothiazolo[2,3-a]pyrano[3,2-e]pyridine 11,11-dioxide (6aj):**

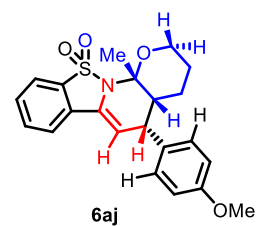

**HMBC:**

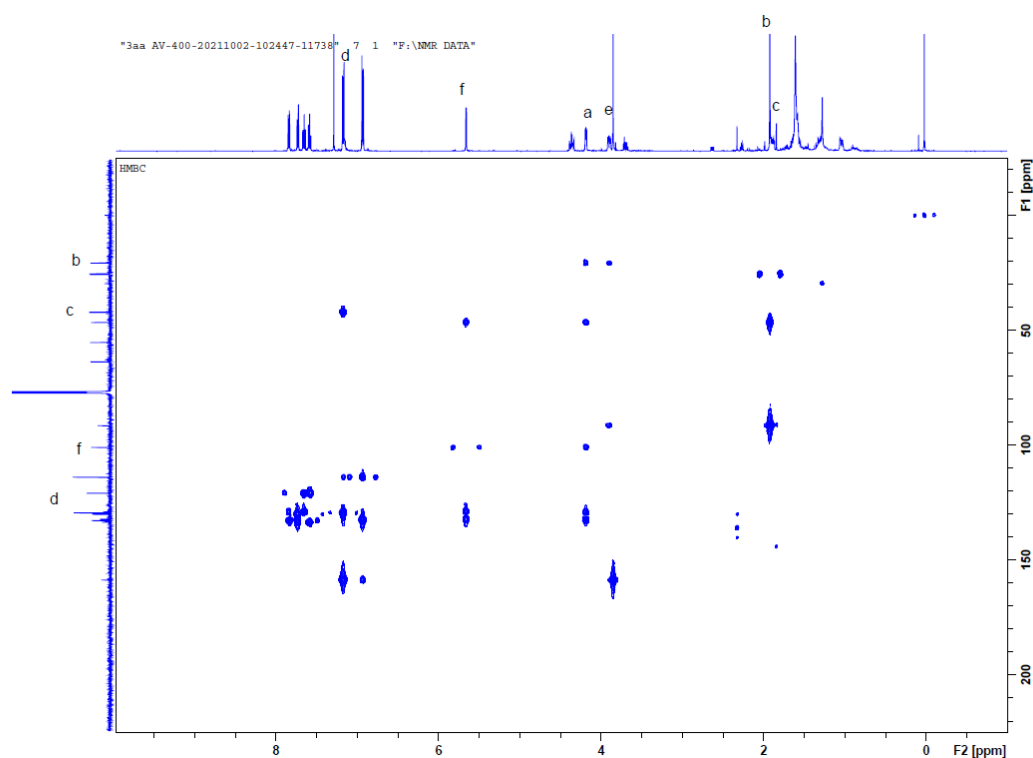

**HSQC:**

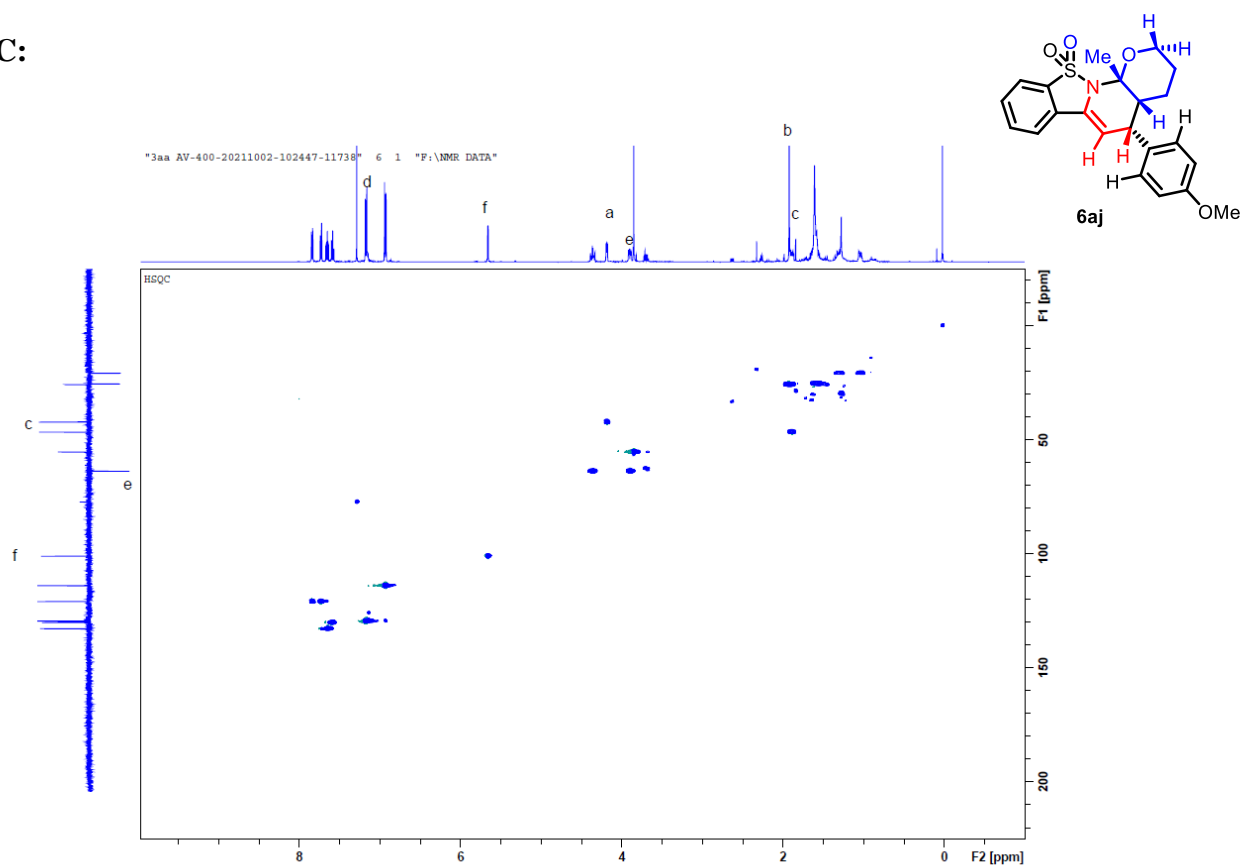

**5-(4-(Benzyloxy)phenyl)-12a-methyl-3,4,4a,12a-tetrahydro-2H,5H-benzo[4,5]isothiazolo[2,3-a]pyrano[3,2-e]pyridine 11,11-dioxide (6ak):**

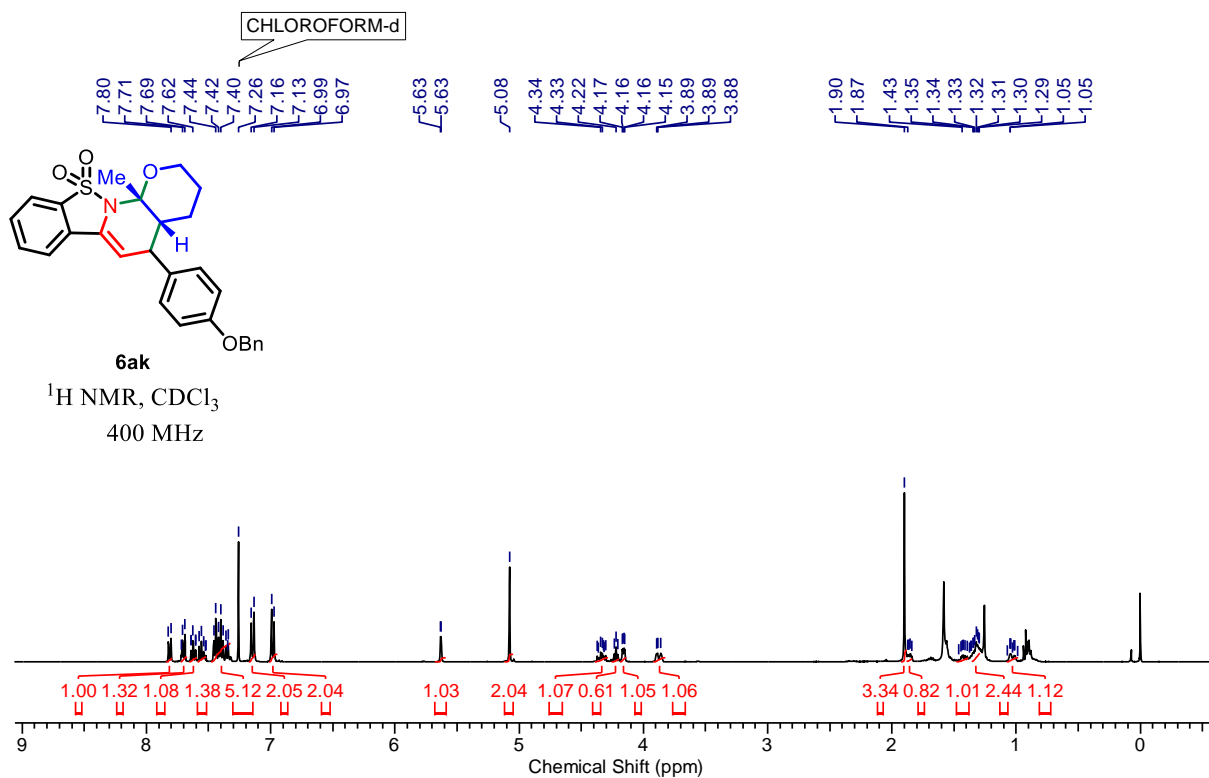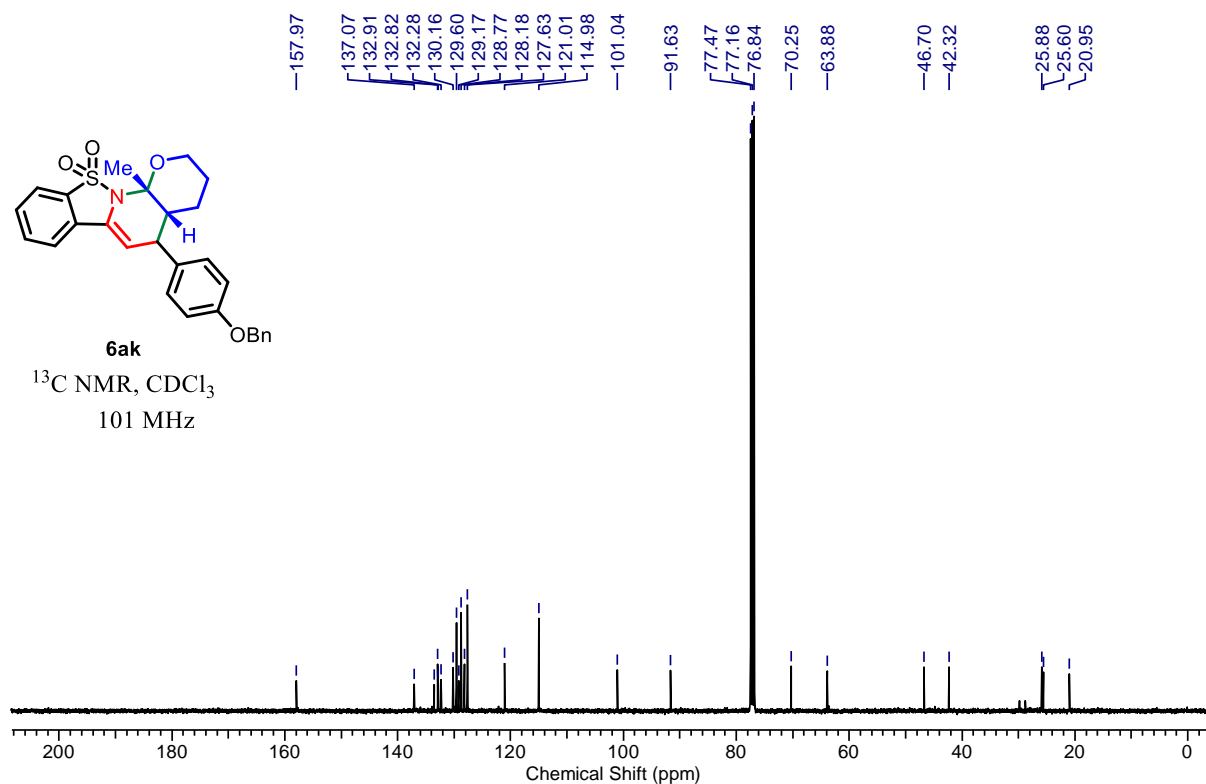

**5-(4-Methoxyphenyl)-12a-methyl-2,3,4a,12a-tetrahydro-5H-benzo[4,5]isothiazolo[2,3-a][1,4]dioxino[2,3-e]pyridine 11,11-dioxide (6bj):**

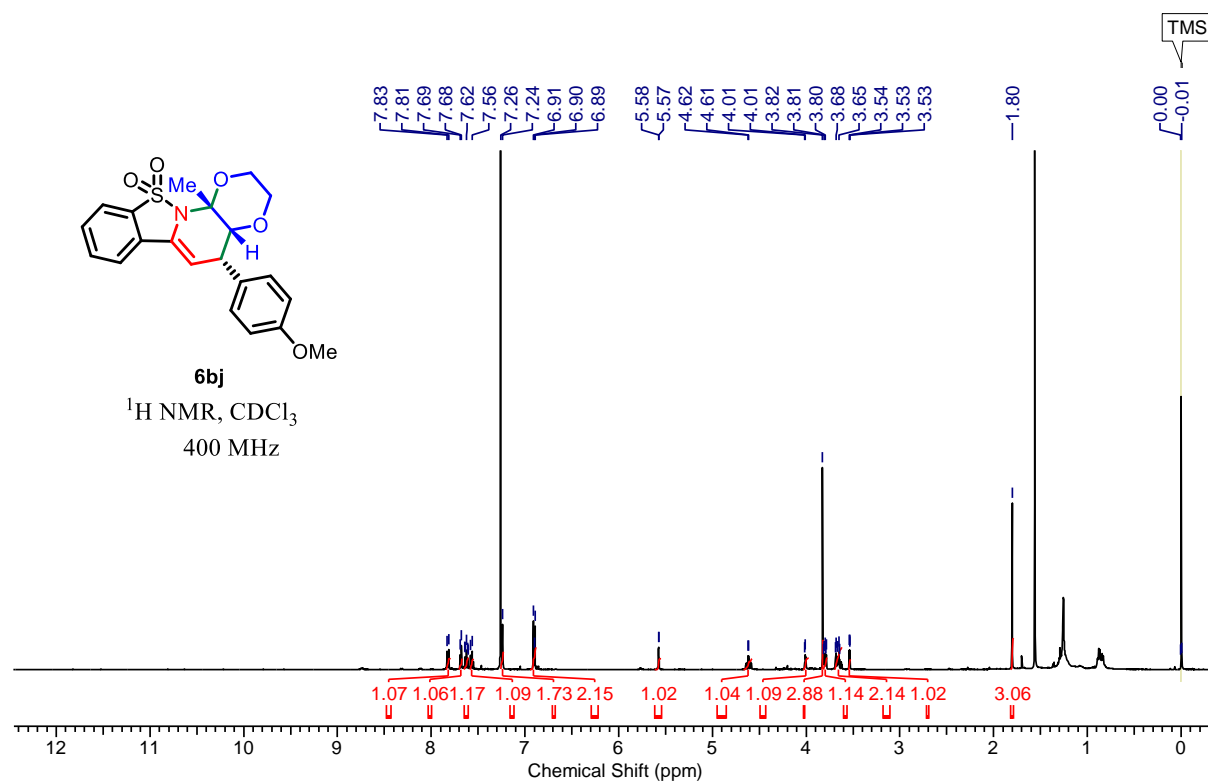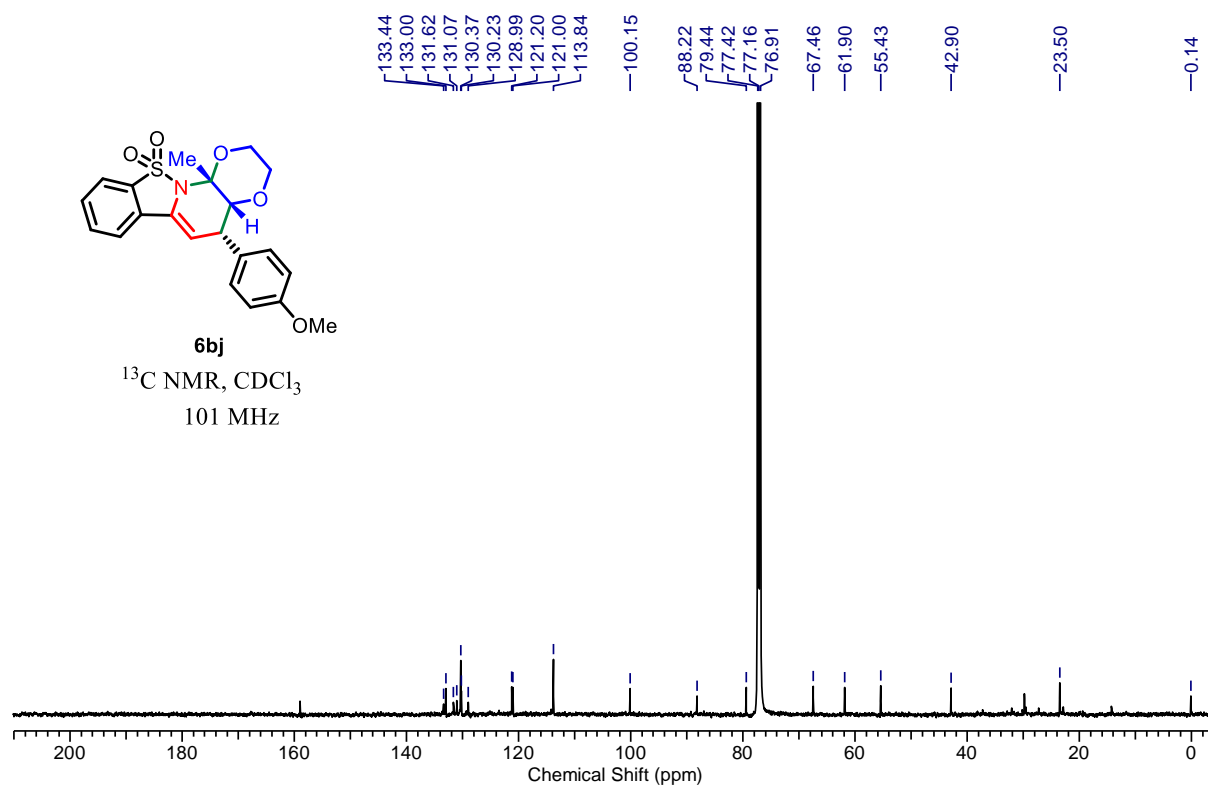

**3,3,12a-Trimethyl-5-(p-tolyl)-3,4,4a,12a-tetrahydro-2H,5H-benzo[4,5]isothiazolo[2,3-a]pyrano[3,2-e]pyridine 11,11-dioxide (6cf):**

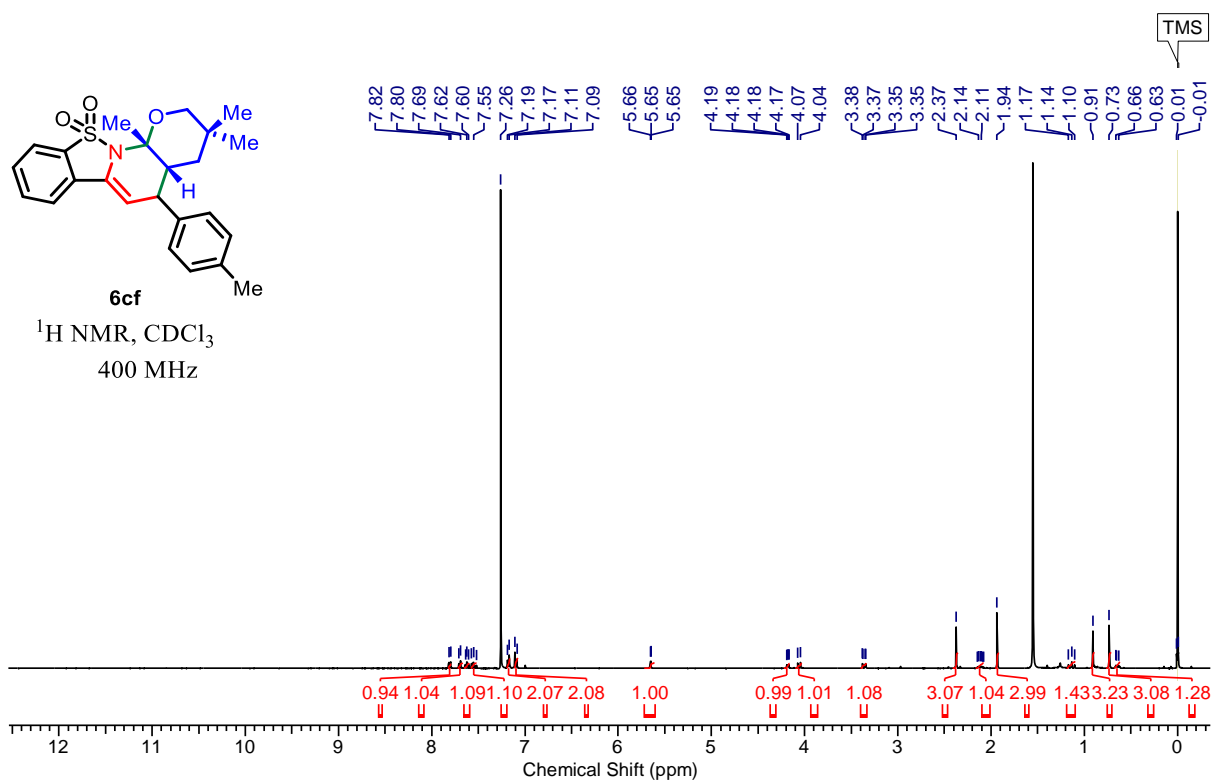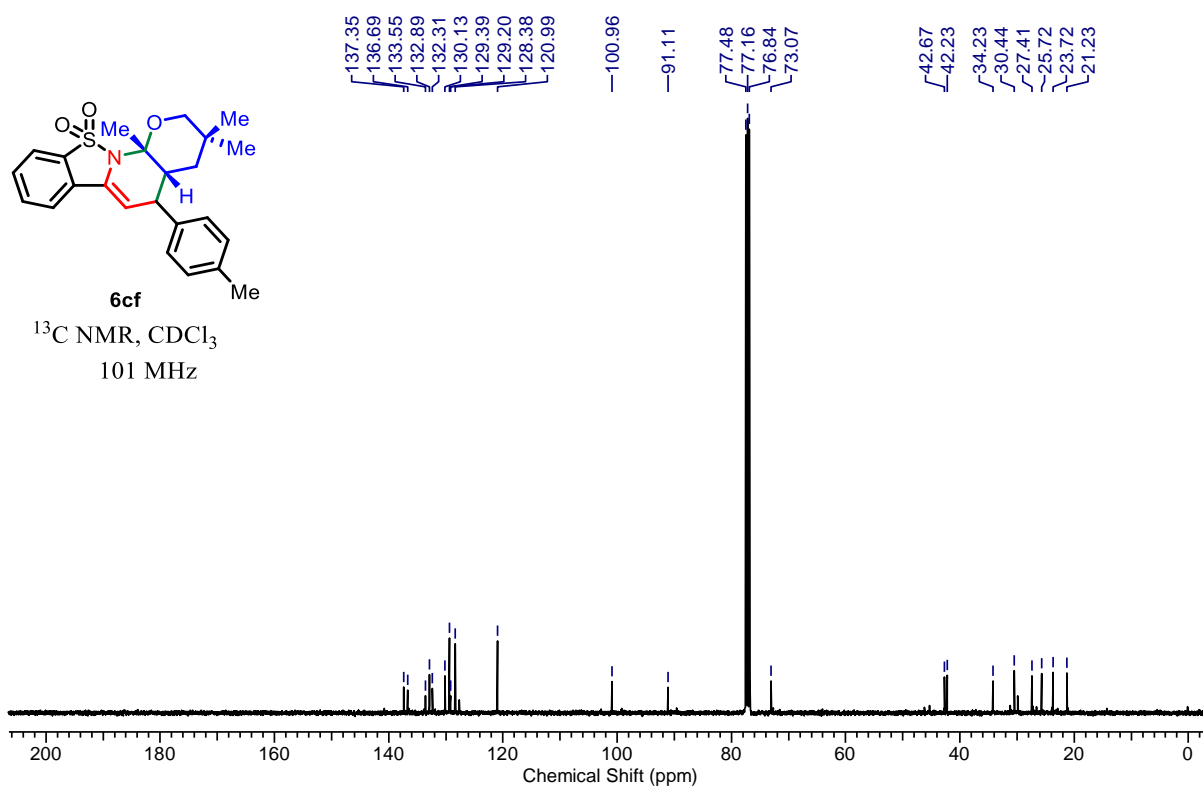



**5-(2-Methoxyphenyl)-2,12a-dimethyl-3,4,4a,12a-tetrahydro-2H,5H-benzo[4,5]isothiazolo[2,3-a]pyrano[3,2-e]pyridine 11,11-dioxide (6di):**

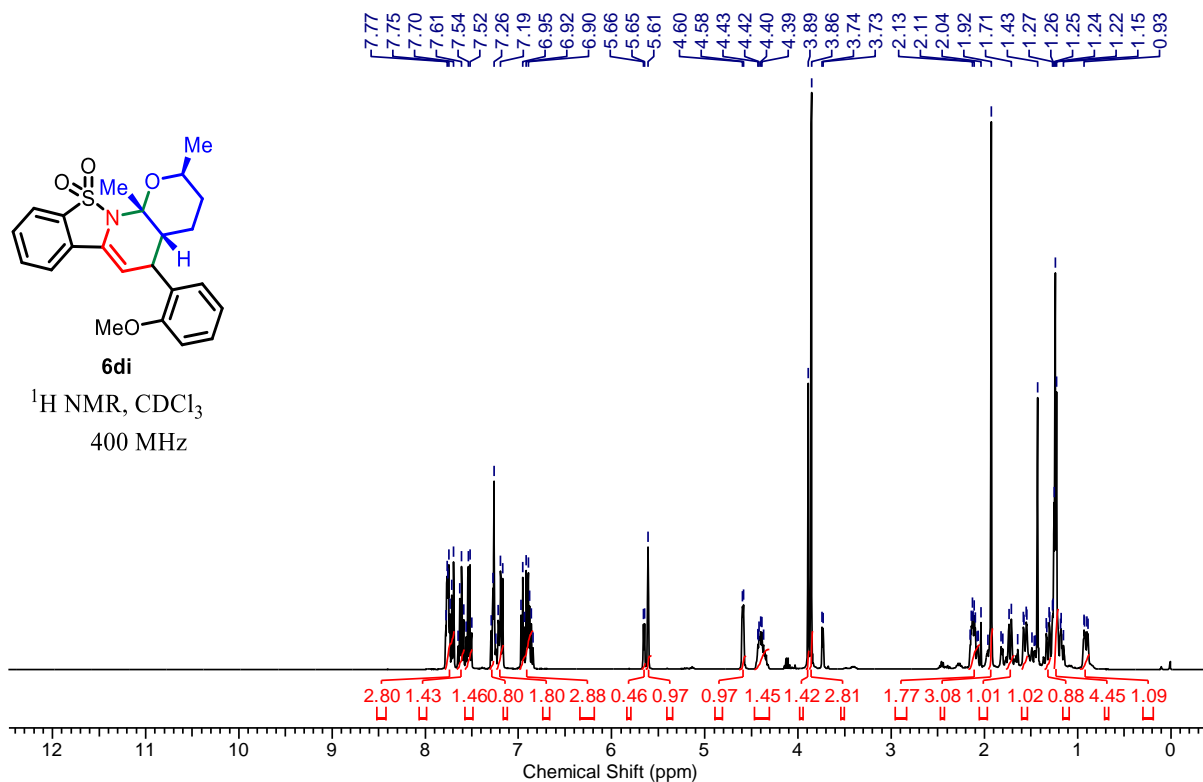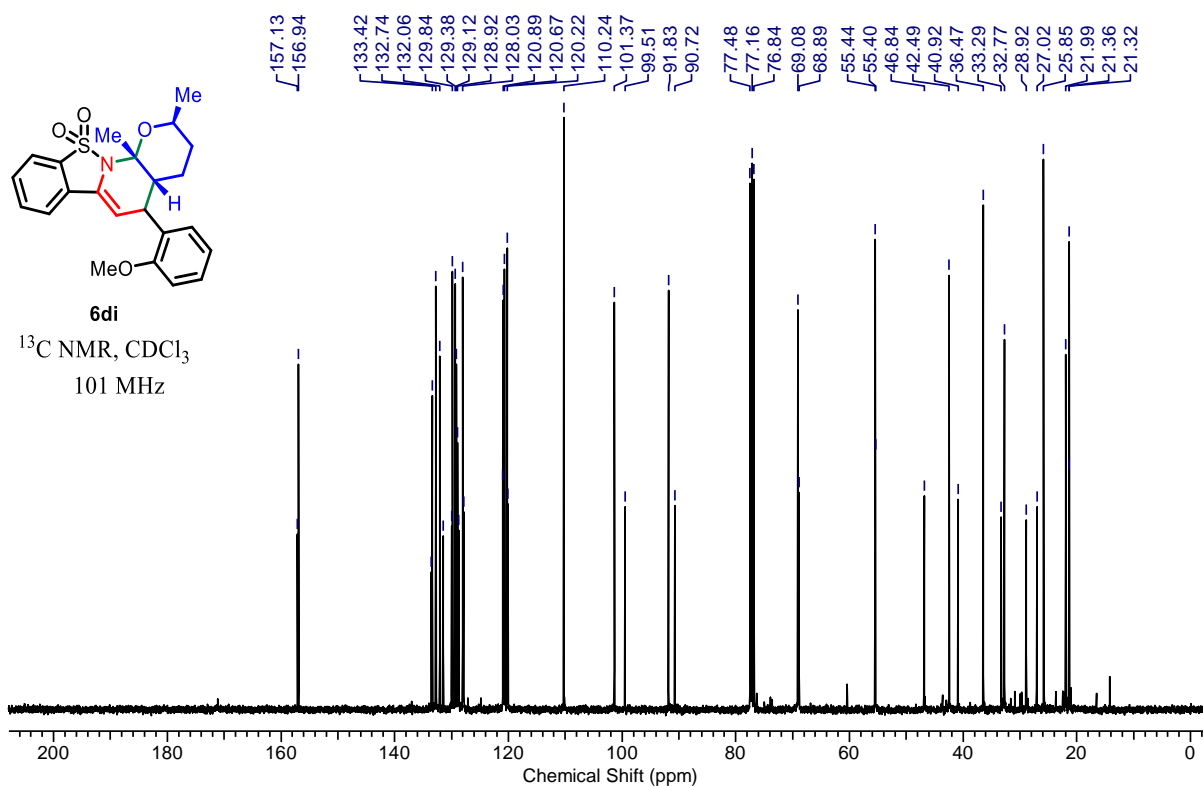

**5-(2-Methoxyphenyl)-2,12a-dimethyl-3,4,4a,12a-tetrahydro-2H,5H-benzo[4,5]isothiazolo[2,3-a]pyrano[3,2-e]pyridine 11,11-dioxide (6dj):**

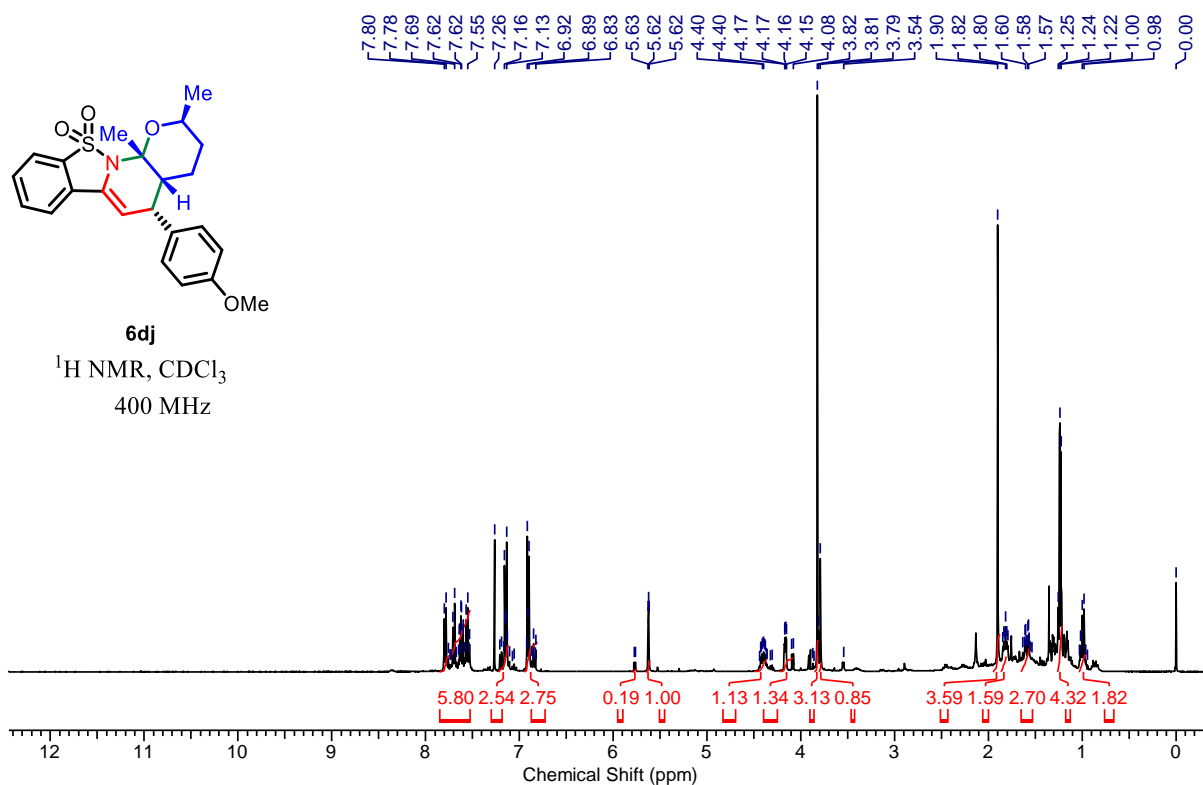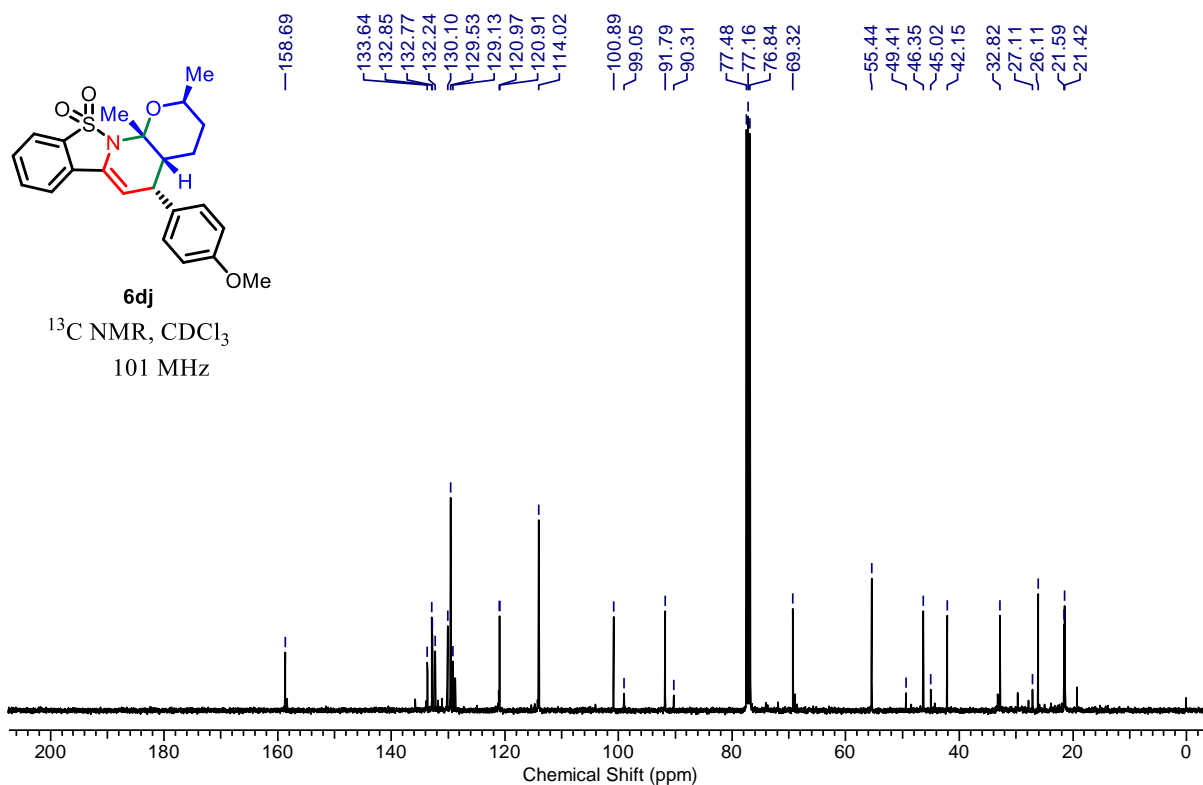

**5-(4-Methoxyphenyl)-2,12a-dimethyl-2,3,4a,12a-tetrahydro-5H-benzo[4,5]isothiazolo[2,3-a][1,4]dioxino[2,3-e]pyridine 11,11-dioxide and 5-(4-methoxyphenyl)-3,12a-dimethyl-2,3,4a,12a-tetrahydro-5H-benzo[4,5]isothiazolo[2,3-a][1,4]dioxino[2,3-e]pyridine 11,11-dioxide (6ej & 6ej')**

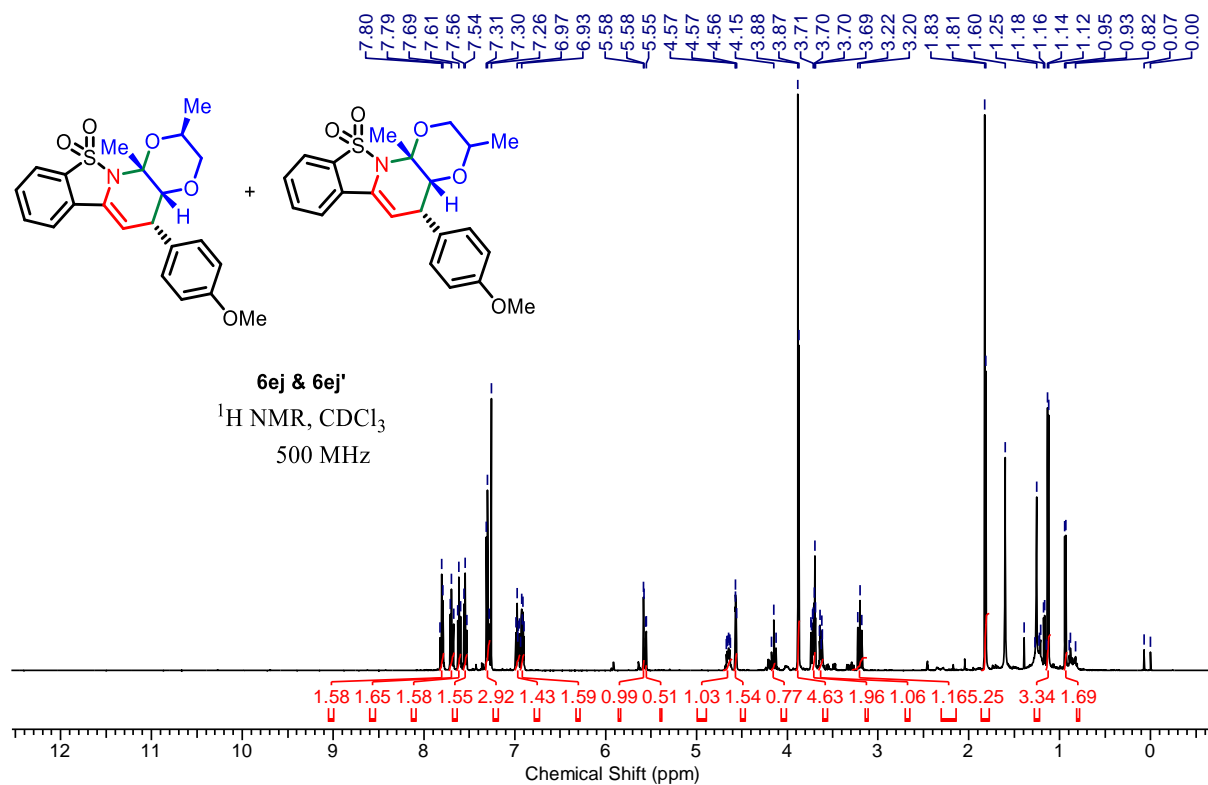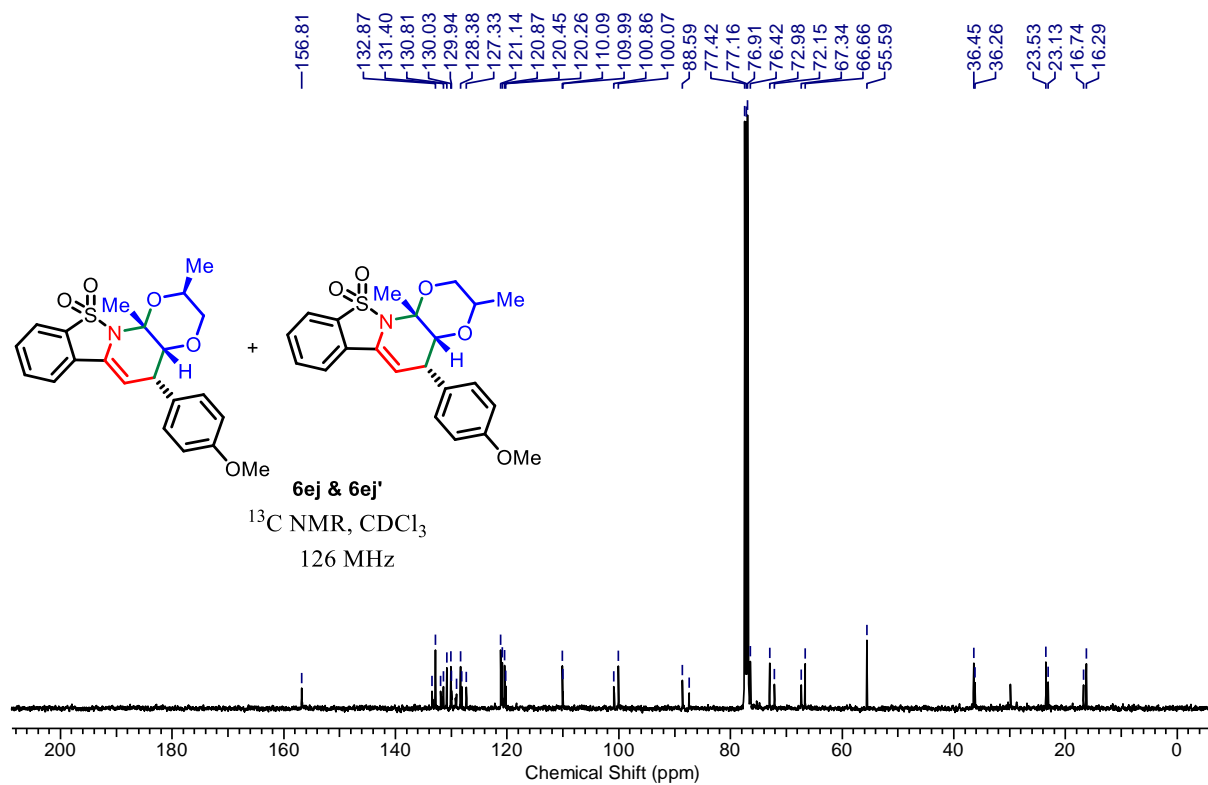

5-(4-Methoxyphenyl)-12a-methyl-1,3a,4,4a,12a,13a-hexahydro-2H,5H-

benzo[4,5]isothiazolo[2,3-a]furo[2',3':5,6]pyrano[3,2-e]pyridin-2-one 11,11-dioxide (6fj):

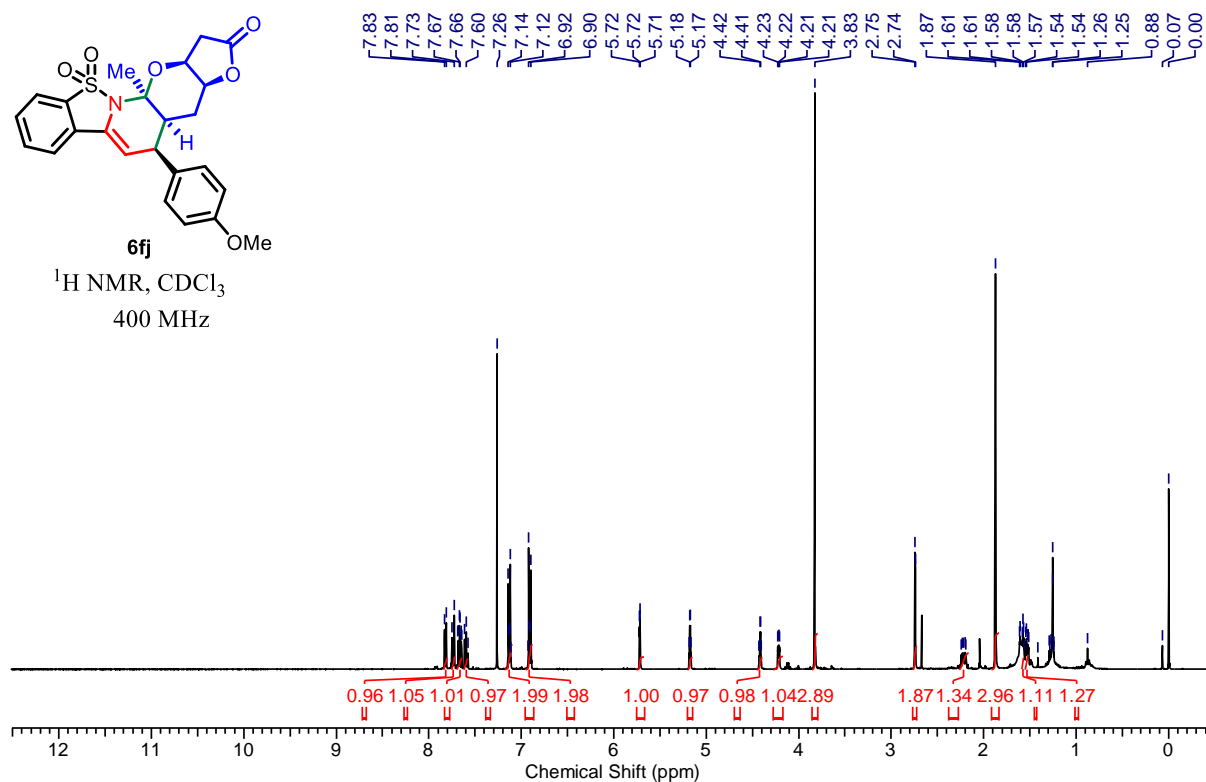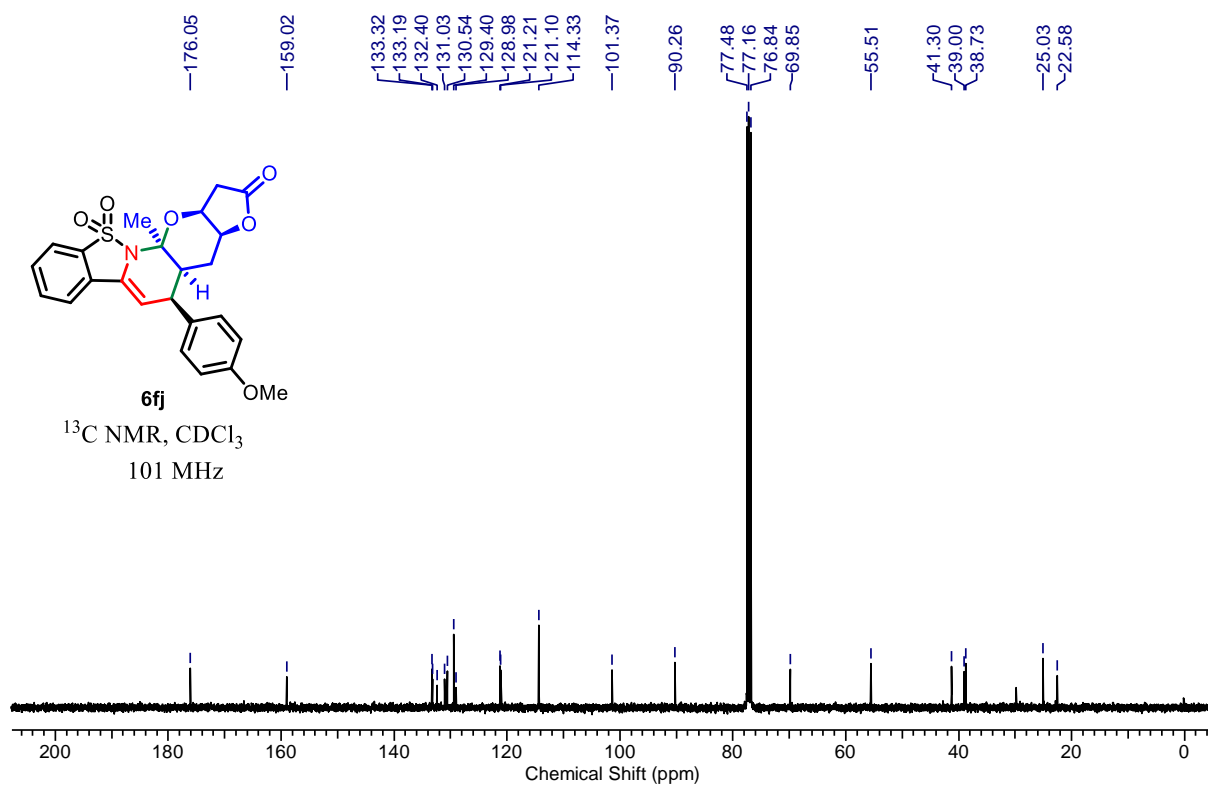

**1a-Methyl-4-phenyl-2,3,3a,11a-tetrahydro-4H-benzo[4,5]isothiazolo[2,3-a]furo[3,2-e]pyridine 10,10-dioxide (7aa)**

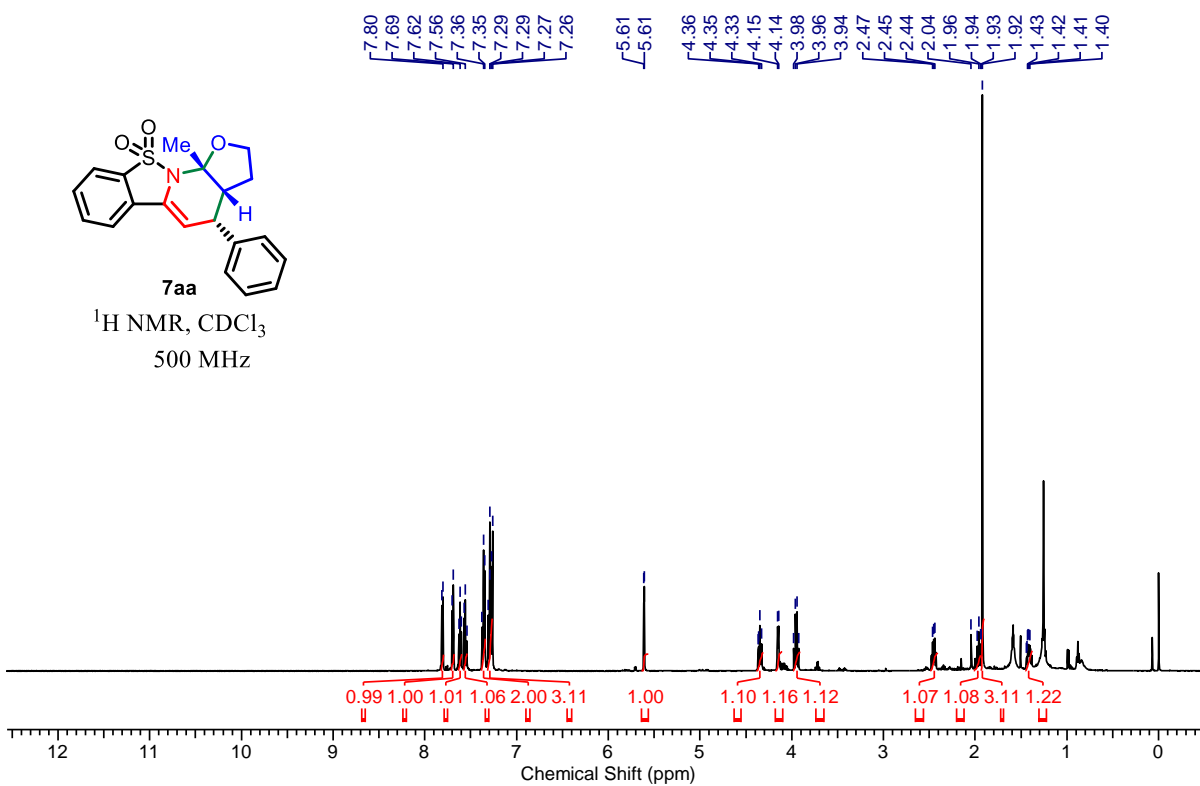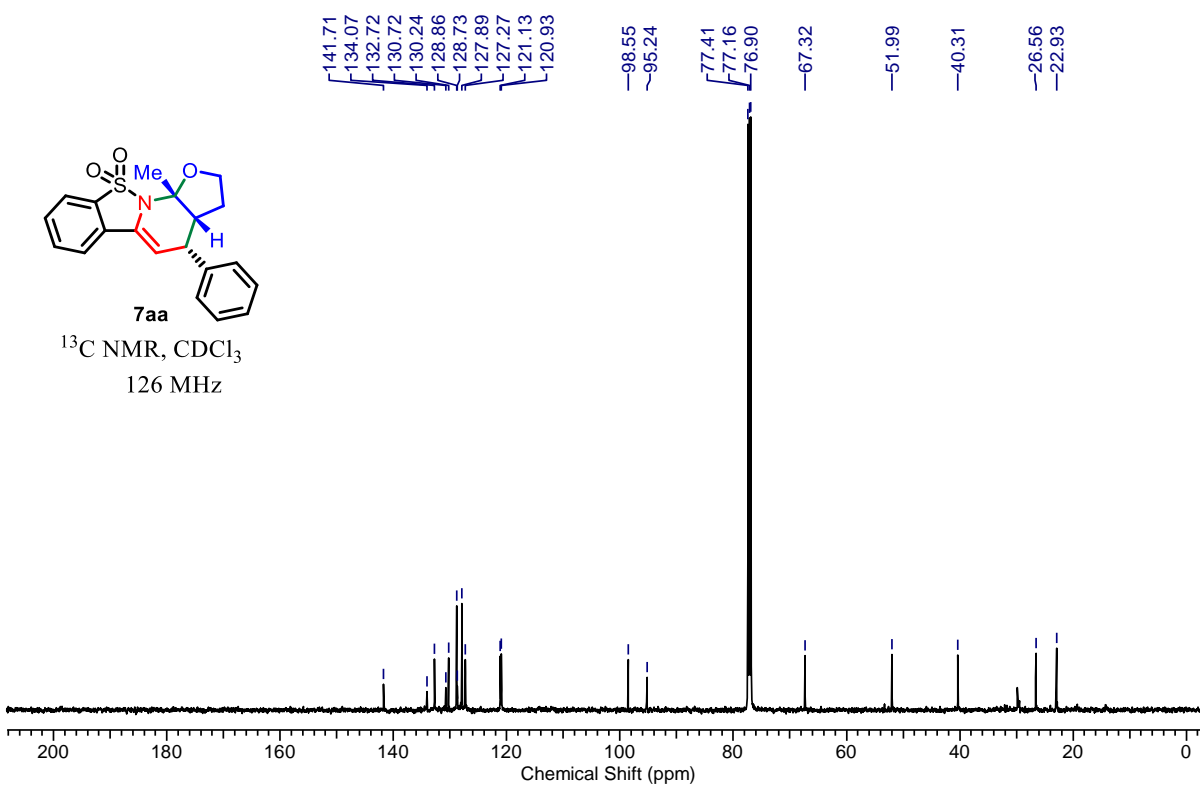

**11a-Methyl-4-(naphthalen-2-yl)-2,3,3a,11a-tetrahydro-4H-benzo[4,5]isothiazolo[2,3-a]furo[3,2-e]pyridine 10,10-dioxide (7ac)**

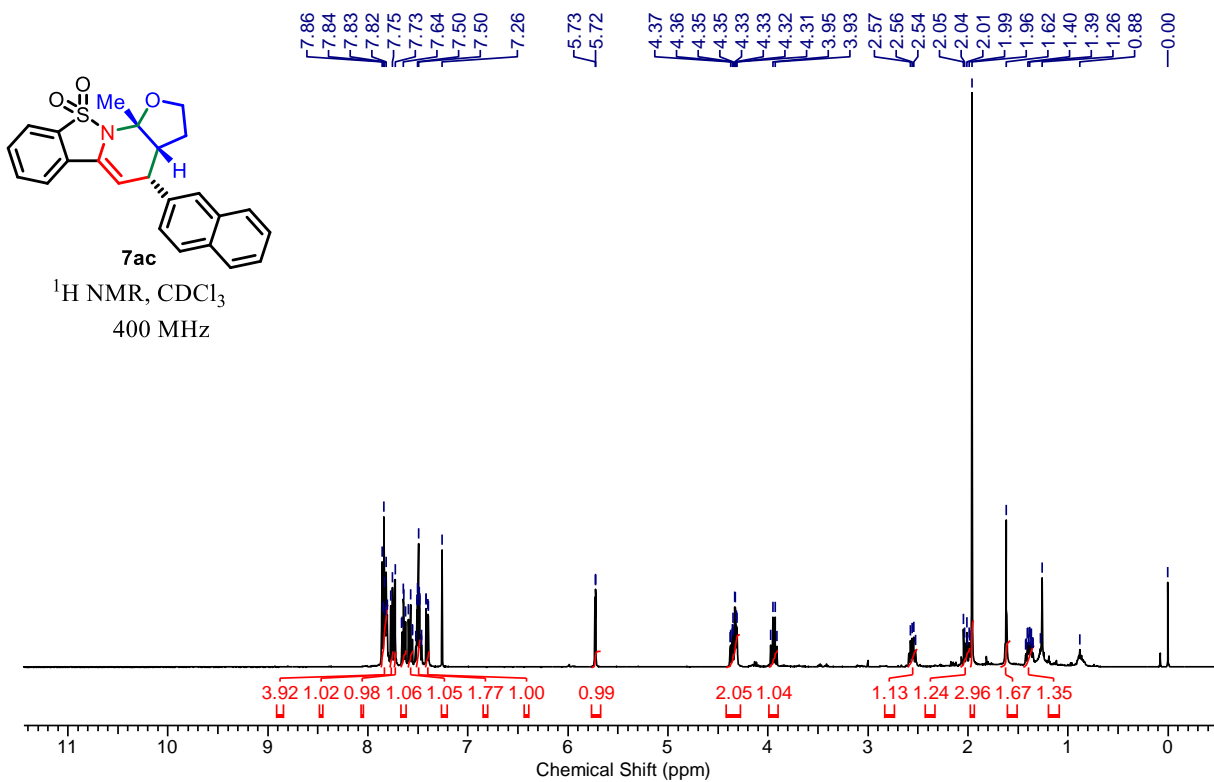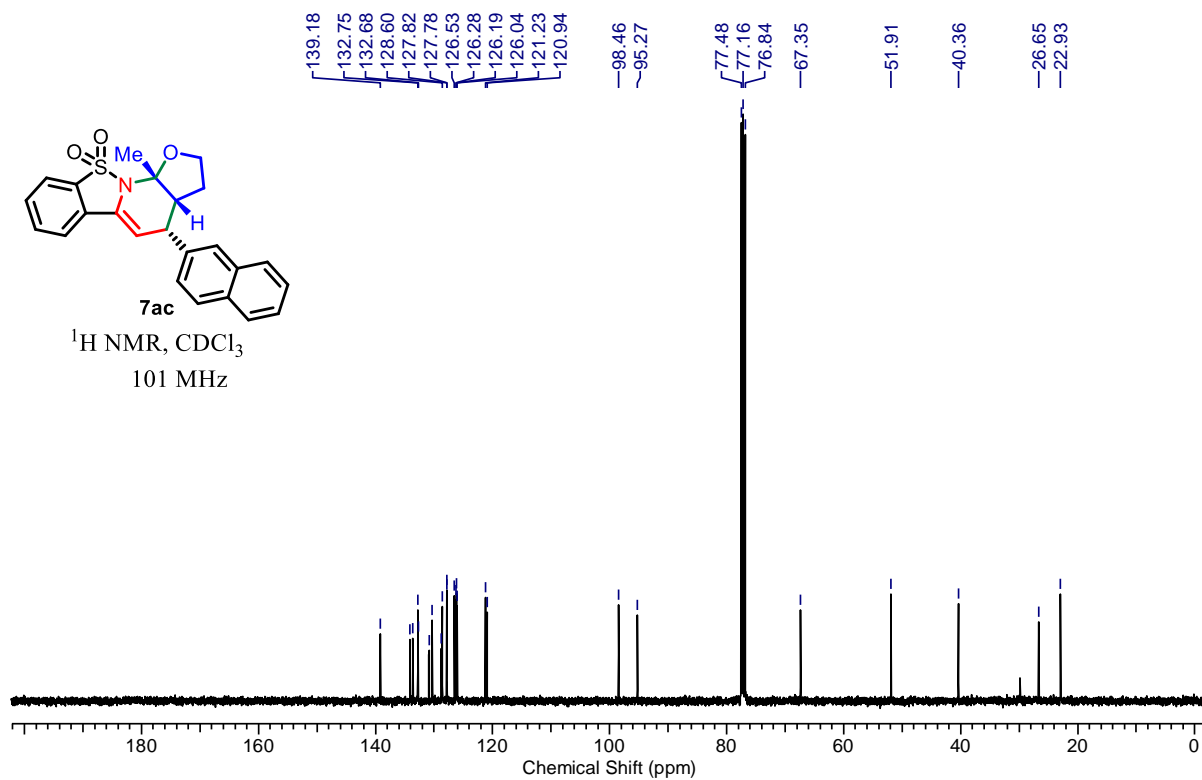

4-([1,1'-Biphenyl]-4-yl)-11a-methyl-2,3,3a,11a-tetrahydro-4H-benzo[4,5]isothiazolo[2,3-a]furo[3,2-e]pyridine 10,10-dioxide (7ae)

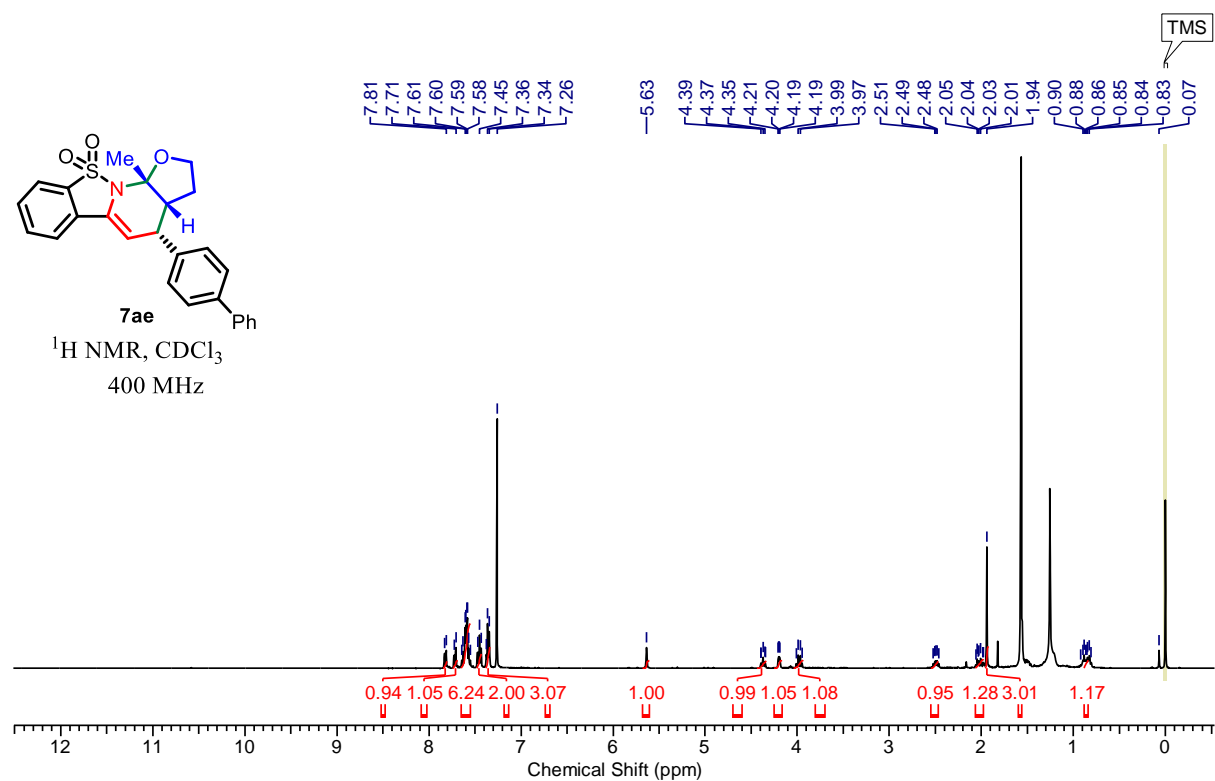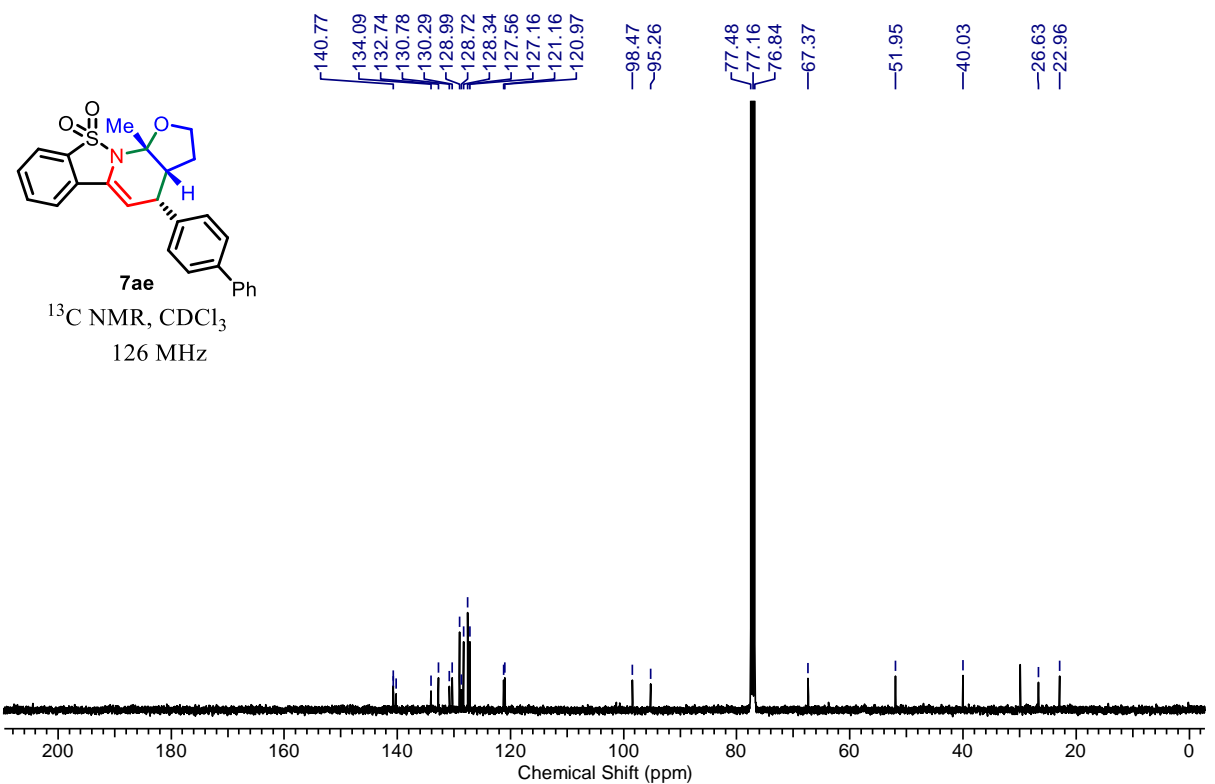



**4-(2-Methoxyphenyl)-11a-methyl-2,3,3a,11a-tetrahydro-4H-benzo[4,5]isothiazolo[2,3-a]furo[3,2-e]pyridine 10,10-dioxide (7ai)**

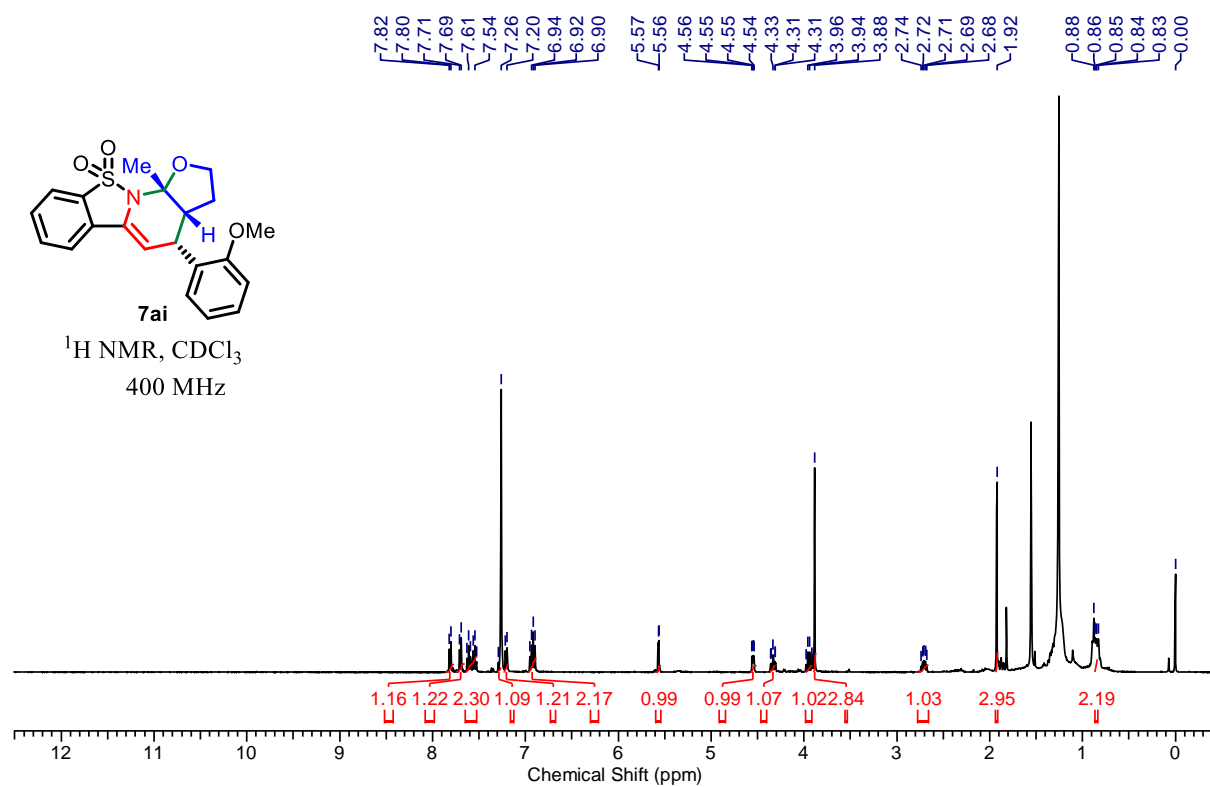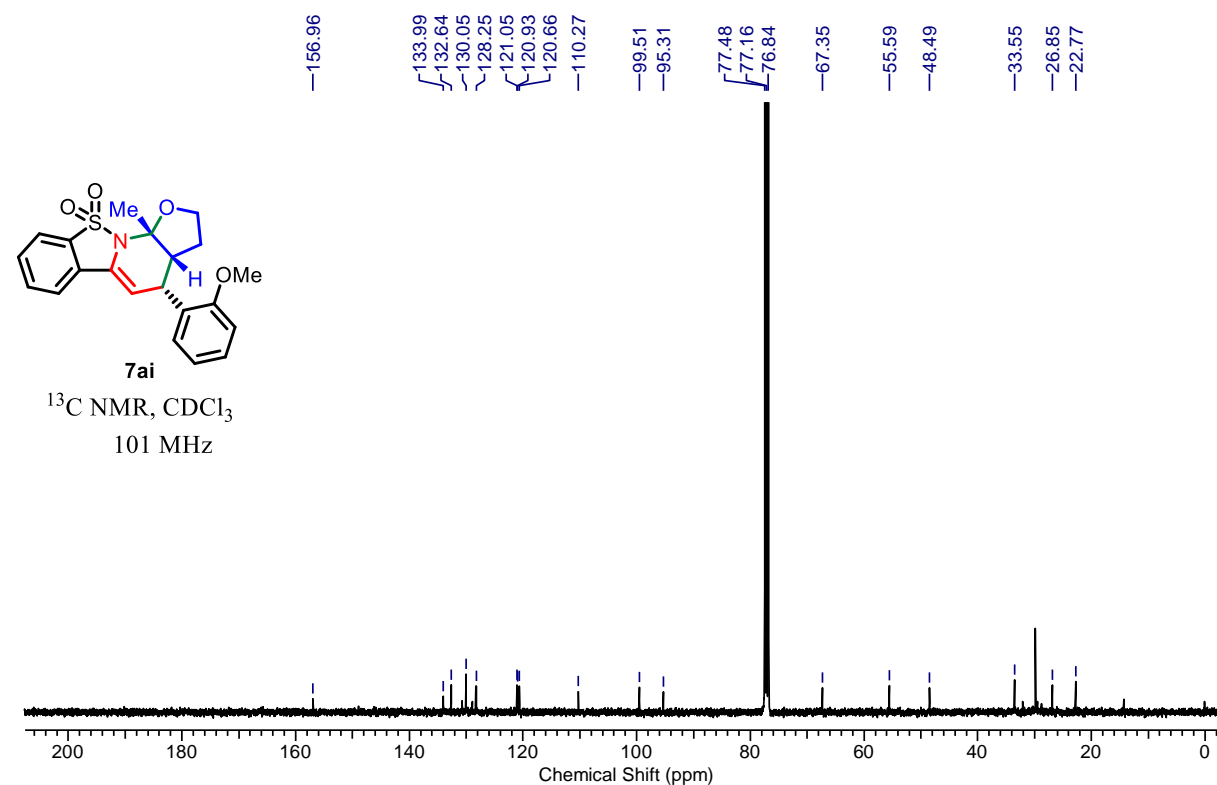

**4-(2-Methoxyphenyl)-11a-methyl-2,3,3a,11a-tetrahydro-4H-benzo[4,5]isothiazolo[2,3-a]furo[3,2-e]pyridine 10,10-dioxide (7ai)**

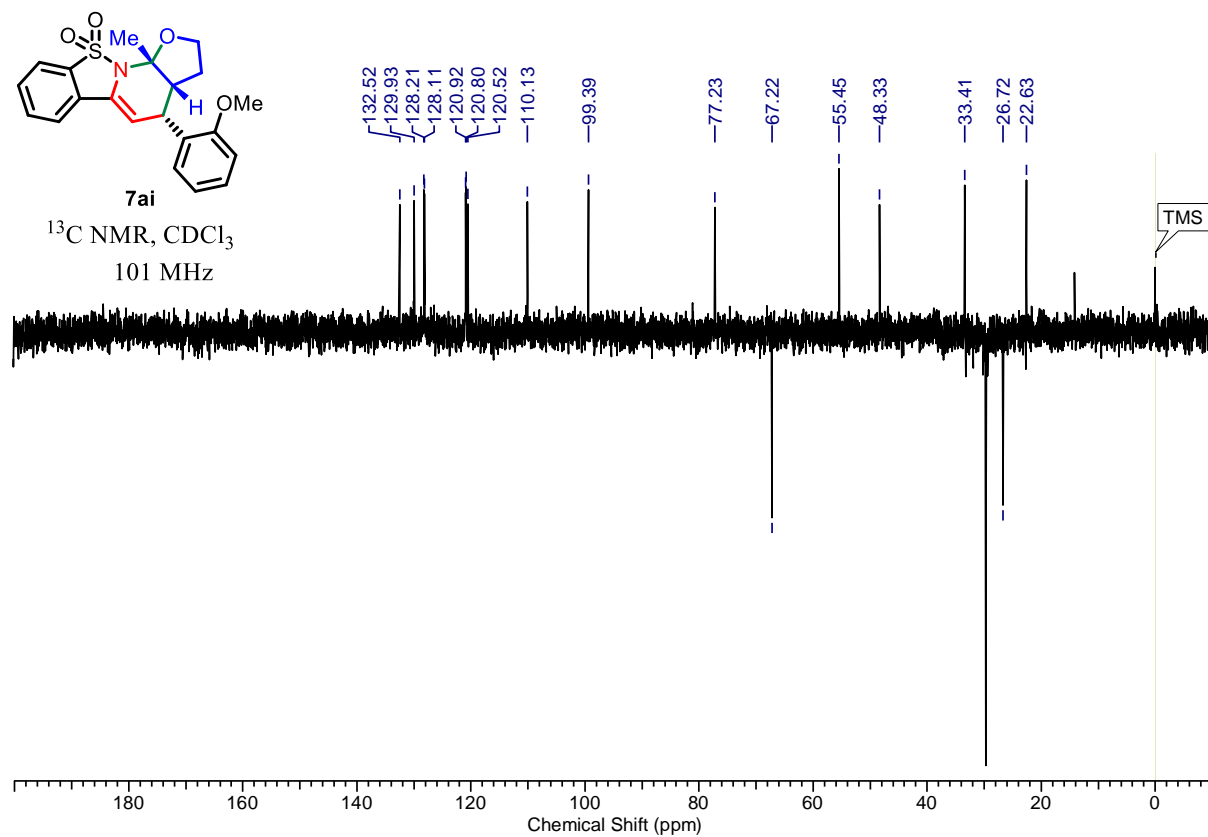

**NOESY zoomed**

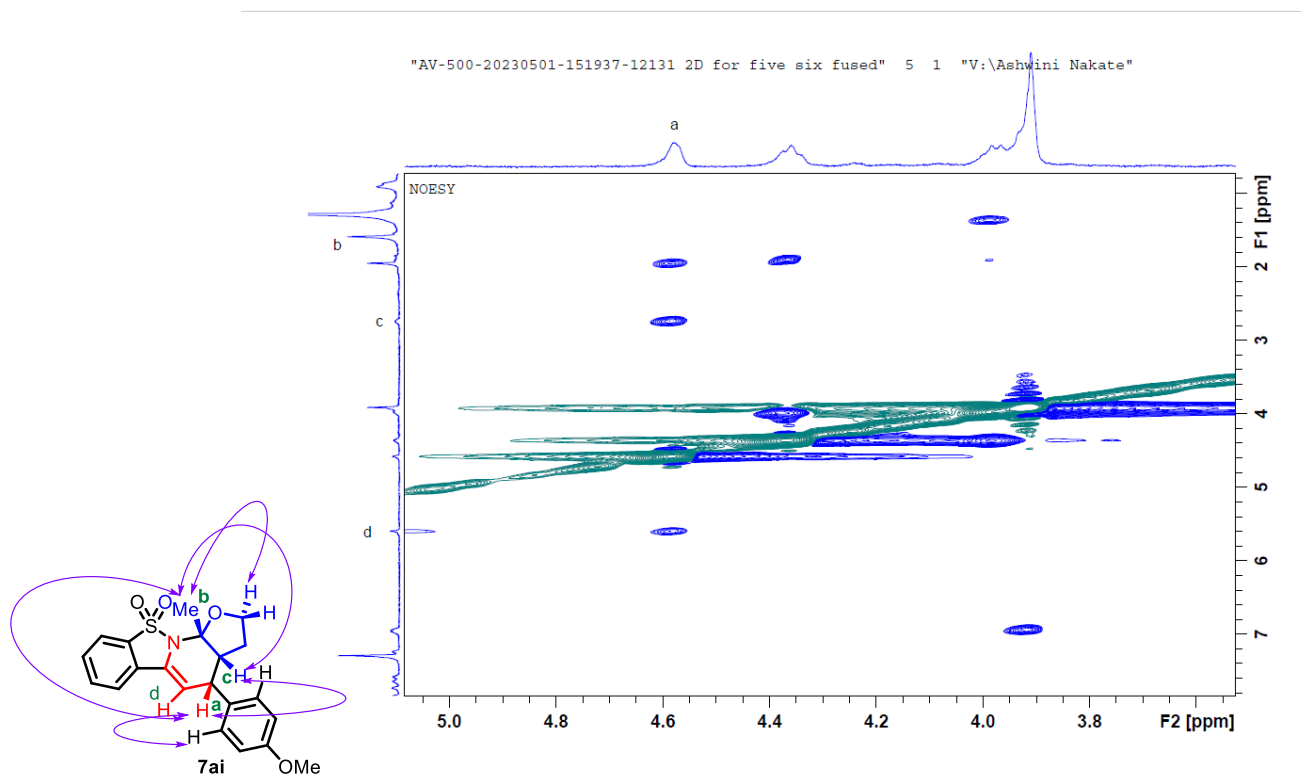

### 7ai: NOESY

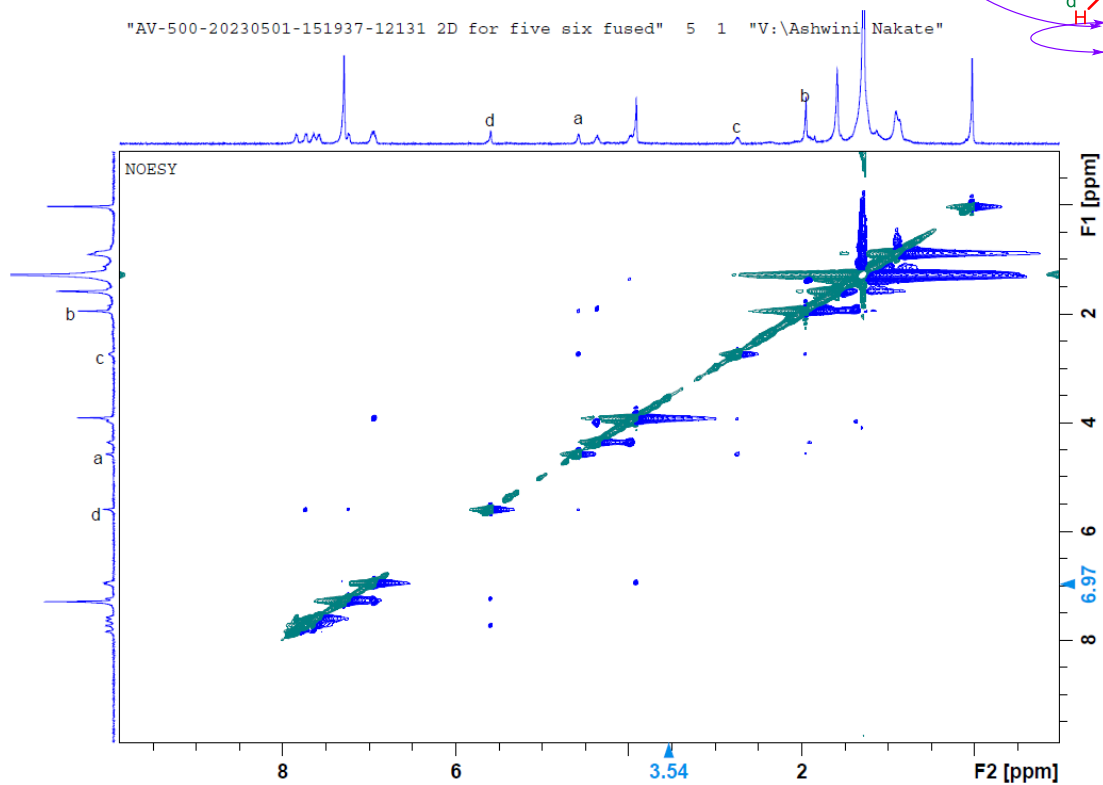

### 7ai: COSY

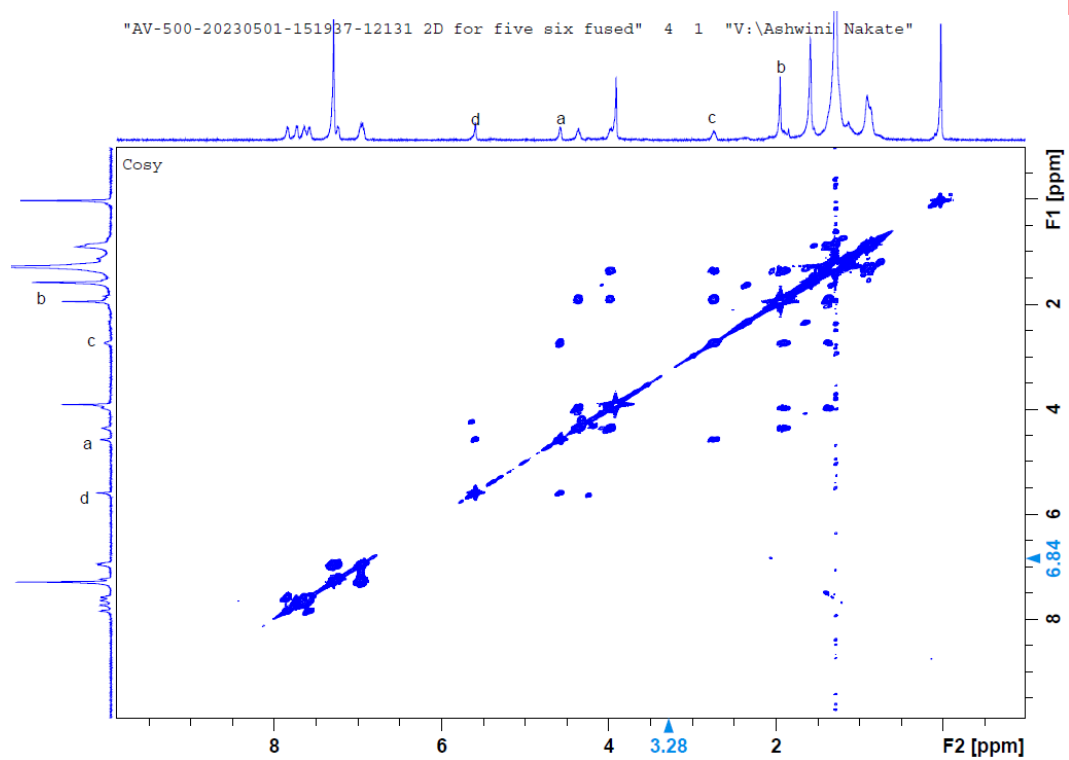

7ai:HMBC

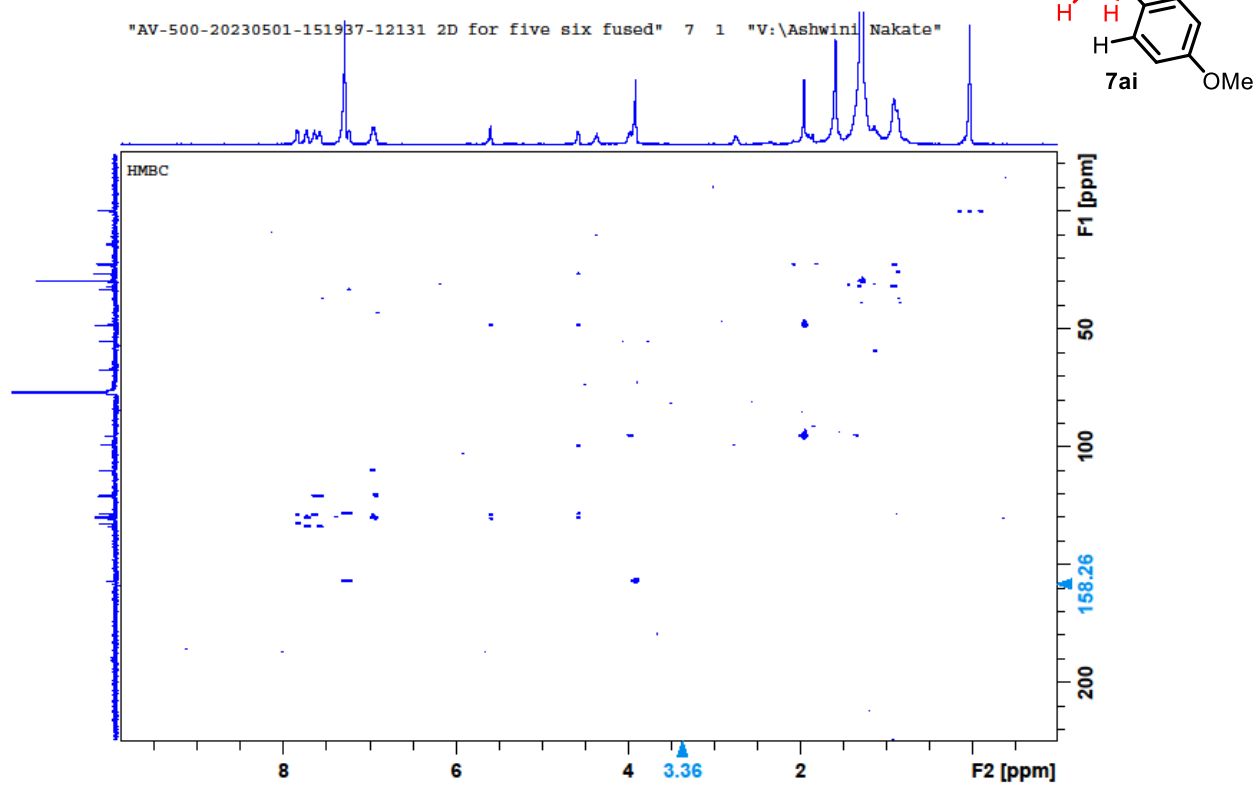

7ai: HSQC

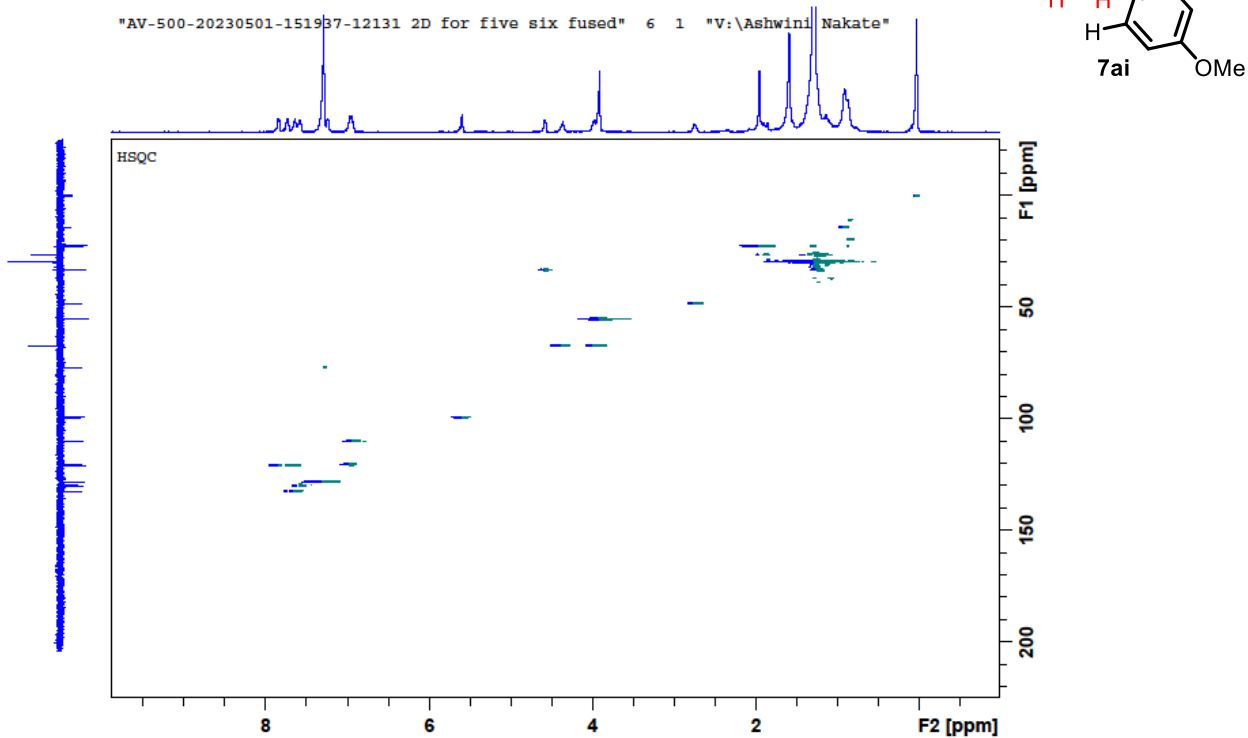

**4-(4-Methoxyphenyl)-2,11a-dimethyl-2,3,3a,11a-tetrahydro-4H-benzo[4,5]isothiazolo[2,3-a]furo[3,2-e]pyridine 10,10-dioxide (7bj):**

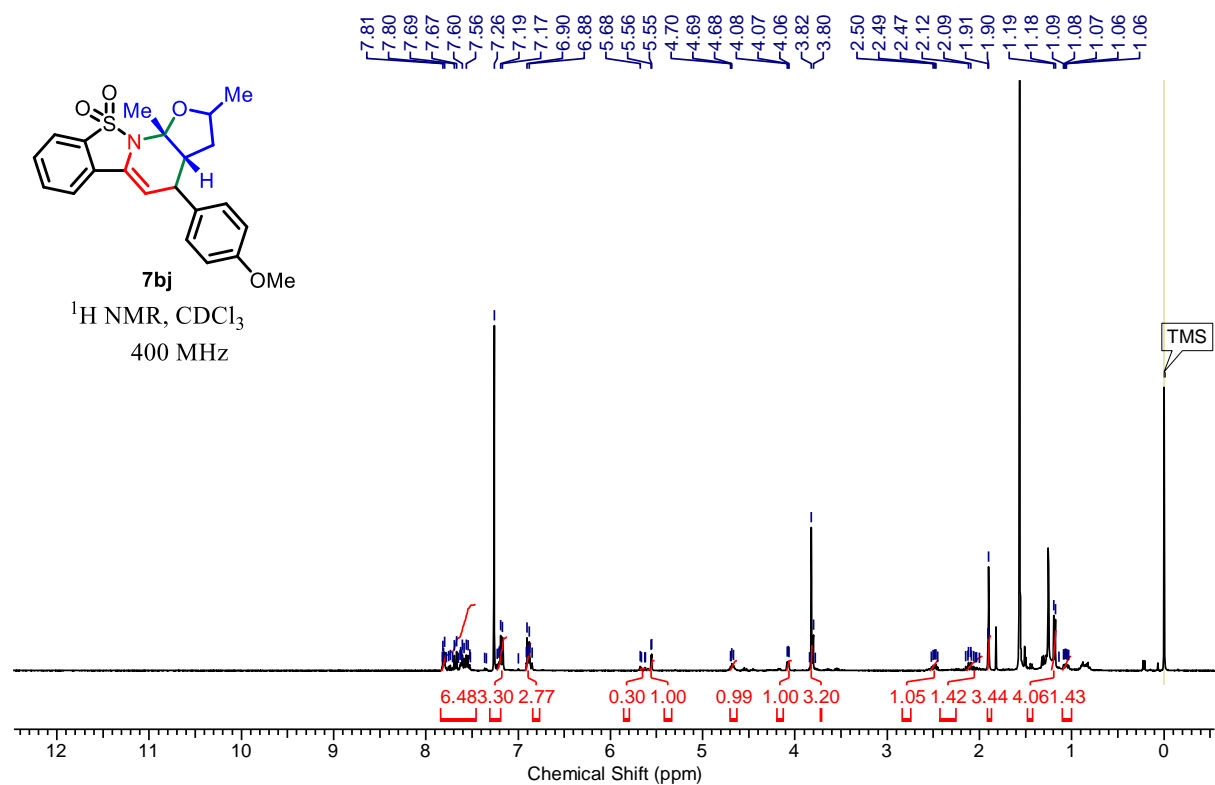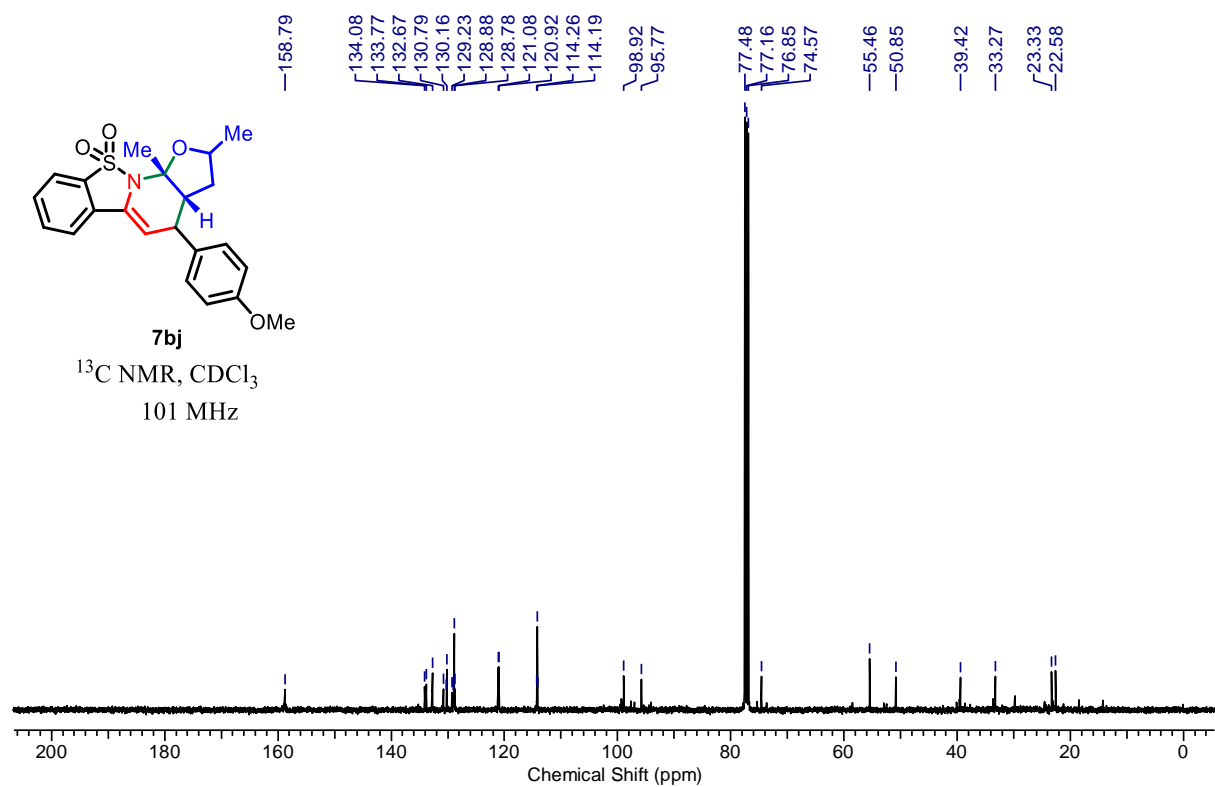

**4-(4-Methoxyphenyl)-2,2,11a-trimethyl-2,3,3a,11a-tetrahydro-4H-benzo[4,5]isothiazolo[2,3-a]furo[3,2-e]pyridine 10,10-dioxide (7cf):**

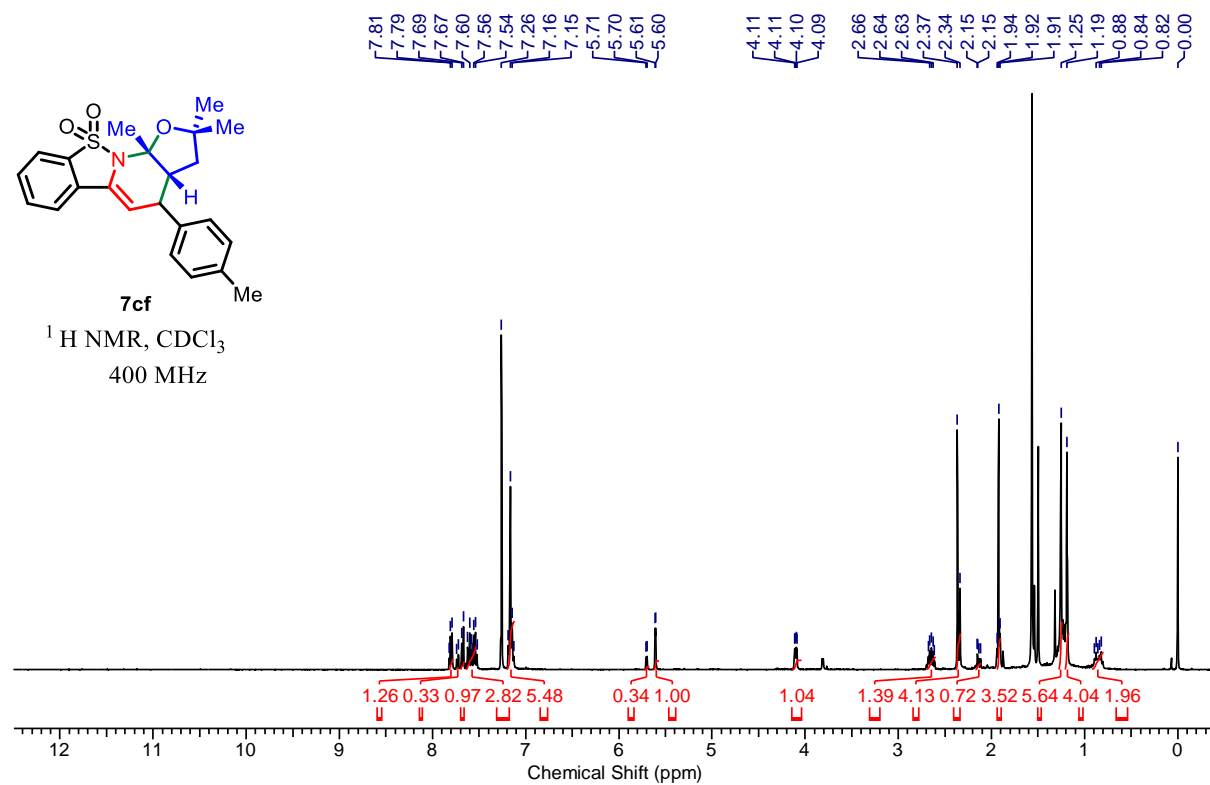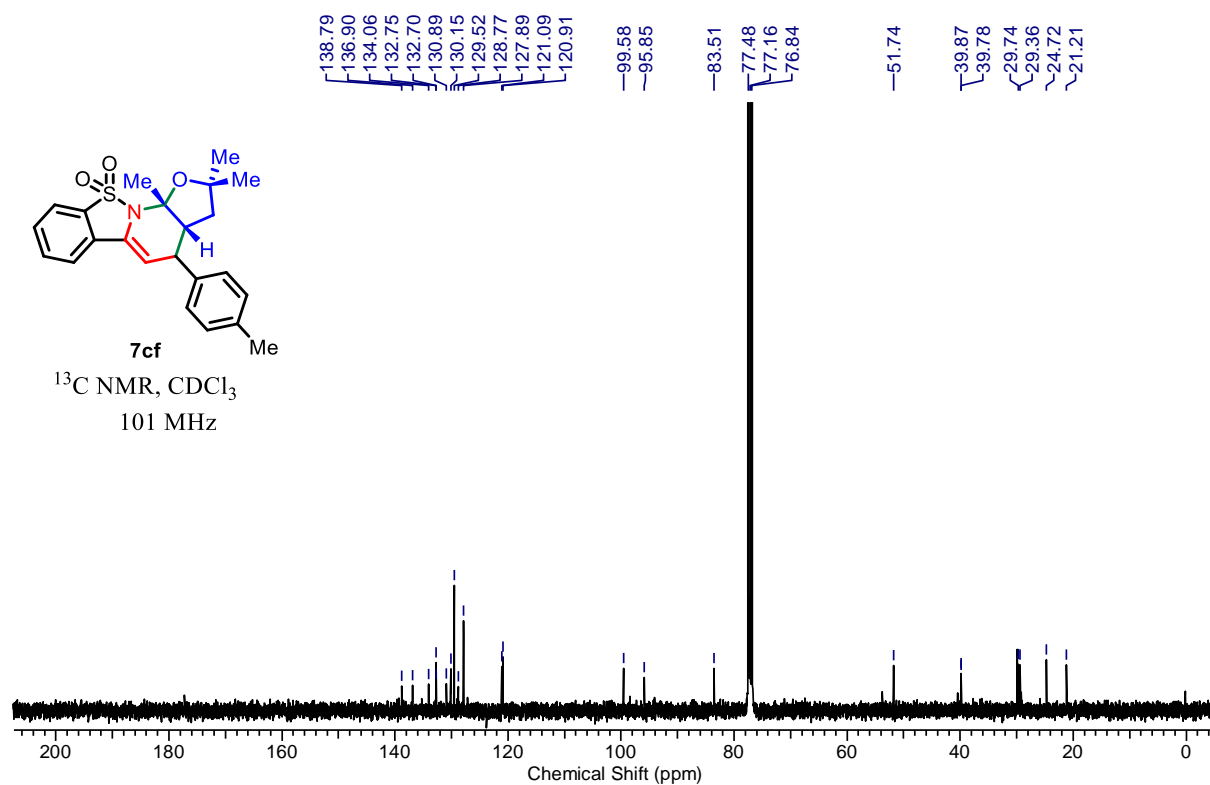

**9-(Naphthalen-2-yl)-8,9-dihydro-3*H*,5'*H*-dispiro[benzo[4,5]isothiazolo[2,3-a]pyridine-7,2'-furan-4',1'-cyclopentane] 5,5-dioxide (8dc)**

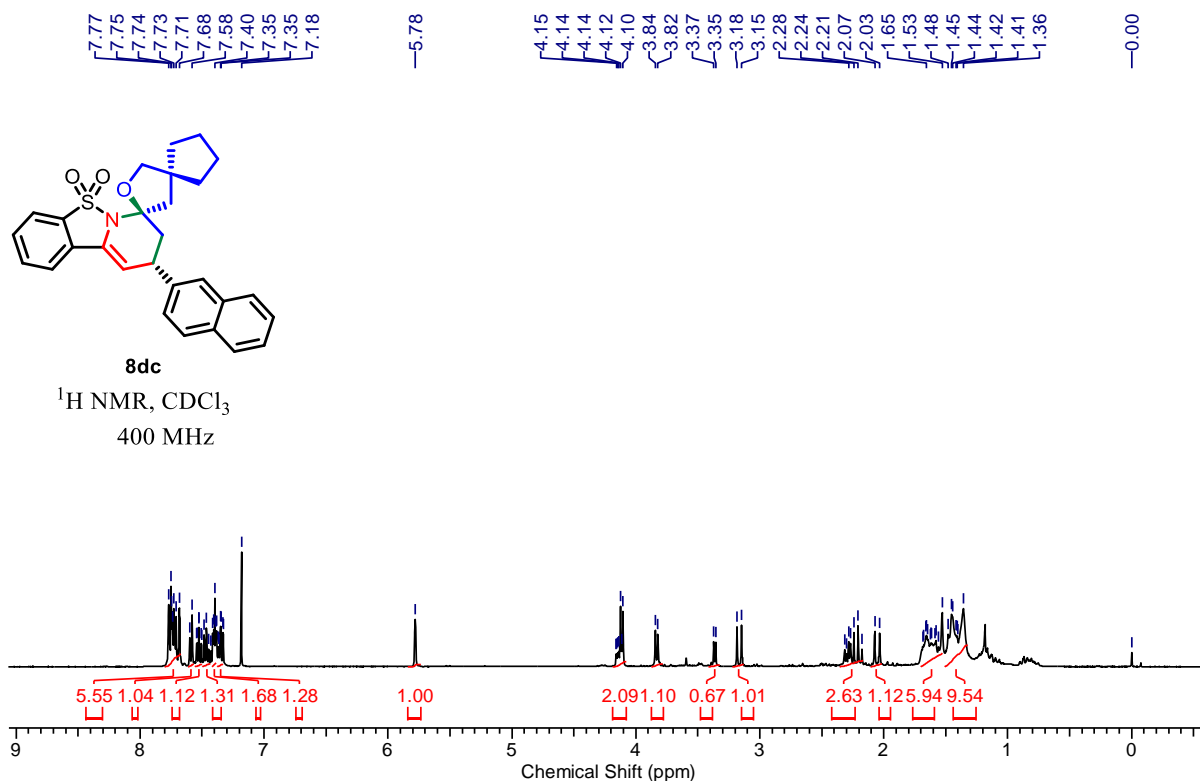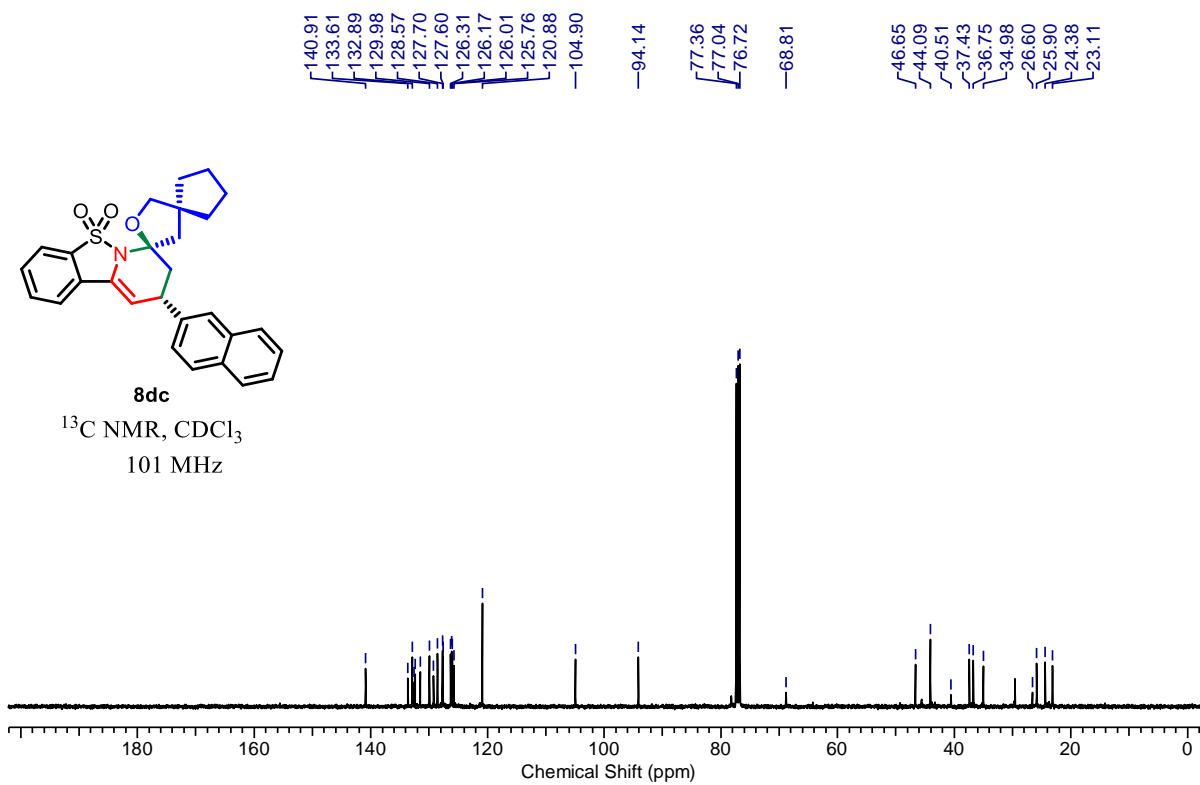



**9-(*p*-Tolyl)-8,9-dihydro-3'*H*,5'*H*-dispiro[benzo[4,5]isothiazolo[2,3-*a*]pyridine-7,2'-furan-4',1'-cyclopentane] 5,5-dioxide (8df):**

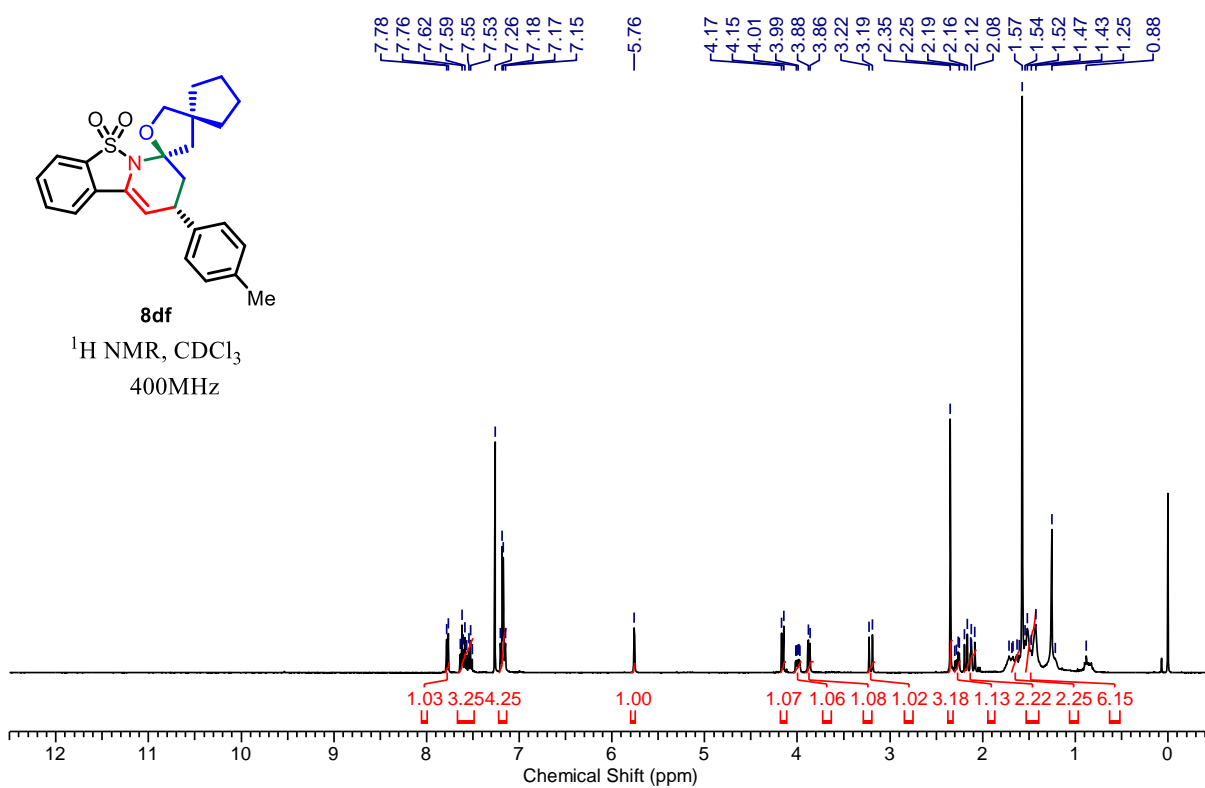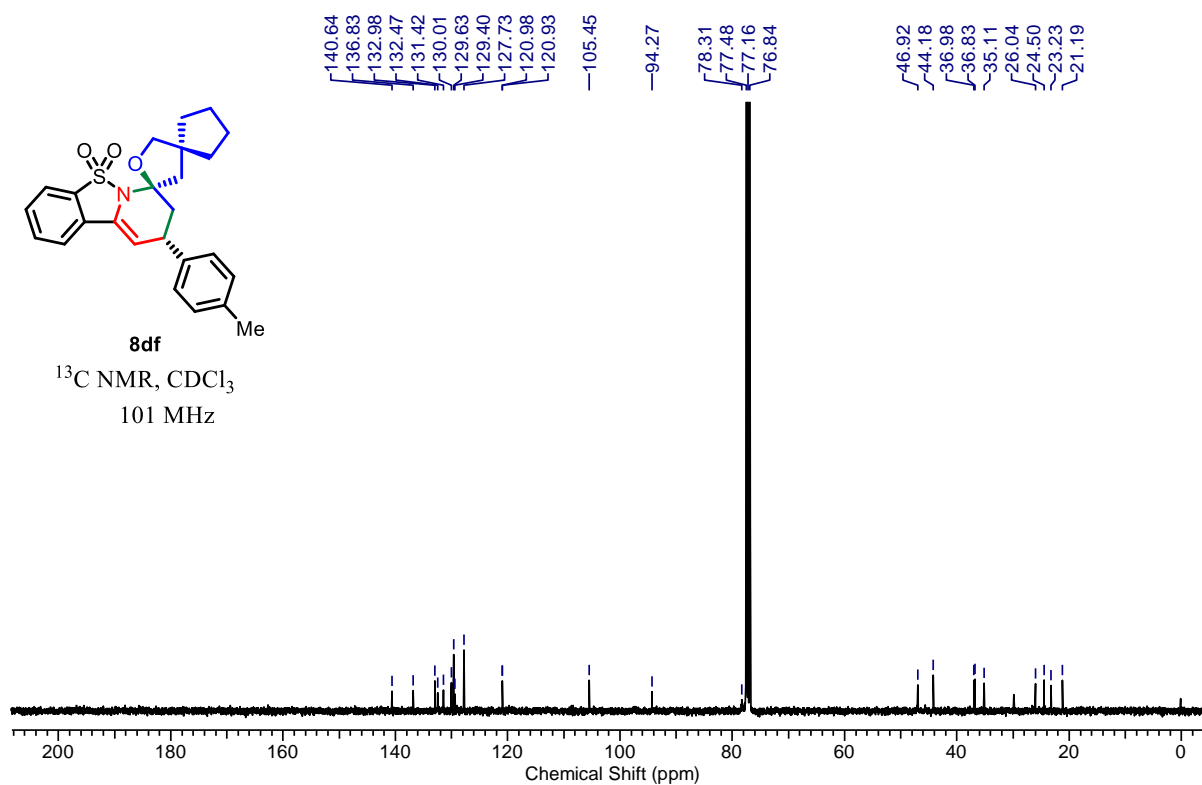

**9-(4-Methoxyphenyl)-8,9-dihydro-3'H,5'H-dispiro[benzo[4,5]isothiazolo[2,3-a]pyridine-7,2'-furan-4',1''-cyclopentane] 5,5-dioxide (8dj):**

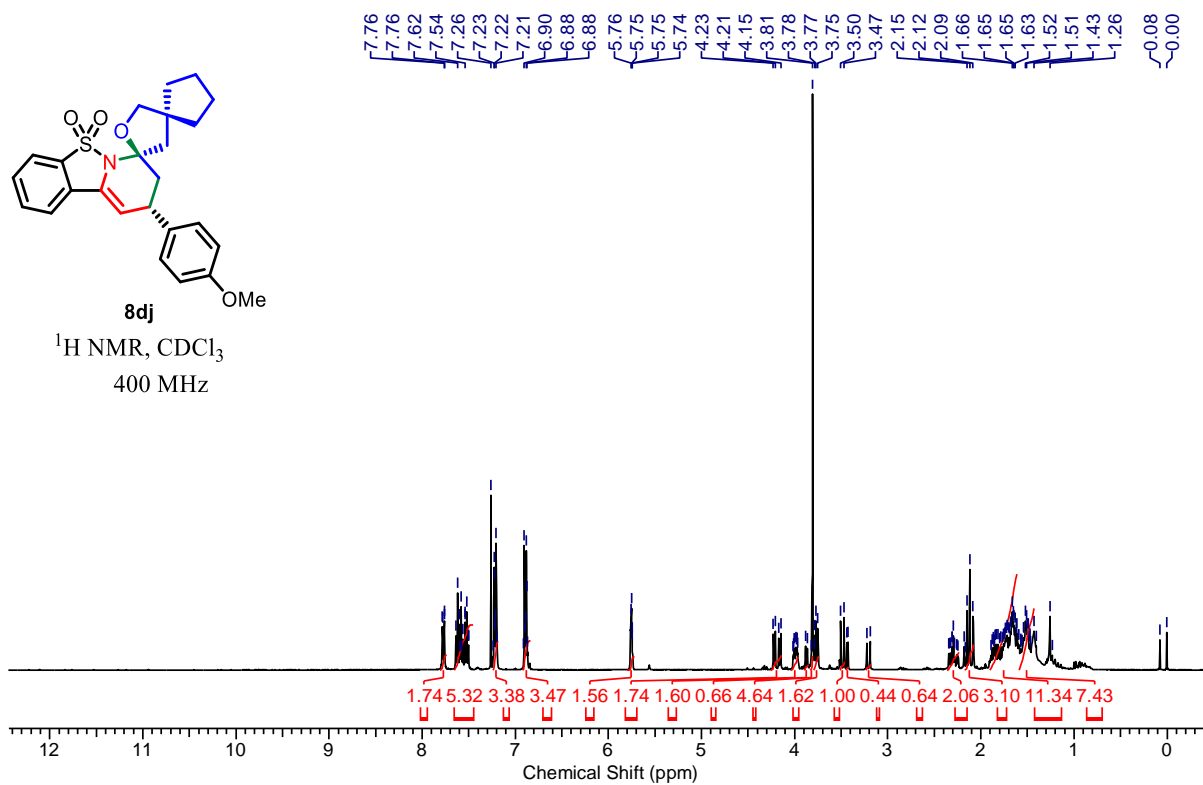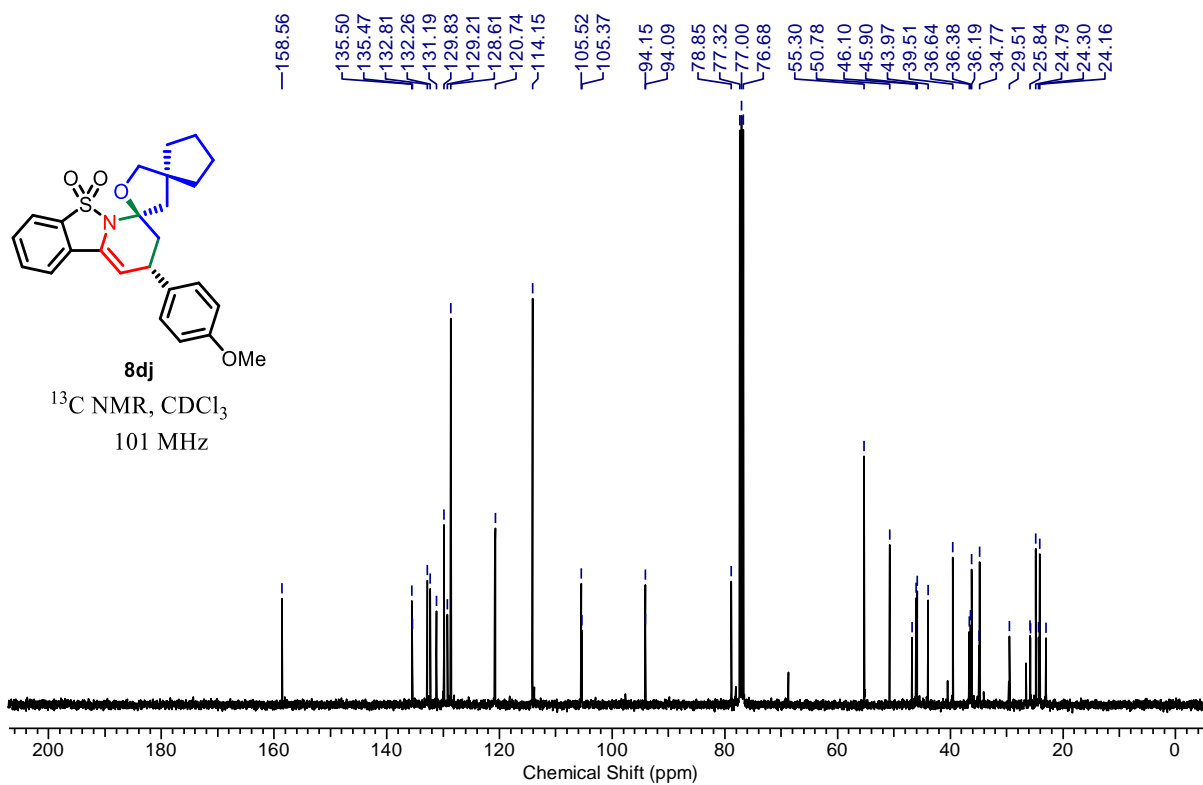

**9-(Naphthalen-2-yl)-8,9-dihydro-3'*H*,5'*H*-dispiro[benzo[4,5]isothiazolo[2,3-*a*]pyridine-7,2'-furan-4',1'-cyclohexane] 5,5-dioxide (8ec):**

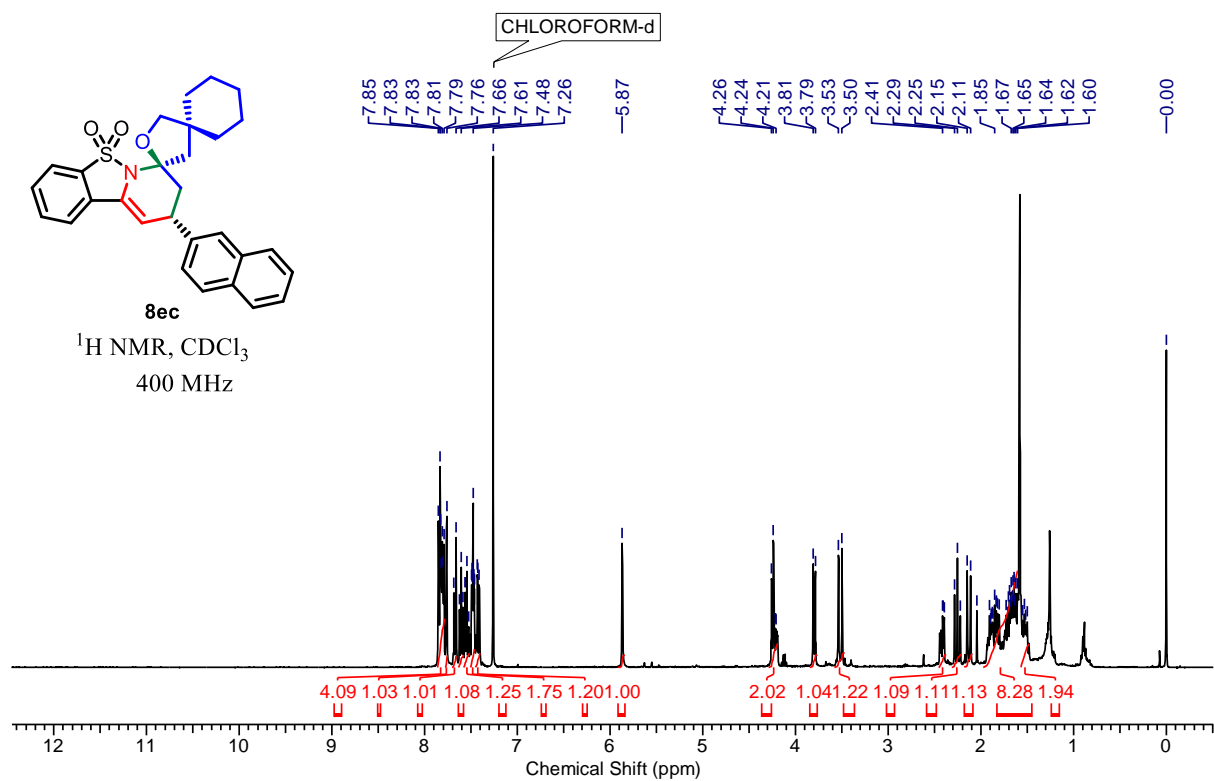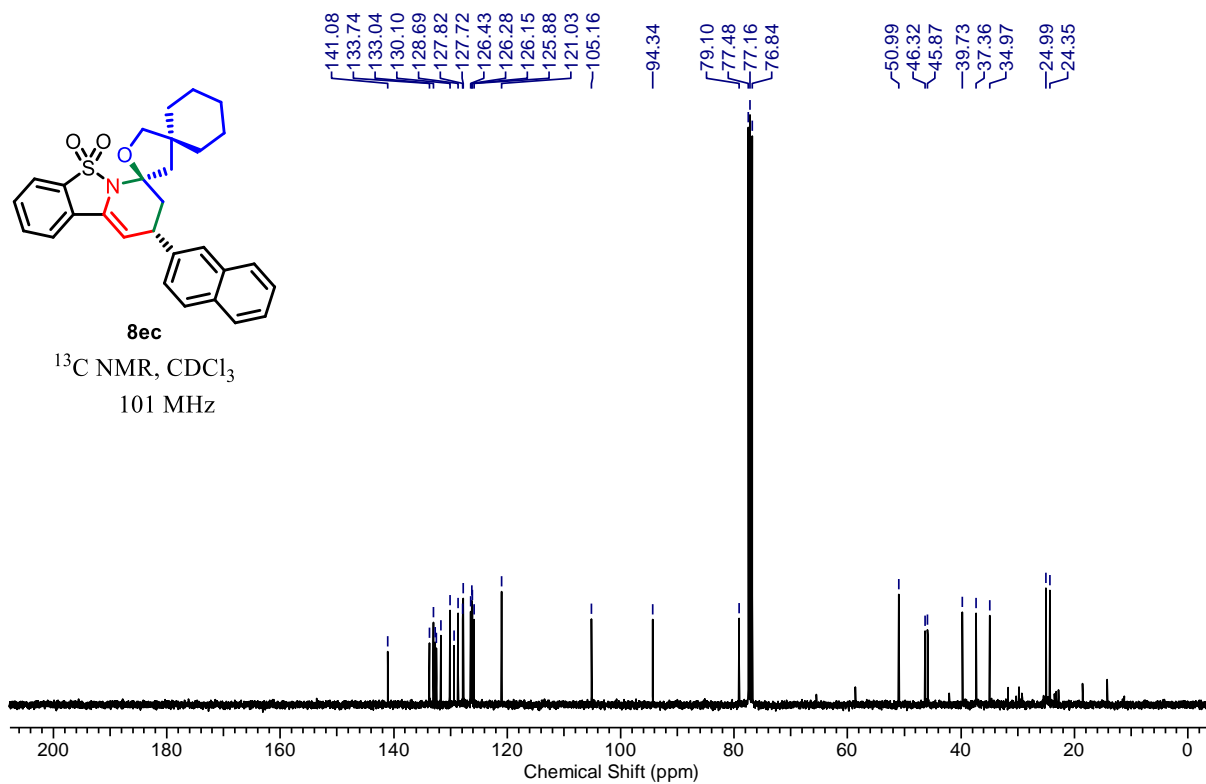

**9-(*p*-Tolyl)-8,9-dihydro-3'*H*,5'*H*-dispiro[benzo[4,5]isothiazolo[2,3-*a*]pyridine-7,2'-furan-4',1'-cyclohexane] 5,5-dioxide (8ef):**

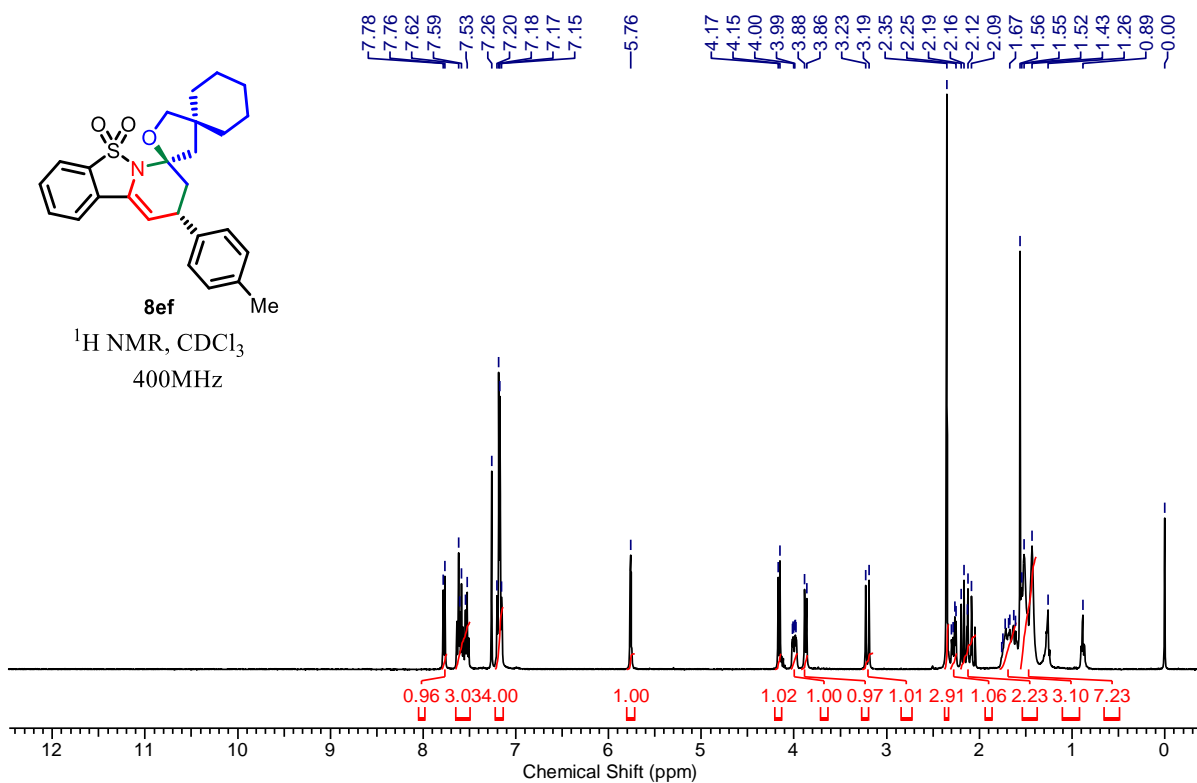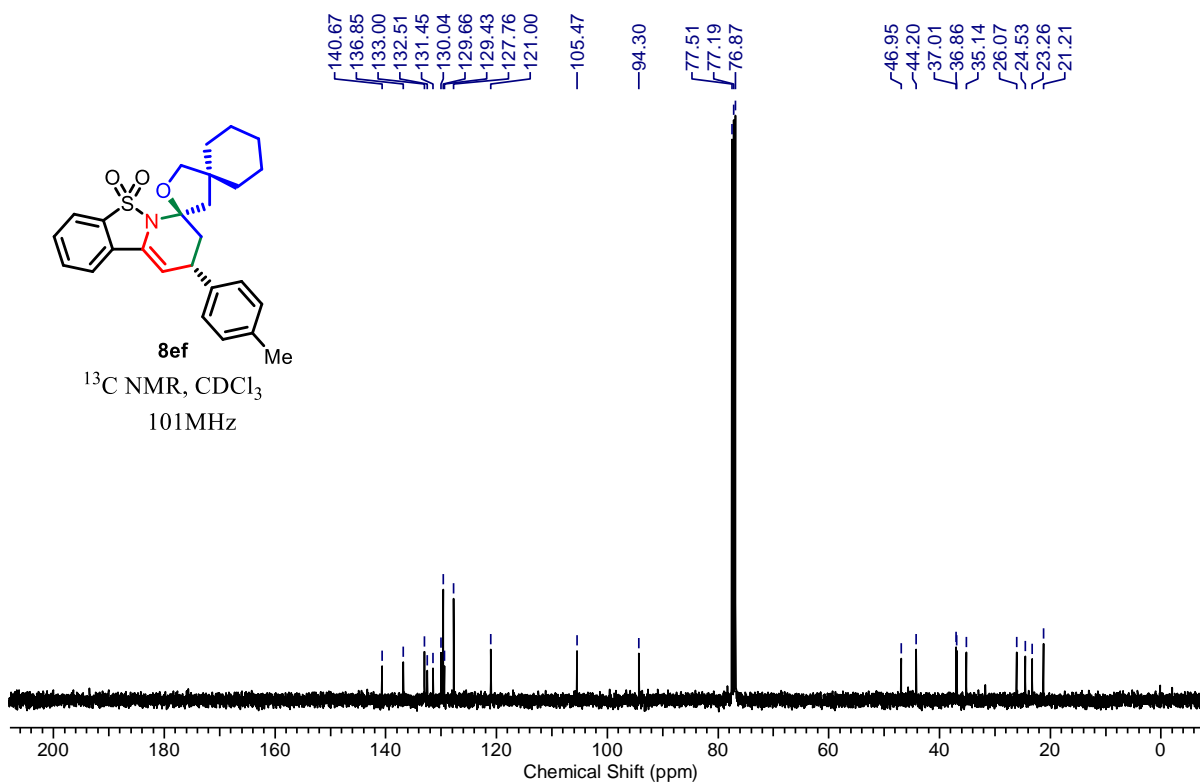

**9-(2-Methoxyphenyl)-8,9-dihydro-3*H*,5*H*-dispiro[benzo[4,5]isothiazolo[2,3-a]pyridine-7,2'-furan-4',1''-cyclohexane] 5,5-dioxide (8ei):**

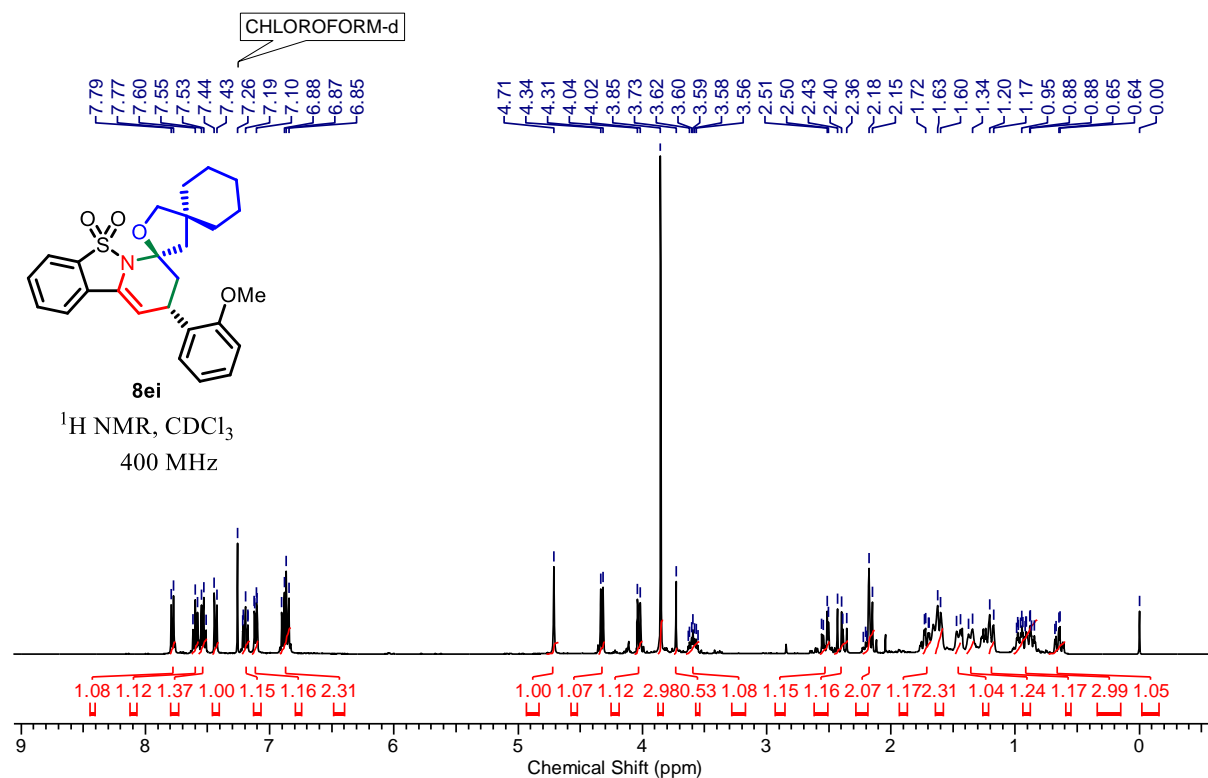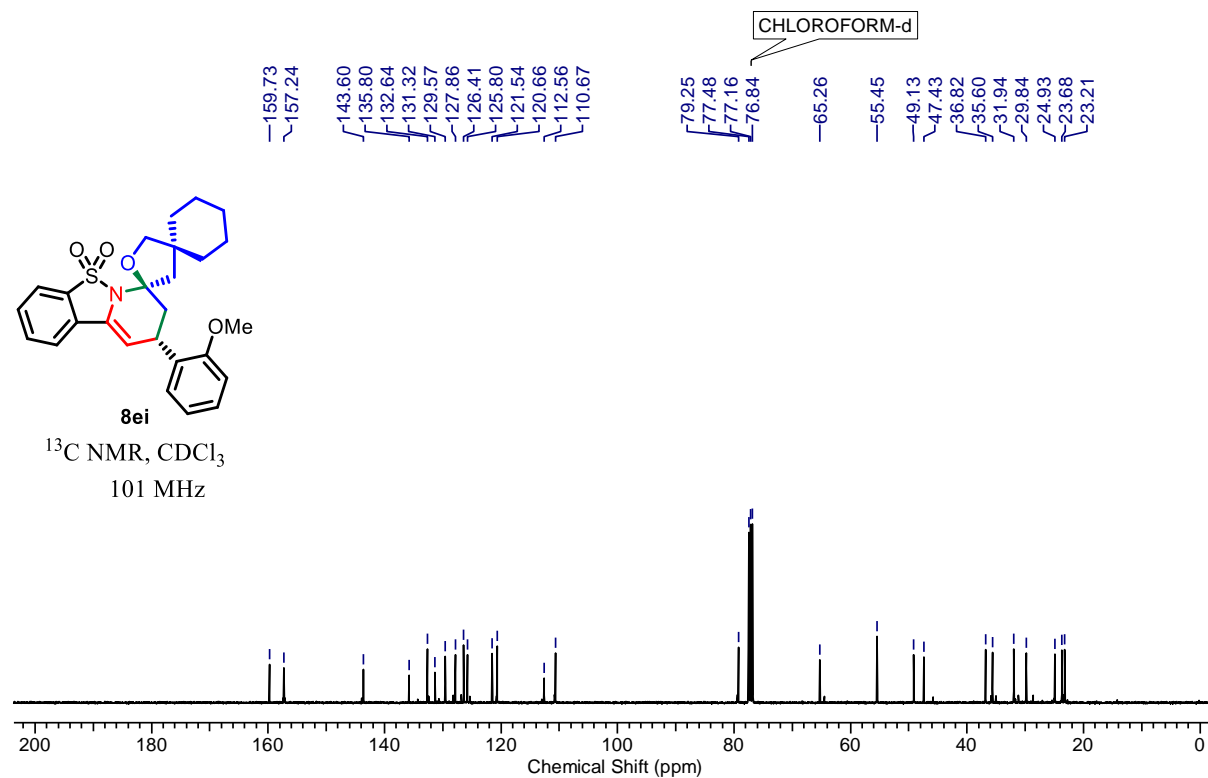

**9-(4-Methoxyphenyl)-8,9-dihydro-3*H*,5*H*-dispiro[benzo[4,5]isothiazolo[2,3-*a*]pyridine-7,2'-furan-4',1'-cyclohexane] 5,5-dioxide (8ej):**

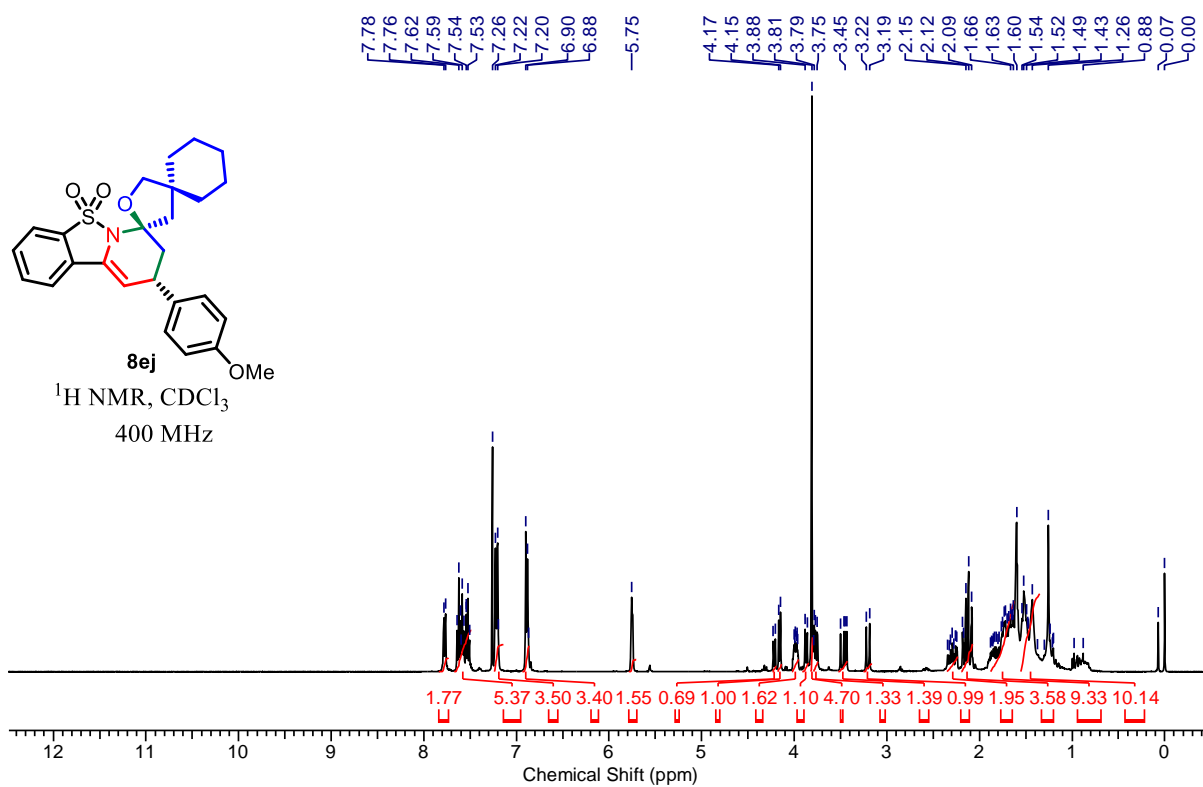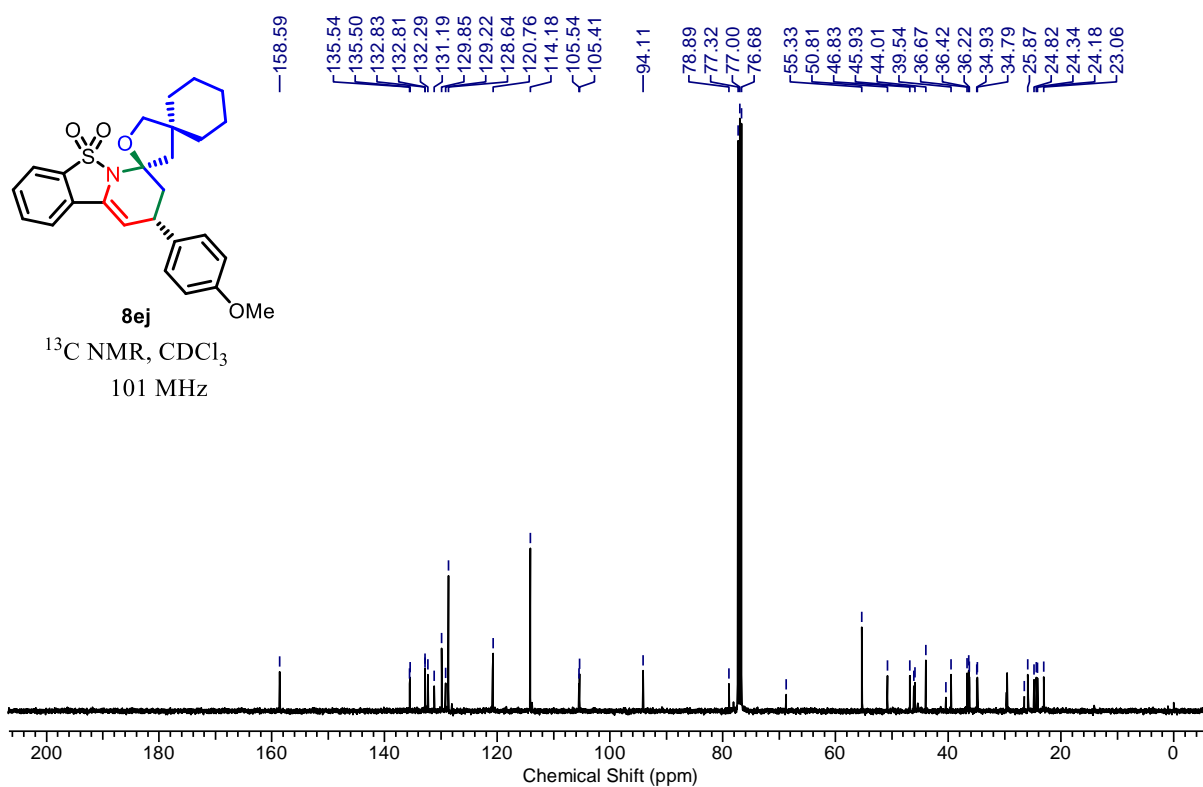

**9-(4-(Benzyloxy)phenyl)-8,9-dihydro-3*H*,5*H*-dispiro[benzo[4,5]isothiazolo[2,3-a]pyridine-7,2'-furan-4',1''-cyclohexane] 5,5-dioxide (8ek):**

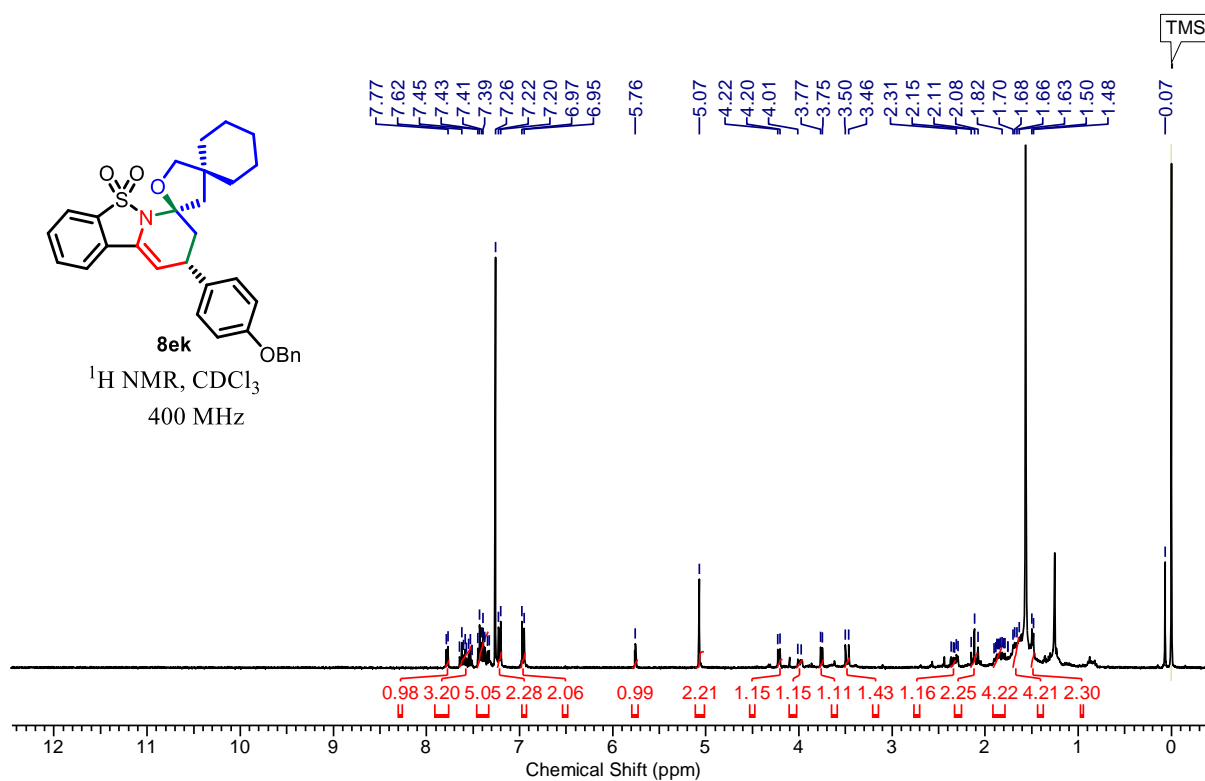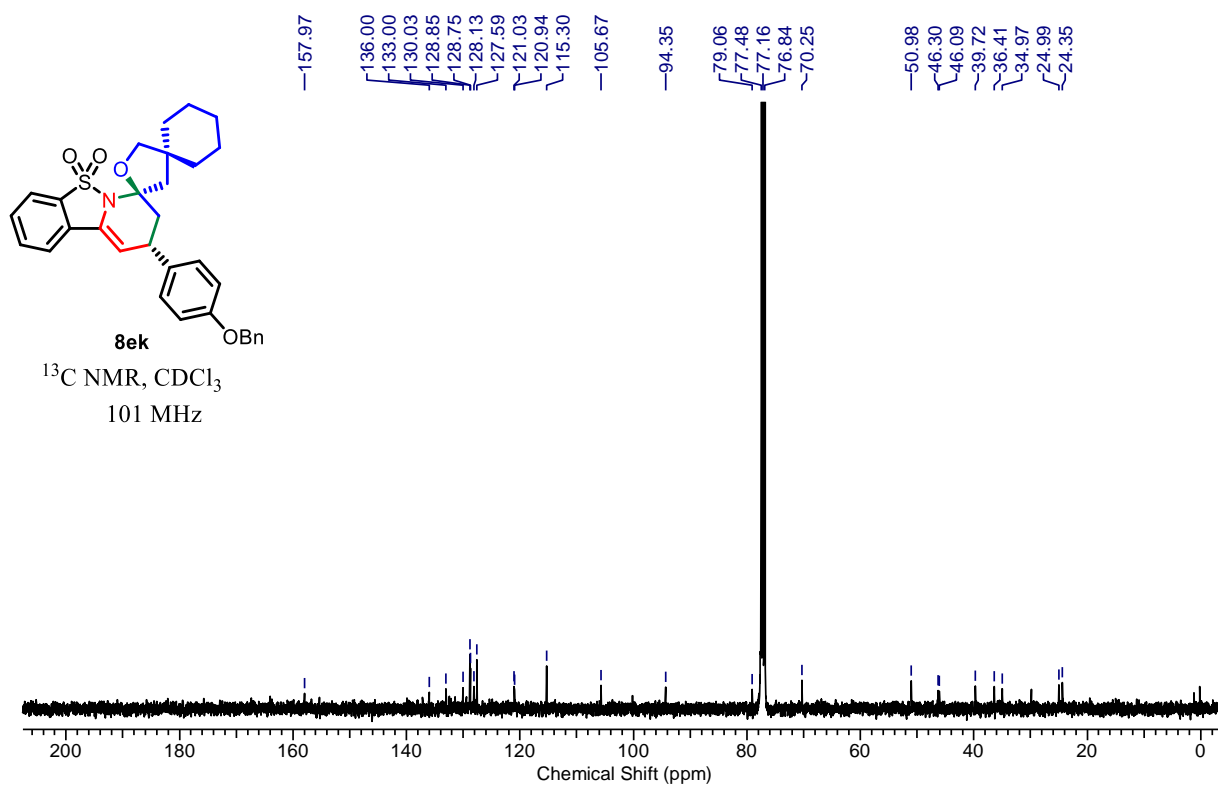

**4',4'-Dimethyl-9-(naphthalen-1-yl)-4',5',8,9-tetrahydro-3'H-spiro[benzo[4,5]isothiazolo[2,3-a]pyridine-7,2'-furan] 5,5-dioxidedioxide (8fb):**

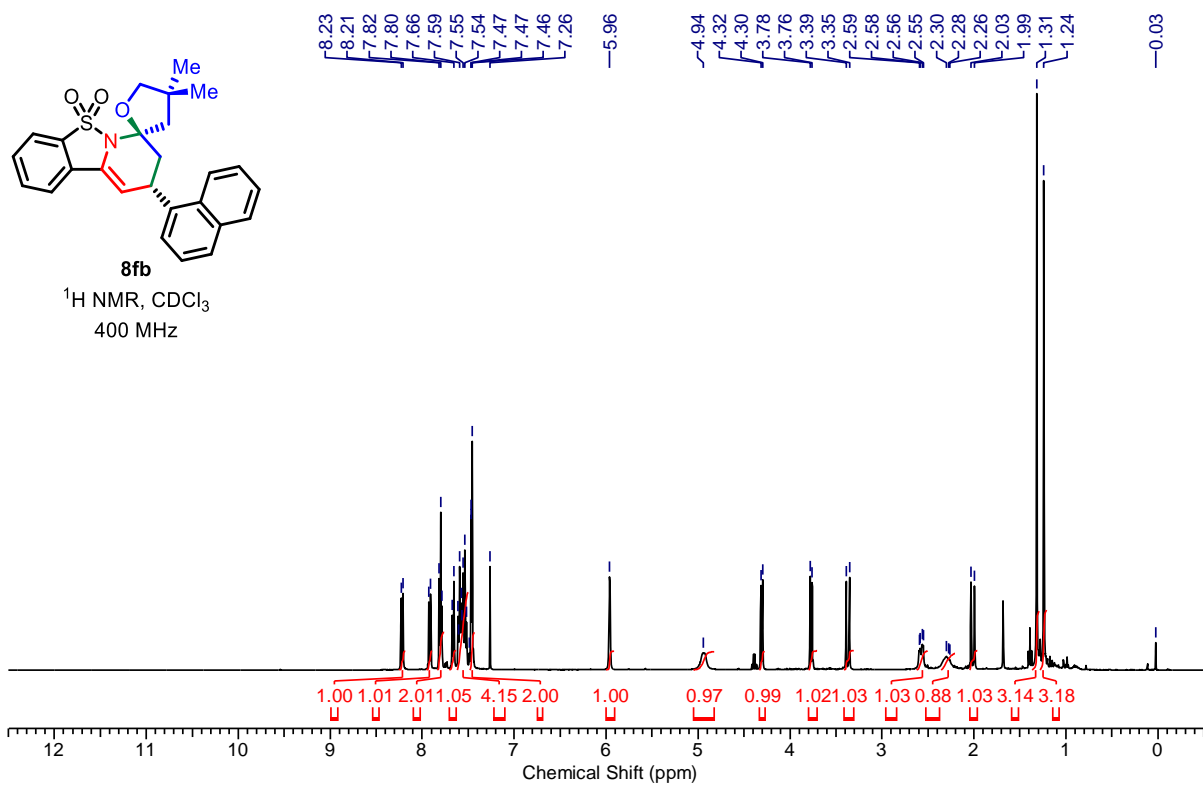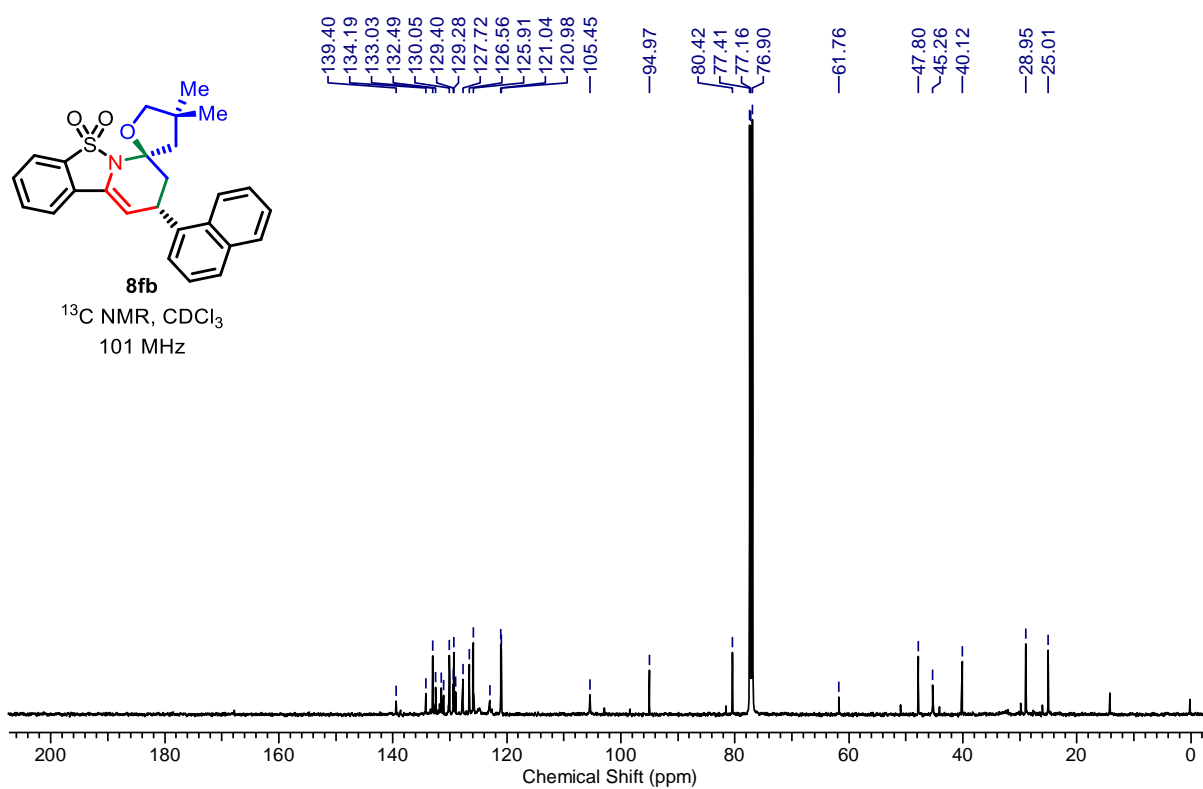



**4',4'-Dimethyl-9-(naphthalen-1-yl)-4',5',8,9-tetrahydro-3'H-spiro[benzo[4,5]isothiazolo[2,3-a]pyridine-7,2'-furan] 5,5-dioxidedioxide (8fb):**

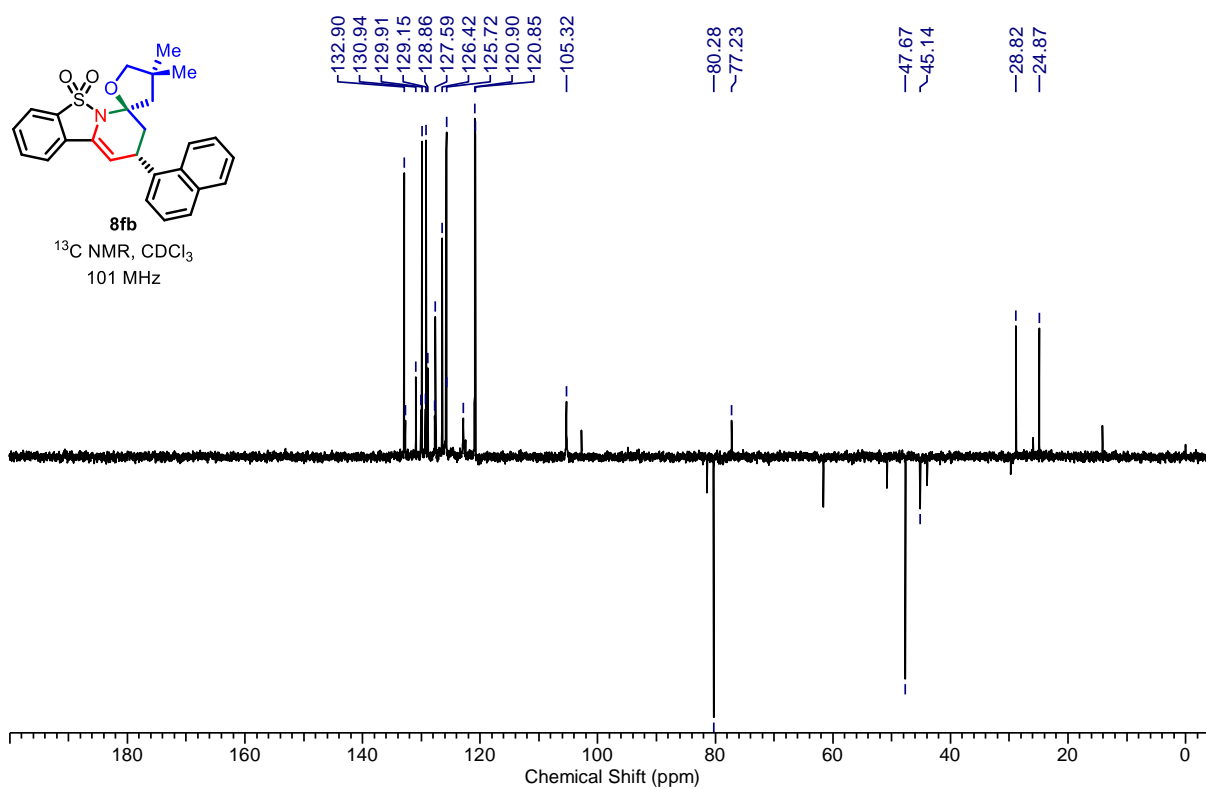

**Zoomed NOESY**

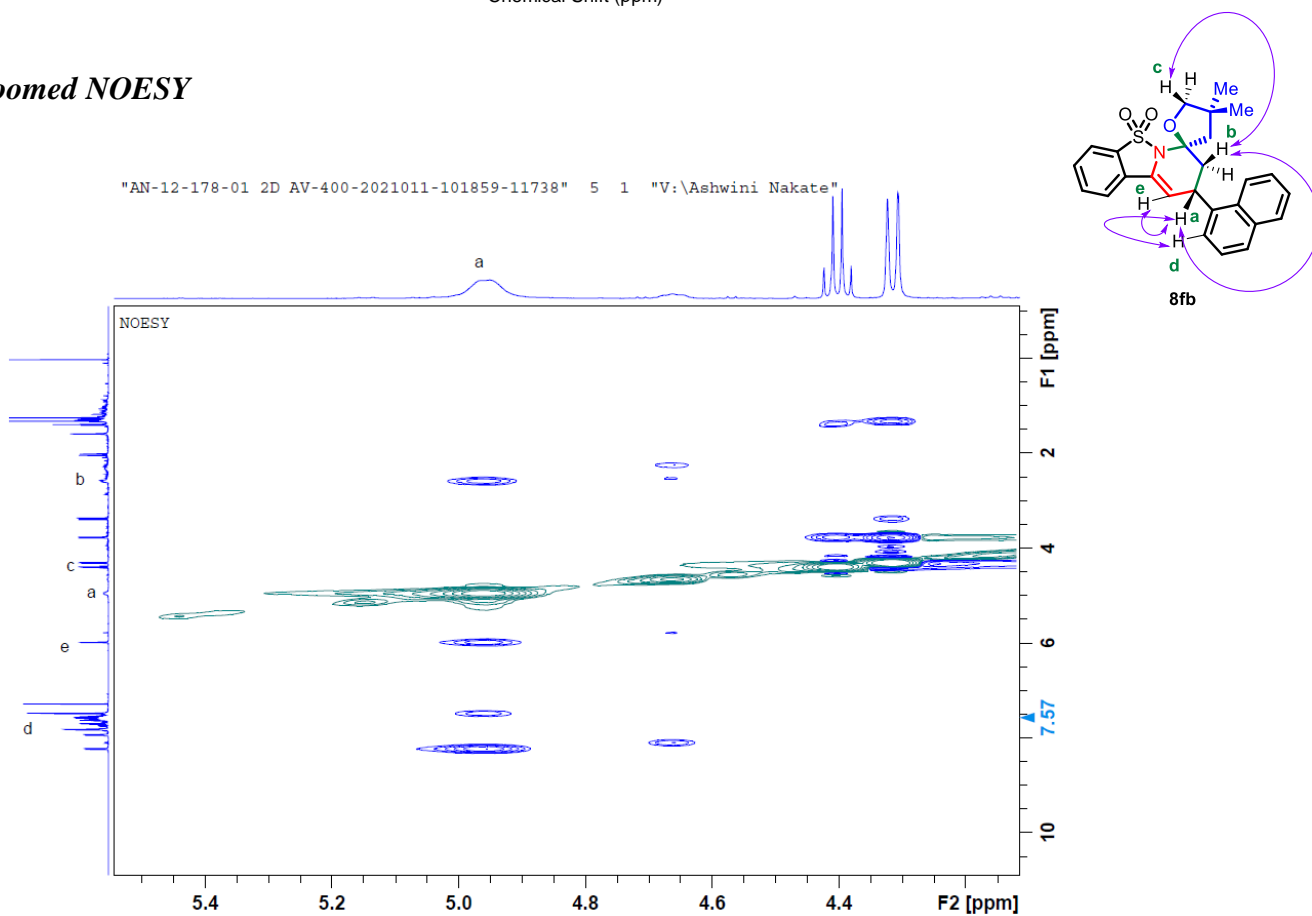

### NOESY:

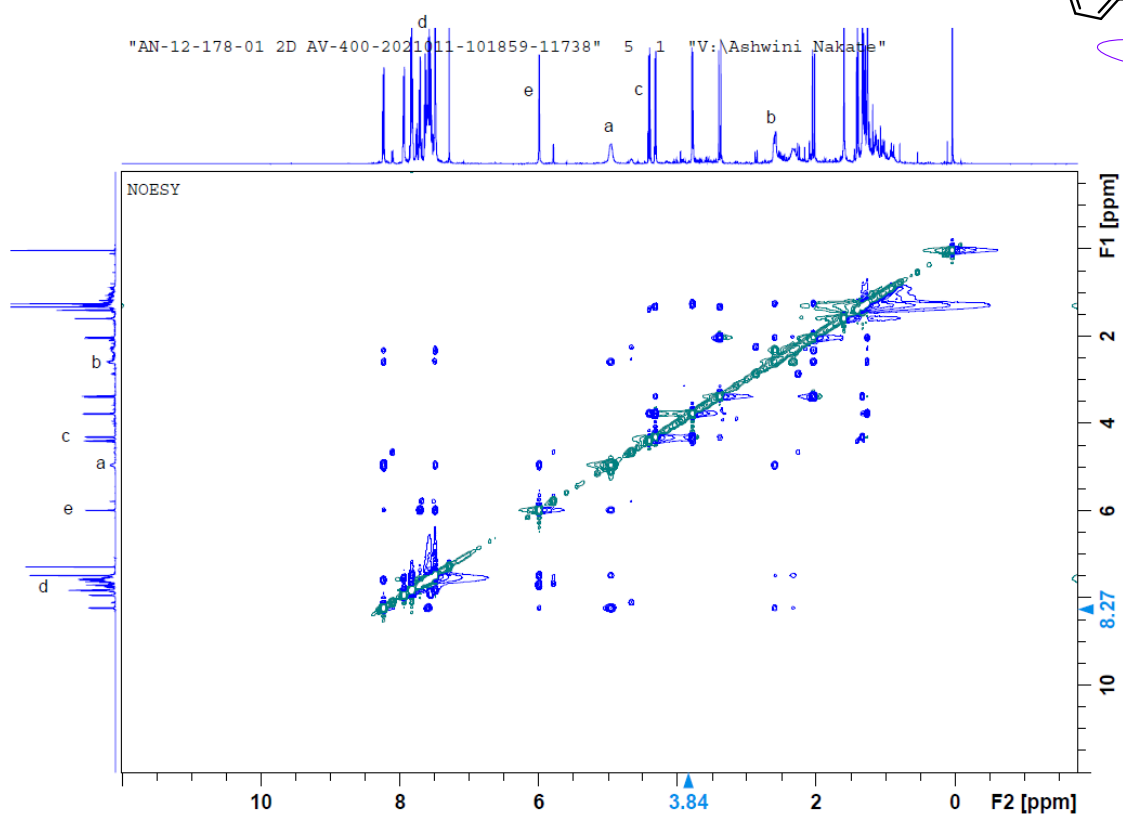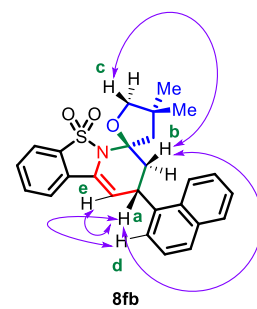

### COSY:

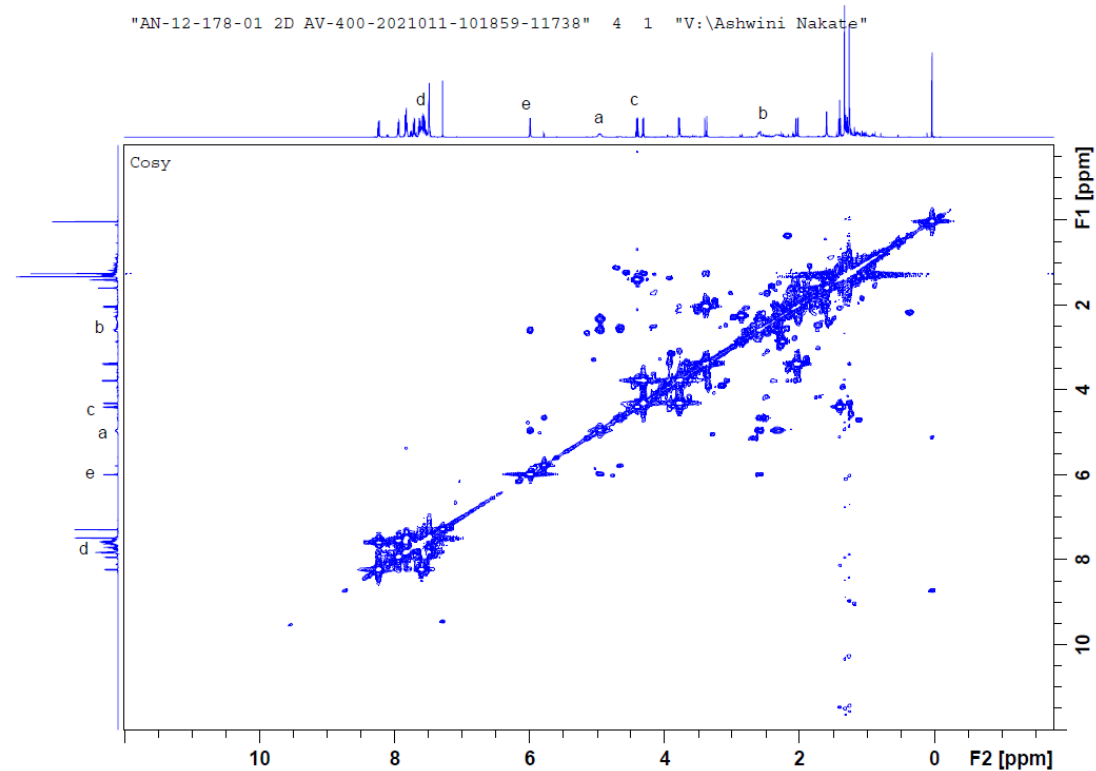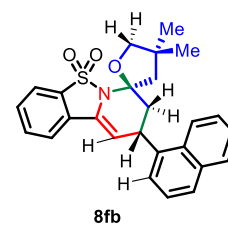

## HSQC:

"AN-12-178-01 2D AV-400-2021011-101859-11738" 6 1 "V:\Ashwini Nakate"

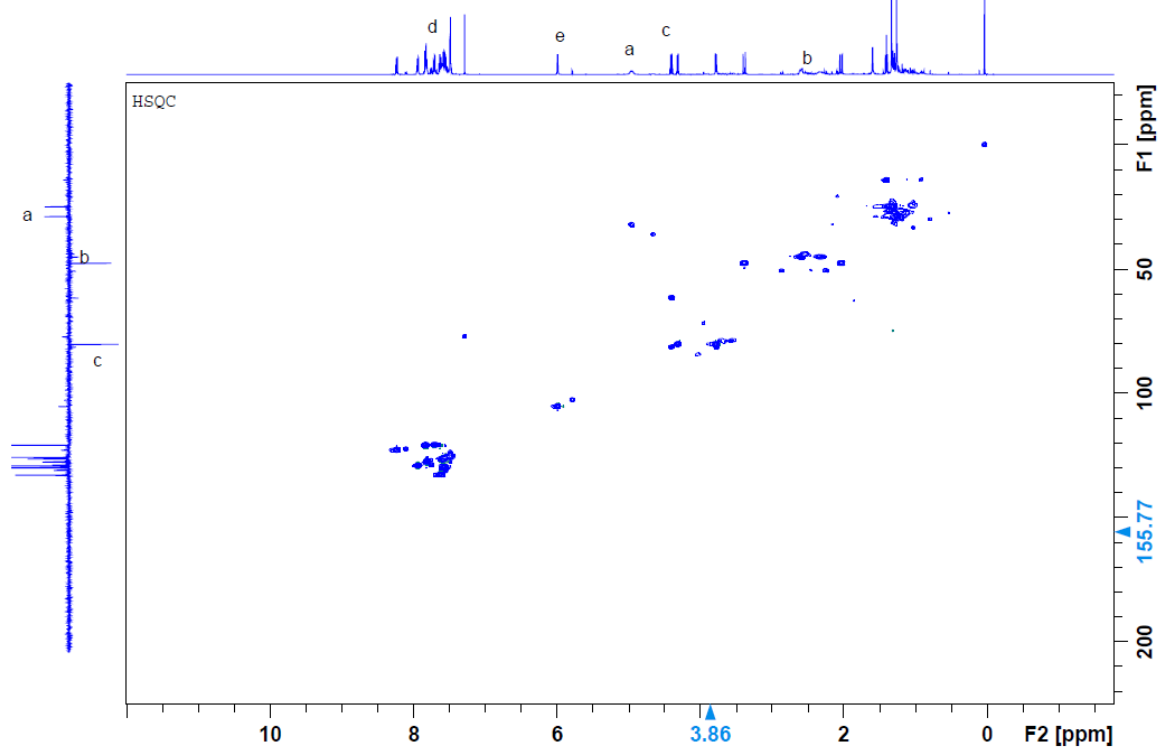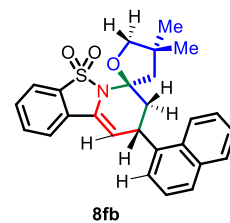

## HMBC:

"AN-12-178-01 2D AV-400-2021011-101859-11738" 7 1 "V:\Ashwini Nakate"

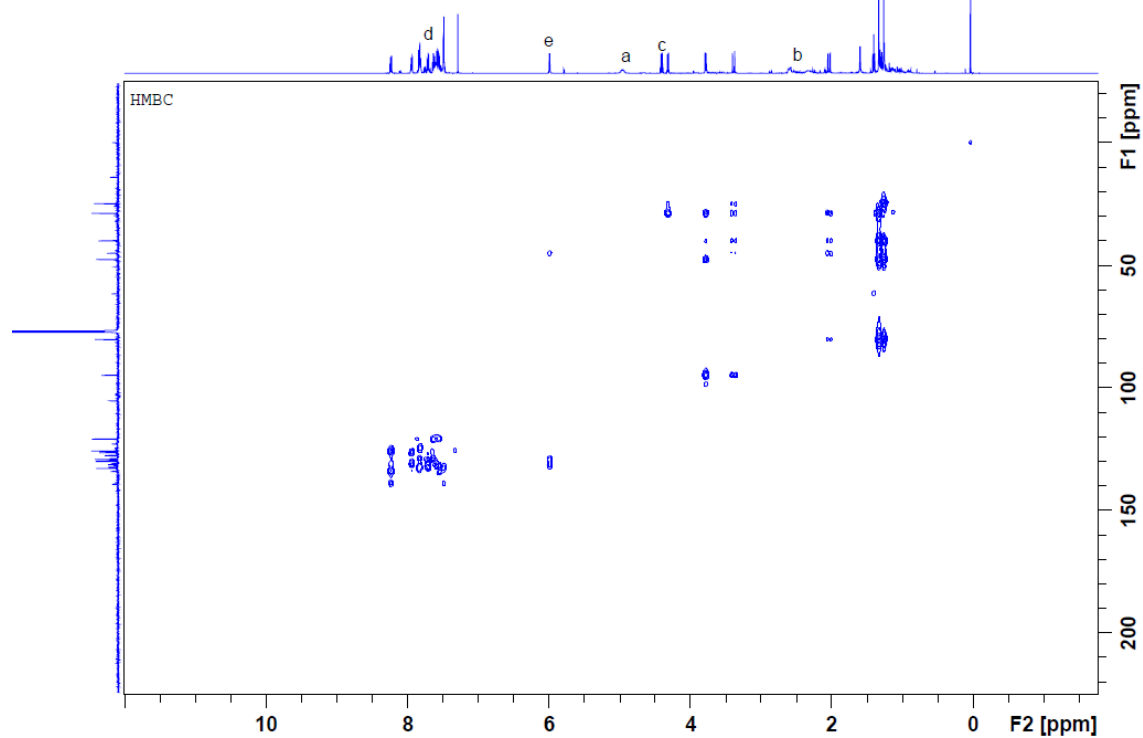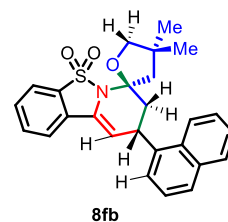

**4',4'-Dimethyl-9-(p-tolyl)-4',5',8,9-tetrahydro-3'H-spiro[benzo[4,5]isothiazolo[2,3-a]pyridine-7,2'-furan] 5,5-dioxide (8ff):**

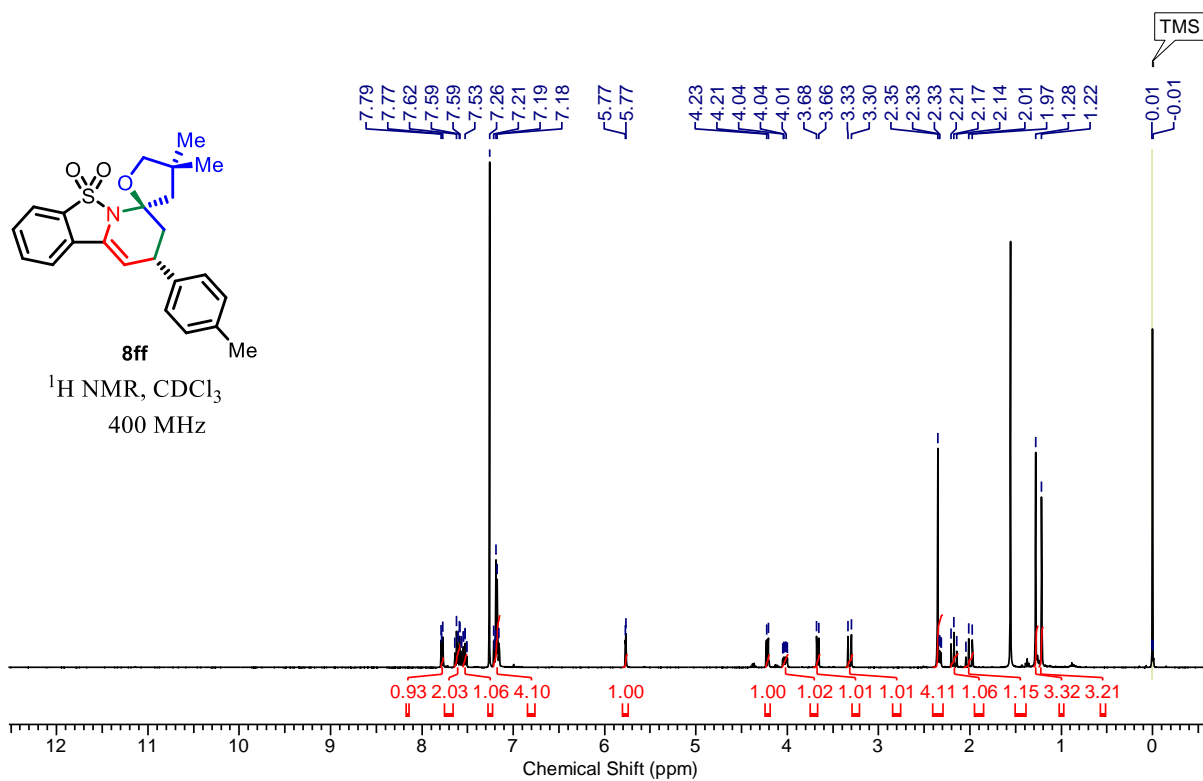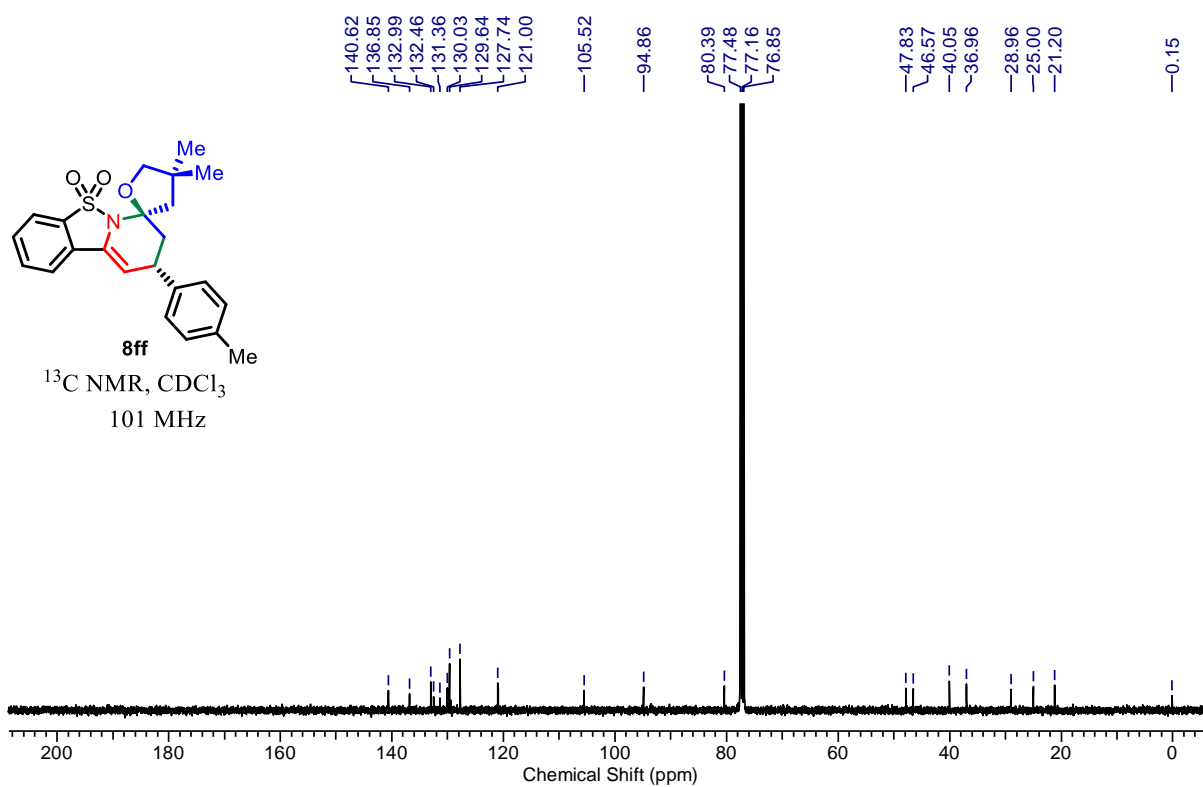

**9-(2-Bromophenyl)-4',4'-dimethyl-4',5',8,9-tetrahydro-3'H-spiro[benzo[4,5]isothiazolo[2,3-a]pyridine-7,2'-furan] 5,5-dioxide (8fg):**

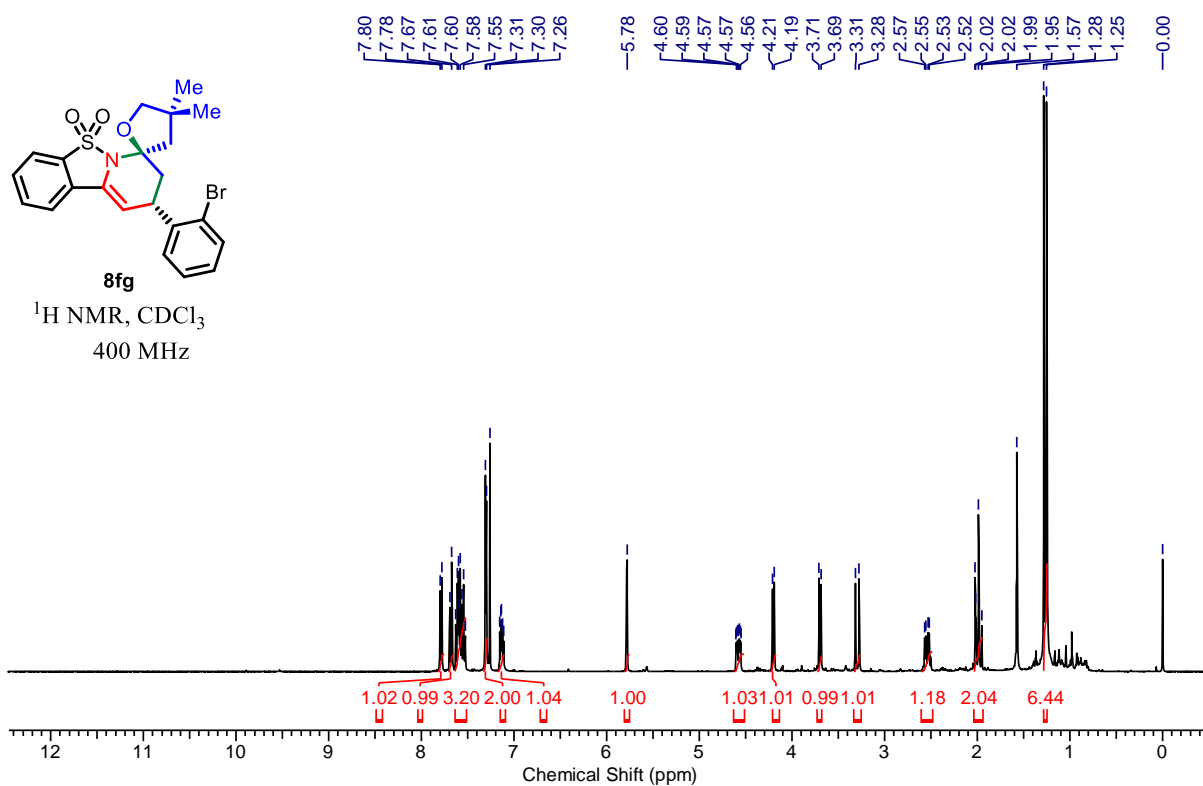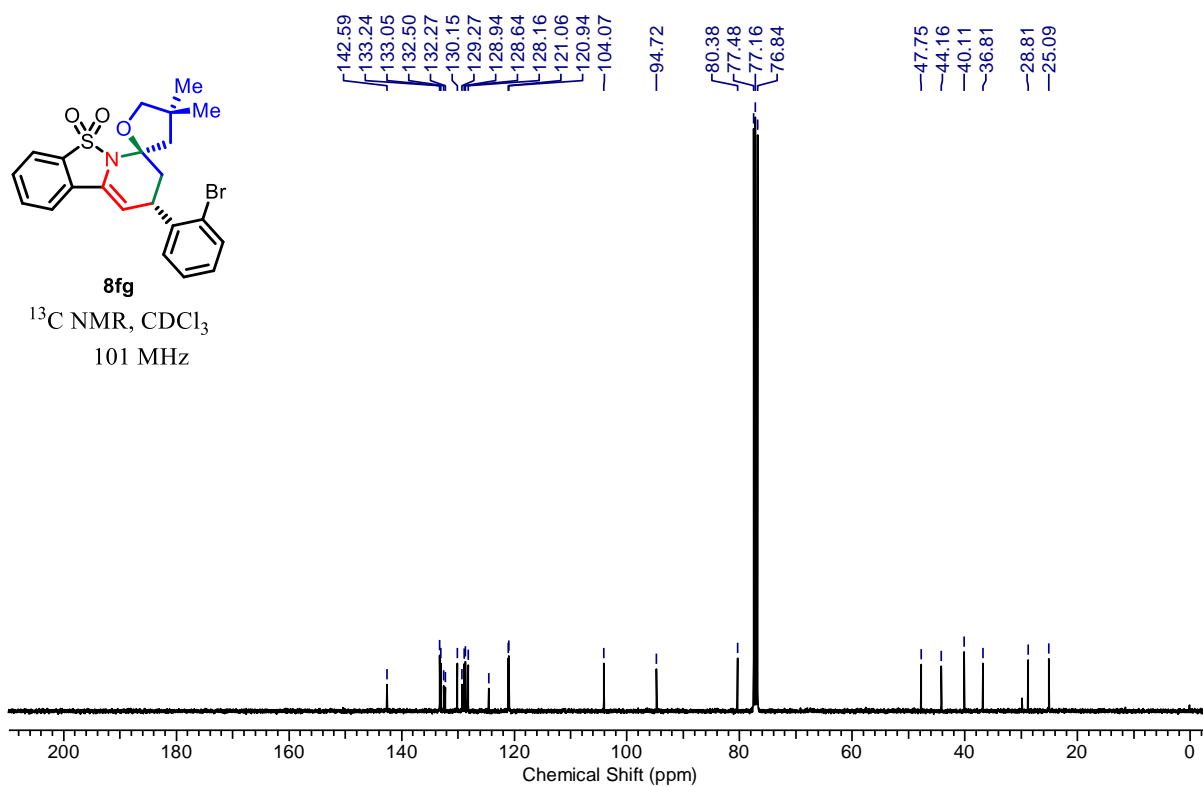

**9-(2-Bromophenyl)-4',4'-dimethyl-4',5',8,9-tetrahydro-3'H-spiro[benzo[4,5]isothiazolo[2,3-a]pyridine-7,2'-furan] 5,5-dioxide (8fg):**

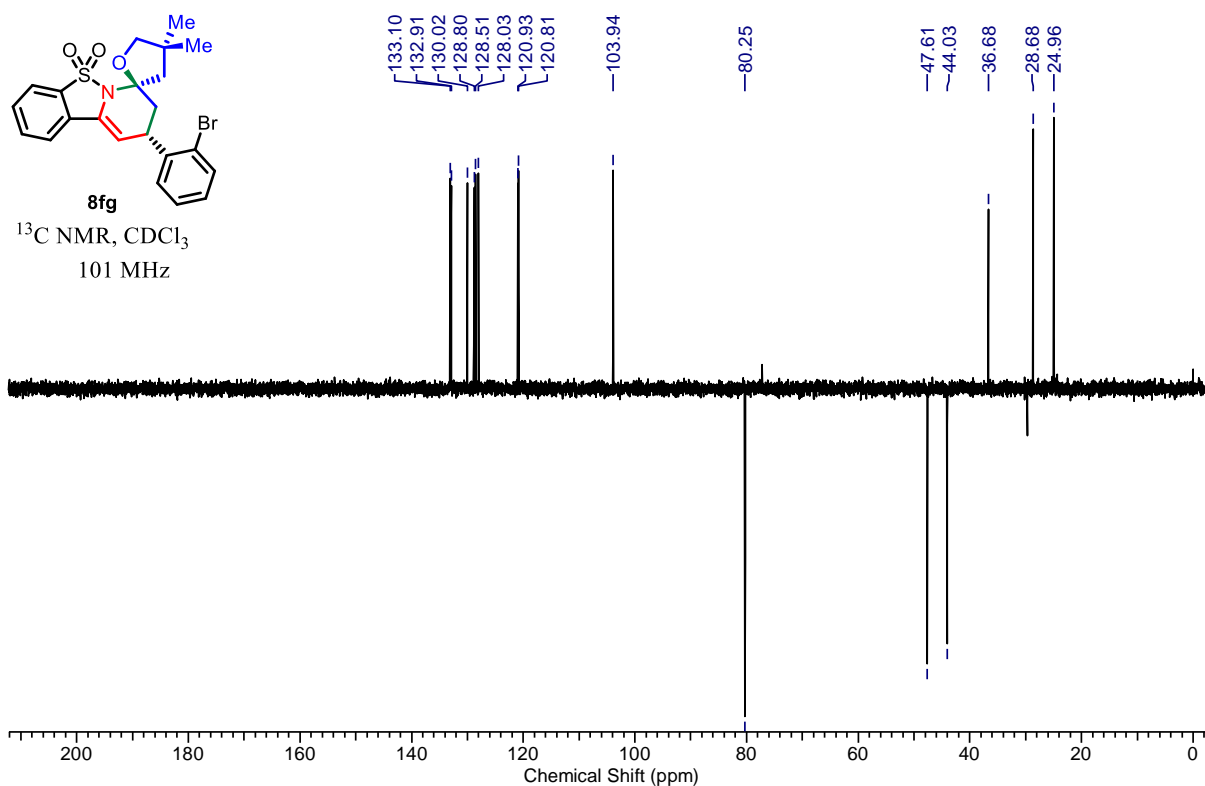

**NOESY:**

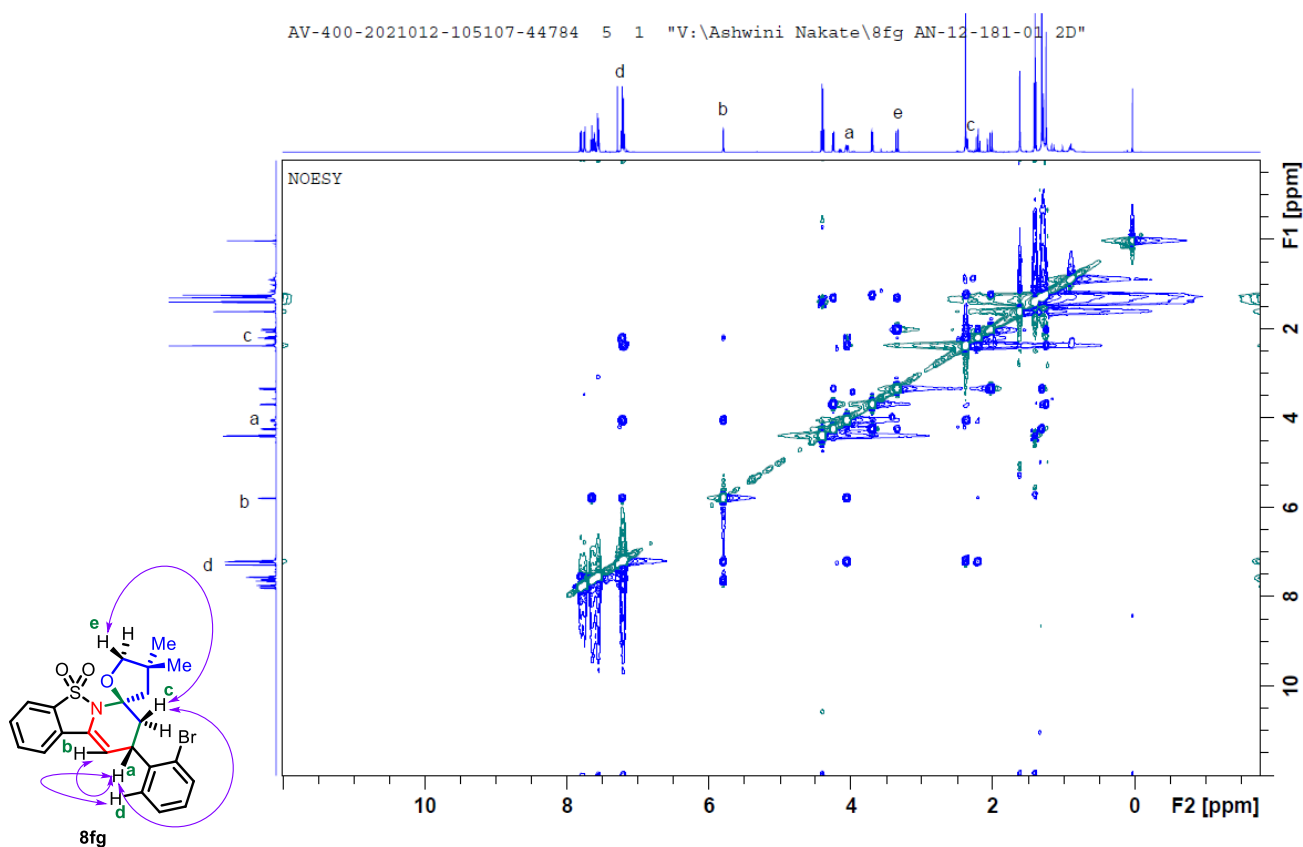

## COSY:

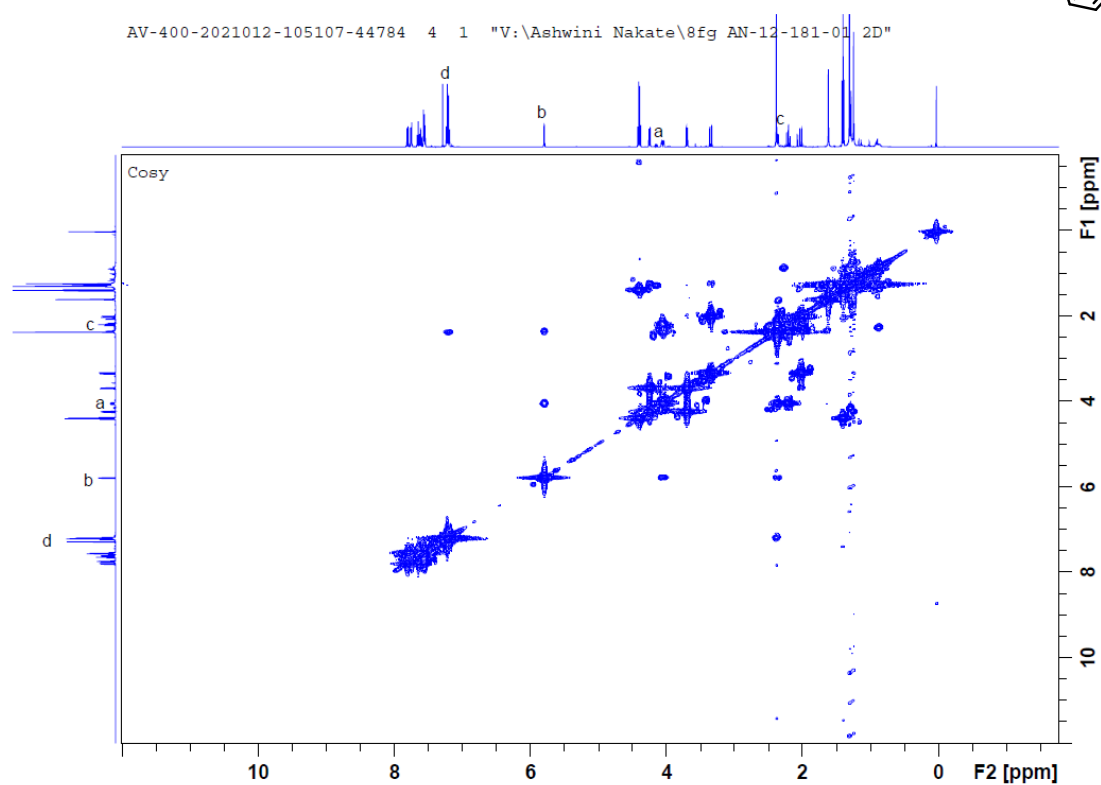

## HSQC:

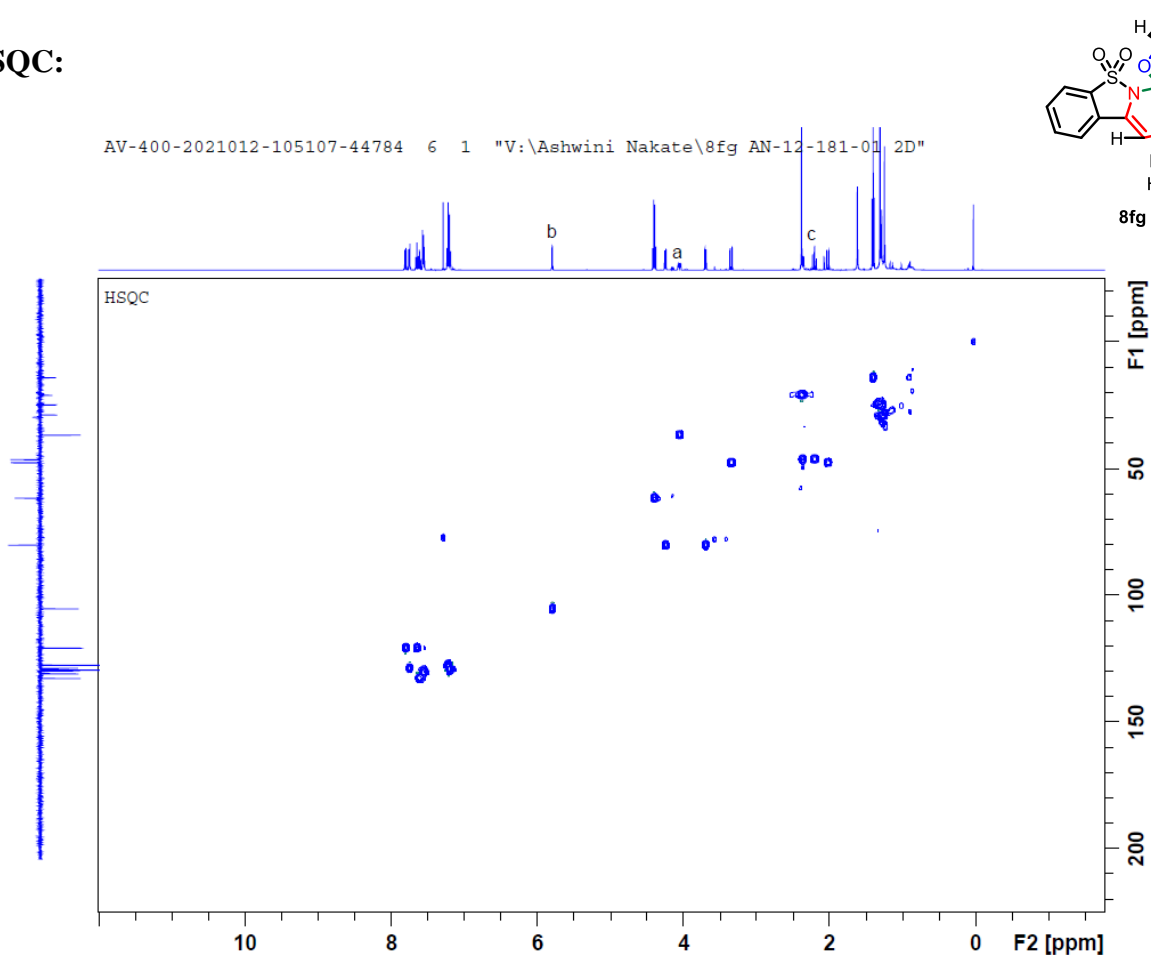

# HMBC:

AV-400-2021012-105107-44784 7 1 "V:\Ashwini Nakate\8fg AN-12-181-01\_2D"

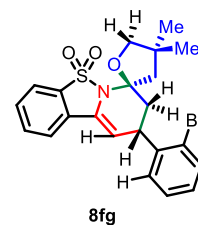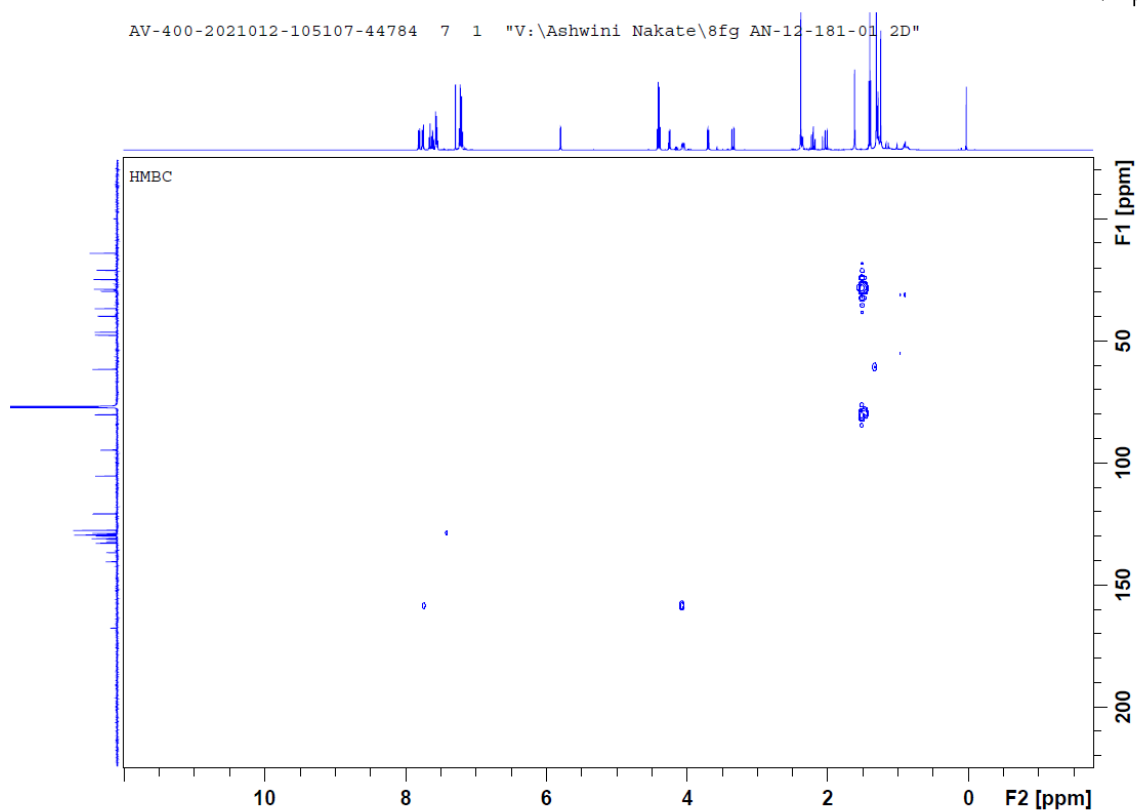



**9-(Naphthalen-1-yl)-4',4'-diphenyl-4',5',8,9-tetrahydro-3'H-spiro[benzo[4,5]isothiazolo[2,3-a]pyridine-7,2'-furan] 5,5-dioxide (8gb):**

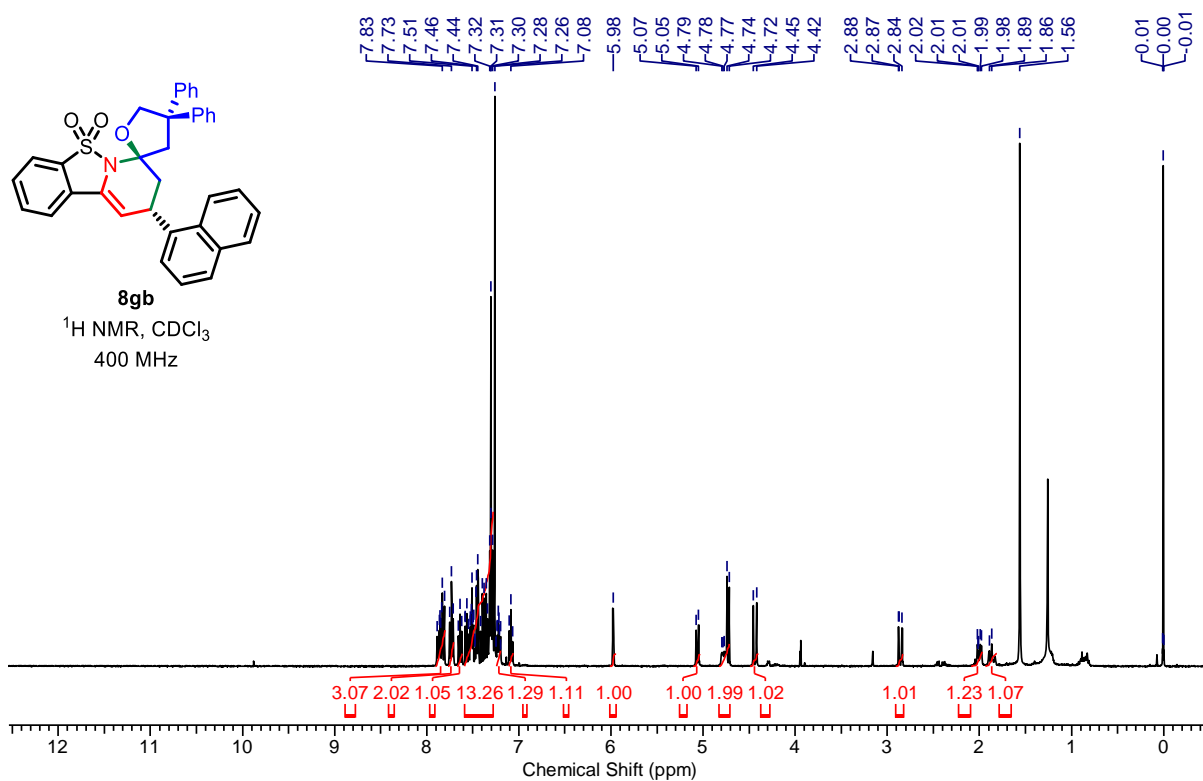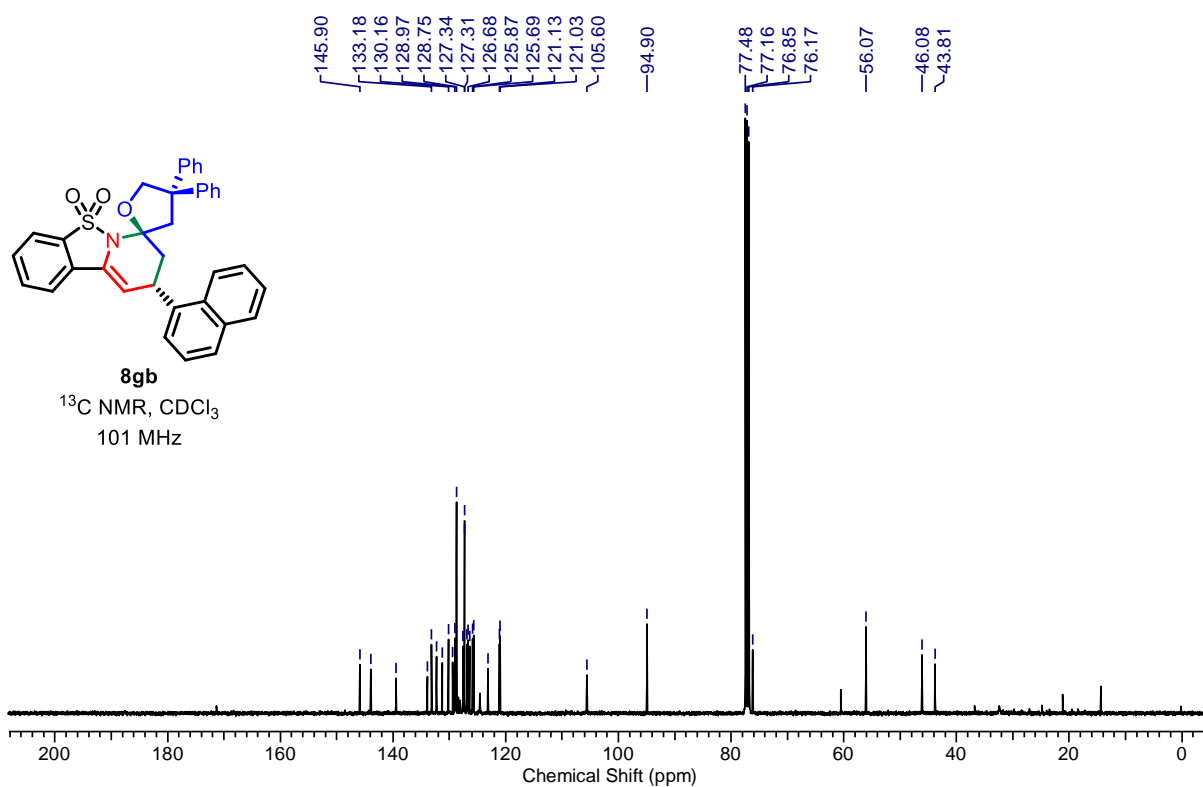

**4',4'-Diphenyl-9-(p-tolyl)-4',5',8,9-tetrahydro-3'H-spiro[benzo[4,5]isothiazolo[2,3-a]pyridine-7,2'-furan] 5,5-dioxide (8gf):**

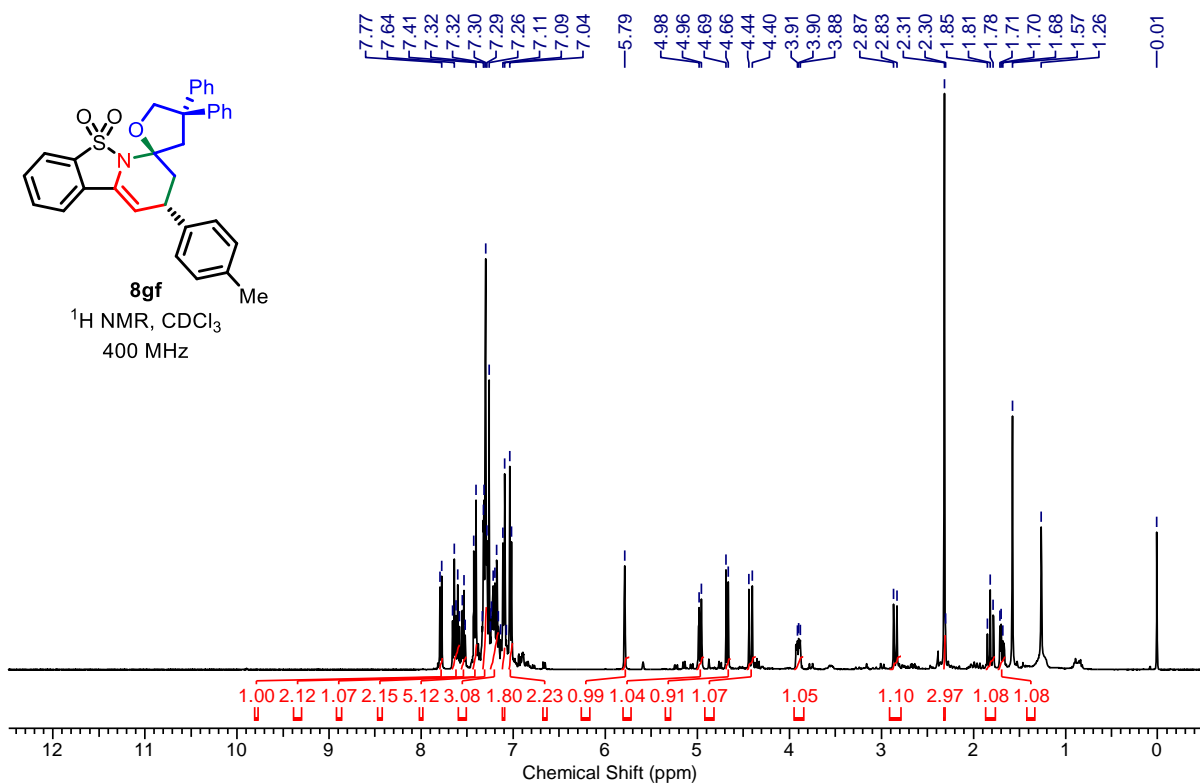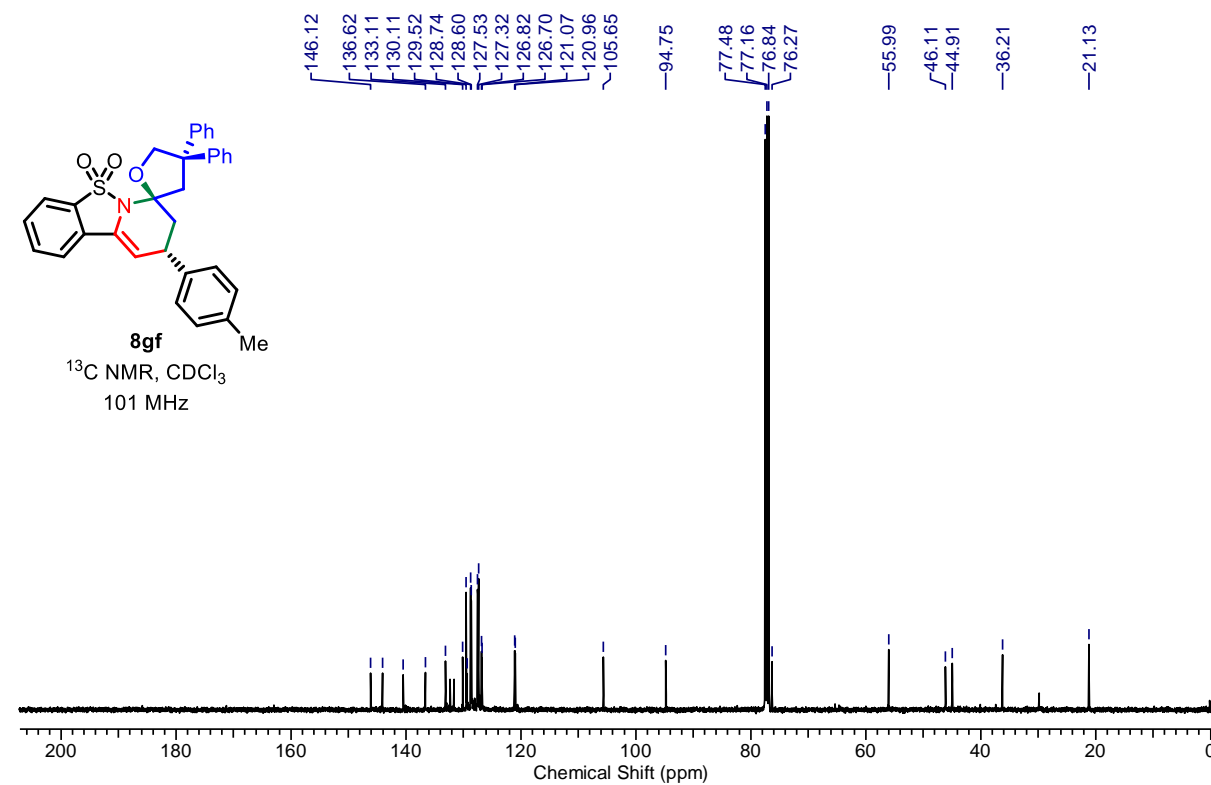

**9-(2-Bromophenyl)-4',4'-diphenyl-4',5',8,9-tetrahydro-3'H-spiro[benzo[4,5]isothiazolo[2,3-a]pyridine-7,2'-furan] 5,5-dioxide (8gg):**

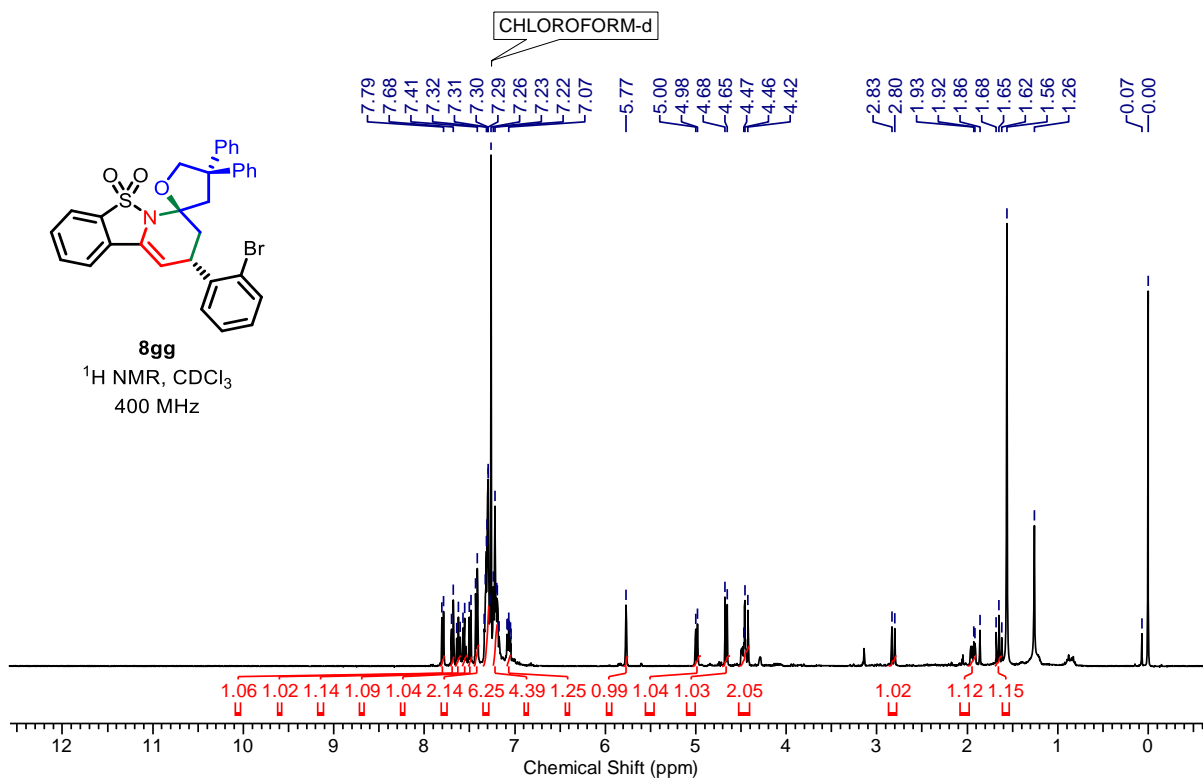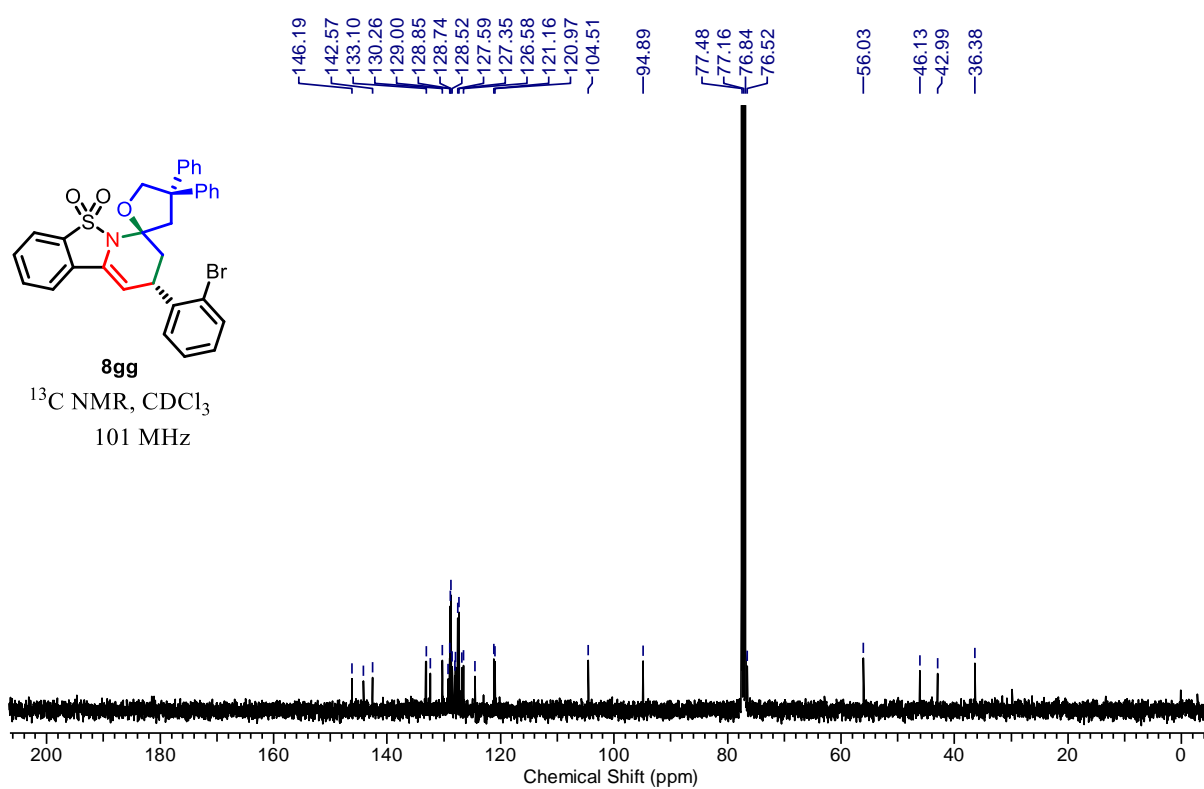

**9-(2-Methoxyphenyl)-4',4'-diphenyl-4',5',8,9-tetrahydro-3'H-spiro[benzo[4,5]isothiazolo[2,3-a]pyridine-7,2'-furan] 5,5-dioxide (8gi):**

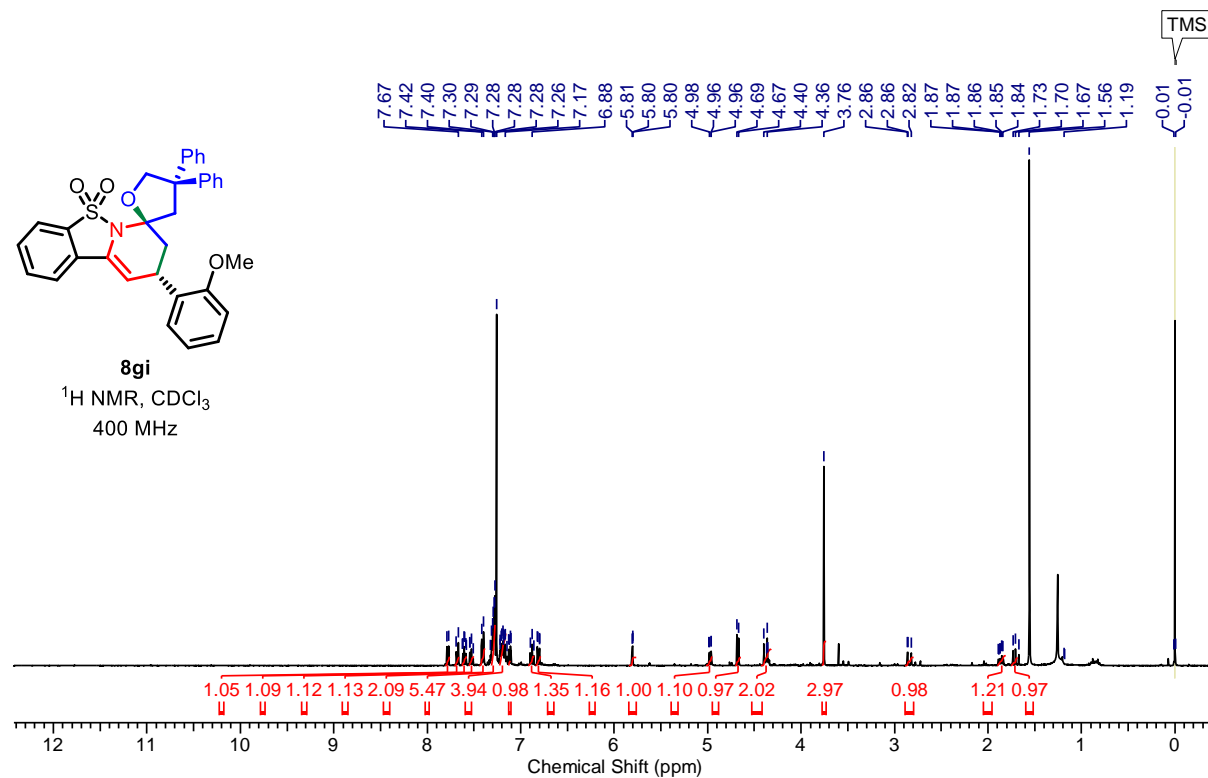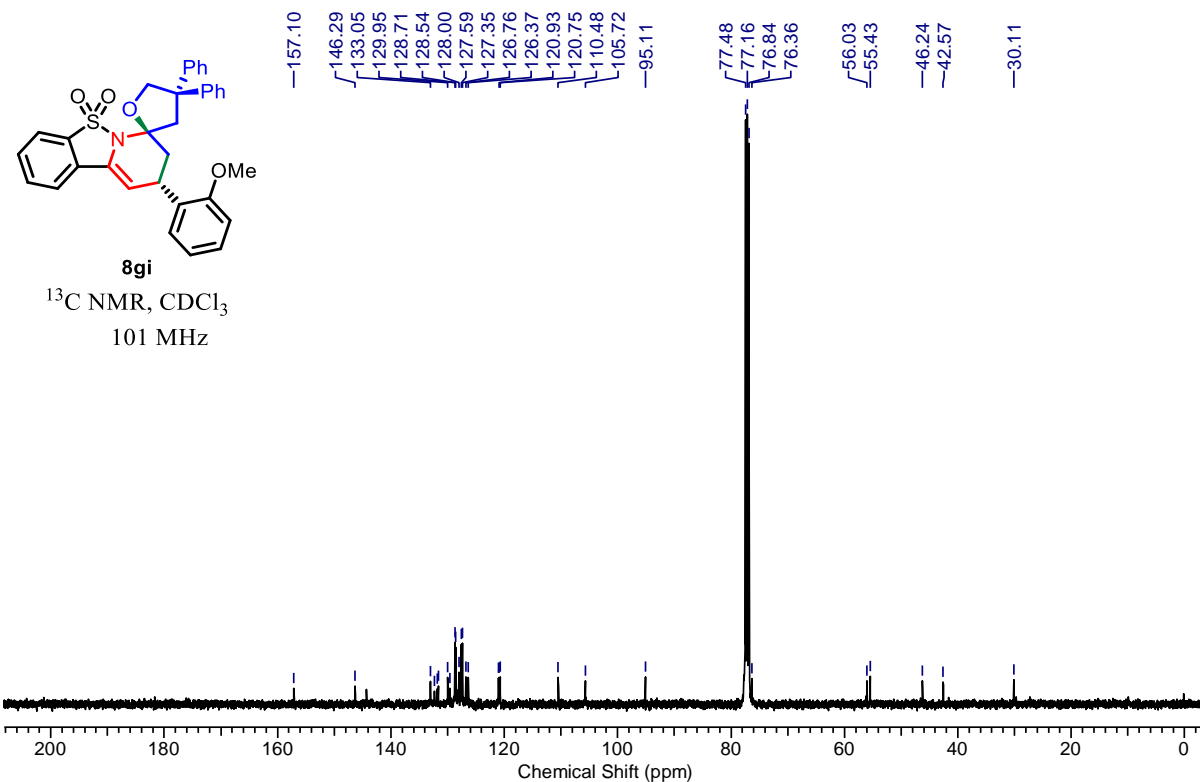

**9-(4-Methoxyphenyl)-4',4'-diphenyl-4',5',8,9-tetrahydro-3'H-spiro[benzo[4,5]isothiazolo[2,3-a]pyridine-7,2'-furan] 5,5-dioxide (8gj):**

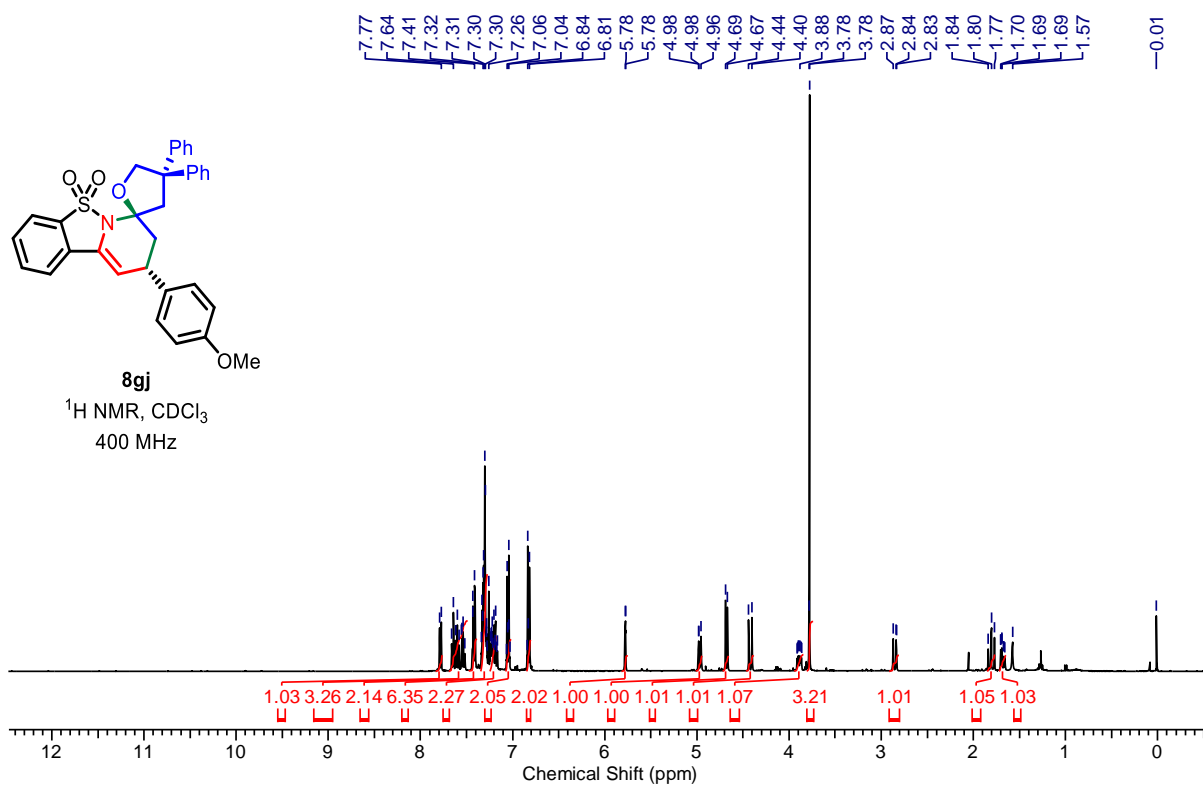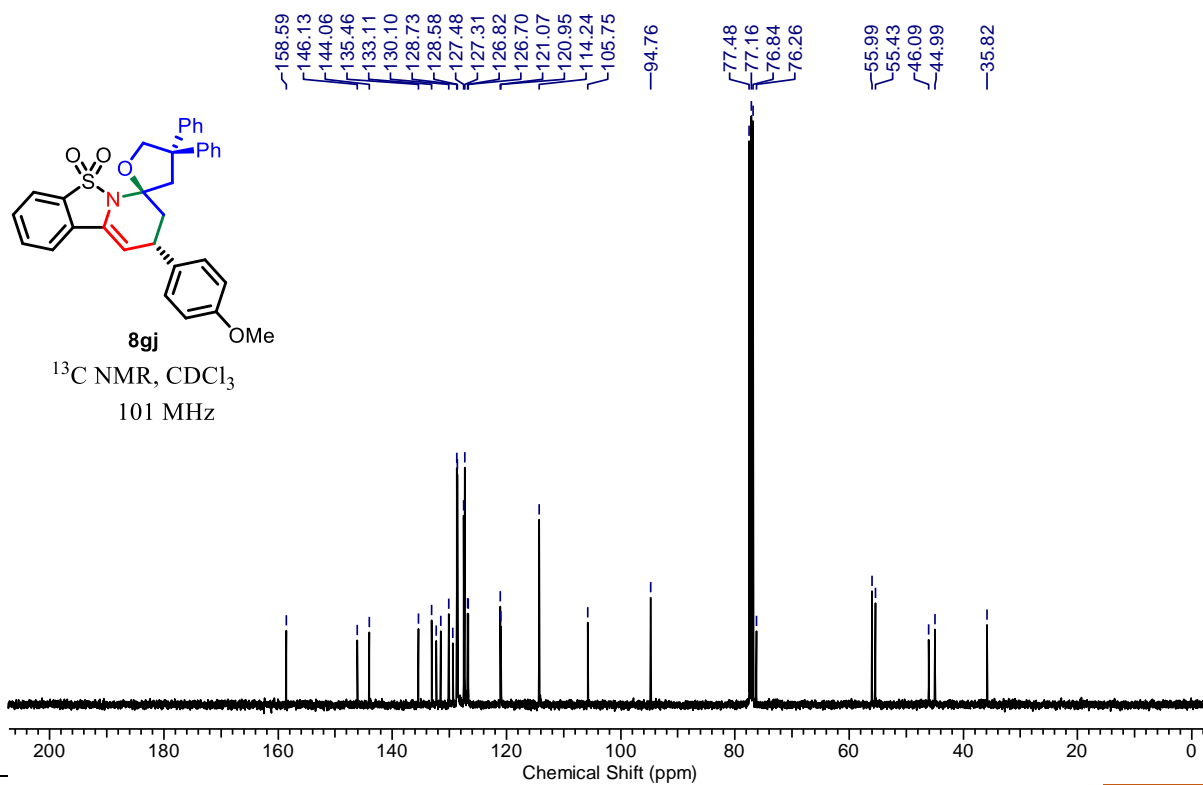

**8-(3-Hydroxypropyl)-7-methyl-9-phenyl-8,9,10,10a-tetrahydro-7H-benzo[4,5]isothiazolo[2,3-a]pyridine 5,5-dioxide (9aa):**

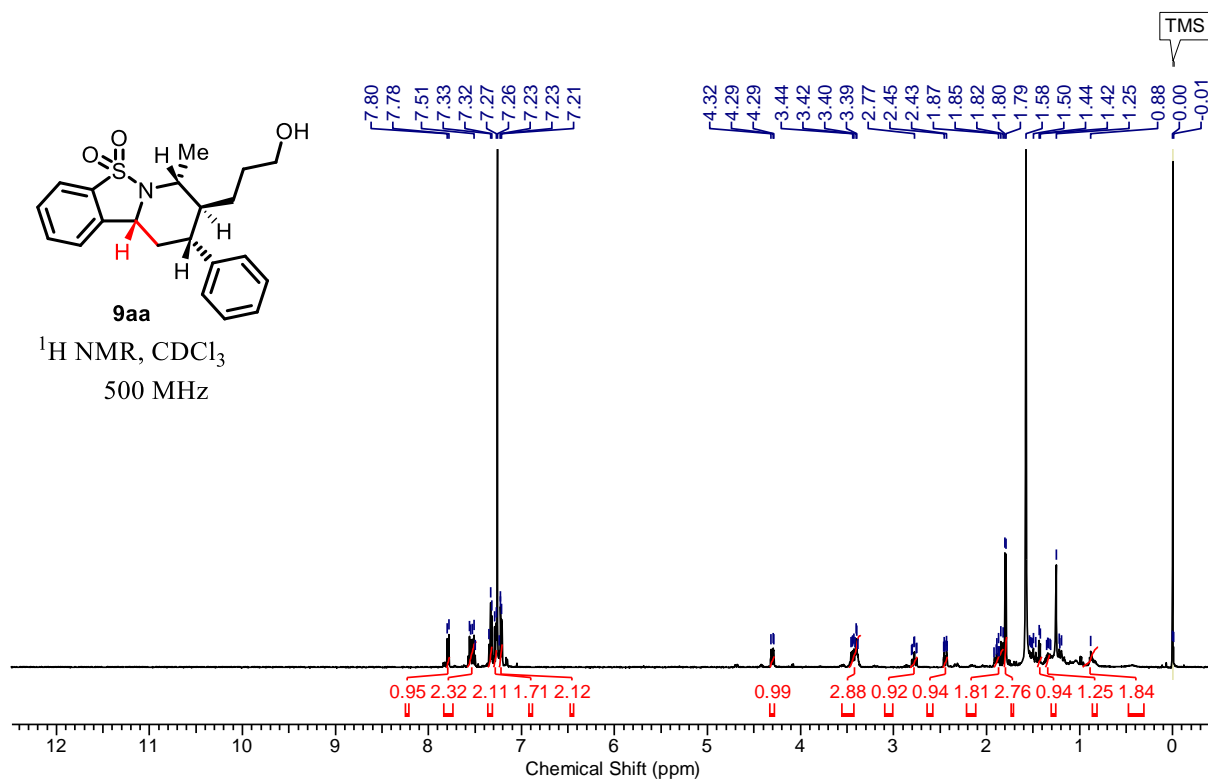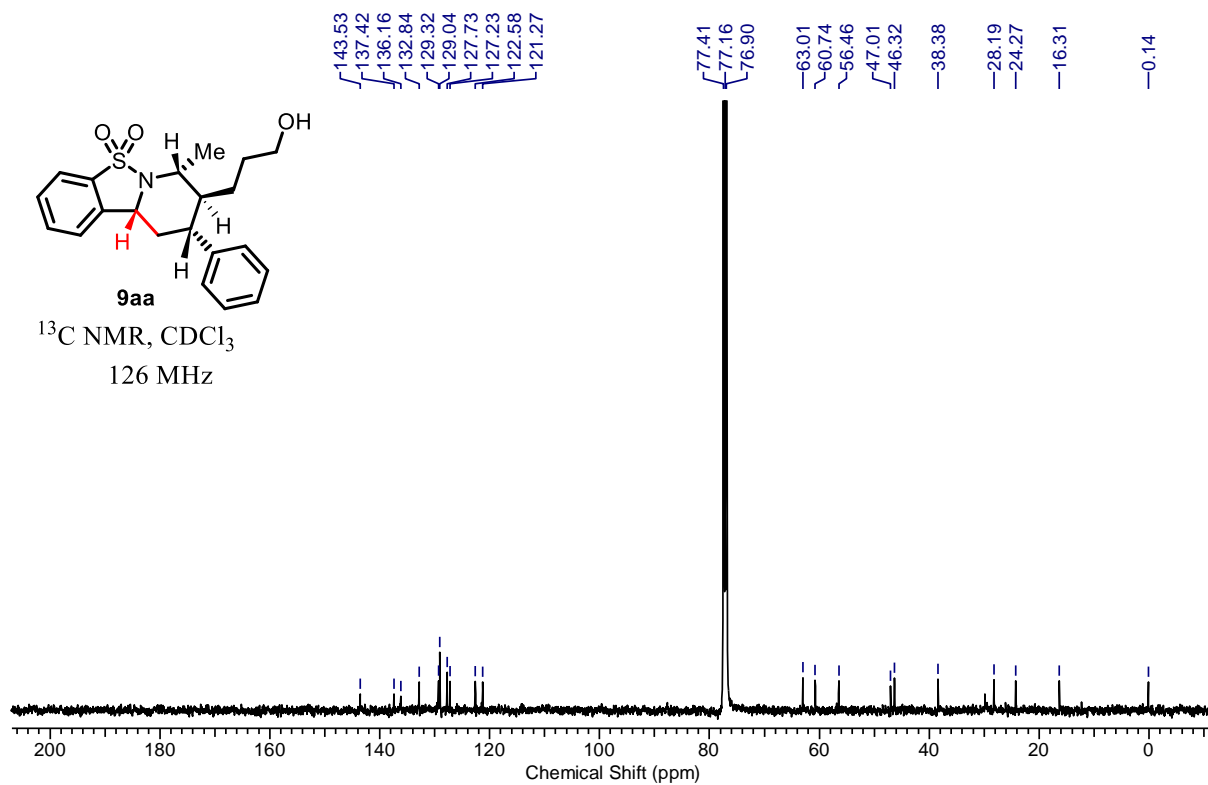

**8-(3-Hydroxypropyl)-7-methyl-9-phenyl-8,9,10,10a-tetrahydro-7H-benzo[4,5]isothiazolo[2,3-a]pyridine 5,5-dioxide (9aa):**

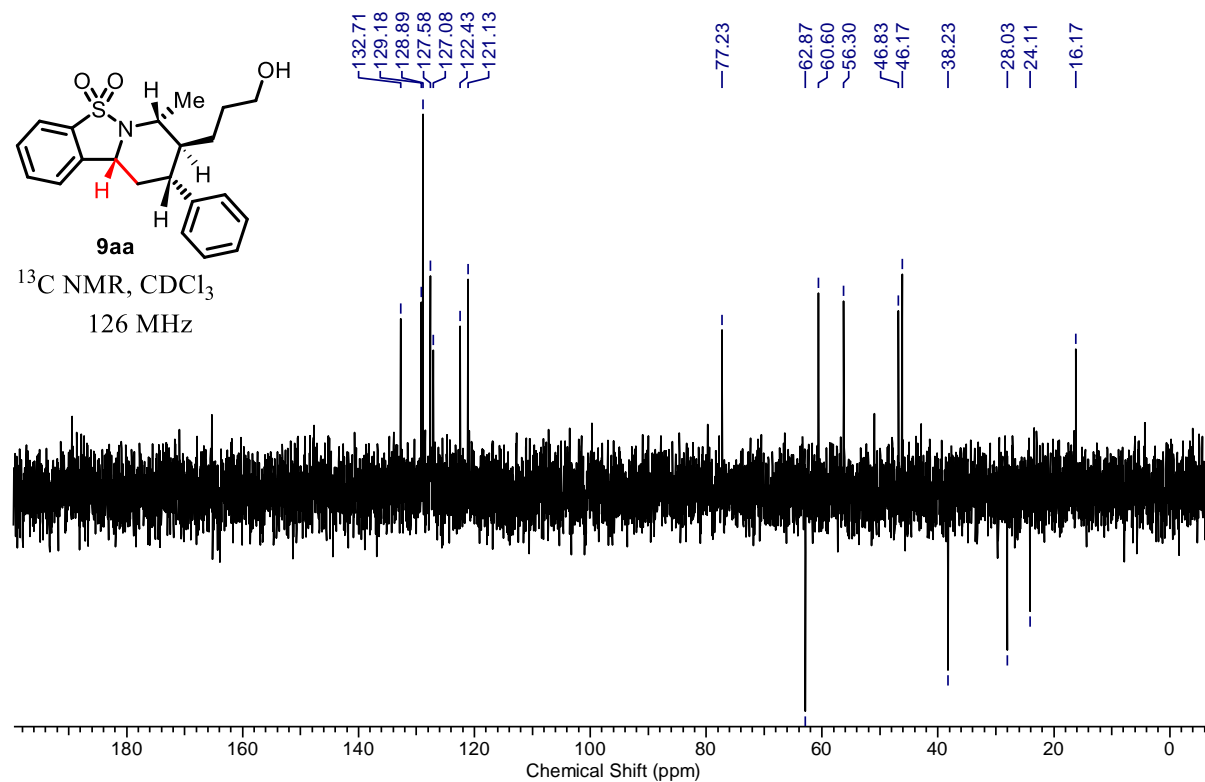

**NOESY correlation of Me-H<sup>a</sup>:**

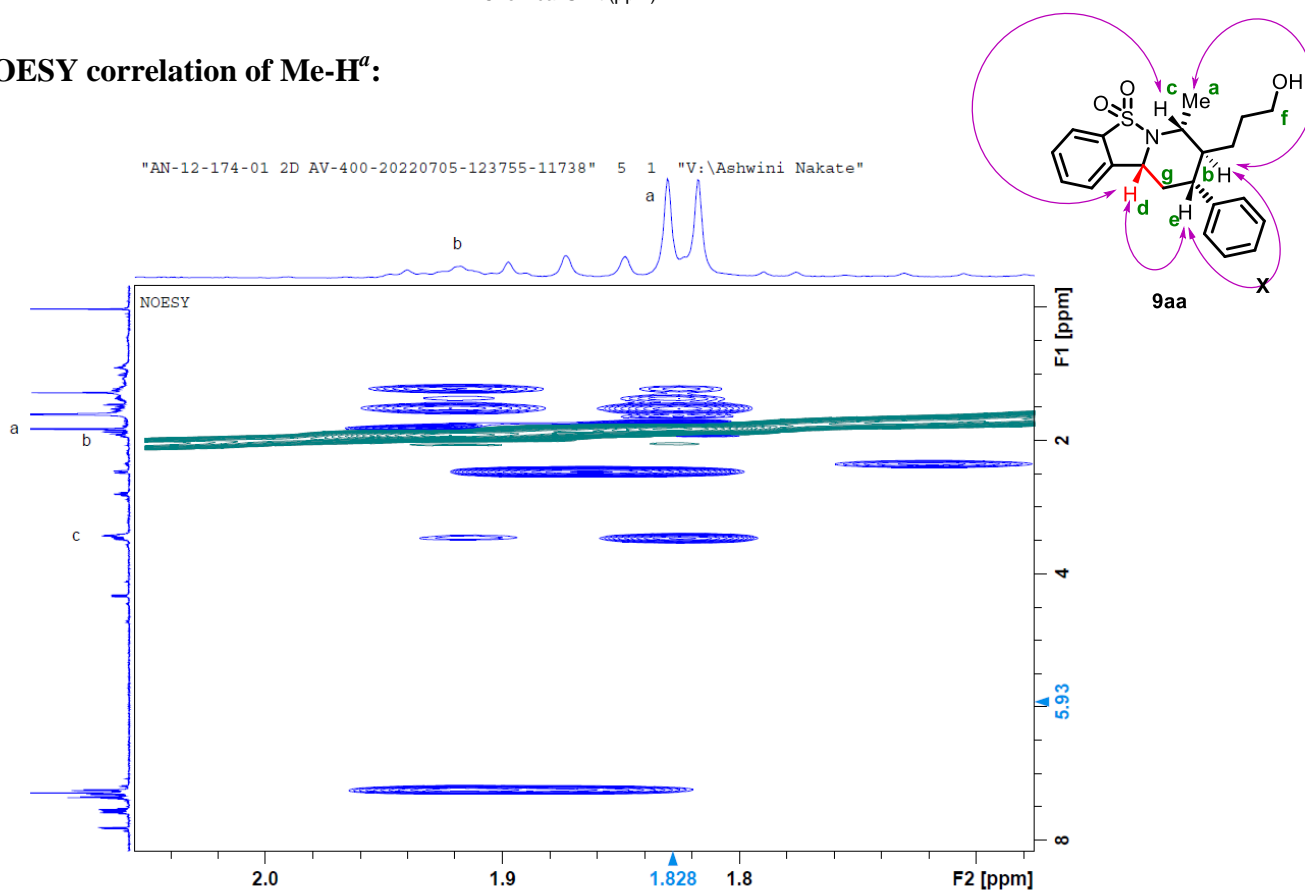

## NOESY correlation of N-C-H<sup>d</sup>:

"AN-12-174-01 2D AV-400-20220705-123755-11738" 5 1 "V:\Ashwini Nakate"

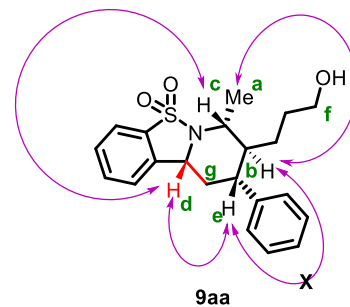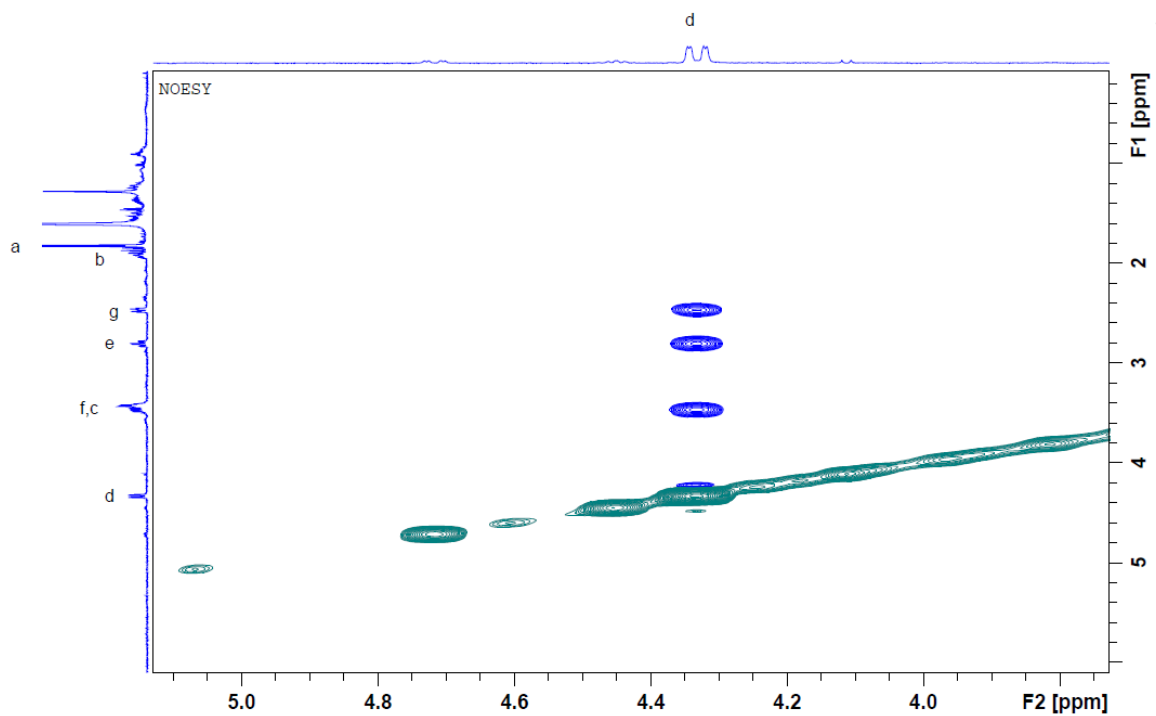

## NOESY:

"AN-12-174-01 2D AV-400-20220705-123755-11738" 5 1 "V:\Ashwini Nakate"

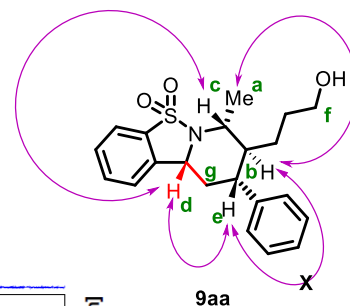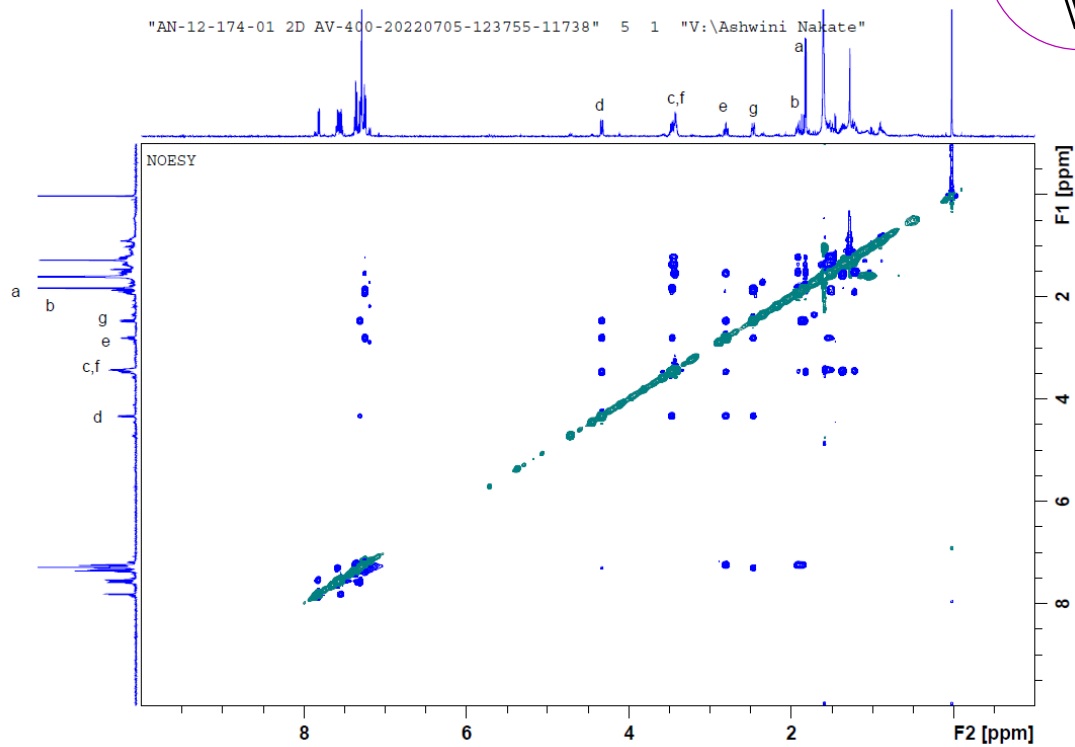



### COSY:

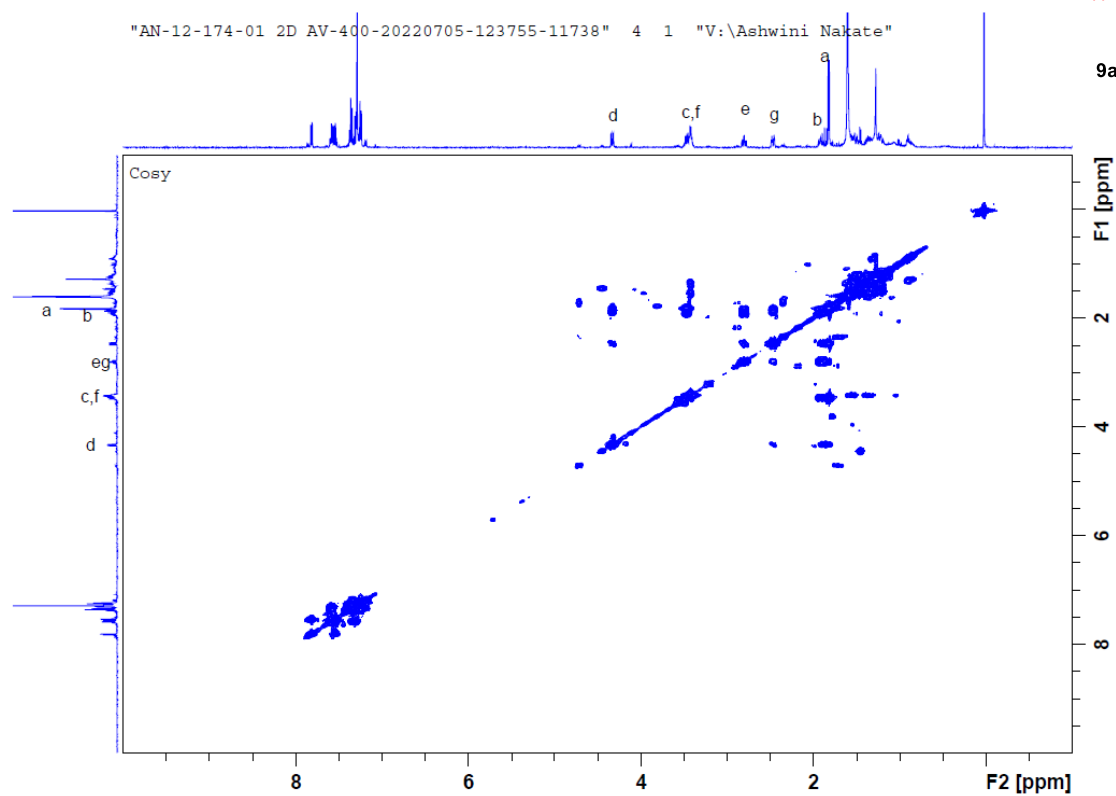

### HSQC:

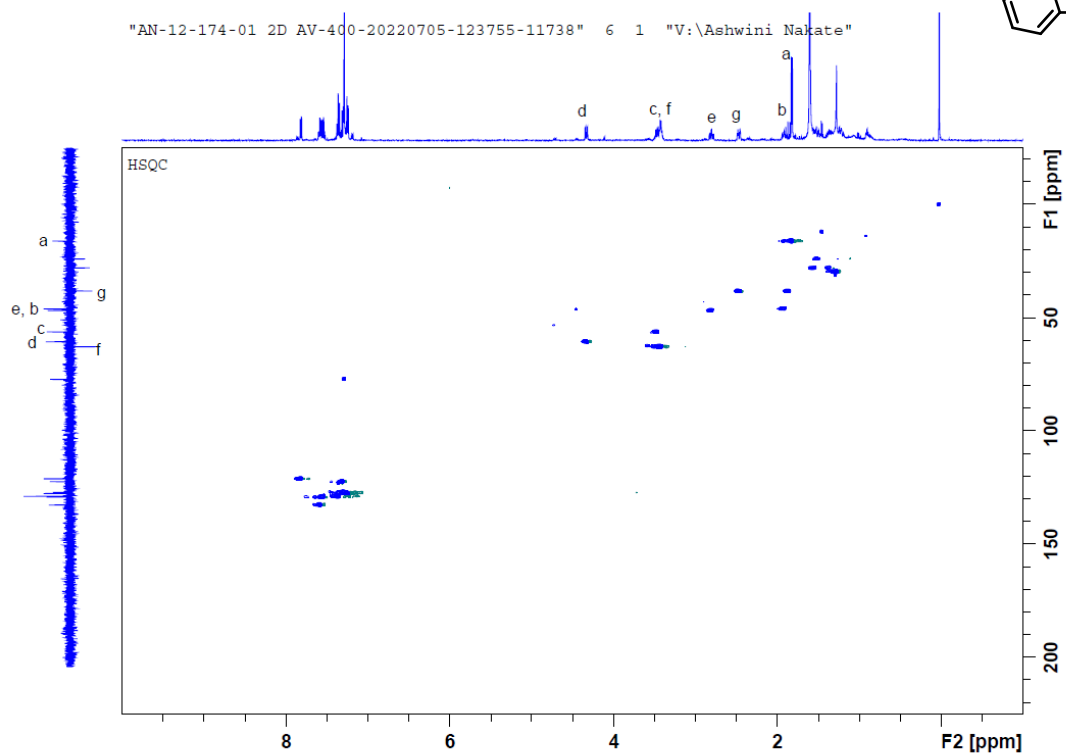

# HMBC:

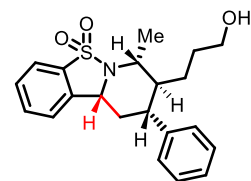

9aa

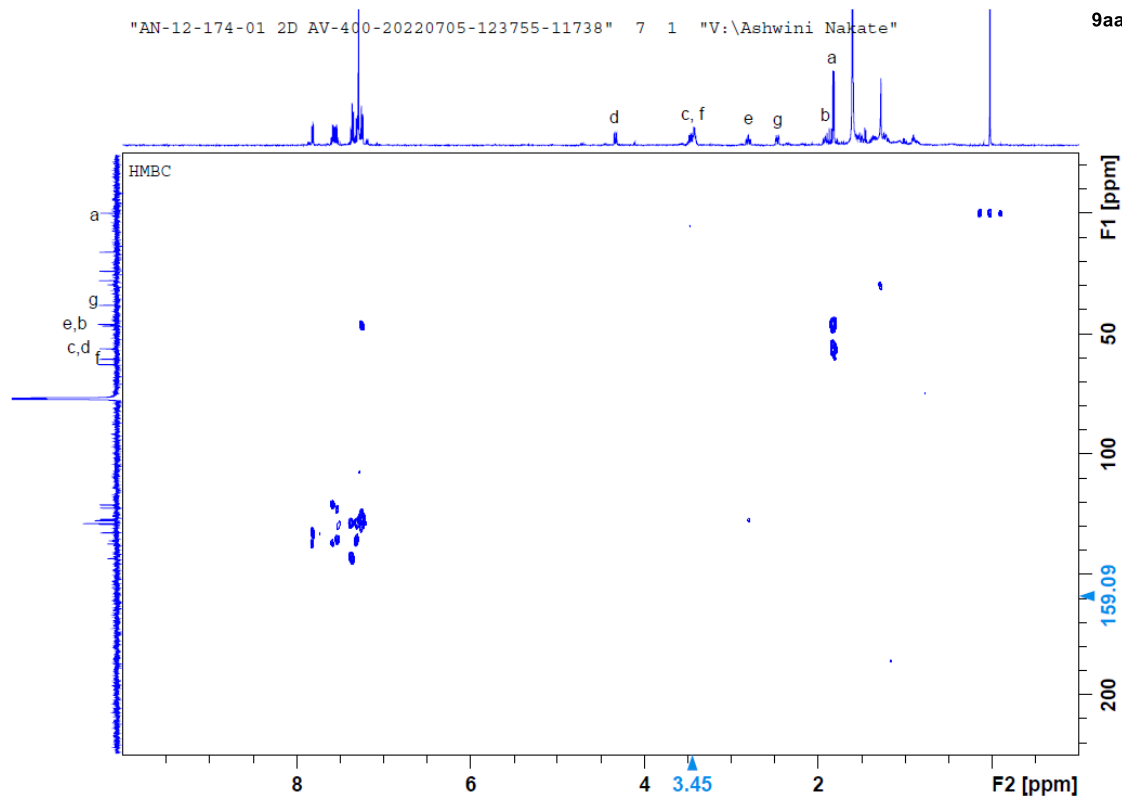

**12a-Methyl-5-phenyl-3,4,4a,6,6a,12a-hexahydro-2H,5H-benzo[4,5]isothiazolo[2,3-a]pyrano[3,2-e]pyridine 11,11-dioxide (10aa):**

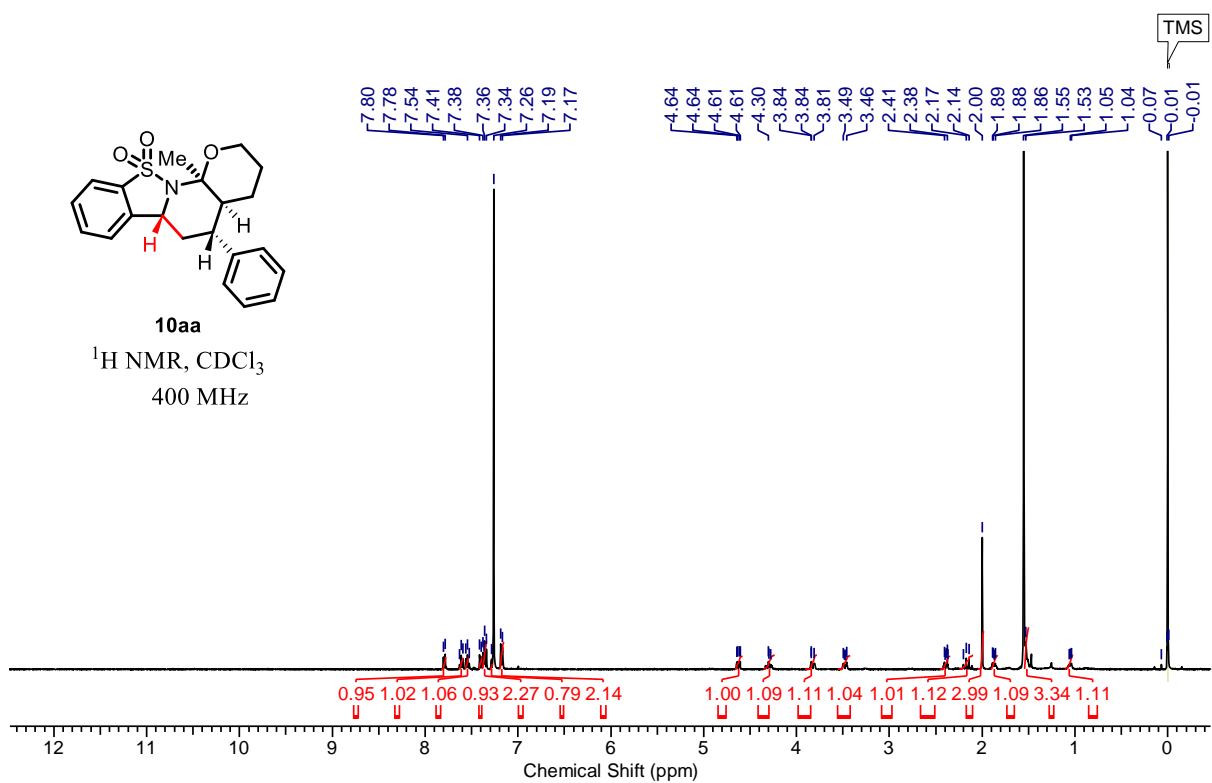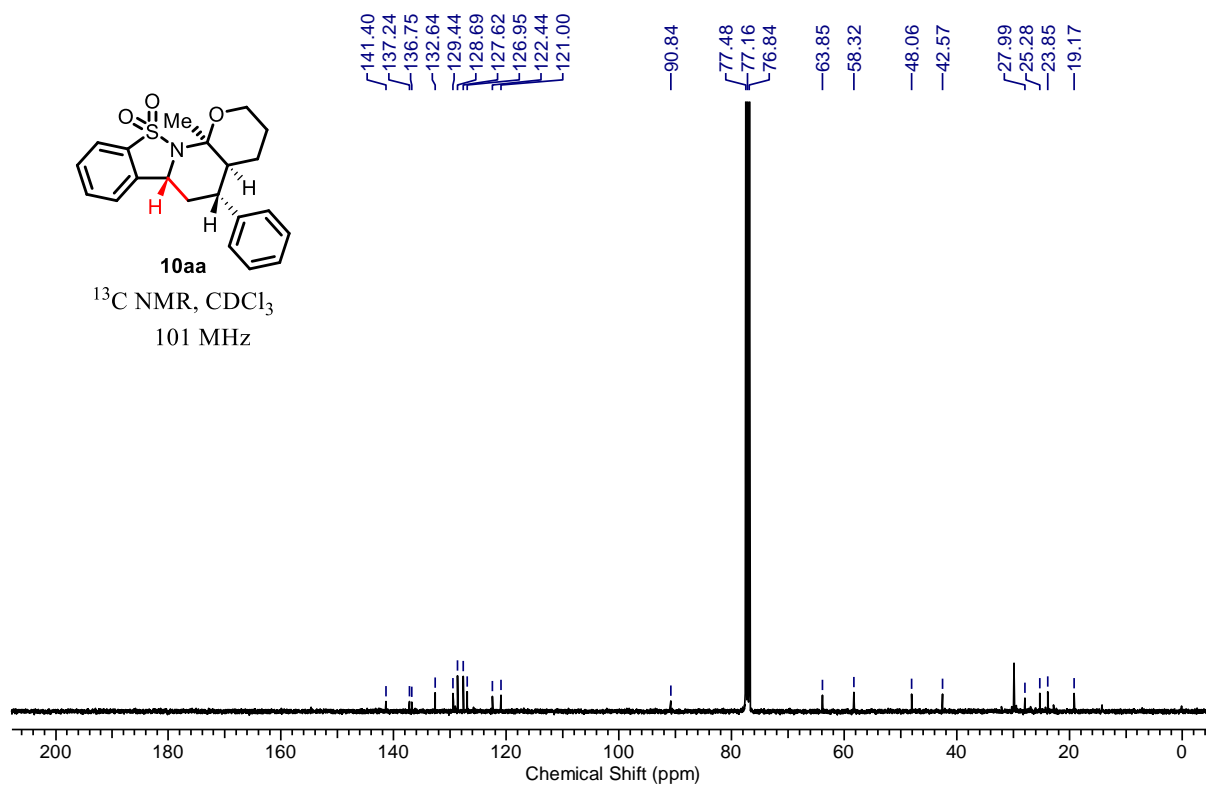

**5-(2-Methoxyphenyl)-3,4,4a,12a-tetrahydro-2H,5H-benzo[4,5]isothiazolo[2,3-a]pyrano[3,2-e]pyridine 11,11-dioxide (6Ti):**

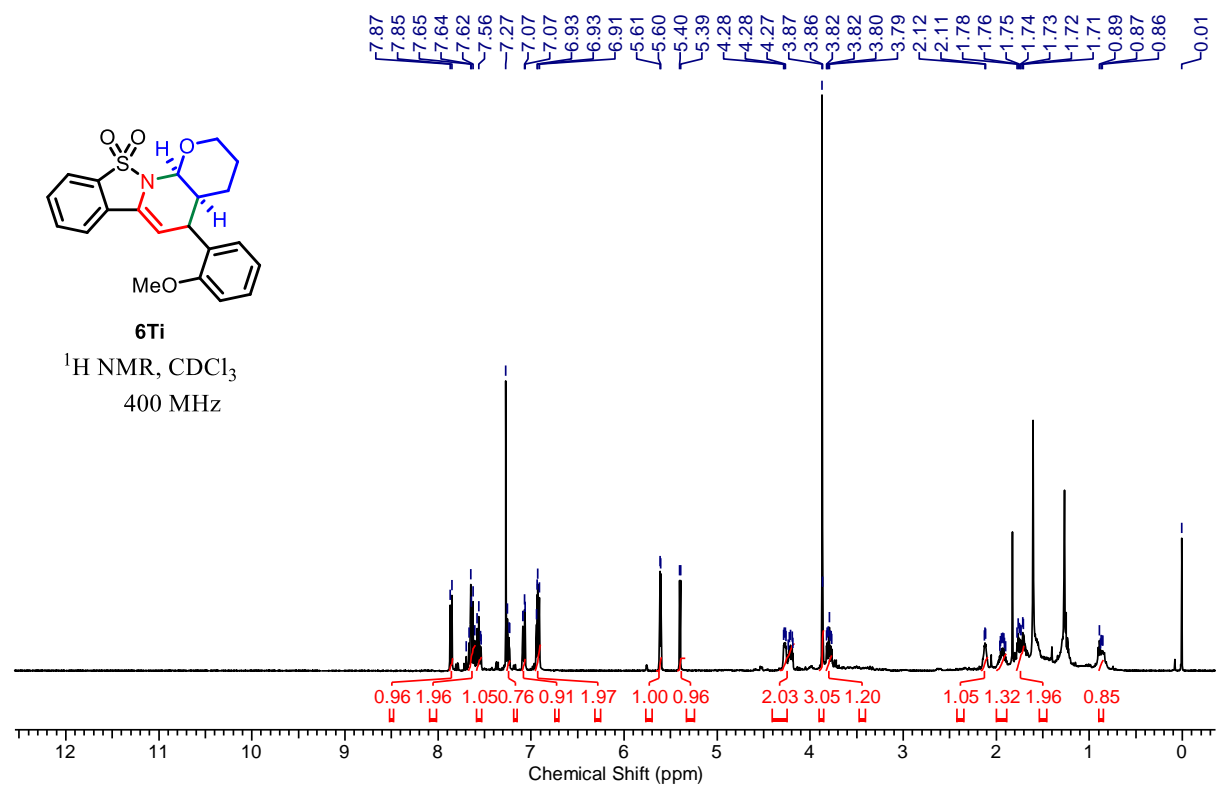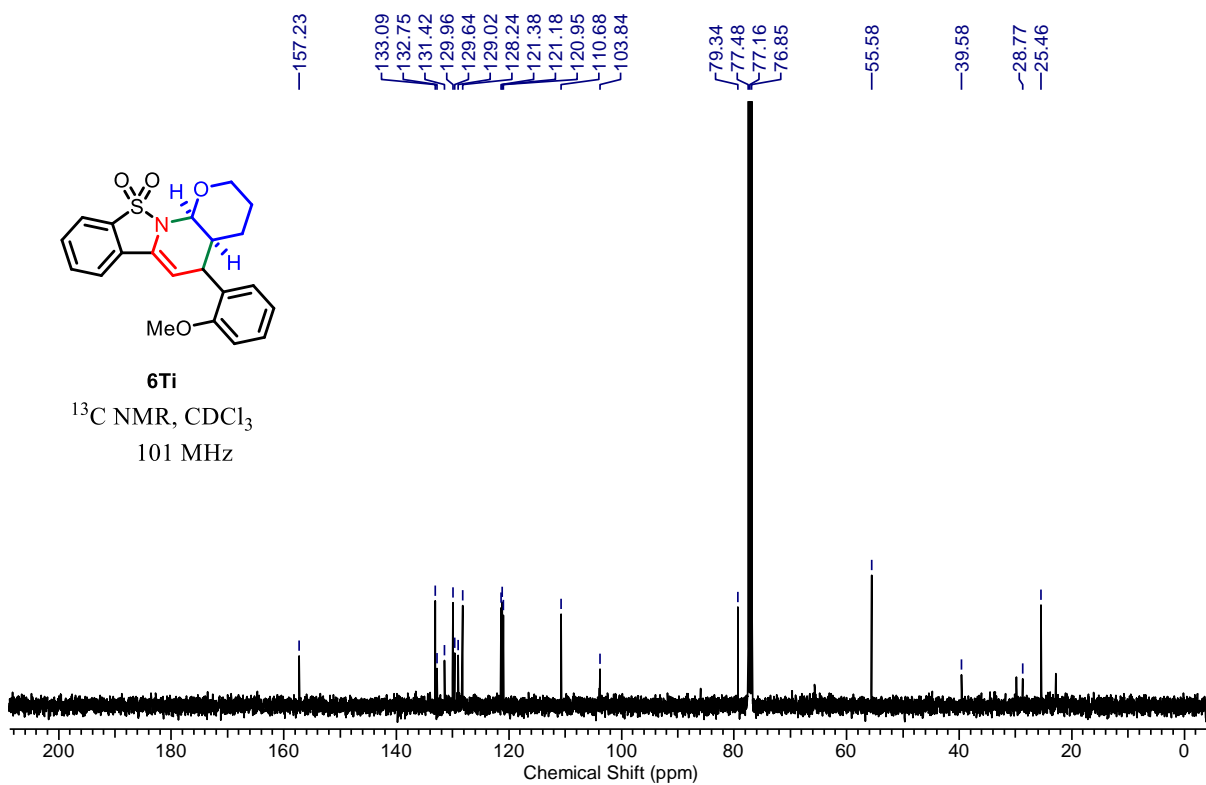

**THE END**
